# Supplementary material for: Cobalt-Catalyzed Cyclization of Unsaturated N-Acyl Sulfonamides: a Diverted Mukaiyama Hydration Reaction
Source: PubMed Central journal article supplement — JACS Au. 2022 May 6;2(5):1071–7. doi: 10.1021/jacsau.2c00186 (PMC9131372; doi:10.1021/jacsau.2c00186), 2022-05-06
Supplement: au2c00186_si_001.pdf [file au2c00186_si_001.pdf]

# Cobalt-Catalyzed Cyclization of Unsaturated *N*-Acyl Sulfonamides: a Diverted Mukaiyama Hydration Reaction

David M. Fischer, Moritz Balkenhohl, Erick M. Carreira\*

ETH Zurich, 8093 Zurich, Switzerland

## **Supporting information**

## General Information

Unless otherwise noted, all reactions were carried out under nitrogen atmosphere in glassware dried with a heat gun (650 °C) under high vacuum (<1 mbar). Syringes which were used to transfer anhydrous solvents or reagents were purged thrice with nitrogen prior to use. All reagents were purchased from commercial suppliers (ABCR, ACROS, Sigma Aldrich, Fluka, TCI, Strem, Alfa, Combi-Blocks or Fluorochem) and used without further purification. Anhydrous solvents over molecular sieves were purchase from Acros and used as received.

## Chromatography

Analytical thin layer chromatography (TLC) was performed on Merck silica gel 60 F254 TLC glass plates and visualized with 254 nm light and potassium permanganate followed by heating. Organic solutions were concentrated by rotary evaporation at 40 °C. Purification of reaction products was carried out by flash chromatography using Brunschwig silica 32-63, 60Å under 0.3–0.5 bar overpressure.

## Analytical Data

*NMR*: <sup>1</sup>H NMR spectra were recorded on a Bruker AVIII 600 MHz spectrometer with He or prodigy N<sub>2</sub> cryo-probes, Bruker AVIII HD 500 MHz and 400 spectrometers as well as Bruker Neo 500 MHz and 400 MHz spectrometers, and are reported in ppm with the solvent resonance as the reference unless noted otherwise (CDCl<sub>3</sub> at 7.26 ppm, C<sub>6</sub>D<sub>6</sub> at 7.16 ppm, CD<sub>2</sub>Cl<sub>2</sub> at 5.32 ppm, DMSO-d<sub>6</sub> at 2.50 ppm, CD<sub>3</sub>CN at 1.94 ppm). Peaks are reported as (s = singlet, d = doublet, t = triplet, q = quartet, m = multiplet or unresolved, br = broad signal, coupling constant(s) in Hz, integration). <sup>13</sup>C NMR spectra were recorded with 1H-decoupling on Bruker AVIII 150 MHz spectrometers with He or prodigy N<sub>2</sub> cryo-probes, Bruker AVIII HD 125 MHz and 100 MHz spectrometers as well as Bruker Neo 125 MHz and 100 MHz spectrometers, and are reported in ppm with the solvent resonance as the reference unless noted otherwise (CDCl<sub>3</sub> at 77.16 ppm, C<sub>6</sub>D<sub>6</sub> at 128.06 ppm, CD<sub>2</sub>Cl<sub>2</sub> at 54.00 ppm, DMSO-d<sub>6</sub> at 39.52 ppm, CD<sub>3</sub>CN at 1.32 ppm).

*Mass spectrometry.* High resolution mass spectrometric data were obtained at the mass spectrometry service operated by the Laboratory of Organic Chemistry at the ETHZ on VG-TRIBRID for electron impact ionization (ESI), Varian IonSpec Spectrometer for electrospray ionization (ESI), or IonSpec Ultima Fourier Transform Mass Spectrometer for matrix-assisted laser desorption/ionization (MALDI) and are reported as (m/z).

Infrared spectra (IR) were recorded neat on a Perkin-Elmer Spectrum Two FT-IR spectrometer. The main peaks are reported as absorption maxima (cm<sup>-1</sup>).

## General Procedures

### General Procedure 1: Preparation of unsaturated acyl sulfonamides

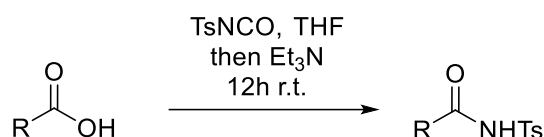

To a solution of carboxylic acid in dry THF (0.1M) under a nitrogen atmosphere, tosyl isocyanate (1.0 eq.) was added dropwise and the mixture stirred for 10 minutes. Then, Et<sub>3</sub>N (1.0 eq.) was added dropwise (caution: gas evolution upon addition) stirring was continued at r.t. for 12h. The reaction mixture was then diluted with EtOAc, washed with aq. HCl (3M, 20 mL) and brine (25 mL), dried using Na<sub>2</sub>SO<sub>4</sub>, filtered and the solvents removed in vacuo. Purification using silica gel chromatography with the appropriate eluent was employed where necessary.

### General Procedure 2: Cobalt catalyzed cycloisomerisation

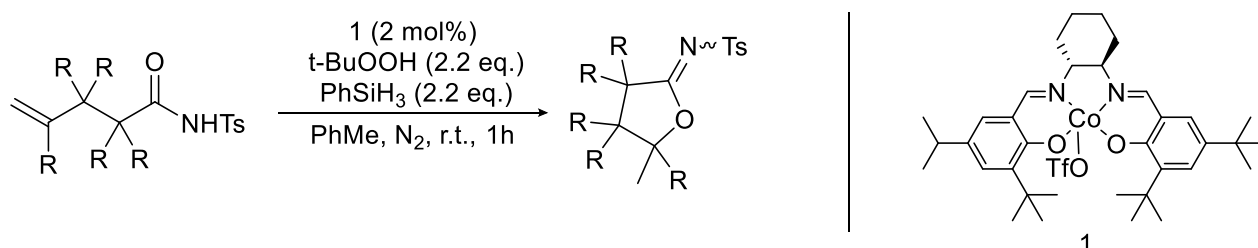

Under nitrogen atmosphere, substrates **4a-4w** and **6a-6g** (0.3 mmol, 1.0 eq.) and catalyst **1** (2 mol%), were dissolved in anhydrous toluene (3 mL, gentle heat was applied in case the substrate did not dissolve at r.t.). To the solution was then added sequentially *t*-BuOOH (5.5 M in decane, 0.6 mmol, 2.0 eq.) and PhSiH<sub>3</sub> (0.6 mmol, 2.0 eq.). The reaction mixture was then stirred at r.t. for 1-4h, transferred with EtOAc and the solvent removed in vacuo. Purification using silica gel chromatography with the appropriate eluent yielded the final products.

### General Procedure 3: Cobalt catalyzed cycloisomerisation with air

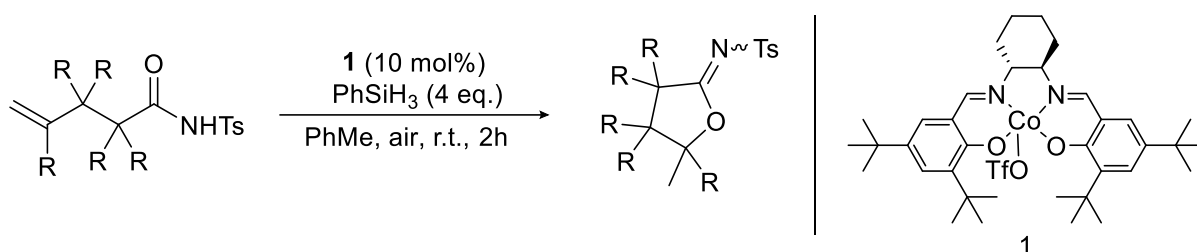

Selected substrates from **4a-4w** (0.3 mmol, 1.0 eq.) and catalyst **1** (10 mol%), were dissolved in toluene (3 mL, gentle heat was applied in case the substrate did not dissolve at r.t.). To the solution was then added PhSiH<sub>3</sub> (1.2 mmol, 4.0 eq.). The reaction mixture was then stirred open to ambient air at r.t. for 2h, diluted with EtOAc and the solvent removed in vacuo. Purification using silica gel chromatography with the appropriate eluent yielded the final products.

## Catalyst synthesis

### Co(III)-salen catalyst **1**

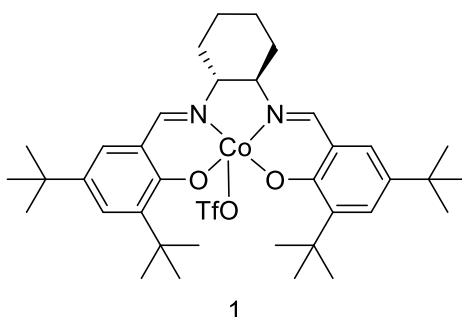

Cobalt catalyst **1** was prepared according to literature.<sup>1</sup>

## Optimization of the reaction with *t*-BuOOH

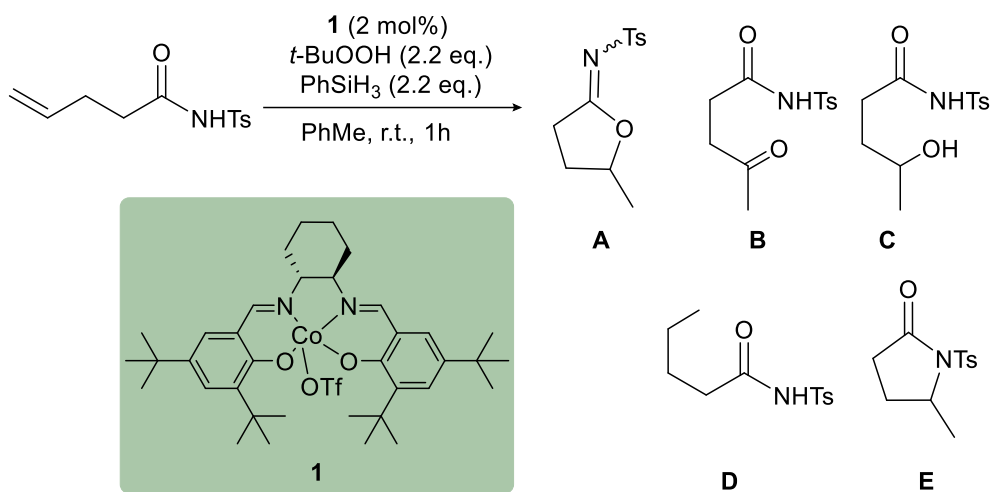

### Solvent screen

| Entry | Deviation from standard conditions              | A (%) | B (%) | C (%) | D (%) | E (%) |
|-------|-------------------------------------------------|-------|-------|-------|-------|-------|
| 1     | none                                            | 85    | 0     | 0     | 0     | 0     |
| 2     | <i>i</i> -PrOH instead of PhMe                  | 41    | 0     | 0     | 40    | 0     |
| 3     | THF instead of PhMe                             | 21    | 0     | 19    | 0     | 0     |
| 4     | PhCF <sub>3</sub> instead of PhMe               | 79    | 0     | 0     | 0     | 0     |
| 5     | DCE instead of PhMe                             | 50    | 0     | 0     | 0     | 0     |
| 6     | CH <sub>2</sub> Cl <sub>2</sub> instead of PhMe | 62    | 0     | 0     | 13    | 0     |
| 7     | 2-MeTHF instead of PhMe                         | 44    | 11    | 19    | 0     | 0     |
| 8     | EtOH instead of PhMe                            | 25    | 7     | 10    | 44    | 0     |
| 9     | MeCN instead of PhMe                            | 42    |       | 13    |       |       |

### Oxidant screen

| Entry | Deviation from standard conditions | A (%) | D (%) | E (%) |
|-------|------------------------------------|-------|-------|-------|
|-------|------------------------------------|-------|-------|-------|

|    |                                                  |    |   |    |
|----|--------------------------------------------------|----|---|----|
| 1  | none                                             | 85 | 0 | 0  |
| 2  | O <sub>2</sub> instead of <i>t</i> -BuOOH        | 62 | 0 | 0  |
| 4  | Cumyl-OOH instead of <i>t</i> -BuOOH             | 60 | 0 | 0  |
| 5  | MnO <sub>2</sub> instead of <i>t</i> -BuOOH      | 45 | 0 | 25 |
| 6  | AgOTf instead of <i>t</i> -BuOOH                 | 0  | 0 | 0  |
| 7  | NMO instead of <i>t</i> -BuOOH                   | 0  | 0 | 0  |
| 8  | <i>t</i> -BuONO instead of <i>t</i> -BuOOH       | 0  | 0 | 0  |
| 9  | 0.2 eq. <i>t</i> -BuOOH                          | 45 | 0 | 0  |
| 10 | 0.5 eq. <i>t</i> -BuOOH                          | 59 | 0 | 0  |
| 11 | 1.0 eq. <i>t</i> -BuOOH                          | 74 | 0 | 0  |
| 12 | No oxidant, N <sub>2</sub>                       | 4  | 0 | 0  |
| 13 | No oxidant, N <sub>2</sub> , 48h                 | 4  | 0 | 0  |
| 14 | Air, 1 h                                         | 10 |   |    |
| 15 | Air, 24 h                                        | 54 | 0 | 0  |
| 16 | Air, 4 eq. PhSiH <sub>3</sub> , 10 mol% <b>1</b> | 82 | 0 | 0  |

### Catalyst screen

| Entry | Deviation from standard conditions | A (%) | D (%) | E (%) |
|-------|------------------------------------|-------|-------|-------|
| 1     | none                               | 85    | 0     | 0     |
| 2     | Co(II)-salen S1                    | 18    | 0     | 39    |
| 3     | Co(II)-salen S2                    | 17    | 0     | 30    |
| 4     | Cr(III)Cl <sub>3</sub>             | 0     | 0     | 0     |
| 5     | Mn(dpm) <sub>3</sub>               | 0     | 0     | 0     |
| 6     | Fe(acac) <sub>2</sub>              | 0     | 0     | 0     |

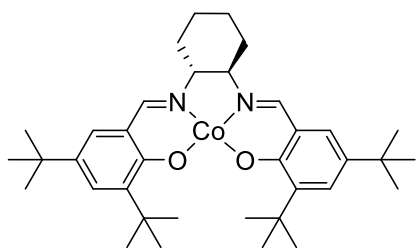

**S1**

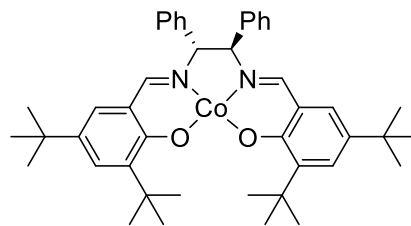

**S2**





## Mechanistic Discussion

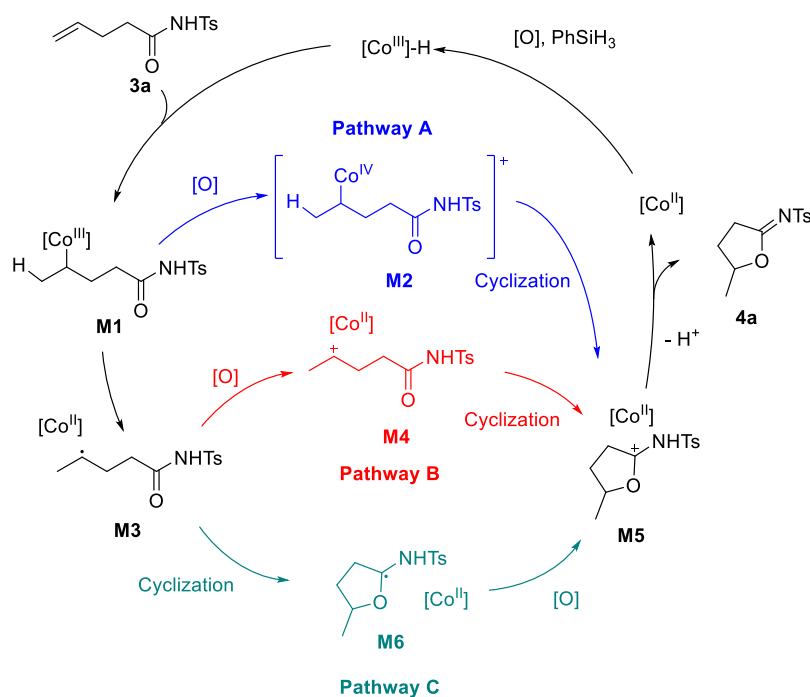

After initial formation of a Co(III) hydride species by the action of silane and oxidant, hydrocobaltation of olefin **3a** leads to secondary alkyl cobalt species **M1**. Shigehisa had previously proposed a pathway leading through high valent Co(IV) species, accessed either through external oxidation or by disproportionation of two Co(III) species, which we label as Pathway A in red. **M1** may be in equilibrium with Co(II) and a secondary alkyl radical **M3**, which may then alternatively proceed through one of two pathways to yield product **4a**. Pathway B involves initial oxidation of **M3** to cationic intermediate **M4** by either external oxidant (In our system, *tert*-BuOOH or  $\text{O}_2$  in air) or a second Co(III) species. **M4** might then undergo trapping by the pendant N-acyl sulfonamide as nucleophile to give cation **M5** which following deprotonation leads to product **4a**. Both pathways A and B are adapted from proposals hypothesized by Shigehisa; however, it is important to note Shigehisa employs in all reactions reported a strong  $\text{F}^+$  oxidant, namely *N*-fluorocollidinium salts. As an alternative pathway, **M3** may undergo cyclization to yield stabilized radical **M6**, which subsequently could undergo oxidation, leading to intermediate **M5**.

Although data is lacking that would allow unambiguous determination of the mechanism of this transformation, Pathways A and B are in line with transformations reported for Co(II) with strong oxidant. In considering Pathway C, we note that cyclopropyl substituted substrate **3e** did not exhibit ring opening under the reaction conditions. However, radical oxidation in **M6** may be very fast such that competing cyclopropyl opening becomes negligible.

## Starting material synthesis

### *N*-Tosylpent-4-enamide (3a)

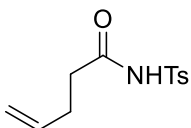

Acyl sulfonamide **3a** was prepared according to literature.<sup>2</sup>

### 1-Allyl-*N*-tosylcyclohexane-1-carboxamide (3b)

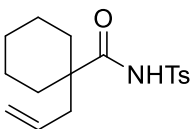

Acyl sulfonamide **3b** was prepared according to literature.<sup>2</sup>

### 1-Allyl-*N*-tosylcyclopentane-1-carboxamide (3c)

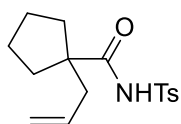

Acyl sulfonamide **3c** was prepared according to literature.<sup>2</sup>

### 1-Allyl-*N*-tosylcyclobutane-1-carboxamide (**3d**)

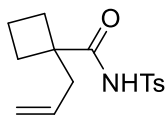

Acyl sulfonamide **3d** was prepared via GP1 from the corresponding carboxylic acid<sup>3</sup> (1.18 g, 8.41 mmol). The crude product was purified via column chromatography (0-40% EtOAc in hexanes,  $R_f$  (40% EtOAc in hexanes) = 0.5) to give **3d** (1.05 g, 3.57 mmol, 43%) as a colourless oil.

**<sup>1</sup>H-NMR** (400 MHz, CDCl<sub>3</sub>):  $\delta$  / ppm = 8.60 (s, 1H), 7.98 – 7.91 (m, 2H), 7.36 – 7.30 (m, 2H), 5.44 (ddt,  $J$  = 16.9, 10.2, 7.5 Hz, 1H), 4.90 (ddt,  $J$  = 10.2, 1.9, 0.9 Hz, 1H), 4.90 – 4.82 (m, 1H), 2.44 (s, 3H), 2.13 (dt,  $J$  = 7.5, 1.1 Hz, 2H), 1.92 – 1.85 (m, 2H), 1.57 – 1.43 (m, 3H), 1.36 – 1.16 (m, 5H). **<sup>13</sup>C-NMR** (101 MHz, CDCl<sub>3</sub>):  $\delta$  / ppm = 174.1, 145.0, 135.7, 132.0, 129.5, 128.5, 119.0, 48.0, 43.9, 33.4, 25.6, 22.6, 21.7. **FT-IR** (neat):  $\tilde{\nu}$  / cm<sup>-1</sup> 3273, 2940, 1715, 1403, 1342, 1147, 1064, 906, 730, 545. **HRMS** (ESI)  $m/z$  calc. for C<sub>15</sub>H<sub>20</sub>NO<sub>3</sub>S: 294.1158, found: 294.1157 (M+H)<sup>+</sup>.

### 1-Allyl-*N*-tosylcyclopropane-1-carboxamide (**3e**)

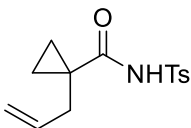

Acyl sulfonamide **3e** was prepared via GP1 from the corresponding carboxylic acid<sup>4</sup> (1.18 g, 8.41 mmol). The crude product was purified via column chromatography (0-40% EtOAc in hexanes,  $R_f$  (40% EtOAc in hexanes) = 0.5) to give **3e** (1.05 g, 3.57 mmol, 43%) as a colourless oil.

**<sup>1</sup>H-NMR** (400 MHz, CDCl<sub>3</sub>): δ / ppm = 8.51 (s, 1H), 7.90 (d, *J* = 8.4 Hz, 1H), 7.32 (d, *J* = 7.8 Hz, 1H), 5.85 (ddt, *J* = 17.4, 10.3, 6.3 Hz, 1H), 5.35 – 5.21 (m, 2H), 2.43 (s, 3H), 2.32 (d, *J* = 6.4 Hz, 1H), 1.30 – 1.18 (m, 2H), 0.78 – 0.66 (m, 2H). **<sup>13</sup>C-NMR** (101 MHz, CDCl<sub>3</sub>): δ / ppm = 172.1, 144.9, 135.6, 135.4, 129.5, 128.5, 118.6, 37.5, 23.5, 21.7, 16.5. **FT-IR** (neat):  $\tilde{\nu}$  / cm<sup>-1</sup> 3290, 1703, 1416, 1170, 1085, 660, 566, 547. **HRMS** (ESI) *m/z* calc. for C<sub>14</sub>H<sub>18</sub>NO<sub>3</sub>S: 280.1002, found: 280.1000 (M+H)<sup>+</sup>.

### 2,2-Dimethyl-*N*-tosylpent-4-enamide (3f)

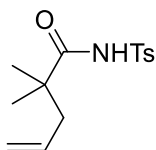

Acyl sulfonamide **3f** was prepared according to literature.<sup>2</sup>

### 2,2-Diphenyl-*N*-tosylpent-4-enamide (3g)

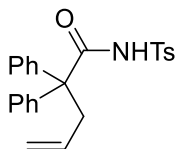

Acyl sulfonamide **3g** was prepared according to literature.<sup>5</sup>

### 4-Allyl-*N*-tosyltetrahydro-2H-pyran-4-carboxamide (3h)

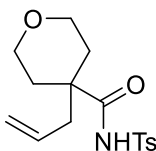

Acyl sulfonamide **3h** was prepared via GP1 from the corresponding carboxylic acid<sup>4</sup>(1.00 g, 5.88 mmol). The crude product was purified via column chromatography (0-10% EtOAc in

CH<sub>2</sub>Cl<sub>2</sub>, R<sub>f</sub> (5% EtOAc in CH<sub>2</sub>Cl<sub>2</sub>) = 0.3) to give **3h** (1.22 g, 3.77 mmol, 64%) as a colourless oil.

**<sup>1</sup>H-NMR** (400 MHz, CDCl<sub>3</sub>): δ / ppm = 8.38 (s, 1H), 7.97 – 7.91 (m, 2H), 7.38 – 7.32 (m, 2H), 5.46 (ddt, *J* = 16.8, 10.1, 7.4 Hz, 1H), 5.00 (ddt, *J* = 10.1, 1.7, 0.9 Hz, 1H), 4.94 (dq, *J* = 16.9, 1.3 Hz, 1H), 3.73 (dt, *J* = 12.1, 4.1 Hz, 2H), 3.45 – 3.37 (m, 2H), 2.46 (s, 3H), 2.22 (dt, *J* = 7.5, 1.1 Hz, 2H), 1.91 (dp, *J* = 14.2, 2.2 Hz, 2H), 1.55 (ddd, *J* = 14.2, 10.3, 4.1 Hz, 2H). **<sup>13</sup>C-NMR** (126 MHz, CDCl<sub>3</sub>): δ / ppm = 173.0, 145.5, 135.5, 131.1, 129.7, 128.7, 120.1, 64.6, 45.9, 43.8, 33.5, 21.9. **FT-IR** (neat):  $\tilde{\nu}$  / cm<sup>-1</sup> = 3271, 2950, 1711, 1416, 1343, 1168, 1123, 838, 659, 546. **HRMS** (ESI) *m/z* calc. for C<sub>16</sub>H<sub>21</sub>NNaO<sub>4</sub>S: 346.1084, found: 346.1085 (M+Na)<sup>+</sup>.

### tert-Butyl 3-allyl-3-(tosylcarbamoyl)azetidone-1-carboxylate (**3i**)

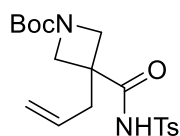

Acyl sulfonamide **3i** was prepared via GP1 from the corresponding carboxylic acid<sup>6</sup> (442 mg, 1.83 mmol). The crude product was purified via column chromatography (0-5% MeOH in CH<sub>2</sub>Cl<sub>2</sub>, R<sub>f</sub> (4% MeOH in CH<sub>2</sub>Cl<sub>2</sub>) = 0.3) to give **3i** (240 mg, 0.602 mmol, 33%) as a colorless oil.

**<sup>1</sup>H-NMR** (500 MHz, CDCl<sub>3</sub>): δ / ppm = δ 8.56 (s, 1H), 7.97 – 7.91 (m, 2H), 7.38 – 7.32 (m, 2H), 5.58 (ddt, *J* = 17.2, 10.2, 7.1 Hz, 1H), 5.13 – 5.01 (m, 2H), 4.03 (d, *J* = 8.8 Hz, 2H), 3.76 – 3.69 (m, 2H), 2.54 (d, *J* = 7.1 Hz, 1H), 2.45 (s, 3H), 1.42 (s, 9H). **<sup>13</sup>C-NMR** (126 MHz, CDCl<sub>3</sub>): δ / ppm = 171.0, 156.4, 145.6, 135.2, 131.0, 129.8, 128.7, 128.5, 120.4, 80.6, 55.7, 43.5, 40.0, 28.4, 21.9. **FT-IR** (neat):  $\tilde{\nu}$  / cm<sup>-1</sup> = 2978, 1706, 1668, 1424, 1166, 856, 660, 566. **HRMS** (ESI) *m/z* calc. for C<sub>19</sub>H<sub>26</sub>N<sub>2</sub>NaO<sub>5</sub>S: 417.1455, found: 417.1456 (M+Na)<sub>[d4]</sub><sup>+</sup>.

### tert-Butyl 4-allyl-4-(tosylcarbamoyl)piperidine-1-carboxylate (**3j**)

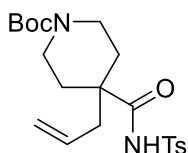

Acyl sulfonamide **3j** was prepared via GP1 from the corresponding carboxylic acid<sup>7</sup> (433 mg, 2.20 mmol). The crude product was purified via column chromatography (0-5% MeOH in CH<sub>2</sub>Cl<sub>2</sub>, Rf (4% MeOH in CH<sub>2</sub>Cl<sub>2</sub>) = 0.3) to give **3j** (720 mg, 1.70 mmol, 85%) as a colourless oil.

**<sup>1</sup>H-NMR** (500 MHz, CDCl<sub>3</sub>): δ / ppm = 8.81 (s, 1H), 7.95 – 7.89 (m, 2H), 7.38 – 7.31 (m, 2H), 5.44 (ddt, *J* = 16.9, 10.2, 7.4 Hz, 1H), 5.00 – 4.89 (m, 2H), 3.70 (s, 2H), 2.92 (s, 2H), 2.45 (s, 3H), 2.20 (d, *J* = 7.4 Hz, 2H), 1.93 (dddd, *J* = 13.9, 4.9, 3.0, 1.6 Hz, 2H), 1.42 (s, 9H). **<sup>13</sup>C-NMR** (126 MHz, CDCl<sub>3</sub>): δ / ppm = 173.1, 154.8, 145.4, 135.5, 131.2, 129.7, 128.6, 119.9, 79.9, 46.7, 43.3, 32.7, 28.5, 21.8. **FT-IR** (neat):  $\tilde{\nu}$  / cm<sup>-1</sup> = 3272, 2928, 1692, 1658, 1419, 1158, 855, 771, 730, 659, 546. **HRMS** (ESI) *m/z* calc. for C<sub>21</sub>H<sub>30</sub>N<sub>2</sub>NaO<sub>5</sub>S: 445.1768, found: 445.1768 (M+Na)<sup>+</sup>.

### 3-Methyl-*N*-tosylpent-4-enamide (**3k**)

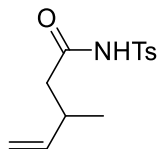

Acyl sulfonamide **3k** was prepared via GP1 from the corresponding carboxylic acid (commercial) (571 mg, 8.00 mmol). The crude product was purified via column chromatography (0-40% EtOAc in hexanes, Rf (40% EtOAc in hexanes) = 0.6) to give **3k** (1.17 g, 4.40 mmol, 88%) as a colourless oil.

**<sup>1</sup>H-NMR** (400 MHz, CDCl<sub>3</sub>): δ / ppm = 8.97 (s, 1H), 7.97 – 7.91 (m, 2H), 7.37 – 7.30 (m, 2H), 5.65 (ddd, *J* = 17.3, 10.3, 7.1 Hz, 1H), 4.94 – 4.85 (m, 2H), 2.66 – 2.54 (m, 1H), 2.44 (s, 3H), 2.28 (dd, *J* = 14.9, 7.3 Hz, 1H), 2.21 (dd, *J* = 14.9, 7.0 Hz, 1H), 0.96 (d, *J* = 6.8 Hz, 3H). **<sup>13</sup>C-NMR** (101 MHz, CDCl<sub>3</sub>): δ / ppm = 169.9, 145.3, 141.7, 135.6, 129.7, 128.5, 114.4, 43.3, 34.4, 21.8, 19.7. **FT-IR** (neat):  $\tilde{\nu}$  / cm<sup>-1</sup> 3242, 2966, 1694, 1436, 1164, 1086, 852, 660, 549. **HRMS** (ESI) *m/z* calc. for C<sub>13</sub>H<sub>17</sub>NNaO<sub>3</sub>S: 290.0821, found: 290.0820 (M+Na)<sup>+</sup>.<sup>[d5]</sup>

### 3-Phenyl-*N*-tosylpent-4-enamide (3l)

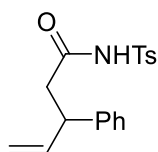

Acyl sulfonamide **3l** was prepared according to literature.<sup>2</sup>

### 3,3-Dimethyl-*N*-tosylpent-4-enamide (3m)

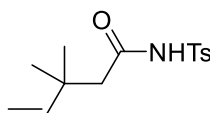

Acyl sulfonamide **3m** was prepared via GP1 from the corresponding carboxylic acid <sup>8</sup>(1.28 g, 10.0 mmol). The crude product was purified via column chromatography (0-40% EtOAc in hexanes, *R<sub>f</sub>* (30% EtOAc in hexanes) = 0.5) to give **3m** (2.30 g, 8.17 mmol, 82%) as a colourless oil.

**<sup>1</sup>H-NMR** (400 MHz, CDCl<sub>3</sub>): δ / ppm = 8.49 (s, 1H), 7.94– 7.91 (m, 2H), 7.35 – 7.29 (m, 2H), 5.81 (dd, *J* = 17.4, 10.7 Hz, 1H), 5.06 – 4.91 (m, 2H), 2.44 (s, 3H), 2.21 (s, 2H), 1.03 (s, 5H).

**<sup>13</sup>C-NMR** (101 MHz, CDCl<sub>3</sub>): δ / ppm = 168.9, 146.2, 145.2, 135.7, 129.6, 128.6, 113.1, 49.2, 36.7, 26.8, 21.8. **FT-IR** (neat):  $\tilde{\nu}$  / cm<sup>-1</sup> 3251, 2966, 2932, 2871, 1719, 1597, 1425, 1334, 1164, 1082, 933, 812, 715, 658, 544. **HRMS** (ESI) *m/z* calc. for C<sub>14</sub>H<sub>19</sub>NNaO<sub>3</sub>S: 304.0978, found: 304.0980 (M+Na)<sup>+</sup>.

### 4-Methyl-*N*-tosylpent-4-enamide (3n)

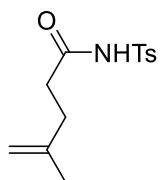

Acyl sulfonamide **3n** was prepared according to literature.<sup>9</sup>

### ***N*-Tosylhex-5-enamide (3o)**

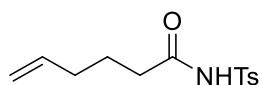

Acyl sulfonamide **3o** was prepared according to literature.<sup>2</sup>

### **2-Allyl-*N*-tosylbenzamide (3p)**

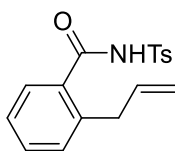

Acyl sulfonamide **3p** was prepared according to literature.<sup>2</sup>

### **1-Allyl-*N*-tosyl-1H-pyrrole-2-carboxamide (3q)**

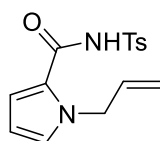



Acyl sulfonamide **3q** was prepared according to literature.<sup>2</sup>

**But-3-en-1-yl tosylcarbamate (3r)**

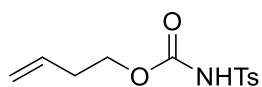

Acyl sulfonamide **3r** was prepared according to literature.<sup>2</sup>

**N-tosylbut-3-enamide (3s)**

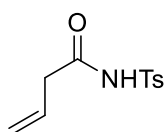

Acyl sulfonamide **3s** was prepared according to literature.<sup>10</sup>

**(E)-5-Methyl-N-tosylpent-4-enamide (3t)**

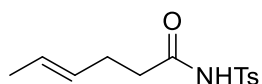

Acyl sulfonamide **3t** was prepared according to literature.<sup>12</sup>

**(E)-5-Phenyl-N-tosylpent-4-enamide (3u)**

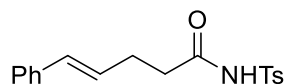

Acyl sulfonamide **3u** was prepared according to literature.<sup>11</sup>

**(E)-N-Tosylhepta-4,6-dienamide (3v)**

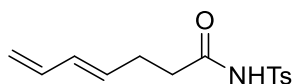

Acyl sulfonamide **3v** was prepared via GP1 from the corresponding carboxylic acid<sup>13</sup> (1.10 g, 8.72 mmol). The crude product was purified via column chromatography (0-40% EtOAc in hexanes, R<sub>f</sub> (30% EtOAc in hexanes) = 0.6) to give **3v** (1.71 g, 6.11 mmol, 70%) as a colourless oil.

**<sup>1</sup>H-NMR** (400 MHz, CDCl<sub>3</sub>): δ / ppm = 9.00 (s, 1H), 7.97 – 7.90 (m, 2H), 7.37 – 7.30 (m, 2H), 6.21 (dtd, *J* = 16.9, 10.2, 0.7 Hz, 1H), 5.97 (dddt, *J* = 15.4, 10.4, 1.4, 0.7 Hz, 1H), 5.56 (dddt, *J* = 15.2, 6.9, 6.1, 0.7 Hz, 1H), 5.06 (ddt, *J* = 17.0, 1.7, 0.7 Hz, 1H), 4.98 (ddt, *J* = 10.1, 1.6, 0.7 Hz, 1H), 2.43 (d, *J* = 0.7 Hz, 3H), 2.41 – 2.29 (m, 4H). **<sup>13</sup>C-NMR** (101 MHz, CDCl<sub>3</sub>): δ / ppm = 170.5, 145.3, 136.7, 135.6, 132.6, 131.7, 129.8, 128.4, 116.2, 35.8, 27.2, 21.8. **FT-IR** (neat):  $\tilde{\nu}$  / cm<sup>-1</sup> = 3240, 2921, 1721, 1696, 1440, 1170, 1087, 855, 814, 662, 549. **HRMS** (ESI) *m/z* calc. for C<sub>14</sub>H<sub>18</sub>NO<sub>3</sub>S: 280.1002, found: 280.1003 (M+H)<sup>+</sup>.

### (*E*)-5-Phenyl-*N*-tosylpent-4-enamide (**3w**)

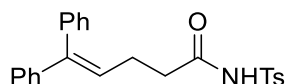

Acyl sulfonamide **3w** was prepared via GP1 from the corresponding carboxylic acid<sup>14</sup> (668 mg, 2.64 mmol). The crude product was purified via column chromatography (0-40% EtOAc in hexanes, R<sub>f</sub> (25% EtOAc in hexanes) = 0.4) to give **3w** (963 mg, 2.37 mmol, 90%) as a colourless oil.

**<sup>1</sup>H-NMR** (400 MHz, CDCl<sub>3</sub>): δ / ppm = 8.07 (s, 1H), 7.94 – 7.88 (m, 2H), 7.37 – 7.33 (m, 2H), 7.33 – 7.27 (m, 3H), 7.26 – 7.20 (m, 3H), 7.18 – 7.10 (m, 2H), 7.13 – 7.05 (m, 2H), 6.00 – 5.84 (m, 1H), 2.42 (d, *J* = 0.8 Hz, 3H), 2.40 – 2.32 (m, 4H). **<sup>13</sup>C-NMR** (101 MHz, CDCl<sub>3</sub>): δ / ppm = 169.8, 145.4, 144.0, 142.1, 139.5, 135.6, 129.8, 129.8, 128.6, 128.5, 128.3, 127.5, 127.4, 127.4, 126.1, 36.5, 24.7, 21.8. **FT-IR** (neat):  $\tilde{\nu}$  / cm<sup>-1</sup> = 3242, 2921, 1722, 1694, 1442, 1170, 1087, 813, 762, 701, 661, 550. **HRMS** (ESI) *m/z* calc. for C<sub>24</sub>H<sub>24</sub>NO<sub>3</sub>S: 406.1471, found: 406.1474 (M+H)<sup>+</sup>.

#### 4-Hydroxy-*N*-tosylpentanamide (I)

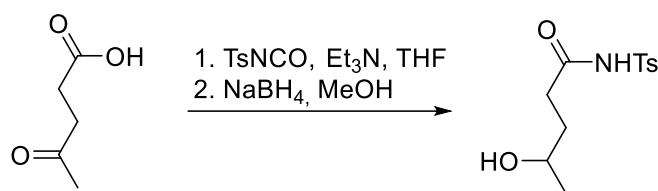

To a solution of 4-oxo-pentanoic acid (547 mg, 4.71 mmol, 1.00 eq.) in dry THF (23.5 mL) under a nitrogen atmosphere, tosyl isocyanate (976 mg, 4.95 mmol, 1.05 eq.) was added dropwise and the mixture stirred for 10 minutes. Then, Et<sub>3</sub>N (501 mg, 4.95 mmol, 1.05 eq.) was added dropwise (caution: gas evolution up addition) stirring was continued at r.t. for 12h. The reaction mixture was then diluted with EtOAc (50 mL), washed with aq. HCl (3M, 20 mL) and brine (25 mL), dried using Na<sub>2</sub>SO<sub>4</sub>, filtered and the solvents removed in vacuo. The crude product was used directly in the next step.

To a solution of the crude product in MeOH (23.5 mL) was added NaBH<sub>4</sub> (476 mg, 14.1 mmol, 3.00 eq.) and the mixture stirred at r.t. for 2h. Then the reaction was quenched by careful addition of sat. aq. NH<sub>4</sub>Cl (5 mL). The organic solvent was removed in vacuo and the residue dissolved in EtOAc (20 mL), diluted with water and the organic phase isolated. The aqueous phase was extracted with EtOAc (3 x 15 mL), the combined organic extracts washed with brine and dried over Na<sub>2</sub>SO<sub>4</sub>, filtered and the solvent removed in vacuo. The crude product was purified via column chromatography (20-80% EtOAc in hexanes, R<sub>f</sub> (60% EtOAc in hexanes) = 0.3) to give **I** (212 mg, 0.966 mmol, 21%) as a colourless oil.

**<sup>1</sup>H-NMR** (400 MHz, CDCl<sub>3</sub>): δ / ppm = 7.96 – 7.88 (m, 2H), 7.35 – 7.29 (m, 2H), 3.81 (dtd, *J* = 12.3, 6.2, 3.3 Hz, 1H), 2.42 (m, 3H), 2.46 – 2.35 (m, 2H), 1.79 (dddd, *J* = 14.4, 7.5, 6.9, 3.4 Hz, 1H), 1.68 – 1.57 (m, 1H), 1.18 (d, *J* = 6.2 Hz, 3H). **<sup>13</sup>C-NMR** (101 MHz, CDCl<sub>3</sub>): δ / ppm = 171.9, 145.1, 135.8, 129.7, 128.5, 67.7, 33.3, 32.9, 23.7, 21.8. **FT-IR** (neat):  $\tilde{\nu}$  / cm<sup>-1</sup> 3503, 3251, 2969, 1717, 1445, 1338, 1171, 1086, 852, 662, 549. **HRMS** (ESI) *m/z* calc. for C<sub>12</sub>H<sub>17</sub>NNaO<sub>4</sub>S: 294.0770, found: 294.0770 (M+Na)<sup>+</sup>.

**4-Hydroxy-*N*-tosylpentanamide (I) was also prepared from acyl sulfonamide 3a via Mukaiyama hydration:**

Under oxygen atmosphere, **3a** (50.6 mg, 0.200 mmol, 1.0 eq.) and Co(acac)<sub>2</sub>·d<sub>6</sub> (2.6 mg, 0.010 mmol, 5 mol%), were dissolved in anhydrous THF (2 mL). To the solution was then added

PhSiH<sub>3</sub> (61.6  $\mu$ L, 0.500 mmol, 2.5 eq.). The reaction mixture was then stirred at r.t. over night, and the solvent removed in vacuo. Purification using silica gel chromatography (20-80% EtOAc in hexanes, R<sub>f</sub> (60% EtOAc in hexanes) = 0.3) gave **I** (25.0 mg, 0.0921 mmol, 46%) as a colourless oil.

### ***N*-((2,4,6-Triisopropylphenyl)sulfonyl)pent-4-enamide (5a)**

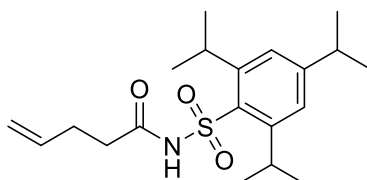

Prepared according to modified literature procedure.<sup>2</sup> DMAP<sub>[d7]</sub> (672 mg, 5.50 mmol, 1.10 equiv) was added to a suspension of EDCI•HCl (1.05 g, 5.50 mmol, 1.10 equiv) in CH<sub>2</sub>Cl<sub>2</sub> (20 mL). The mixture was stirred at rt until all the solids dissolved and then it was cooled to 0°C. 4-pentenoic acid (551 mg, 5.00 mmol, 1.00 equiv) was added, followed by triisopropylphenylsulfonamide (1.42 g, 5.50 mmol, 1.00 equiv) and the mixture was stirred at rt for 24 h. Et<sub>2</sub>O (20 mL) was then added, the organic mixture washed with aq. HCl (2M, 30 mL) and the aqueous layer extracted with EtOAc (3 x 20 mL). The combined organic layers were washed with brine, dried over Na<sub>2</sub>SO<sub>4</sub>, filtered and concentrated in vacuo. The crude product was purified via column chromatography (0-40% EtOAc in hexane, R<sub>f</sub> (25% EtOAc in hexanes) = 0.3) to give **5a** (1.52 g, 4.16 mmol, 83% yield) as a colourless oil.

**<sup>1</sup>H-NMR** (400 MHz, CDCl<sub>3</sub>):  $\delta$  / ppm = 9.11 (s, 1H), 7.29 – 7.23 (m, 2H), 5.88 – 5.72 (m, 1H), 5.11 – 4.97 (m, 2H), 4.27 (hept,  $J$  = 6.8 Hz, 2H), 2.97 (p,  $J$  = 6.9 Hz, 1H), 2.46 – 2.33 (m, 4H), 1.37 (d,  $J$  = 6.8 Hz, 12H), 1.32 (d,  $J$  = 6.9 Hz, 6H). **<sup>13</sup>C-NMR** (101 MHz, CDCl<sub>3</sub>):  $\delta$  / ppm = 170.6, 154.3, 151.4, 136.1, 131.3, 124.2, 116.3, 35.5, 34.4, 29.7, 28.2, 24.8, 23.6. **FT-IR** (neat):  $\tilde{\nu}$  / cm<sup>-1</sup> = 3233, 2960, 1724, 1599, 1429, 852, 659, 554. **HRMS** (ESI)  $m/z$  calc. for C<sub>20</sub>H<sub>32</sub>NO<sub>3</sub>S: 366.2097, found: 366.2093 (M+H)<sup>+</sup>.

### ***N*-((4-Methoxyphenyl)sulfonyl)pent-4-enamide (5b)**

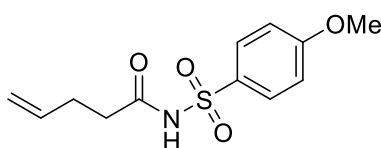

Acyl sulfonamide **5b** was prepared according to literature.<sup>2</sup>

***N*-(Methylsulfonyl)pent-4-enamide (5c)**

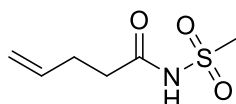

Acyl sulfonamide **5c** was prepared according to literature.<sup>15</sup>

***N*-(Trifluoromethylsulfonyl)pent-4-enamide (5d)**

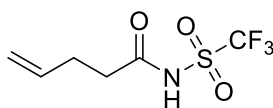

Acyl sulfonamide **5d** was prepared according to literature.<sup>15</sup>

***tert*-Butyl (but-3-en-1-ylsulfonyl)-1,2-azanecarboxylate (5e)**

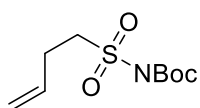

Acyl sulfonamide **5e** was prepared according to literature.<sup>16</sup>

***N*-(*tert*-Butylsulfinyl)pent-4-enamide (5f)**

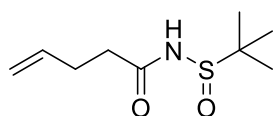

Acyl sulfinamide **5f** was prepared according to literature.<sup>15</sup>

## Cobalt catalyzed cycloisomerization

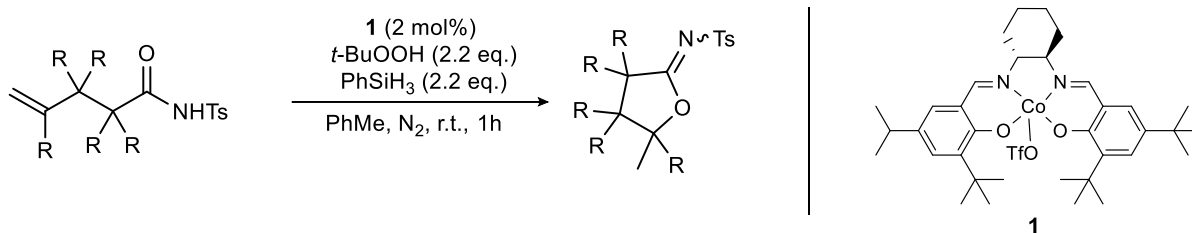

### 4-Methyl-N-(5-methyldihydrofuran-2(3H)-ylidene)benzenesulfonamide (**4a**)

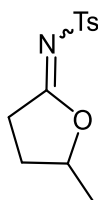

Sulfonyl carboximidate **4a** was prepared via GP2, using acyl sulfonamide **3a** (76 mg, 0.30 mmol) and **1** (4.6 mg, 0.0060 mmol), and the reaction was stirred for 1h. The crude product was purified via column chromatography (0-40% EtOAc in hexane, R<sub>f</sub> (40% EtOAc in hexanes = 0.3) to give **4a** (64.5 mg, 0.25 mmol, 85%) as a pale yellow oil. The product was isolated as an inseparable mixture of interconverting E/Z isomers. **4a** was also prepared according to GP3 in 82% yield.

**<sup>1</sup>H-NMR** (500 MHz, CDCl<sub>3</sub>): δ / ppm = 7.85 – 7.79 (m, 2H), 7.24 (d, 2H), 4.76 (dp, *J* = 10.0, 6.1 Hz, 1H), 2.39 (s, 3H), 2.11 (dd, *J* = 12.7, 5.8 Hz, 1H), 1.60 (dd, *J* = 12.8, 10.0 Hz, 1H), 1.36 (d, *J* = 6.2 Hz, 3H), 1.23 (d, *J* = 2.6 Hz, 6H). **<sup>13</sup>C-NMR** (126 MHz, CDCl<sub>3</sub>): δ / ppm = 187.1, 180.3, 143.5, 138.5, 129.5, 127.6, 127.0, 85.5, 81.2, 32.8, 30.8, 30.4, 29.4, 21.7, 20.6. **FT-IR** (neat):  $\tilde{\nu}$  / cm<sup>-1</sup> = 2980, 2933, 1620, 1152, 1090, 812, 762, 580. **HRMS** (ESI) *m/z* calc. for C<sub>12</sub>H<sub>16</sub>NO<sub>3</sub>S: 254.0845, found: 254.0846 (M+H)<sup>+</sup>.

### (*Z*)-4-Methyl-N-(3-methyl-2-oxaspiro[4.5]decan-1-ylidene)benzenesulfonamide (**4b**)

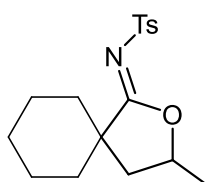

The title compound was prepared via general procedure 2, using acyl sulfonamide **3b** (96.4 mg, 0.300 mmol) and the reaction was stirred for 1h. The crude product was purified via column chromatography (0-40% EtOAc in hexane,  $R_f$  (40% EtOAc in hexanes) = 0.4) to give **4b** (69.3 mg, 0.216 mmol, 72%) as pale yellow crystals. **4b** was also prepared according to GP3 in 72% yield.

**<sup>1</sup>H-NMR** (400 MHz, CDCl<sub>3</sub>):  $\delta$  / ppm = 7.85 – 7.79 (m, 2H), 7.26 – 7.22 (m, 2H), 4.74 (dp,  $J$  = 9.6, 6.2 Hz, 1H), 2.40 – 2.35 (m, 3H), 2.35 (dd,  $J$  = 12.9, 6.2 Hz, 1H), 1.78 (td,  $J$  = 13.1, 3.8 Hz, 1H), 1.72 – 1.66 (m, 2H), 1.64 – 1.54 (m, 2H), 1.54 – 1.40 (m, 3H), 1.36 (d,  $J$  = 6.2 Hz, 3H), 1.35 – 1.08 (m, 3H). **<sup>13</sup>C-NMR** (101 MHz, CDCl<sub>3</sub>):  $\delta$  / ppm = 179.9, 143.0, 138.8, 129.0, 127.4, 81.7, 49.6, 40.1, 34.9, 32.6, 25.0, 22.3, 21.6, 20.9. **FT-IR** (neat):  $\tilde{\nu}$  / cm<sup>-1</sup> = 2931, 1619, 1317, 1156, 1091, 804, 784, 689, 572. **HRMS** (ESI)  $m/z$  calc. for C<sub>17</sub>H<sub>23</sub>NNaO<sub>3</sub>S: 344.1291, found: 344.1294 (M+Na)<sup>+</sup>.

#### (*Z*)-4-Methyl-*N*-(3-methyl-2-oxaspiro[4.4]nonan-1-ylidene)benzenesulfonamide (**4c**)

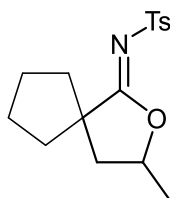

The title compound was prepared via general procedure 2, using acyl sulfonamide **3c** (92.0 mg, 0.300 mmol) and the reaction was stirred for 4h. The crude product was purified via column chromatography (0-40% EtOAc in hexane,  $R_f$  (40% EtOAc in hexanes) = 0.35) to give **4c** (76.0 mg, 0.247 mmol, 82%) as a pale-yellow oil. **4c** was also prepared according to GP3 in 87% yield.

**<sup>1</sup>H-NMR** (400 MHz, CDCl<sub>3</sub>):  $\delta$  / ppm = 7.85 – 7.76 (m, 2H), 7.25 – 7.20 (m, 2H), 4.71 (dp,  $J$  = 9.6, 6.1 Hz, 1H), 2.38 (s, 3H), 2.15 (dd,  $J$  = 12.7, 5.8 Hz, 2H), 1.86 – 1.72 (m, 3H), 1.75 – 1.65 (m, 1H), 1.66 – 1.51 (m, 4H), 1.35 (d,  $J$  = 6.3 Hz, 3H). **<sup>13</sup>C-NMR** (101 MHz, CDCl<sub>3</sub>):  $\delta$  / ppm = 180.7, 143.0, 138.8, 129.0, 127.4, 81.9, 54.9, 44.3, 38.7, 37.8, 25.5, 25.3, 21.6, 20.4. **FT-IR** (neat):  $\tilde{\nu}$  / cm<sup>-1</sup> = 2955, 2870, 1617, 1316, 1302, 1155, 1087, 804, 786, 727, 581. **HRMS** (ESI)  $m/z$  calc. for C<sub>16</sub>H<sub>22</sub>NO<sub>3</sub>S: 308.1315, found: 308.1316 (M+H)<sup>+</sup>.



**(Z)-4-Methyl-N-(7-methyl-6-oxaspiro[3.4]octan-5-ylidene)benzenesulfonamide (4d)**

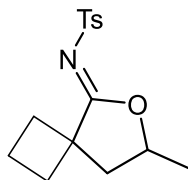

The title compound was prepared via general procedure 2, using acyl sulfonamide **3d** (88.6 mg, 0.300 mmol) and the reaction was stirred for 1h. The crude product was purified via column chromatography (0-40% EtOAc in hexane,  $R_f$  (40% EtOAc in hexanes) = 0.4) to give **4d** (69.1 mg, 0.236 mmol, 79%) as a pale-yellow oil. **4d** was also prepared according to GP3 in 70% yield.

**$^1\text{H-NMR}$**  (400 MHz,  $\text{CDCl}_3$ ):  $\delta$  / ppm = 7.90 – 7.83 (m, 2H), 7.26 (dt,  $J$  = 7.9, 0.7 Hz, 2H), 4.70 (dp,  $J$  = 8.5, 6.2 Hz, 1H), 2.62 – 2.51 (m, 1H), 2.47 – 2.35 (m, 5H), 2.10 – 1.88 (m, 2H), 1.83 (dd,  $J$  = 12.8, 8.5 Hz, 1H), 1.33 (d,  $J$  = 6.3 Hz, 3H).  **$^{13}\text{C-NMR}$**  (101 MHz,  $\text{CDCl}_3$ ):  $\delta$  / ppm = 13C NMR (126 MHz,  $\text{CDCl}_3$ )  $\delta$  178.8, 143.2, 138.7, 129.1, 127.6, 81.6, 49.0, 43.0, 33.0, 30.5, 21.6, 20.5, 16.2. **FT-IR** (neat):  $\tilde{\nu}$  /  $\text{cm}^{-1}$  = 2935, 1619, 1317, 1154, 1087, 803, 785, 653, 577. **HRMS** (ESI)  $m/z$  calc. for  $\text{C}_{15}\text{H}_{20}\text{NO}_3\text{S}$ : 294.1158, found: 294.1166 ( $\text{M}+\text{H}$ ) $^+$ .

**4-Methyl-N-(6-methyl-5-oxaspiro[2.4]heptan-4-ylidene)benzenesulfonamide (4e)**

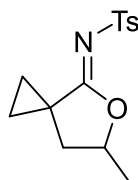

The title compound was prepared via general procedure 2, using acyl sulfonamide **3e** (83.8 mg, 0.300 mmol) and the reaction was stirred for 1h. The crude product was purified via column chromatography (0-40% EtOAc in hexane,  $R_f$  (30% EtOAc in hexanes) = 0.35) to give

**4e** (66.3 mg, 0.237 mmol, 79%) as a pale-yellow oil. **4e** was also prepared according to GP3 in 81% yield.

**<sup>1</sup>H-NMR** (400 MHz, CDCl<sub>3</sub>): δ / ppm = 7.79 (d, *J* = 8.3 Hz, 2H), 7.23 (d, *J* = 7.8 Hz, 2H), 4.95 (ddt, *J* = 13.6, 7.3, 6.3 Hz, 1H), 2.38 (s, 3H), 2.25 (dd, *J* = 12.6, 7.3 Hz, 1H), 1.88 (dd, *J* = 12.6, 7.2 Hz, 1H), 1.37 (d, *J* = 6.3 Hz, 3H), 1.34 (dd, *J* = 6.8, 3.6 Hz, 1H), 1.27 (dd, *J* = 6.9, 3.6 Hz, 1H), 1.05 – 0.99 (m, 2H). **<sup>13</sup>C-NMR** (101 MHz, CDCl<sub>3</sub>): δ / ppm = 178.5, 143.0, 138.7, 129.0, 127.4, 82.3, 36.9, 24.9, 21.6, 21.0, 18.1, 16.8. **FT-IR** (neat):  $\tilde{\nu}$  / cm<sup>-1</sup> = 2981, 1611, 1449, 1381, 1316, 1170, 1035, 833, 789, 663, 554. **HRMS** (ESI) *m/z* calc. for C<sub>14</sub>H<sub>18</sub>NO<sub>3</sub>S: 280.1002, found: 280.1005 (M+H)<sup>+</sup>.

#### 4-Methyl-*N*-(4,4,5-trimethyldihydrofuran-2(3H)-ylidene)benzenesulfonamide (**4f**)

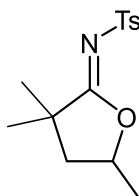

The title compound was prepared via general procedure 2, using acyl sulfonamide **3f** (84.0 mg, 0.300 mmol) and the reaction was stirred for 2h. The crude product was purified via column chromatography (0-60% EtOAc in hexane, *R<sub>f</sub>* (30% EtOAc in hexanes) = 0.3) to give **4f** (54.5 mg, 0.195 mmol, 65%) as a pale-yellow oil. **4g** was also prepared according to GP3 in 57% yield.

**<sup>1</sup>H-NMR** (500 MHz, CDCl<sub>3</sub>): δ / ppm = 7.84 (d, *J* = 8.3 Hz, 2H), 7.30 – 7.23 (m, 2H), 4.78 (dp, *J* = 10.0, 6.1 Hz, 1H), 2.40 (s, 3H), 2.12 (dd, *J* = 12.7, 5.8 Hz, 1H), 1.67 – 1.57 (m, 1H), 1.38 (d, *J* = 6.2 Hz, 3H), 1.25 (m, 6H). **<sup>13</sup>C-NMR** (101 MHz, CDCl<sub>3</sub>): δ / ppm = 180.0, 143.2, 138.7, 129.1, 127.6, 81.3, 45.1, 44.7, 25.9, 25.7, 21.7, 20.7. **FT-IR** (neat):  $\tilde{\nu}$  / cm<sup>-1</sup> = 2977, 2933, 1619, 1495, 1455, 1304, 1318, 1152, 805, 790, 665, 581. **HRMS** (ESI) *m/z* calc. for C<sub>14</sub>H<sub>20</sub>NO<sub>3</sub>S: 282.1158, found: 282.1167 (M+H)<sup>+</sup>.

**(Z)-4-Methyl-N-(5-methyl-3,3-diphenyldihydrofuran-2(3H)-ylidene)benzenesulfonamide (4g)**

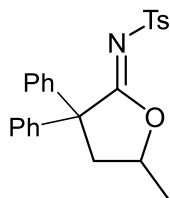

The title compound was prepared via general procedure 2, using acyl sulfonamide **3g** (121 mg, 0.300 mmol) and the reaction was stirred for 4h. The crude product was purified via column chromatography (0-40% EtOAc in hexane,  $R_f$  (40% EtOAc in hexanes) = 0.4) to give **4g** (81.0 mg, 0.200 mmol, 67%) as a pale-yellow oil. **4g** was also prepared according to GP3 in 65% yield.

**$^1\text{H-NMR}$**  (400 MHz,  $\text{CDCl}_3$ ):  $\delta$  / ppm = 7.82 (d,  $J$  = 8.4 Hz, 2H), 7.30 (m, 5H), 7.27 – 7.22 (m, 5H), 7.19 (m, 2H), 4.76 – 4.62 (m, 1H), 2.97 (dd,  $J$  = 13.0, 4.6 Hz, 1H), 2.54 (dd,  $J$  = 13.0, 10.6 Hz, 1H), 2.41 (s, 2H), 1.48 (d,  $J$  = 6.1 Hz, 2H).  **$^{13}\text{C-NMR}$**  (101 MHz,  $\text{CDCl}_3$ ):  $\delta$  / ppm = 175.5, 143.2, 141.7, 140.1, 138.8, 129.1, 129.0, 128.2, 128.2, 128.0, 127.6, 127.4, 127.4, 80.9, 61.4, 45.7, 21.7, 19.9. **FT-IR** (neat):  $\tilde{\nu}$  /  $\text{cm}^{-1}$  = 3060, 2980, 1625, 1598, 1446, 1319, 1156, 1987, 849, 782, 730, 541. **HRMS** (ESI)  $m/z$  calc. for  $\text{C}_{24}\text{H}_{24}\text{NO}_3\text{S}$ : 406.1471, found: 406.1478 ( $\text{M}+\text{H}$ ) $^+$ .

**(Z)-4-Methyl-N-(3-methyl-2,8-dioxaspiro[4.5]decan-1-ylidene)benzenesulfonamide (4h)**

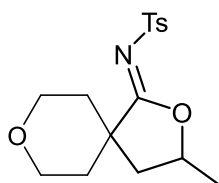

The title compound was prepared via general procedure 2, using acyl sulfonamide **3h** (97.2 mg, 0.300 mmol) and the reaction was stirred for 1h. The crude product was purified via

column chromatography (0-40% EtOAc in hexane,  $R_f$  (40% EtOAc in hexanes) = 0.3) to give **4h** (94.0 mg, 0.291 mmol, 97%) as a pale-yellow powder. **4h** was also prepared according to GP3 in 68% yield.

**$^1\text{H-NMR}$**  (400 MHz,  $\text{CDCl}_3$ ):  $\delta$  / ppm = 7.83 (d,  $J$  = 8.3 Hz, 2H), 7.26 (dd,  $J$  = 8.7, 0.7 Hz, 2H), 4.83 (dp,  $J$  = 9.8, 6.2 Hz, 1H), 3.93 (ddt,  $J$  = 19.0<sub>[d9]</sub>, 12.0, 4.2 Hz, 2H), 3.50 (ddd,  $J$  = 12.0, 10.5, 2.8 Hz, 1H), 3.38 (ddd,  $J$  = 11.8, 10.7, 2.8 Hz, 1H), 2.45 (dd,  $J$  = 12.9, 6.0 Hz, 1H), 2.40 (s, 3H), 2.10 (ddd,  $J$  = 13.7, 10.7, 4.4 Hz, 1H), 1.86 (dddd,  $J$  = 13.6, 10.5, 4.3, 1.1 Hz, 1H), 1.63 (ddd,  $J$  = 13.0, 9.8, 1.1 Hz, 1H), 1.59 – 1.50 (m, 1H), 1.43 (m, 4H).  **$^{13}\text{C-NMR}$**  (101 MHz,  $\text{CDCl}_3$ ):  $\delta$  / ppm = 177.6, 143.3, 138.8, 129.2, 127.3, 81.4, 77.5, 77.2, 76.8, 64.1, 63.8, 46.8, 40.8, 34.5, 33.0, 21.6, 20.9. **FT-IR** (neat):  $\tilde{\nu}$  /  $\text{cm}^{-1}$  = 2954, 1621, 1317, 1156, 1087, 817, 805, 787, 574. **HRMS** (ESI)  $m/z$  calc. for  $\text{C}_{16}\text{H}_{21}\text{NNaO}_4\text{S}$ : 346.1084, found: 346.1091 ( $\text{M}+\text{Na}$ ) $^+$ .

#### **tert-Butyl (Z)-7-methyl-5-(tosylimino)-6-oxa-2-azaspiro[3.4]octane-2-carboxylate (4i)**

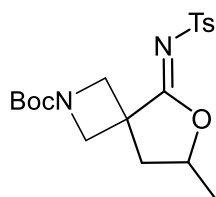

The title compound was prepared via general procedure 2, using acyl sulfonamide **3i** (118.8 mg, 0.300 mmol) and the reaction was stirred for 1h. The crude product was purified via column chromatography (0-40% EtOAc in hexane,  $R_f$  (60% EtOAc in hexanes) = 0.3) to give **4i** (74.7 mg, 0.188 mmol, 63%) as a pale-yellow oil.

**$^1\text{H-NMR}$**  (400 MHz,  $\text{CDCl}_3$ ):  $\delta$  / ppm = 7.87 – 7.83 (m, 2H), 7.28 (d,  $J$  = 7.9 Hz, 2H), 4.79 (dt,  $J$  = 8.1, 6.2 Hz, 1H), 4.27 (d,  $J$  = 8.4 Hz, 1H), 4.15 (d,  $J$  = 8.2 Hz, 1H), 3.87 – 3.80 (m, 2H), 2.60 (dd,  $J$  = 13.3, 6.2 Hz, 1H), 2.41 (s, 3H), 2.05 (dd,  $J$  = 13.3, 8.0 Hz, 1H), 1.40 (m, 12H).  **$^{13}\text{C-NMR}$**  (101 MHz,  $\text{CDCl}_3$ ):  $\delta$  / ppm = 175.1, 155.8, 143.7, 138.2, 129.3, 127.6, 81.9, 80.4, 43.8, 41.3, 28.4, 21.7, 20.6. **FT-IR** (neat):  $\tilde{\nu}$  /  $\text{cm}^{-1}$  = 2933, 1699, 1632, 1365, 1155, 1090, 813, 783, 728, 662, 579. **HRMS** (ESI)  $m/z$  calc. for  $\text{C}_{19}\text{H}_{26}\text{N}_2\text{NaO}_5\text{S}$ : 417.1455, found: 417.1456 ( $\text{M}+\text{Na}$ ) $^+$ .

**tert-Butyl (Z)-3-methyl-1-(tosylimino)-2-oxa-8-azaspiro[4.5]decane-8-carboxylate (4j)**

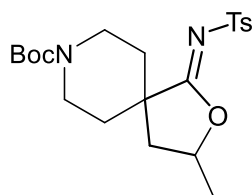

The title compound was prepared via general procedure 2, using acyl sulfonamide **3j** (127 mg, 0.300 mmol) and the reaction was stirred for 1h. The crude product was purified via column chromatography (0-40% EtOAc in hexane,  $R_f$  (40% EtOAc in hexanes) = 0.28) to give **4j** (91.0 mg, 0.215 mmol, 72%) as a pale-yellow oil. **4j** was also prepared according to GP3 in 61% yield.

**$^1\text{H-NMR}$**  (400 MHz,  $\text{CDCl}_3$ ):  $\delta$  / ppm = 7.84 (d,  $J$  = 8.3 Hz, 2H), 7.27 (d,  $J$  = 9.2 Hz, 2H), 4.84 (dt,  $J$  = 9.7, 6.1 Hz, 1H), 3.96 (bs, 1H), 2.98 (t,  $J$  = 12.3 Hz, 1H), 2.86 (t,  $J$  = 12.4 Hz, 1H), 2.42 (s, 3H), 2.37 (dd,  $J$  = 12.9, 6.0 Hz, 1H), 1.96 (ddd,  $J$  = 13.5, 11.0, 4.4 Hz, 1H), 1.75 (ddd,  $J$  = 14.4, 10.6, 4.3 Hz, 1H), 1.58 (dd,  $J$  = 11.9, 7.7 Hz, 1H), 1.46 (d,  $J$  = 6.3 Hz, 3H), 1.43 (s, 9H).  **$^{13}\text{C-NMR}$**  (101 MHz,  $\text{CDCl}_3$ ):  $\delta$  / ppm = 177.7, 154.5, 143.4, 138.7, 129.3, 127.4, 81.5, 80.1, 47.6, 40.4, 34.2, 32.5, 28.5, 21.7, 21.0. **FT-IR** (neat):  $\tilde{\nu}$  /  $\text{cm}^{-1}$  = 2932, 1687, 1625, 1423, 1319, 1155, 818, 787, 574. **HRMS** (ESI)  $m/z$  calc. for  $\text{C}_{21}\text{H}_{31}\text{N}_2\text{O}_5\text{S}$ : 423.1948, found: 423.1945 ( $\text{M}+\text{H}$ ) $^+$ .

**N-(4,5-Dimethyldihydrofuran-2(3H)-ylidene)-4-methylbenzenesulfonamide (4k)**

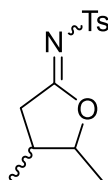

The title compound was prepared via general procedure 2, using acyl sulfonamide **3k** (80.2 mg, 0.300 mmol) and the reaction was stirred for 1h. The crude product was purified via

column chromatography (0-40% EtOAc in hexane,  $R_f$  (30% EtOAc in hexanes) = 0.30) to give two separable diastereomeric products **4k** (66.0 mg, 0.247 mmol, 82%, 1.2:1 dr) as pale-yellow oils. The products was isolated as an inseparable mixture of imine E/Z isomers.

*Major diastereomer:*

**$^1\text{H-NMR}$**  (500 MHz,  $\text{CDCl}_3$ ):  $\delta$  / ppm = 7.82 (d,  $J$  = 8.1 Hz, 2H), 7.27 (d,  $J$  = 8.1 Hz, 2H), 4.39 (m, 0.3H), 4.21 (m, 0.7H), 3.61 (dd,  $J$  = 18.5, 7.9 Hz, 0.7H), 2.84 (m, 0.3H), 2.73 (dd,  $J$  = 18.7, 10.3 Hz, 0.7H), 2.44 (m, 0.3H), 2.40 (m, 3H), 2.26 – 2.09 (m, 1H), 1.41 (m, 3H), 1.17 – 1.08 (m, 3H).  **$^{13}\text{C-NMR}$**  (126 MHz,  $\text{CDCl}_3$ ):  $\delta$  / ppm = 179.6, 143.5, 138.4, 129.5, 129.3, 127.6, 127.0, 90.8, 86.8, 40.6, 39.0, 38.7, 38.1, 21.6, 18.7, 16.2. **FT-IR** (neat):  $\tilde{\nu}$  /  $\text{cm}^{-1}$  = 2974, 1626, 1303, 1156, 848, 775, 582. **HRMS** (ESI)  $m/z$  calc. for  $\text{C}_{13}\text{H}_{18}\text{NO}_3\text{S}$ : 268.1002, found: 268.1002 ( $\text{M}+\text{H}$ ) $^+$ .

*Minor diastereomer:*

**$^1\text{H-NMR}$**  (500 MHz,  $\text{CDCl}_3$ ):  $\delta$  / ppm = 7.81 (m, 2H), 7.27 (m, 2H), 4.91 (bs, 0.3H), 4.74 (m, 0.6H), 3.32 (m, 0.6H), 3.03 (m, 0.6H), 2.96 – 2.85 (m, 0.3H), 2.65 (m, 0.6H), 2.55 (m, 0.3H), 2.39 (s, 3H), 1.28 (m, 3H), 1.06 – 0.91 (m, 3H).  **$^{13}\text{C-NMR}$**  (126 MHz,  $\text{CDCl}_3$ ):  $\delta$  / ppm = 179.9, 143.4, 138.5, 129.5, 129.2, 127.5, 127.0, 87.3, 83.2, 40.2, 38.3, 34.1, 33.3, 21.6, 15.1, 13.7. **FT-IR** (neat):  $\tilde{\nu}$  /  $\text{cm}^{-1}$  = 2974, 1617, 1312, 1301, 1151, 1076, 760, 581. **HRMS** (ESI)  $m/z$  calc. for  $\text{C}_{13}\text{H}_{18}\text{NO}_3\text{S}$ : 268.1002, found: 268.1001 ( $\text{M}+\text{H}$ ) $^+$ .

#### ***N*-(4,5-Dimethyldihydrofuran-2(3H)-ylidene)-4-phenylbenzenesulfonamide (4l)**

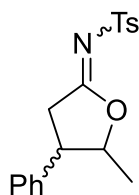

The title compound was prepared via general procedure 2, using acyl sulfonamide **3l** (98.8 mg, 0.300 mmol) and the reaction was stirred for 1h. The crude product was purified via column chromatography (0-40% EtOAc in hexane,  $R_f$  (25% EtOAc in hexanes) = 0.30) to give two separable diastereomeric products **4l** (65.0 mg, 0.207 mmol, 65%, 1.3:1 dr) as pale-yellow oils. The products were isolated as an inseparable mixture of imine E/Z isomers.

*Major diastereomer:* [d11]

**<sup>1</sup>H-NMR** (500 MHz, CDCl<sub>3</sub>): δ / ppm = 7.95 – 7.85 (m, 2H), 7.30 (m, 5H), 7.07 – 6.84 (m, 2H), 5.16 (m, 0.4H[d12]), 5.00 (m, 0.6H), 3.79 (m, 0.6H), 3.63 (m, 1.6H), 3.21 (m, 0.3H), 2.97 (m, 0.3H), 2.42 (s, 3H), 1.01 (d, *J* = 7.0 Hz, 3H). **<sup>13</sup>C-NMR** (126 MHz, CDCl<sub>3</sub>): δ / ppm = δ 180.0, 143.6, 138.4, 136.8, 129.6, 129.3, 129.0, 127.9, 127.8, 127.1, 87.8, 83.5, 45.6, 45.1, 39.1, 36.7, 21.7, 16.4. **FT-IR** (neat):  $\tilde{\nu}$  / cm<sup>-1</sup> = 2928, 1627, 1302, 1154, 1091, 1068, 779, 699, 583. **HRMS** (ESI) *m/z* calc. for C<sub>18</sub>H<sub>20</sub>NO<sub>3</sub>S: 330.1158, found: 330.1157 (M+H)<sup>+</sup>.

*Minor diastereomer:*

**<sup>1</sup>H-NMR** (500 MHz, CDCl<sub>3</sub>): δ / ppm = 7.85 (m, 2H), 7.36 – 7.28 (m, 5H), 7.25 – 7.17 (m, 2H), 4.82 (m, 0.3H), 4.64 (m, 0.6H), 3.90 (m, 0.6H), 3.36 – 2.99 (m, 1.4H), 2.42 (s, 3H), 1.45 (m, 3H). **<sup>13</sup>C-NMR** (126 MHz, CDCl<sub>3</sub>): δ / ppm = 178.7, 143.6, 138.3, 137.1, 129.6, 129.4, 128.3, 127.7, 127.4, 127.1, 90.5, 86.4, 50.4, 49.5, 40.8, 38.8, 21.7, 18.9. **FT-IR** (neat):  $\tilde{\nu}$  / cm<sup>-1</sup> = 2979, 1628, 1315, 1287, 1155, 1068, 779, 700, 583. **HRMS** (ESI) *m/z* calc. for C<sub>18</sub>H<sub>19</sub>NNaO<sub>3</sub>S: 352.0978, found: 352.0977 (M+Na)<sup>+</sup>.

#### (*Z*)-4-Methyl-*N*-(4,4,5-trimethyldihydrofuran-2(3H)-ylidene)benzenesulfonamide (**4m**)

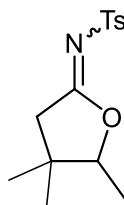

The title compound was prepared via general procedure 2, using acyl sulfonamide **3m** (84.0 mg, 0.300 mmol) and the reaction was stirred for 1h. The crude product was purified via column chromatography (0-40% EtOAc in hexane, *R<sub>f</sub>* (30% EtOAc in hexanes) = 0.3) to give **4m** (37.0 mg, 0.131 mmol, 44%) as a pale-yellow oil. The product was isolated as an inseparable mixture of imine E/Z isomers.

**<sup>1</sup>H-NMR** (400 MHz, CDCl<sub>3</sub>): δ / ppm = 7.81 (m, 2H), 7.26 (m, 2H), 4.47 (m, 0.3H), 4.31 (m, 0.6H), 3.28 (d, *J* = 18.1 Hz, 0.6H), 2.91 (d, *J* = 18.1 Hz[d13], 0.6H), 2.61 (d, *J* = 16.6 Hz, 0.3H), 2.54 – 2.45 (m, 0.3H), 2.40 (s, 3H), 1.27 (m, 3H), 1.21 – 1.06 (m, 3H), 1.00 (s, 2H), 0.89 (t, *J* = 7.1 Hz, 1H). **<sup>13</sup>C-NMR** (101 MHz, CDCl<sub>3</sub>): δ / ppm = 188.5, 179.5, 143.5, 138.5, 129.5, 129.2,

127.6, 127.0, 91.8, 88.0, 47.3, 45.5, 40.3, 26.8, 24.8, 24.6, 21.6, 21.4, 21.1, 20.9, 13.9. **FT-IR** (neat):  $\tilde{\nu}$  /  $\text{cm}^{-1}$  = 2966, 1619, 1430, 1345, 1165, 1086, 845, 660, 548. **HRMS** (ESI)  $m/z$  calc. for  $\text{C}_{14}\text{H}_{22}\text{NO}_3\text{S}$ : 284.1315, found: 284.1313 ( $\text{M}+\text{H}$ )<sup>+</sup>.

#### ***N*-(5,5-Dimethyldihydrofuran-2(3H)-ylidene)-4-methylbenzenesulfonamide (4n)**

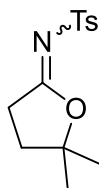

The title compound was prepared via general procedure 2, using acyl sulfonamide **3n** (80.2 mg, 0.300 mmol) and the reaction was stirred for 1h. The crude product was purified via column chromatography (0-40% EtOAc in hexane,  $R_f$  (30% EtOAc in hexanes) = 0.30) to give **4n** (43.7 mg, 0.164 mmol, 54%) as a pale-yellow oil. The product was isolated as an inseparable mixture of imine E/Z isomers.

**<sup>1</sup>H-NMR** (400 MHz,  $\text{CDCl}_3$ ):  $\delta$  / ppm = 7.82 (d,  $J$  = 7.9 Hz, 1H), 7.26 (d,  $J$  = 8.1 Hz, 1H), 3.38 – 3.31 (m, 1.4H), 2.83 (m, 0.6H), 2.39 (s, 3H), 2.22 – 1.89 (m, 2H), 1.43 (s, 3H). **<sup>13</sup>C-NMR** (101 MHz,  $\text{CDCl}_3$ ):  $\delta$  / ppm = 179.6, 143.4, 138.5, 129.4, 129.2, 127.7, 126.9, 89.6, 35.2, 34.3, 32.8, 30.9, 27.3, 21.6. **FT-IR** (neat):  $\tilde{\nu}$  /  $\text{cm}^{-1}$  = 2977, 1620, 1310, 1302, 1154, 1091, 737, 577. **HRMS** (ESI)  $m/z$  calc. for  $\text{C}_{13}\text{H}_{18}\text{NO}_3\text{S}$ : 268.1002, found: 268.1006 ( $\text{M}+\text{H}$ )<sup>+</sup>.

#### **4-Methyl-*N*-(6-methyltetrahydro-2H-pyran-2-ylidene)benzenesulfonamide (4o)**

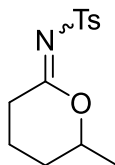

The title compound was prepared via general procedure 2, using acyl sulfonamide **3o** (80.2 mg, 0.300 mmol) and the reaction was stirred for 1h. The crude product was purified via



column chromatography (0-40% EtOAc in hexane,  $R_f$  (40% EtOAc in hexanes) = 0.4) to give **4o** (56.3 mg, 0.211 mmol, 70%) as a pale-yellow oil. The product was isolated as an inseparable mixture of imine E/Z isomers. **4o** was also prepared according to GP3 in 84% yield.

**$^1\text{H-NMR}$**  (400 MHz,  $\text{CDCl}_3$ ):  $\delta$  / ppm = 7.81 (d,  $J$  = 8.3 Hz, 1H), 7.24 (d,  $J$  = 8.0 Hz, 1H), 4.39 (ddp,  $J$  = 9.8, 6.3, 3.9, 3.3 Hz, 1H), 2.57 – 2.41 (m, 1H), 2.38 (s, 3H), 1.94 – 1.74 (m, 2H), 1.44 (m, 1H), 1.29 (d,  $J$  = 6.3 Hz, 3H).  **$^{13}\text{C-NMR}$**  (101 MHz,  $\text{CDCl}_3$ ):  $\delta$  / ppm = 171.2, 143.1, 138.9, 129.1, 127.6, 79.4, 29.0, 28.7, 21.6, 20.9, 17.3. **FT-IR** (neat):  $\tilde{\nu}$  /  $\text{cm}^{-1}$  = 2979, 1595, 1387, 1302, 1156, 788, 685, 542. **HRMS** (ESI)  $m/z$  calc. for  $\text{C}_{13}\text{H}_{18}\text{NO}_3\text{S}$ : 268.1002, found: 268.1002 ( $\text{M}+\text{H}$ ) $^+$ .

#### (Z)-4-Methyl-N-(3-methylisochroman-1-ylidene)benzenesulfonamide (**4p**)

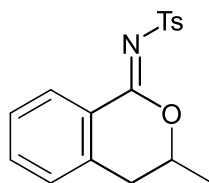

The title compound was prepared via general procedure 2, using acyl sulfonamide **3p** (94.6 mg, 0.300 mmol) and the reaction was stirred for 1h. The crude product was purified via column chromatography (0-40% EtOAc in hexane,  $R_f$  (30% EtOAc in hexanes) = 0.32) to give **4p** (75.0 mg, 0.238 mmol, 79%) as a pale-yellow oil. **4p** was also identically prepared on 1 mmol in 93% yield. **4p** was also prepared according to GP3 in 71% yield.

**$^1\text{H-NMR}$**  (400 MHz,  $\text{CDCl}_3$ ):  $\delta$  / ppm = 8.13 (dd,  $J$  = 7.9, 1.4 Hz, 1H), 7.92 (d,  $J$  = 8.3 Hz, 2H), 7.50 (td,  $J$  = 7.5, 1.4 Hz, 1H), 7.37 – 7.25 (m, 3H), 7.20 – 7.14 (m, 1H), 4.60 (dq,  $J$  = 9.7, 6.3, 4.8 Hz, 1H), 2.99 – 2.83 (m, 2H), 2.42 (s, 3H), 1.45 (d,  $J$  = 6.3 Hz, 3H).  **$^{13}\text{C-NMR}$**  (101 MHz,  $\text{CDCl}_3$ ):  $\delta$  / ppm = 163.2, 143.1, 139.3, 137.8, 134.3, 130.2, 129.1, 127.9, 127.8, 127.8, 125.0, 77.2, 34.3, 21.7, 20.2. **FT-IR** (neat):  $\tilde{\nu}$  /  $\text{cm}^{-1}$  = 3065, 2981, 1611, 1589, 1562, 1315, 1300, 1158, 1132, 773, 552. **HRMS** (ESI)  $m/z$  calc. for  $\text{C}_{17}\text{H}_{18}\text{NO}_3\text{S}$ : 316.1002, found: 316.1007 ( $\text{M}+\text{H}$ ) $^+$ .

**(Z)-4-methyl-N-(3-methyl-3,4-dihydro-1H-pyrrolo[2,1-c][1,4]oxazin-1-ylidene)benzenesulfonamide (4q)**

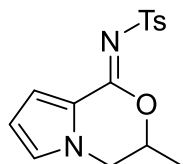

The title compound was prepared via general procedure 2, using acyl sulfonamide **3q** (91.3 mg, 0.300 mmol) and the reaction was stirred for 1h. The crude product was purified via column chromatography (0-60% EtOAc in hexane,  $R_f$  (50% EtOAc in hexanes) = 0.30) to give **4q** (79.4 mg, 0.261 mmol, 87%) as pale-yellow crystals.

**$^1\text{H-NMR}$**  (400 MHz,  $\text{CDCl}_3$ ):  $\delta$  / ppm = 7.93 – 7.88 (m, 2H), 7.26 (m, 2H), 7.14 (dd,  $J$  = 4.1, 1.5 Hz, 1H), 6.86 (dd,  $J$  = 2.5, 1.5 Hz, 1H), 6.28 (dd,  $J$  = 4.1, 2.5 Hz, 1H), 4.71 (dq,  $J$  = 9.8, 6.4, 3.3 Hz, 1H), 4.12 (dd,  $J$  = 13.2, 3.3 Hz, 1H), 3.90 (dd,  $J$  = 13.2, 9.9 Hz, 1H), 2.41 (s, 3H), 1.45 (d,  $J$  = 6.5 Hz, 3H).  **$^{13}\text{C-NMR}$**  (101 MHz,  $\text{CDCl}_3$ ):  $\delta$  / ppm = 156.7, 142.9, 139.7, 129.1, 127.7, 126.7, 119.2, 118.5, 111.9, 75.7, 48.5, 21.7, 17.6. **FT-IR** (neat):  $\tilde{\nu}$  /  $\text{cm}^{-1}$  = 3123, 1565, 1479, 1311, 1112, 1085, 807, 789, 579. **HRMS** (ESI)  $m/z$  calc. for  $\text{C}_{15}\text{H}_{17}\text{N}_2\text{O}_3\text{S}$ : 305.0954, found: 305.0952 ( $\text{M}+\text{H}$ ) $^+$ .

**4-Methyl-N-(4-methyl-1,3-dioxan-2-ylidene)benzenesulfonamide (4r)**

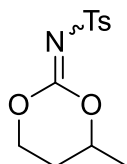

The title compound was prepared via general procedure 2, using acyl sulfonamide **3r** (80.8 mg, 0.300 mmol) and the reaction was stirred for 1h. The crude product was purified via

column chromatography (0-40% EtOAc in hexane,  $R_f$  (40% EtOAc in hexanes) = 0.4) to give **4r** (42.0 mg, 0.156 mmol, 2%) as a pale-yellow oil.

**$^1\text{H-NMR}$**  (500 MHz,  $\text{CDCl}_3$ ):  $\delta$  / ppm = 7.90 (d,  $J$  = 8.4 Hz, 2H), 7.30 (d,  $J$  = 7.9 Hz, 2H), 4.87 – 4.68 (m, 1H), 4.46 – 4.37 (m, 1H), 4.33 – 4.27 (m, 1H), 2.41 (s, 3H), 2.36 – 2.14 (m, 1H), 1.87 (ddd,  $J$  = 14.4, 2.8, 0.5 Hz, 1H), 1.51 (d,  $J$  = 6.5 Hz, 3H).  **$^{13}\text{C-NMR}$**  (126 MHz,  $\text{CDCl}_3$ ):  $\delta$  / ppm = 148.6, 145.0, 136.0, 129.4, 129.1, 77.4, 77.2, 76.9, 64.4, 51.1, 28.8, 21.7, 21.1. **FT-IR** (neat):  $\tilde{\nu}$  /  $\text{cm}^{-1}$  = 2961, 1750, 1445, 1160, 1089, 844, 662, 547. **HRMS** (ESI)  $m/z$  calc. for  $\text{C}_{12}\text{H}_{16}\text{NO}_4\text{S}$ : 270.0795, found: 270.0797 ( $\text{M}+\text{H}$ ) $^+$ .

#### 4-Methyl-1-tosylazetid-2-one (**4s**)

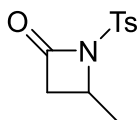

The title compound was prepared via general procedure 2, using acyl sulfonamide **3s** (71.1 mg, 0.300 mmol) and the reaction was stirred for 1h. The crude product was purified via column chromatography (0-40% EtOAc in hexane,  $R_f$  (40% EtOAc in hexanes) = 0.32) to give **4s** (21.4 mg, 0.0894 mmol, 30%) as off-white crystals.

**$^1\text{H-NMR}$**  (400 MHz,  $\text{CDCl}_3$ ):  $\delta$  / ppm = 7.88 (d,  $J$  = 8.3 Hz, 2H), 7.35 (d,  $J$  = 7.9 Hz, 2H), 4.17 (td,  $J$  = 6.1, 3.3 Hz, 1H), 3.12 (dd,  $J$  = 15.9, 6.0 Hz, 1H), 2.62 (dd,  $J$  = 15.9, 3.3 Hz, 1H), 2.45 (s, 3H), 1.52 (d,  $J$  = 6.1 Hz, 3H).  **$^{13}\text{C-NMR}$**  (101 MHz,  $\text{CDCl}_3$ ):  $\delta$  / ppm = 163.7, 145.3, 136.4, 130.2, 127.5, 51.4, 44.2, 21.8, 20.0. **FT-IR** (neat):  $\tilde{\nu}$  /  $\text{cm}^{-1}$  = 2978, 1785, 1359, 1167, 1135, 1090, 673. **HRMS** (ESI)  $m/z$  calc. for  $\text{C}_{11}\text{H}_{14}\text{NO}_3\text{S}$ : 240.0689, found: 240.0690 ( $\text{M}+\text{H}$ ) $^+$ .

#### (Z)-N-(5-Ethyldihydrofuran-2(3H)-ylidene)-4-methylbenzenesulfonamide (**4t**)

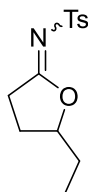

The title compound was prepared via general procedure 2, using acyl sulfonamide **3t** (80.2 mg, 0.300 mmol) and the reaction was stirred for 1h. The crude product was purified via column chromatography (0-40% EtOAc in hexane,  $R_f$  (40% EtOAc in hexanes) = 0.3) to give **4t** (25.4 mg, 0.0935 mmol, 31%) as a pale-yellow oil and **4o** (20.4 mg, 0.0748 mmol, 25%). The products were isolated as an inseparable mixture of imine E/Z isomers.

**<sup>1</sup>H-NMR** (500 MHz, CDCl<sub>3</sub>):  $\delta$  / ppm = 7.86 – 7.78 (m, 2H), 7.32 – 7.24 (m, 2H), 4.73 (m, 0.3H), 4.54 (m, 0.6H), 3.44 (m, 0.6H), 3.13 (m, 0.6H), 2.78 (m, 0.7H), 2.41 (brs, 3H), 1.91 (m, 0.3H), 1.78 – 1.61 (m, 3H), 0.97 (m, 3H). **<sup>13</sup>C-NMR** (126 MHz, CDCl<sub>3</sub>):  $\delta$  / ppm = 13C NMR (126 MHz, CDCl<sub>3</sub>)  $\delta$  180.4, 143.5, 138.5, 129.8, 129.5, 129.3, 127.7, 127.1, 126.6, 90.4, 86.2, 32.6, 30.6, 28.3, 28.1, 27.1, 21.7, 21.7, 9.7, 9.4. **FT-IR** (neat):  $\tilde{\nu}$  / cm<sup>-1</sup> = 2970, 2939, 1622, 1314, 1302, 1154, 818, 757, 691, 582. **HRMS** (ESI)  $m/z$  calc. C<sub>13</sub>H<sub>18</sub>NO<sub>3</sub>S: 268.1002, found: 268.1000 (M+H)<sup>+</sup>.

#### (Z)-4-Methyl-N-(6-phenyltetrahydro-2H-pyran-2-ylidene)benzenesulfonamide (**4u**)

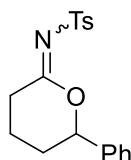

The title compound was prepared via general procedure 2, using acyl sulfonamide **3u** (98.8 mg, 0.300 mmol) and the reaction was stirred for 1h. The crude product was purified via column chromatography (0-40% EtOAc in hexane,  $R_f$  (40% EtOAc in hexanes) = 0.3) to give **4u** (72.0 mg, 0.219 mmol, 73%) as a pale-yellow oil.

**<sup>1</sup>H-NMR** (600 MHz, CDCl<sub>3</sub>):  $\delta$  / ppm = 7.75 (m, 2H), 7.41 – 7.32 (m, 3H), 7.24 (brs, 2H), 7.13 (brs, 2H), 5.32 (dd,  $J$  = 10.6, 3.5 Hz, 1H), 2.65 (m, 2H), 2.37 (s, 3H), 2.21 – 2.13 (m, 1H), 1.91 (m, 3H). **<sup>13</sup>C-NMR** (150 MHz, CDCl<sub>3</sub>):  $\delta$  / ppm = 170.5, 143.1, 138.8, 138.3, 129.2, 128.8, 128.8, 127.8, 126.0, 83.7, 30.1, 28.9, 21.7, 17.7. **FT-IR** (neat):  $\tilde{\nu}$  / cm<sup>-1</sup> = 3034, 2924, 1599, 1314, 1302, 1155, 699, 565. **HRMS** (ESI)  $m/z$  calc. for C<sub>18</sub>H<sub>23</sub>N<sub>2</sub>O<sub>3</sub>S: 347.1424, found: 347.1420 (M+NH<sub>4</sub>)<sup>+</sup>.

**4-Methyl-N-((Z)-5-((E)-prop-1-en-1-yl)dihydrofuran-2(3H)-ylidene)benzenesulfonamide (4v)**

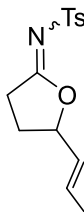

The title compound was prepared via general procedure 2, using acyl sulfonamide **4v** (98.8 mg, 0.300 mmol) and the reaction was stirred for 1h. The crude product was purified via column chromatography (0-40% EtOAc in hexane,  $R_f$  (40% EtOAc in hexanes) = 0.4) to give **4v** (36.7 mg, 0.131 mmol, 44%) as a pale-yellow oil. The product was isolated as an inseparable mixture of imine E/Z isomers. The product was contaminated with a small amount (<5%) of inseparable reduction product which has been accounted for in the yield calculation.

**$^1\text{H-NMR}$**  (500 MHz,  $\text{CDCl}_3$ ):  $\delta$  / ppm = 7.86 (d,  $J$  = 7.9 Hz, 2H), 7.34 – 7.27 (m, 2H), 5.86 (m, 1H), 5.50 (m, 1H), 5.26 – 4.89 (m, 1H), 3.44 (m, 0.6H), 3.26 – 3.04 (m, 0.6H), 2.80 (m, 0.6H), 2.43 (s, 4.2H), 2.14 – 1.85 (m, 1H), 1.76 – 1.74 (m, 3H).  **$^{13}\text{C-NMR}$**  (126 MHz,  $\text{CDCl}_3$ ):  $\delta$  / ppm = 180.2, 143.5, 138.5, 132.4, 132.1, 129.5, 127.7, 127.5, 127.2, 127.0, 88.9, 84.9, 37.1, 32.5, 30.6, 29.4, 28.4, 21.7, 17.8, 13.8. **FT-IR** (neat):  $\tilde{\nu}$  /  $\text{cm}^{-1}$  = 2923, 1625, 1343, 1155, 1094, 820, 769, 584. **HRMS** (ESI)  $m/z$  calc. for  $\text{C}_{14}\text{H}_{18}\text{NO}_3\text{S}$ : 280.1002, found: 280.1003 ( $\text{M}+\text{H}$ ) $^+$ .

**(Z)-N-(6,6-Diphenyltetrahydro-2H-pyran-2-ylidene)-4-methylbenzenesulfonamide (4w)**

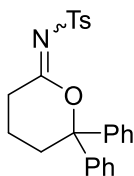

The title compound was prepared via general procedure 2, using acyl sulfonamide **3w** (121 mg, 0.300 mmol) and the reaction was stirred for 1h. The crude product was purified via column chromatography (0-40% EtOAc in hexane,  $R_f$  (40% EtOAc in hexanes) = 0.3) to give **4w** (86.2 mg, 0.212 mmol, 71%) as a pale-yellow oil.

**<sup>1</sup>H-NMR** (500 MHz, CDCl<sub>3</sub>):  $\delta$  / ppm = 7.90 – 7.83 (m, 2H), 7.36 – 7.29 (m, 10H), 7.25 – 7.17 (m, 2H), 2.57 (t,  $J$  = 6.8 Hz, 2H), 2.46 (d,  $J$  = 9.8 Hz, 2H), 2.42 (s, 3H), 1.88 (qd,  $J$  = 7.2, 6.3 Hz, 2H). **<sup>13</sup>C-NMR** (126 MHz, CDCl<sub>3</sub>):  $\delta$  / ppm = 170.4, 143.2, 142.4, 139.0, 129.3, 128.8, 128.1, 127.6, 125.9, 90.9, 33.0, 28.0, 21.7, 15.7. **FT-IR** (neat):  $\tilde{\nu}$  / cm<sup>-1</sup> = 3063, 2952, 1596, 1357, 1302, 1324, 1154, 1048, 853, 753, 582. **HRMS** (ESI)  $m/z$  calc. for C<sub>24</sub>H<sub>24</sub>NO<sub>3</sub>S: 406.1471, found: 406.1470 (M+H)<sup>+</sup>.

**(Z)-2,4,6-Triisopropyl-N-(5-methyldihydrofuran-2(3H)-ylidene)benzenesulfonamide (6a)**

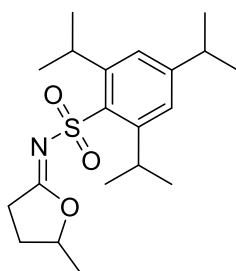

The title compound was prepared via general procedure 2, using acyl sulfonamide **5a** (109 mg, 0.300 mmol) and the reaction was stirred for 1h. The crude product was purified via column chromatography (0-60% EtOAc in hexane,  $R_f$  (20% EtOAc in hexanes) = 0.3) to give **6a** (95.2 mg, 0.260 mmol, 87%) as a pale-yellow oil. The product was isolated as an inseparable mixture of imine E/Z isomers.

**<sup>1</sup>H-NMR** (400 MHz, CDCl<sub>3</sub>):  $\delta$  / ppm = 7.12 (m, 2H), 4.76 (m, 1H), 4.25 (m, 2H), 3.34 (m, 0.5H), 3.06 (dt,  $J$  = 18.8, 9.3 Hz, 0.5H), 2.88 (bp,  $J$  = 6.9 Hz, 1H), 2.83 – 2.70 (m, 1H), 2.42 (m, 0.5H), 2.29 (m, 0.5H), 1.96 – 1.81 (m, 0.5H), 1.79 – 1.64 (m, 0.5H), 1.43 (d,  $J$  = 6.2 Hz, 1.5H), 1.24 (d,  $J$  = 19.8 Hz, 20H). **<sup>13</sup>C-NMR** (101 MHz, CDCl<sub>3</sub>):  $\delta$  / ppm = 179.6, 173.4, 152.6, 152.4, 149.8, 135.3, 134.4, 123.5, 123.4, 84.9, 80.8, 34.3, 32.6, 30.5, 30.4, 29.7, 29.5, 29.4, 24.8, 24.8, 23.7, 20.6, 20.4. **FT-IR** (neat):  $\tilde{\nu}$  / cm<sup>-1</sup> = 2957, 1628, 1460, 1384, 1150, 1038, 843, 765, 580. **HRMS** (ESI)  $m/z$  calc. for C<sub>20</sub>H<sub>32</sub>NO<sub>3</sub>S: 366.2097, found: 366.2104 (M+H)<sup>+</sup>.

**(Z)-4-methoxy-N-(5-methyldihydrofuran-2(3H)-ylidene)benzenesulfonamide (6b)**

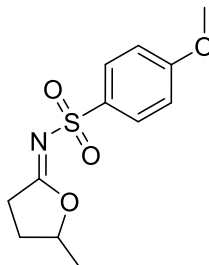

The title compound was prepared via general procedure 2, using acyl sulfonamide **7b** (80.8 mg, 0.300 mmol) and the reaction was stirred for 1h. The crude product was purified via column chromatography (0-60% EtOAc in hexane,  $R_f$  (30% EtOAc in hexanes) = 0.4) to give **6b** (70.7 mg, 0.263 mmol, 88%) as a pale-yellow oil. The product was isolated as an inseparable mixture of imine E/Z isomers.

**$^1\text{H-NMR}$**  (400 MHz,  $\text{CDCl}_3$ ):  $\delta$  / ppm = 7.85 (m,  $J = 8.9$  Hz,  $2\text{H}_{[d14]}$ ), 6.95 – 6.92 [ $d15$ ] (m, 2H), 4.90 (m, 0.3H), 4.72 (m, 0.6H), 3.83 (s, 3H), 3.41 (m, 0.6H), 3.14 – 3.05 (m, 0.6H), 2.77 (m, 0.6H), 2.35 (m, 1H), 1.87 – 1.74 (m, 1H), 1.40 (m, 3H).  **$^{13}\text{C-NMR}$**  (101 MHz,  $\text{CDCl}_3$ ):  $\delta$  / ppm = 180.1, 174.4, 163.0, 133.1, 129.7, 129.0, 114.0, 113.8, 85.5, 81.1, 55.7, 32.7, 30.7, 30.3, 29.3, 20.5. **FT-IR** (neat):  $\tilde{\nu}$  /  $\text{cm}^{-1}$  = 2936, 1619, 1594, 1497, 1295, 1147, 1089, 1022, 806, 575. **HRMS** (ESI)  $m/z$  calc. for  $\text{C}_{12}\text{H}_{16}\text{NO}_4\text{S}$ : 270.0795, found: 270.0799 ( $\text{M}+\text{H}$ ) $^+$ .

**(Z)-N-(5-Methyldihydrofuran-2(3H)-ylidene)methanesulfonamide (6c)**

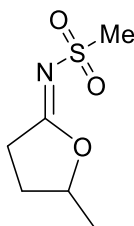

The title compound was prepared via general procedure 2, using acyl sulfonamide **5c** (53.8 mg, 0.300 mmol) and the reaction was stirred for 1h. The crude product was purified via column chromatography (0-40% EtOAc in hexane,  $R_f$  (40% EtOAc in hexanes) = 0.3) to give **6c** (47.0 mg, 0.265 mmol, 88%) as a pale-yellow oil. The product was isolated as an inseparable mixture of imine E/Z isomers.

**$^1\text{H-NMR}$**  (400 MHz,  $\text{CDCl}_3$ ):  $\delta$  / ppm = 4.98 – 4.96 (m, 0.3H), 4.77 – 4.74 (m, 0.6H), 3.31 (m, 0.6H), 3.12 – 3.04 (m, 0.6H), 3.01 (bs, 3H), 2.79 (m, 0.6H), 2.48 – 2.33 (m, 1H), 1.85 (m, 1H), 1.45 (m, 3H).  **$^{13}\text{C-NMR}$**  (101 MHz,  $\text{CDCl}_3$ ):  $\delta$  / ppm = 130.5, 126.1, 126.0, 125.9, 125.8, 125.7, 125.6, 125.5, 125.4, 125.3, 125.2, 125.1, 125.0, 124.9, 124.8, 124.7, 124.6, 124.5, 124.4, 124.3, 124.2, 124.1, 124.0, 123.9, 123.8, 123.7, 123.6, 123.5, 123.4, 123.3, 123.2, 123.1, 123.0, 122.9, 122.8, 122.7, 122.6, 122.5, 122.4, 122.3, 122.2, 122.1, 122.0, 121.9, 121.8, 121.7, 121.6, 121.5, 121.4, 121.3, 121.2, 121.1, 121.0, 120.9, 120.8, 120.7, 120.6, 120.5, 120.4, 120.3, 120.2, 120.1, 120.0, 119.9, 119.8, 119.7, 119.6, 119.5, 119.4, 119.3, 119.2, 119.1, 119.0, 118.9, 118.8, 118.7, 118.6, 118.5, 118.4, 118.3, 118.2, 118.1, 118.0, 117.9, 117.8, 117.7, 117.6, 117.5, 117.4, 117.3, 117.2, 117.1, 117.0, 116.9, 116.8, 116.7, 116.6, 116.5, 116.4, 116.3, 116.2, 116.1, 116.0, 115.9, 115.8, 115.7, 115.6, 115.5, 115.4, 115.3, 115.2, 115.1, 115.0, 114.9, 114.8, 114.7, 114.6, 114.5, 114.4, 114.3, 114.2, 114.1, 114.0, 113.9, 113.8, 113.7, 113.6, 113.5, 113.4, 113.3, 113.2, 113.1, 113.0, 112.9, 112.8, 112.7, 112.6, 112.5, 112.4, 112.3, 112.2, 112.1, 112.0, 111.9, 111.8, 111.7, 111.6, 111.5, 111.4, 111.3, 111.2, 111.1, 111.0, 110.9, 110.8, 110.7, 110.6, 110.5, 110.4, 110.3, 110.2, 110.1, 110.0, 109.9, 109.8, 109.7, 109.6, 109.5, 109.4, 109.3, 109.2, 109.1, 109.0, 108.9, 108.8, 108.7, 108.6, 108.5, 108.4, 108.3, 108.2, 108.1, 108.0, 107.9, 107.8, 107.7, 107.6, 107.5, 107.4, 107.3, 107.2, 107.1, 107.0, 106.9, 106.8, 106.7, 106.6, 106.5, 106.4, 106.3, 106.2, 106.1, 106.0, 105.9, 105.8, 105.7, 105.6, 105.5, 105.4, 105.3, 105.2, 105.1, 105.0, 104.9, 104.8, 104.7, 104.6, 104.5, 104.4, 104.3, 104.2, 104.1, 104.0, 103.9, 103.8, 103.7, 103.6, 103.5, 103.4, 103.3, 103.2, 103.1, 103.0, 102.9, 102.8, 102.7, 102.6, 102.5, 102.4, 102.3, 102.2, 102.1, 102.0, 101.9, 101.8, 101.7, 101.6, 101.5, 101.4, 101.3, 101.2, 101.1, 101.0, 100.9, 100.8, 100.7, 100.6, 100.5, 100.4, 100.3, 100.2, 100.1, 100.0, 99.9, 99.8, 99.7, 99.6, 99.5, 99.4, 99.3, 99.2, 99.1, 99.0, 98.9, 98.8, 98.7, 98.6, 98.5, 98.4, 98.3, 98.2, 98.1, 98.0, 97.9, 97.8, 97.7, 97.6, 97.5, 97.4, 97.3, 97.2, 97.1, 97.0, 96.9, 96.8, 96.7, 96.6, 96.5, 96.4, 96.3, 96.2, 96.1, 96.0, 95.9, 95.8, 95.7, 95.6, 95.5, 95.4, 95.3, 95.2, 95.1, 95.0, 94.9, 94.8, 94.7, 94.6, 94.5, 94.4, 94.3, 94.2, 94.1, 94.0, 93.9, 93.8, 93.7, 93.6, 93.5, 93.4, 93.3, 93.2, 93.1, 93.0, 92.9, 92.8, 92.7, 92.6, 92.5, 92.4, 92.3, 92.2, 92.1, 92.0, 91.9, 91.8, 91.7, 91.6, 91.5, 91.4, 91.3, 91.2, 91.1, 91.0, 90.9, 90.8, 90.7, 90.6, 90.5, 90.4, 90.3, 90.2, 90.1, 90.0, 89.9, 89.8, 89.7, 89.6, 89.5, 89.4, 89.3, 89.2, 89.1, 89.0, 88.9, 88.8, 88.7, 88.6, 88.5, 88.4, 88.3, 88.2, 88.1, 88.0, 87.9, 87.8, 87.7, 87.6, 87.5, 87.4, 87.3, 87.2, 87.1, 87.0, 86.9, 86.8, 86.7, 86.6, 86.5, 86.4, 86.3, 86.2, 86.1, 86.0, 85.9, 85.8, 85.7, 85.6, 85.5, 85.4, 85.3, 85.2, 85.1, 85.0, 84.9, 84.8, 84.7, 84.6, 84.5, 84.4, 84.3, 84.2, 84.1, 84.0, 83.9, 83.8, 83.7, 83.6, 83.5, 83.4, 83.3, 83.2, 83.1, 83.0, 82.9, 82.8, 82.7, 82.6, 82.5, 82.4, 82.3, 82.2, 82.1, 82.0, 81.9, 81.8, 81.7, 81.6, 81.5, 81.4, 81.3, 81.2, 81.1, 81.0, 80.9, 80.8, 80.7, 80.6, 80.5, 80.4, 80.3, 80.2, 80.1, 80.0, 79.9, 79.8, 79.7, 79.6, 79.5, 79.4, 79.3, 79.2, 79.1, 79.0, 78.9, 78.8, 78.7, 78.6, 78.5, 78.4, 78.3, 78.2, 78.1, 78.0, 77.9, 77.8, 77.7, 77.6, 77.5, 77.4, 77.3, 77.2, 77.1, 77.0, 76.9, 76.8, 76.7, 76.6, 76.5, 76.4, 76.3, 76.2, 76.1, 76.0, 75.9, 75.8, 75.7, 75.6, 75.5, 75.4, 75.3, 75.2, 75.1, 75.0, 74.9, 74.8, 74.7, 74.6, 74.5, 74.4, 74.3, 74.2, 74.1, 74.0, 73.9, 73.8, 73.7, 73.6, 73.5, 73.4, 73.3, 73.2, 73.1, 73.0, 72.9, 72.8, 72.7, 72.6, 72.5, 72.4, 72.3, 72.2, 72.1, 72.0, 71.9, 71.8, 71.7, 71.6, 71.5, 71.4, 71.3, 71.2, 71.1, 71.0, 70.9, 70.8, 70.7, 70.6, 70.5, 70.4, 70.3, 70.2, 70.1, 70.0, 69.9, 69.8, 69.7, 69.6, 69.5, 69.4, 69.3, 69.2, 69.1, 69.0, 68.9, 68.8, 68.7, 68.6, 68.5, 68.4, 68.3, 68.2, 68.1, 68.0, 67.9, 67.8, 67.7, 67.6, 67.5, 67.4, 67.3, 67.2, 67.1, 67.0, 66.9, 66.8, 66.7, 66.6, 66.5, 66.4, 66.3, 66.2, 66.1, 66.0, 65.9, 65.8, 65.7, 65.6, 65.5, 65.4, 65.3, 65.2, 65.1, 65.0, 64.9, 64.8, 64.7, 64.6, 64.5, 64.4, 64.3, 64.2, 64.1, 64.0, 63.9, 63.8, 63.7, 63.6, 63.5, 63.4, 63.3, 63.2, 63.1, 63.0, 62.9, 62.8, 62.7, 62.6, 62.5, 62.4, 62.3, 62.2, 62.1, 62.0, 61.9, 61.8, 61.7, 61.6, 61.5, 61.4, 61.3, 61.2, 61.1, 61.0, 60.9, 60.8, 60.7, 60.6, 60.5, 60.4, 60.3, 60.2, 60.1, 60.0, 59.9, 59.8, 59.7, 59.6, 59.5, 59.4, 59.3, 59.2, 59.1, 59.0, 58.9, 58.8, 58.7, 58.6, 58.5, 58.4, 58.3, 58.2, 58.1, 58.0, 57.9, 57.8, 57.7, 57.6, 57.5, 57.4, 57.3, 57.2, 57.1, 57.0, 56.9, 56.8, 56.7, 56.6, 56.5, 56.4, 56.3, 56.2, 56.1, 56.0, 55.9, 55.8, 55.7, 55.6, 55.5, 55.4, 55.3, 55.2, 55.1, 55.0, 54.9, 54.8, 54.7, 54.6, 54.5, 54.4, 54.3, 54.2, 54.1, 54.0, 53.9, 53.8, 53.7, 53.6, 53.5, 53.4, 53.3, 53.2, 53.1, 53.0, 52.9, 52.8, 52.7, 52.6, 52.5, 52.4, 52.3, 52.2, 52.1, 52.0, 51.9, 51.8, 51.7, 51.6, 51.5, 51.4, 51.3, 51.2, 51.1, 51.0, 50.9, 50.8, 50.7, 50.6, 50.5, 50.4, 50.3, 50.2, 50.1, 50.0, 49.9, 49.8, 49.7, 49.6, 49.5, 49.4, 49.3, 49.2, 49.1, 49.0, 48.9, 48.8, 48.7, 48.6, 48.5, 48.4, 48.3, 48.2, 48.1, 48.0, 47.9, 47.8, 47.7, 47.6, 47.5, 47.4, 47.3, 47.2, 47.1, 47.0, 46.9, 46.8, 46.7, 46.6, 46.5, 46.4, 46.3, 46.2, 46.1, 46.0, 45.9, 45.8, 45.7, 45.6, 45.5, 45.4, 45.3, 45.2, 45.1, 45.0, 44.9, 44.8, 44.7, 44.6, 44.5, 44.4, 44.3, 44.2, 44.1, 44.0, 43.9, 43.8, 43.7, 43.6, 43.5, 43.4, 43.3, 43.2, 43.1, 43.0, 42.9, 42.8, 42.7, 42.6, 42.5, 42.4, 42.3, 42.2, 42.1, 42.0, 41.9, 41.8, 41.7, 41.6, 41.5, 41.4, 41.3, 41.2, 41.1, 41.0, 40.9, 40.8, 40.7, 40.6, 40.5, 40.4, 40.3, 40.2, 40.1, 40.0, 39.9, 39.8, 39.7, 39.6, 39.5, 39.4, 39.3, 39.2, 39.1, 39.0, 38.9, 38.8, 38.7, 38.6, 38.5, 38.4, 38.3, 38.2, 38.1, 38.0, 37.9, 37.8, 37.7, 37.6, 37.5, 37.4, 37.3, 37.2, 37.1, 37.0, 36.9, 36.8, 36.7, 36.6, 36.5, 36.4, 36.3, 36.2, 36.1, 36.0, 35.9, 35.8, 35.7, 35.6, 35.5, 35.4, 35.3, 35.2, 35.1, 35.0, 34.9, 34.8, 34.7, 34.6, 34.5, 34.4, 34.3, 34.2, 34.1, 34.0, 33.9, 33.8, 33.7, 33.6, 33.5, 33.4, 33.3, 33.2, 33.1, 33.0, 32.9, 32.8, 32.7, 32.6, 32.5, 32.4, 32.3, 32.2, 32.1, 32.0, 31.9, 31.8, 31.7, 31.6, 31.5, 31.4, 31.3, 31.2, 31.1, 31.0, 30.9, 30.8, 30.7, 30.6, 30.5, 30.4, 30.3, 30.2, 30.1, 30.0, 29.9, 29.8, 29.7, 29.6, 29.5, 29.4, 29.3, 29.2, 29.1, 29.0, 28.9, 28.8, 28.7, 28.6, 28.5, 28.4, 28.3, 28.2, 28.1, 28.0, 27.9, 27.8, 27.7, 27.6, 27.5, 27.4, 27.3, 27.2, 27.1, 27.0, 26.9, 26.8, 26.7, 26.6, 26.5, 26.4, 26.3, 26.2, 26.1, 26.0, 25.9, 25.8, 25.7, 25.6, 25.5, 25.4, 25.3, 25.2, 25.1, 25.0, 24.9, 24.8, 24.7, 24.6, 24.5, 24.4, 24.3, 24.2, 24.1, 24.0, 23.9, 23.8, 23.7, 23.6, 23.5, 23.4, 23.3, 23.2, 23.1, 23.0, 22.9, 22.8, 22.7, 22.6, 22.5, 22.4, 22.3, 22.2, 22.1, 22.0, 21.9, 21.8, 21.7, 21.6, 21.5, 21.4, 21.3, 21.2, 21.1, 21.0, 20.9, 20.8, 20.7, 20.6, 20.5, 20.4, 20.3, 20.2, 20.1, 20.0, 19.9, 19.8, 19.7, 19.6, 19.5, 19.4, 19.3, 19.2, 19.1, 19.0, 18.9, 18.8, 18.7, 18.6, 18.5, 18.4, 18.3, 18.2, 18.1, 18.0, 17.9, 17.8, 17.7, 17.6, 17.5, 17.4, 17.3, 17.2, 17.1, 17.0, 16.9, 16.8, 16.7, 16.6, 16.5, 16.4, 16.3, 16.2, 16.1, 16.0, 15.9, 15.8, 15.7, 15.6, 15.5, 15.4, 15.3, 15.2, 15.1, 15.0, 14.9, 14.8, 14.7, 14.6, 14.5, 14.4, 14.3, 14.2, 14.1, 14.0, 13.9, 13.8, 13.7, 13.6, 13.5, 13.4, 13.3, 13.2, 13.1, 13.0, 12.9, 12.8, 12.7, 12.6, 12.5, 12.4, 12.3, 12.2, 12.1, 12.0, 11.9, 11.8, 11.7, 11.6, 11.5, 11.4, 11.3, 11.2, 11.1, 11.0, 10.9, 10.8, 10.7, 10.6, 10.5, 10.4, 10.3, 10.2, 10.1, 10.0, 9.9, 9.8, 9.7, 9.6, 9.5, 9.4, 9.3, 9.2, 9.1, 9.0, 8.9, 8.8, 8.7, 8.6, 8.5, 8.4, 8.3, 8.2, 8.1, 8.0, 7.9, 7.8, 7.7, 7.6, 7.5, 7.4, 7.3, 7.2, 7.1, 7.0, 6.9, 6.8, 6.7, 6.6, 6.5, 6.4, 6.3, 6.2, 6.1, 6.0, 5.9, 5.8, 5.7, 5.6, 5.5, 5.4, 5.3, 5.2, 5.1, 5.0, 4.9, 4.8, 4.7, 4.6, 4.5, 4.4, 4.3, 4.2, 4.1, 4.0, 3.9, 3.8, 3.7, 3.6, 3.5, 3.4, 3.3, 3.2, 3.1, 3.0, 2.9, 2.8, 2.7, 2.6, 2.5, 2.4, 2.3, 2.2, 2.1, 2.0, 1.9, 1.8, 1.7, 1.6, 1.5, 1.4, 1.3, 1.2, 1.1, 1.0, 0.9, 0.8, 0.7, 0.6, 0.5, 0.4, 0.3, 0.2, 0.1, 0.0, -0.1, -0.2, -0.3, -0.4, -0.5, -0.6, -0.7, -0.8, -0.9, -1.0, -1.1, -1.2, -1.3, -1.4, -1.5, -1.6, -1.7, -1.8, -1.9, -2.0, -2.1, -2.2, -2.3, -2.4, -2.5, -2.6, -2.7, -2.8, -2.9, -3.0, -3.1, -3.2, -3.3, -3.4, -3.5, -3.6, -3.7, -3.8, -3.9, -4.0, -4.1, -4.2, -4.3, -4.4, -4.5, -4.6, -4.7, -4.8, -4.9, -5.0, -5.1, -5.2, -5.3, -5.4, -5.5, -5.6, -5.7, -5.8, -5.9, -6.0, -6.1, -6.2, -6.3, -6.4, -6.5, -6.6, -6.7, -6.8, -6.9, -7.0, -7.1, -7.2, -7.3, -7.4, -7.5, -7.6, -7.7, -7.8, -7.9, -8.0, -8.1, -8.2, -8.3, -8.4, -8.5, -8.6, -8.7, -8.8, -8.9, -9.0, -9.1, -9.2, -9.3, -9.4, -9.5, -9.6, -9.7, -9.8, -9.9, -10.0, -10.1, -10.2, -10.3, -10.4, -10.5, -10.6, -10.7, -10.8, -10.9, -11.0, -11.1, -11.2, -11.3, -11.4, -11.5, -11.6, -11.7, -11.8, -11.9, -12.0, -12.1, -12.2, -12.3, -12.4, -12.5, -12.6, -12.7, -12.8, -12.9, -13.0, -13.1, -13.2, -13.3, -13.4, -13.5, -13.6, -13.7, -13.8, -13.9, -14.0, -14.1, -14.2, -14.3, -14.4, -14.5, -14.6, -14.7, -14.8, -14.9, -15.0, -15.1, -15.2, -15.3, -15.4, -15.5, -15.6, -15.7, -15.8, -15.9, -16.0, -16.1, -16.2, -16.3, -16.4, -16.5, -16.6, -16.7, -16.8, -16.9, -17.0, -17.1, -17.2, -17.3, -17.4, -17.5, -17.6, -17.7, -17.8, -17.9, -18.0, -18.1, -18.2, -18.3, -18.4, -18.5, -18.6, -18.7, -18.8, -18.9, -19.0, -19.1, -19.2, -19.3, -19.4, -19.5, -19.6, -19.7, -19.8, -19.9, -20.0, -20.1, -20.2, -20.3, -20.4, -20.5, -20.6, -20.7, -20.8, -20.9, -21.0, -21.1, -21.2, -21.3, -21.4, -21.5, -21.6, -21.7, -21.8, -21.9, -22.0, -22.1, -22.2, -22.3, -22.4, -22.5, -22.6, -22.7, -22.8, -22.9, -23.0, -23.1, -23.2, -23.3, -23.4, -23.5, -23.6, -23.7, -23.8, -23.9, -24.0, -24.1, -24.2, -24.3, -24.4, -24.5, -24.6, -24.7, -24.8, -24.9, -25.0, -25.1, -25.2, -25.3, -25.4, -25.5, -25.6, -25.7, -25.8, -25.9, -26.0, -26.1, -26.2, -26.3, -26.4, -26.5, -26.6, -26.7, -26.8, -26.9, -27.0, -27.1, -27.2, -27.3, -27.4, -27.5, -27.6, -27.7, -27.8, -27.9, -28.0, -28.1, -28.2, -28.3, -28.4, -28.5, -28.6, -28.7, -28.8, -28.9, -29.0, -29.1, -29.2, -29.3, -29.4, -29.5, -29.6, -29.7, -29.8, -29.9, -30.0, -30.1, -30.2, -30.3, -30.4, -30.5, -30.6, -30.7, -30.8, -30.9, -31.0, -31.1, -31.2, -31.3, -31.4, -31.5, -31.6, -31.7, -31.8, -31.9, -32.0, -32.1, -32.2, -32.3, -32.4, -32.5, -32.6, -32.7, -32.8, -32.9, -33.0, -33.1, -33.2, -33.3, -33.4, -33.5, -33.6, -33.7, -33.8, -33.9, -34.0, -34.1, -34.2, -34.3, -34.4, -34.5, -34.6, -34.7, -34.8, -34.9, -35.0, -35.1, -35.2, -35.3, -35.4, -35.5, -35.6, -35.7, -35.8, -35.9, -36.0, -36.1, -36.2, -36.3, -36.4, -36.5, -36.6, -36.7, -36.8, -36.9, -37.0, -37.1, -37.2, -37.3, -37.4, -37.5, -37.6, -37.7, -37.8, -37.9, -38.0, -38.1, -38.2, -38.3, -38.4, -38.5, -38.6, -38.7, -38.8, -38.9, -39.0, -39.1, -39.2, -39.3, -39.4, -39.5, -39.6, -39.7, -39.8, -39.9, -40.0, -40.1, -40.2, -40.3, -40.4, -40.5, -40.6, -40.7, -40.8, -40.9, -41.0, -41.1, -41.2, -41.3, -41.4, -41.5, -41.6, -41.7, -41.8, -41.9, -42.0, -42.1, -42.2, -42.3, -42.4, -42.5, -42.6, -42.7, -42.8, -42.9, -43.0, -43.1, -43.2, -43.3, -43.4, -43.5, -43.6, -43.7, -43.8, -43.9, -44.0, -44.1, -44.2, -44.3, -44.4, -44.5, -44.6, -44.7, -44.8, -44.9, -45.0, -45.1, -45.2, -45.3, -45.4, -45.5, -45.6, -45.7, -45.8, -45.9, -46.0, -46.1, -46.2, -46.3, -46.4, -46.5, -46.6, -46.7, -46.8, -46.9, -47.0, -47.1, -47.2, -47.3, -47.4, -47.5, -47.6, -47.7, -47.8, -47.9, -48.0, -48.1, -48.2, -48.3, -48.4, -48.5, -48.6, -48.7, -48.8, -48.9, -49.0, -49.1, -49.2, -49.3, -49.4, -49.5, -49.6, -49.7, -49.8, -49.9, -50.0, -50.1, -50.2, -50.3, -50.4, -50.5, -50.6, -50.7, -50.8, -50.9, -51.0, -51.1, -51.2, -51.3, -51.4, -51.5, -51.6, -51.7, -51.8, -51.9, -52.0, -52.1, -52.2, -52.3, -52.4, -52.5, -52.6, -52.7, -52.8, -52.9, -53.0, -53.1, -53.2, -53.3, -53.4, -53.5, -53.6, -53.7, -53.8, -53.9, -54.0, -54.1, -54.2, -54.3, -54.4, -54.5, -54.6, -54.7, -54.8, -54.9, -55.0, -55.1, -55.2, -55.3, -55.4, -55.5, -55.6, -55.7, -55.8, -55.9, -56.0, -56.1, -56.2, -56.3, -56.4, -56.5, -56.6, -56.7, -56.8, -56.9, -57.0, -57.1, -57.2, -57.3, -57.4, -57.5, -57.6, -57.7, -57.8, -57.9, -58.0, -58.1, -58.2, -58.3, -58.4, -58.5, -58.6, -58.7, -58.8, -58.9, -59.0, -59.1, -59.2, -59.3, -59.4, -59.5, -59.6, -59.7, -59.8, -59.9, -60.0, -60.1, -60.2, -60.3, -60.4, -60.5, -60.6, -60.7, -60.8, -60.9, -61.0, -61.1, -61.2, -61.3, -61.4, -61.5, -61.6, -61.7, -61.8, -61.9, -62.0, -62.1, -62.2, -62.3, -62.4, -62.5, -62.6, -62.7, -62.8, -62.9, -63.0, -63.1, -63.2, -63.3, -63.4, -63.5, -63.6, -63.7, -63.8, -63.9, -64.0, -64.1, -64.2, -64.3, -64.4, -64.5, -64.6, -64.7, -64.8, -64.9, -65.0, -65.1, -65.2, -65.3, -65.4, -65.5, -65.6, -65.7, -65.8, -65.9, -66.0, -66.1, -66.2, -66.3, -66.4, -66.5, -66.6, -66.7, -66.8, -66.9, -67.0, -67.1, -67.2, -67.3, -67.4, -67.5, -67.6, -67.7, -67.8, -67.9, -68.0, -68.1, -68.2, -68.3, -68.4, -68.5, -68.6, -68.7, -68.8, -68.9, -69.0, -69.1, -69.2, -69.3, -69.4, -69.5, -69.6, -69.7, -69.8, -69.9, -70.0, -70.1, -70.2, -70.3, -70.4, -70.5, -70.6, -70.7, -70.8, -70.9, -71.0, -71.1, -71.2, -71.3, -71.4, -71.5, -71.6,



**5-methyl-1-((trifluoromethyl)sulfonyl)pyrrolidin-2-one** (<sub>[d20]6e</sub>)

**<sup>1</sup>H-NMR** (500 MHz, CDCl<sub>3</sub>): δ / ppm = 1H NMR (500 MHz, CDCl<sub>3</sub>) δ 4.49 (m, 1H), 2.75 (m, 1H), 2.59 (m, 1H), 2.40 (m, 1H), 1.87 (m, 1H), 1.50 (m, 3H). **<sup>13</sup>C-NMR** (126 MHz, CDCl<sub>3</sub>): δ / ppm = 172.6, 119.1 (q, *J* = 323 Hz), 77.4, 77.2, 76.9, 58.1, 30.5, 26.9, 21.5. **FT-IR** (neat):  $\tilde{\nu}$  / cm<sup>-1</sup> = 2993, 1770, 1403, 1134, 1068, 958, 714, 593. **HRMS** (ESI) *m/z* calc. for C<sub>6</sub>H<sub>8</sub>F<sub>3</sub>NNaO<sub>3</sub>S: 254.0069, found: 254.0074 (M+Na)<sup>+</sup>.

**(E)-2-methyl-N-(5-methyldihydrofuran-2(3H)-ylidene)propane-2-sulfinamide (6f)**

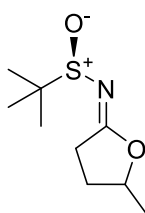

The title compound was prepared via general procedure 2, using acyl sulfonamide **5f** (70.5 mg, 0.300 mmol) and the reaction was stirred for 1h. The crude product was purified via column chromatography (0-5% MeOH in CH<sub>2</sub>Cl<sub>2</sub>, R<sub>f</sub> (2% MeOH in CH<sub>2</sub>Cl<sub>2</sub>) = 0.3) to give **6f** (35.0 mg, 0.148 mmol, 50%) as a pale-yellow oil. The product was isolated as an inseparable mixture of E/Z isomers of the imine and as a 2:1 mixture of diastereomers with respect to sulphur.<sub>[d21]</sub>

**<sup>1</sup>H-NMR** (500 MHz, CDCl<sub>3</sub>): δ / ppm = 4.85 – 4.70 (m, 0.3H), 4.68 – 4.55 (m, 0.6H), 3.28 (ddd, *J* = 17.7, 8.5, 4.0 Hz, 0.3H), 3.00 (dd, *J* = 9.7, 6.3 Hz, 0.6H), 2.85 – 2.67 (m, 1H), 2.33 (m, 1H), 1.79 (m, 1H), 1.41 (dd, *J* = 9.7, 6.2 Hz, 3H), 1.18 (s, 9H). **<sup>13</sup>C-NMR** (126 MHz, CDCl<sub>3</sub>): δ / ppm = 180.0, 179.6, 174.6, 174.6, 82.8, 82.7, 79.4, 79.4, 56.1, 56.0, 55.5, 55.4, 31.8, 31.0, 30.7, 30.2, 29.6, 28.8, 21.9, 21.9, 20.7, 20.6. **FT-IR** (neat):  $\tilde{\nu}$  / cm<sup>-1</sup> = 2977, 1633, 1184, 1076, 1050, 745, 549. **HRMS** (ESI) *m/z* calc. for C<sub>9</sub>H<sub>17</sub>NNaO<sub>2</sub>S: 226.0872, found: 226.0872 (M+Na)<sup>+</sup>.

**tert-Butyl 3-methylisothiazolidine-2-carboxylate 1,1-dioxide (6g)**

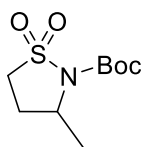

The title compound was prepared via general procedure 2, using acyl sulfonamide **5g** (70.5 mg, 0.300 mmol) and the reaction was stirred for 1h. The crude product was purified via column chromatography (0-5% MeOH in CH<sub>2</sub>Cl<sub>2</sub>, R<sub>f</sub> (2% MeOH in CH<sub>2</sub>Cl<sub>2</sub>) = 0.3) to give **6g** (35.0mg, 0.148 mmol, 50%) as a pale-yellow oil.

**<sup>1</sup>H-NMR** (400 MHz, CDCl<sub>3</sub>): δ / ppm = δ 4.28 – 4.17 (m, 1H), 3.44 – 3.30 (m, 1H), 3.33 – 3.18 (m, 1H), 2.53 (ddt, *J* = 13.6, 10.1, 7.1 Hz, 1H), 1.99 (dddd, *J* = 13.5, 6.8, 5.4, 3.9 Hz, 1H), 1.52 (d, *J* = 0.8 Hz, 9H), 1.39 (d, *J* = 6.3 Hz, 3H). **<sup>13</sup>C-NMR** (101 MHz, CDCl<sub>3</sub>): δ / ppm = 149.8, 84.1, 77.4, 77.2, 76.9, 53.1, 47.7, 28.2, 28.1, 25.7, 20.0. **FT-IR** (neat):  $\tilde{\nu}$  / cm<sup>-1</sup> = 2980, 1716, 1303, 1133, 1068, 837, 529. **HRMS** (ESI) *m/z* calc. for C<sub>9</sub>H<sub>17</sub>NNaO<sub>4</sub>S: 258.077, found: 258.0774 (M+Na)<sup>+</sup>.

### Unsuccessful substrates

Two benzamide substrates (N-acyl pentafluorobenzamide and N-acyl benzamide) were explored as potential substrates. However, neither of those substrates was conducive to this transformation under our conditions.

### Derivatizations<sub>[d22]</sub>

#### 3-Methylisochroman-1-one (7a)

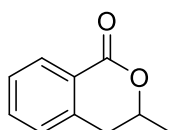

To a solution of sulfonyl carboximidate **4p** (65.0 mg, 0.206 mmol, 1.00 eq.) in DMF–H<sub>2</sub>O (95:5, 0.4 mL) was added DBU<sub>[d23]</sub> 9.43<sub>[d24]</sub> mg, 61.8 μmol, 0.300 eq.) and the mixture stirred at rt for 12h. The reaction mixture was then diluted with EtOAc (20 mL) and washed with water (3x 10 mL) and brine (10 mL). The organic phase was dried over Na<sub>2</sub>SO<sub>4</sub>, filtered and the solvent removed in vacuo. The crude product was purified via column chromatography (0-40% EtOAc in

hexane,  $R_f$  (40% EtOAc in hexanes = 0.3) to give **9a** (29.3 mg, 0.170 mmol, 82%) as a white solid. The spectra obtained were in accordance with the literature.<sup>17</sup>

### Methyl (*E*)-3-((*E*)-3-methyl-1-(tosylimino)isochroman-8-yl)acrylate (**7b**)

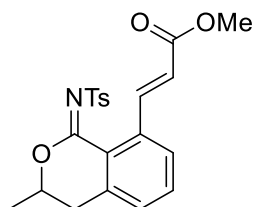

A 5 mL microwave vial equipped with a stirrer bar was charged with sulfonyl carboximidate **4p** (50.0 mg, 0.159 mmol, 1.00 eq), [Cp\* $\text{RhCl}_2$ ]<sub>2</sub> (2.45 mg, 3.96  $\mu\text{mol}$ , 2.5 mol%), AgSbF<sub>6</sub> (5.45 mg, 15.8  $\mu\text{mol}$ , 10 mol%), and Cu(OAc)<sub>2</sub> (14.4 mg, 79.3  $\mu\text{mol}$ , 50 mol%) under air, followed by addition of dioxane (1 mL) and methyl acrylate (40.9 mg, 0.476 mmol, 3.00 eq.). Then, the vial tube was sealed with [d<sub>25</sub>] and the reaction mixture was stirred at 120 °C for 12 h. Upon cooling to room temperature, the reaction mixture was diluted with 10 mL of ethyl acetate, filtered through a pad of silica gel, followed by washing with ethyl acetate (20 mL). Subsequently, the filtrate was concentrated in vacuo. The crude product was purified via column chromatography (0-40% EtOAc in hexane,  $R_f$  (40% EtOAc in hexanes = 0.4) to give **9b** (50.5 mg, 0.126 mmol, 80%) as a white solid.

**<sup>1</sup>H-NMR** (400 MHz, CDCl<sub>3</sub>):  $\delta$  / ppm = 8.32 (dt,  $J$  = 15.9, 0.6 Hz, 1H), 7.92 – 7.86 (m, 2H), 7.51 – 7.44 (m, 1H), 7.40 (ddd,  $J$  = 7.8, 1.4, 0.7 Hz, 1H), 7.28 – 7.20 (m, 3H), 6.10 (d,  $J$  = 15.8 Hz, 1H), 4.62 (dp,  $J$  = 8.1, 6.3 Hz, 1H), 3.69 (s, 3H), 2.99 – 2.90 (m, 2H), 2.39 (s, 3H), 1.56 (d,  $J$  = 6.3 Hz, 3H). **<sup>13</sup>C-NMR** (101 MHz, CDCl<sub>3</sub>):  $\delta$  / ppm = 166.6, 161.3, 144.8, 142.8, 139.6, 139.5, 138.1, 133.3, 129.1, 129.0, 128.9, 128.4, 128.2, 127.3, 127.2, 123.9, 120.2, 76.4, 51.7, 35.4, 21.6, 20.1. **FT-IR** (neat):  $\tilde{\nu}$  / cm<sup>-1</sup> = 2983, 2949, 1715, 1589, 1563, 1247, 1156, 1088, 989, 824, 689, 553. **HRMS** (ESI)  $m/z$  calc. for C<sub>21</sub>H<sub>22</sub>NO<sub>5</sub>S: 400.1213, found: 400.1213 (M+H)<sup>+</sup>.

### N-(2-(2-hydroxypropyl)benzyl)-4-methylbenzenesulfonamide (**7c**)

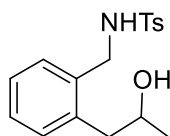

To a solution of sulfonyl carboximidate **4p** (44.0 mg, 0.140 mmol, 1.00 eq.) in MeOH (3 mL) was added NaBH<sub>4</sub> 42.4 [d26]mg, 1.26 mmol, 9 eq.) portion wise over 3h (every hour 3 eq. were added) and the reaction stirred until loss of starting material (TLC). The solvent was removed in vacuo, the residue dissolved in EtOAc (20 mL) and water (10 mL). The aqueous phase was extracted with EtOAc (2x 20 mL) and the combined organic phases washed with brine (10 mL). The organic phase was dried over Na<sub>2</sub>SO<sub>4</sub>, filtered and the solvent removed in vacuo. The crude product was purified via column chromatography (0-80% EtOAc in hexane, R<sub>f</sub> (60% EtOAc in hexanes = 0.35) to give **9c** (34.3 mg, 0.107 mmol, 77%) as a colourless oil.

**<sup>1</sup>H-NMR** (500 MHz, CDCl<sub>3</sub>): δ / ppm = 7.80 – 7.74 (m, 2H), 7.32 – 7.25 (m, 2H), 7.23 (dd, *J* = 6.2, 1.4 Hz, 1H), 7.16 – 7.06 (m, 3H), 6.40 (t, *J* = 5.6 Hz, 1H), 4.07 – 3.94 (m, 3H), 2.61 (dd, *J* = 14.0, 3.3 Hz, 1H), 2.48 – 2.39 (m, 4H), 2.33 (dt, *J* = 3.5, 1.0 Hz, 1H), 1.25 (d, *J* = 6.1 Hz, 3H). **<sup>13</sup>C-NMR** (126 MHz, CDCl<sub>3</sub>): δ / ppm = 143.4, 138.2, 136.8, 134.7, 130.8, 130.4, 129.7, 129.5, 128.5, 127.7, 127.5, 127.2, 126.9, 126.5, 69.7, 45.4, 40.9, 24.1, 21.7. **FT-IR** (neat):  $\tilde{\nu}$  / cm<sup>-1</sup> = 3491, 3275, 2927, 1155, 1092, 814, 660, 551. **HRMS** (ESI) *m/z* calc. for C<sub>17</sub>H<sub>22</sub>NO<sub>3</sub>S: 320.1315, found: 320.1315 (M+H)<sup>+</sup>.

## NMR experiments

NMR spectra of compound **4a** were obtained in the range of -60 °C to 100°C. At 40 °C coalescence of the two sets of signals was observed. Equation (1), derived from the Eyring equation provides a good estimate for the activation energy of isomerization.<sup>18,19</sup> From a coalescence temperature of 40°C and a  $\Delta\nu$  of 20.5 Hz we arrived at a value of 16.0 kcal mol<sup>-1</sup> for the  $\Delta G^\ddagger$  for the E/Z isomerization of the parent compound **4a**.

$$\Delta G^\ddagger = RT_c \left[ 22.96 + \ln \left( \frac{T_c}{\Delta\nu} \right) \right] \quad (1)$$

$$\Delta G^\ddagger = 66.8 \text{ kJ mol}^{-1}$$

$$\Delta G^\ddagger = 16.0 \text{ kcal mol}^{-1}$$

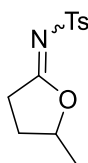

**4a**

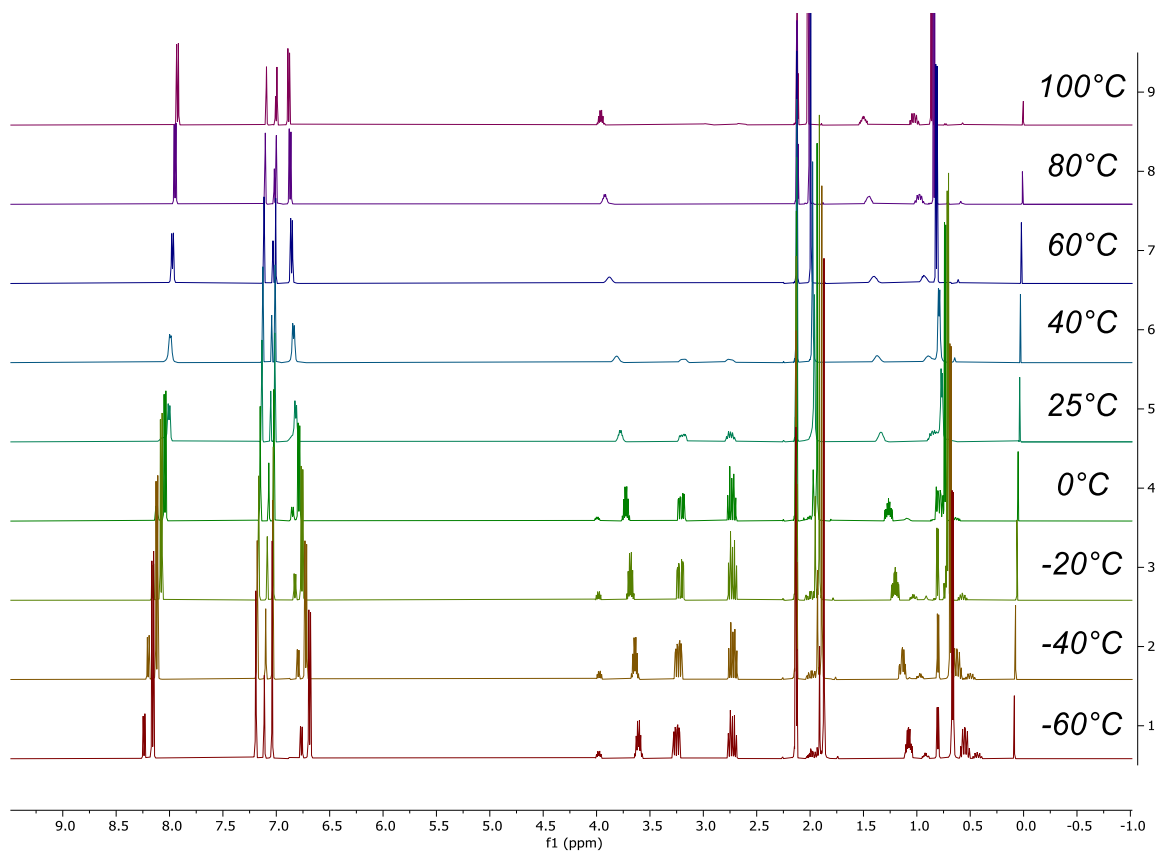

**<sup>1</sup>H NMR (400 MHz, toluene-d<sub>8</sub>) at indicated temperatures**

In order to determine the major isomer in solution at 25°C in toluene a low temperature NOESY was measured. A correlation between H<sub>a</sub> and H<sub>b</sub> allowed us to identify E as the major isomer.

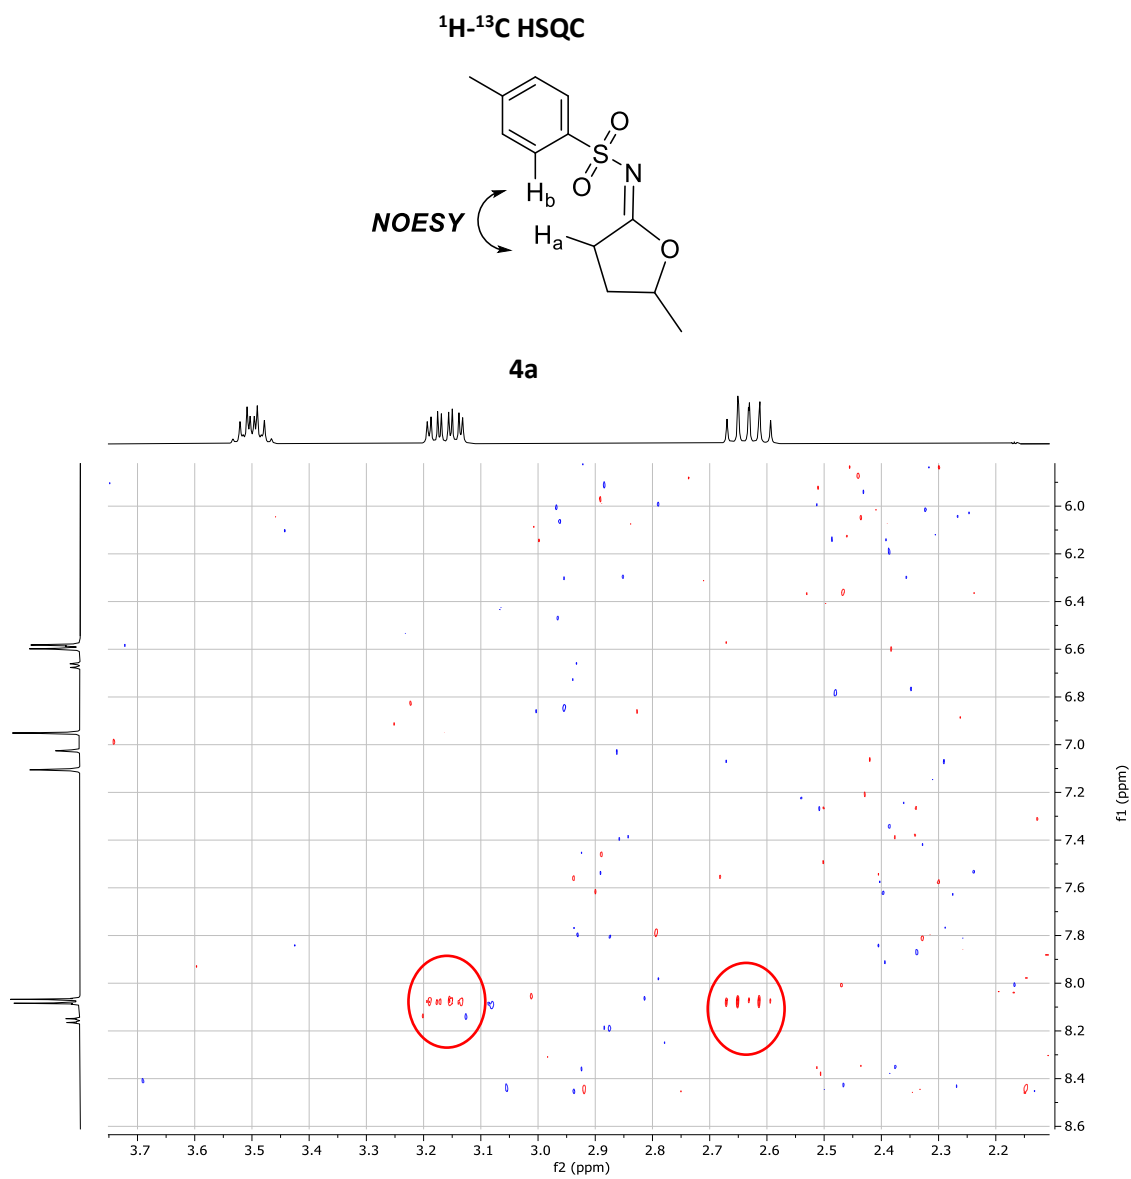

## Investigations of the reaction with *air*

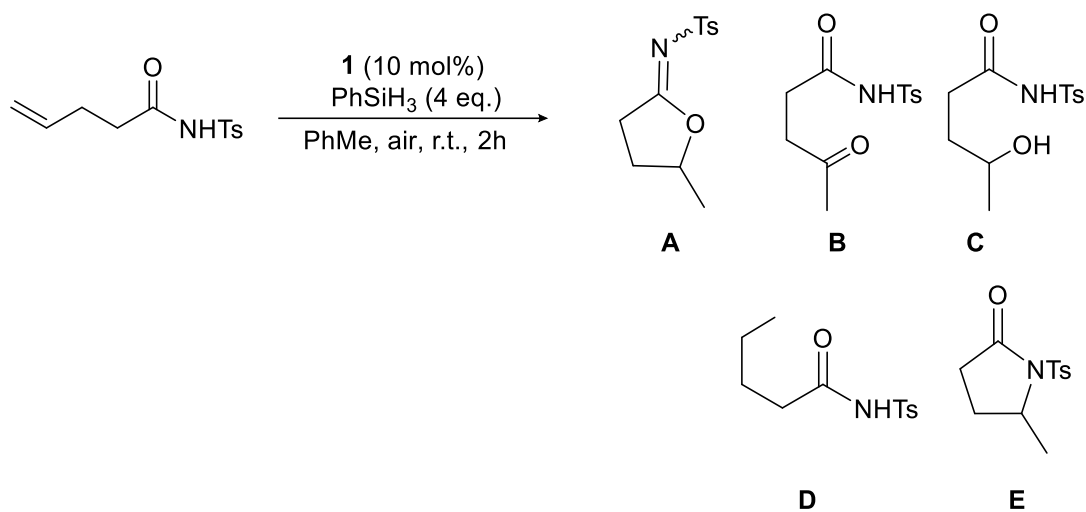

## Solvent screening

| Entry | Deviation from standard conditions              | A (%) | B (%) | C (%) | D (%) | E (%) |
|-------|-------------------------------------------------|-------|-------|-------|-------|-------|
| 1     | none                                            | 83    | 0     | 0     | 0     | 0     |
| 2     | THF instead of PhMe                             | 24    | 34    | 29    | 0     | 0     |
| 3     | CH <sub>2</sub> Cl <sub>2</sub> instead of PhMe | 83    | 0     | 0     | 0     | 0     |
| 4     | 2-MeTHF instead of PhMe                         | 37    | 23    | 29    | 0     | 0     |
| 5     | EtOH instead of PhMe                            | 36    | 21    | 30    | 0     | 0     |
| 6     | MeCN instead of PhMe                            | 31    | 22    | 18    | 0     | 0     |
| 7     | CHCl <sub>3</sub> instead of PhMe               | 67    | 0     | 0     | 0     | 0     |
| 8     | DMF instead of PhMe                             | 0     | 56    | 22    |       |       |
| 9     | PhH instead of PhMe                             | 75    | 0     | 0     | 0     | 0     |
| 10    | EtOAc instead of PhMe                           | 55    | 25    | 5     | 0     | 0     |
| 11    | PhOMe instead of PhMe                           | 63    | 13    | 10    | 0     | 0     |

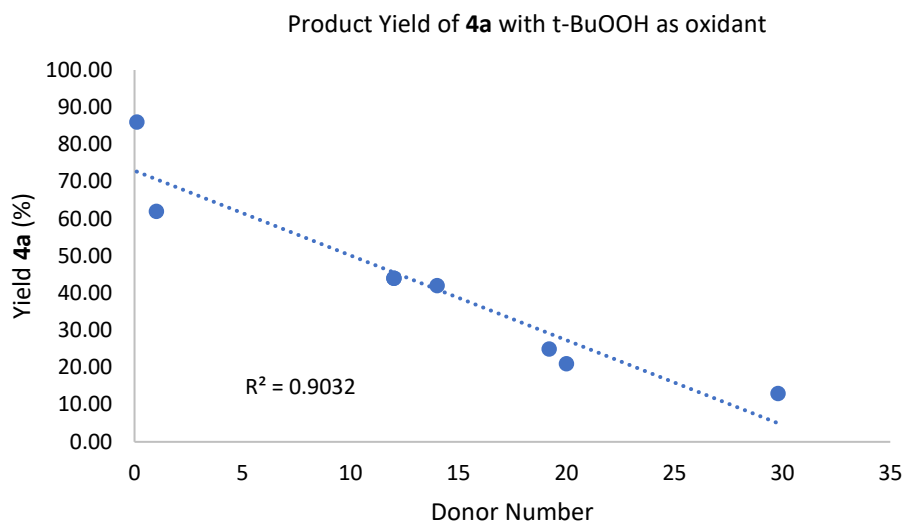

For the reaction with *t*-BuOOH protic solvents were excluded from the correlation plot since they led to product D.

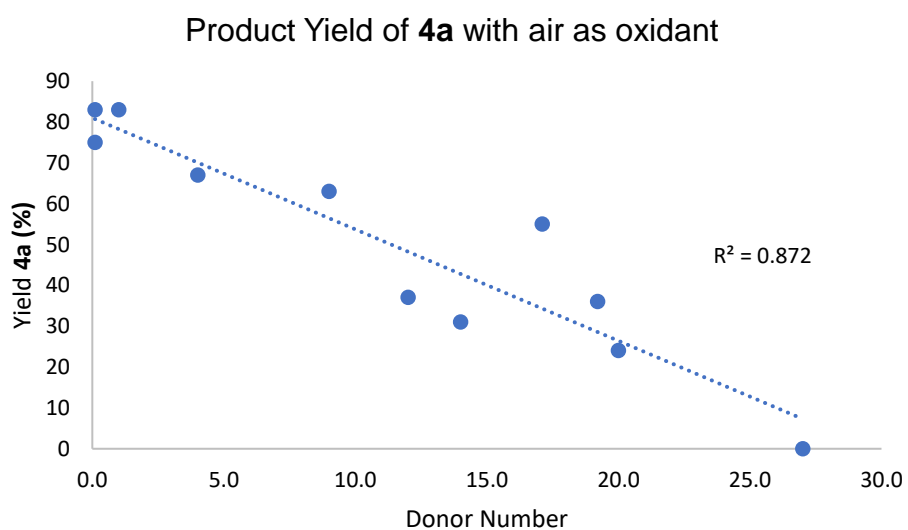



Product yield vs Viscosity with air as oxidant

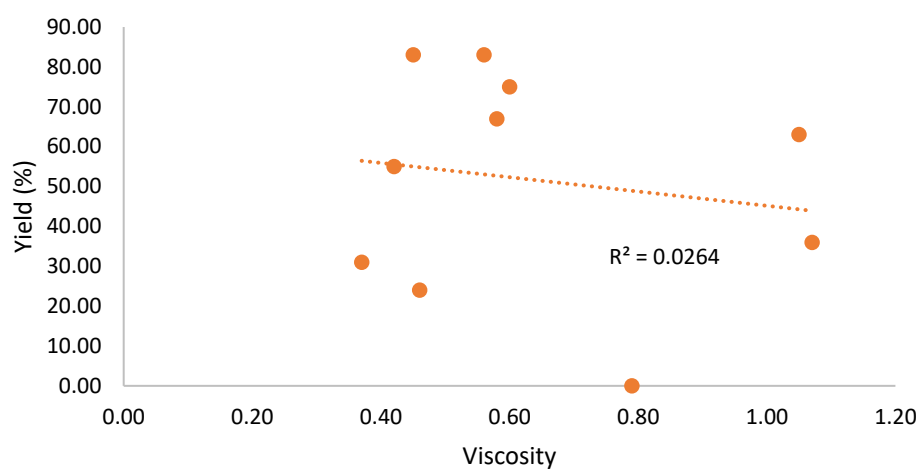

No correlation between viscosity<sup>20</sup> and product yield could be determined.

## Control experiments with Mukaiyama hydration conditions

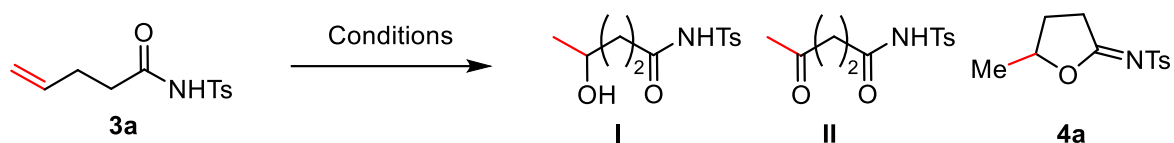

| Entry | Conditions                                                                                               | I (%) | II (%) | 4a (%) |
|-------|----------------------------------------------------------------------------------------------------------|-------|--------|--------|
| 1     | Co(acac) <sub>2</sub> (5 mol%), PhSiH <sub>3</sub> (2.5 eq.), O <sub>2</sub> (1 atm), THF (0.1 M), 12 h  | 46    | 4      | 0      |
| 2     | Co(acac) <sub>2</sub> (5 mol%), PhSiH <sub>3</sub> (2.5 eq.), O <sub>2</sub> (1 atm), PhMe (0.1 M), 12 h | 31    | 26     | 0      |
| 3     | <b>1</b> (2 mol%), PhSiH <sub>3</sub> (2.5 eq.), <i>t</i> -BuOOH (2.2 eq.), THF (0.1 M), 2 h             | 15    | 0      | 21     |
| 4     | <b>1</b> (2 mol%), PhSiH <sub>3</sub> (2.5 eq.), O <sub>2</sub> (1 atm), THF (0.1 M), 2 h                | 25    | 32     | 36     |

To a solution of **3a** (51.0 mg, 0.200 mmol, 1.0 eq.) and catalyst (5 mol%) under O<sub>2</sub> atmosphere (doubled toy balloon, atmosphere exchanges 3 times) was added respective solvent (2 mL) and PhSiH<sub>3</sub> (0.500 mmol, 2.5 eq.) and the reaction stirred at r.t. overnight. The solvent was then removed in vacuo. Purification using silica gel chromatography (0-40% EtOAc in hexane, R<sub>f</sub> (40% EtOAc in hexanes) = 0.3) gave product **4a**.

## Control experiments with Mukaiyama hydration conditions

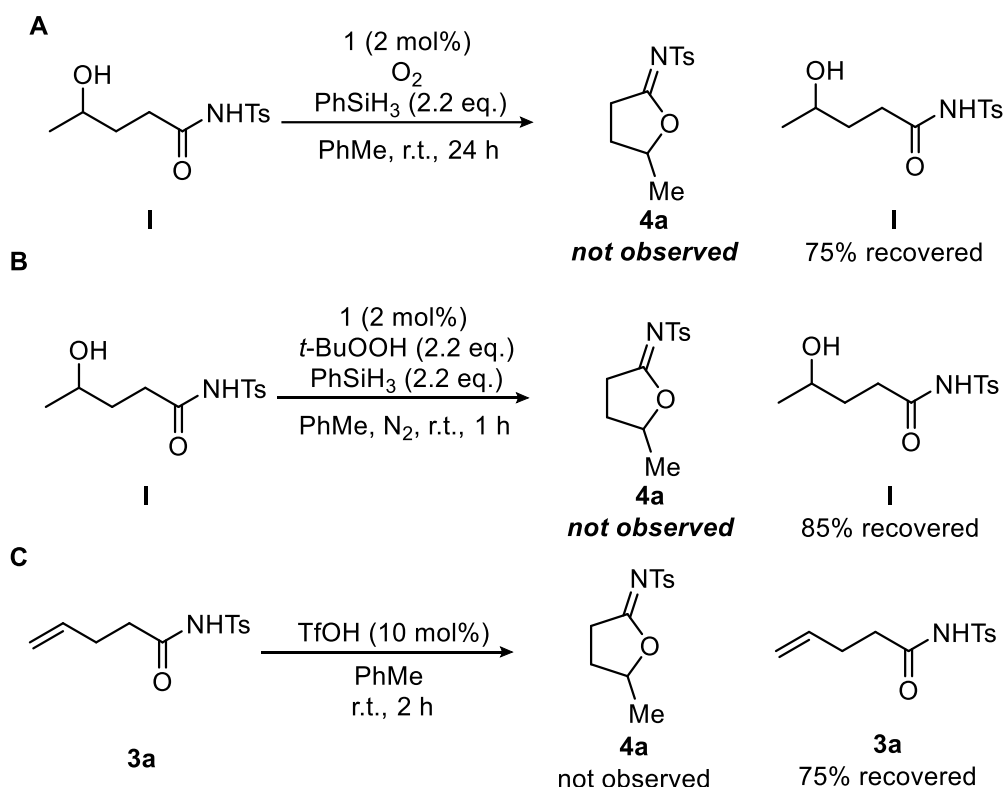

### A:

To a solution of **I** (54.3 mg, 0.200 mmol, 1.0 eq.) and catalyst (5 mol%) under O<sub>2</sub> atmosphere (doubled toy balloon, atmosphere exchanges 3 times) was added respective solvent (2 mL) and PhSiH<sub>3</sub> (0.500 mmol, 2.5 eq.) and the reaction stirred at r.t. overnight. The solvent was then removed in vacuo. Purification using silica gel chromatography (0-100% EtOAc in hexane, R<sub>f</sub> (60% EtOAc in hexanes = 0.3) gave starting material **I** (40.5 mg, 0.149 mmol, 75%).

### B:

**I** (54.3 mg, 0.200 mmol, 1.0 eq.) was subjected to GP2. Purification using silica gel chromatography (0-100% EtOAc in hexane, R<sub>f</sub> (60% EtOAc in hexanes = 0.3) gave starting material **I** (46.2 mg, 0.170 mmol, 85%).

### C:

To a solution of **3a** (50.4 mg, 0.200 mmol, 1.0 eq.) in toluene (2 mL) was added TfOH (0.500 mmol, 2.5 eq.) and the reaction stirred at r.t. for 2h. The reaction mixture was then diluted with

EtOAc (30 mL), washed with saturated aq. NaHCO<sub>3</sub> (20 mL) and brine (25 mL), dried using Na<sub>2</sub>SO<sub>4</sub>, filtered and the solvents removed in vacuo. The solvent was then removed in vacuo. Purification using silica gel chromatography (0-40% EtOAc in hexane, R<sub>f</sub> (40% EtOAc in hexanes = 0.3) gave starting material **3a** (38.1 mg, 0.150 mmol, 75%).

- (1) White, D. E.; Tadross, P. M.; Lu, Z.; Jacobsen, E. N. A Broadly Applicable and Practical Oligomeric (Salen)Co Catalyst for Enantioselective Epoxide Ring-Opening Reactions. *Tetrahedron* **2014**, *70* (27), 4165–4180.
- (2) Nicolai, S.; Piemontesi, C.; Waser, J. A Palladium-Catalyzed Aminoalkynylation Strategy towards Bicyclic Heterocycles: Synthesis of (±)-Trachelanthamidine. *Angew. Chem. Int. Ed.* **2011**, *50* (20), 4680–4683.
- (3) Gao, R.; Canney, D. J. A Modified Prins Reaction for the Facile Synthesis of Structurally Diverse Substituted 5-(2-Hydroxyethyl)-3,3-Dihydrofuran-2(3H)-Ones. *Tetrahedron Lett.* **2009**, *50* (43), 5914–5916.
- (4) Deng, X.; Zhang, L.; Liu, H.; Bai, Y.; He, W. MCPBA-Mediated Dioxygenation of Unactivated Alkenes for the Synthesis of 5-Imino-2-Tetrahydrofuran-1-yl Methanol Derivatives. *Tetrahedron Lett.* **2020**, *61* (50), 152620.
- (5) Ferrand, L.; Tang, Y.; Aubert, C.; Fensterbank, L.; Mouriès-Mansuy, V.; Petit, M.; Amatore, M. Niobium-Catalyzed Intramolecular Addition of O–H and N–H Bonds to Alkenes: A Tool for Hydrofunctionalization. *Org. Lett.* **2017**, *19* (8), 2062–2065.
- (6) Ji, Y.; Wojtas, L.; Lopchuk, J. M. An Improved, Gram-Scale Synthesis of Protected 3-Haloazetidines: Rapid Diversified Synthesis of Azetidine-3-Carboxylic Acids. *Arkivoc* **2018**, *2018* (4), 195–214.
- (7) Ferreira, A. J.; Solano, D. M.; Oakdale, J. S.; Kurth, M. J. Novel Trinitrogen-Containing Triheterocycles via the Intramolecular Nitrile Oxide Cycloaddition Reaction. *Synthesis* **2011**, *2011* (20), 3241–3246.
- (8) Liu, M.; Yang, P.; Karunananda, M. K.; Wang, Y.; Liu, P.; Engle, K. M. C(Alkenyl)–H Activation via Six-Membered Palladacycles: Catalytic 1,3-Diene Synthesis. *J. Am. Chem. Soc.* **2018**, *140* (17), 5805–5813.
- (9) Wu, L.; Qiu, S.; Liu, G. Brønsted Base-Modulated Regioselective Pd-Catalyzed Intramolecular Aerobic Oxidative Amination of Alkenes: Formation of Seven-Membered Amides and Evidence for Allylic C–H Activation. *Org. Lett.* **2009**, *11* (12), 2707–2710.
- (10) Pinho, P.; Minnaard, A. J.; Feringa, B. L. The Tandem Heck–Allylic Substitution Reaction: A Novel Route to Lactams. *Org. Lett.* **2003**, *5* (3), 259–261.
- (11) Denmark, S. E.; Chi, H. M. Lewis Base Catalyzed, Enantioselective, Intramolecular Sulfenamination of Olefins. *J. Am. Chem. Soc.* **2014**, *136* (25), 8915–8918.
- (12) Rajabi, J.; Lorion, M. M.; Ly, V. L.; Liron, F.; Oble, J.; Prestat, G.; Poli, G. Dormant versus Evolving Aminopalladated Intermediates: Toward a Unified Mechanistic Scenario in PdII-Catalyzed Aminations. *Chem. – Eur. J.* **2014**, *20* (6), 1539–1546.
- (13) Zens, A.; Seubert, P.; Kolb, B.; Wurster, M.; Holzwarth, M.; Mannchen, F.; Forschner, R.; Claasen, B.; Kunz, D.; Laschat, S. Synthesis of 1-Acyl-2-Vinylcyclopropanes: Utilizing Copper-Carbenoid versus Sulfur Ylide Methodology. *Synthesis* **2018**, *50* (12), 2367–2384.
- (14) Horner, J. H.; Musa, O. M.; Bouvier, A.; Newcomb, M. Absolute Kinetics of Amidyl Radical Reactions. *J. Am. Chem. Soc.* **1998**, *120* (31), 7738–7748.
- (15) Lorion, M. M.; Duarte, F. J. S.; Calhorda, M. J.; Oble, J.; Poli, G. Opening the Way to Catalytic Aminopalladation/Proxycyclic Dehydropalladation: Access to Methylidene  $\gamma$ -Lactams. *Org. Lett.* **2016**, *18* (5), 1020–1023.

- (16) Moriggi, J.-D.; Brown, L. J.; Castro, J. L.; Brown, R. C. D. Ring-Closing Metathesis: Development of a Cyclisation–Cleavage Strategy for the Solid-Phase Synthesis of Cyclic Sulfonamides. *Org. Biomol. Chem.* **2004**, 2 (6), 835–844.
- (17) Hamada, S.; Yano, K.; Kobayashi, Y.; Kawabata, T.; Furuta, T. Oxidation of Cyclic Benzylic Ethers by an Electronically Tuned Nitroxyl Radical. *Tetrahedron Lett.* **2021**, 83, 153404.
- (18) Harald Günther. *NMR Spectroscopy: Basic Principles, Concepts and Applications in Chemistry, 3rd Edition*; John Wiley & Sohns, **2013**.
- (19) Huggins, M. T.; Kesharwani, T.; Buttrick, J.; Nicholson, C. Variable Temperature NMR Experiment Studying Restricted Bond Rotation. *J. Chem. Educ.* **2020**, 97 (5), 1425–1429..
- (20) Lide, D., CRC handbook of chemistry and physics. *CRC press*: **2004**; Vol. 85.

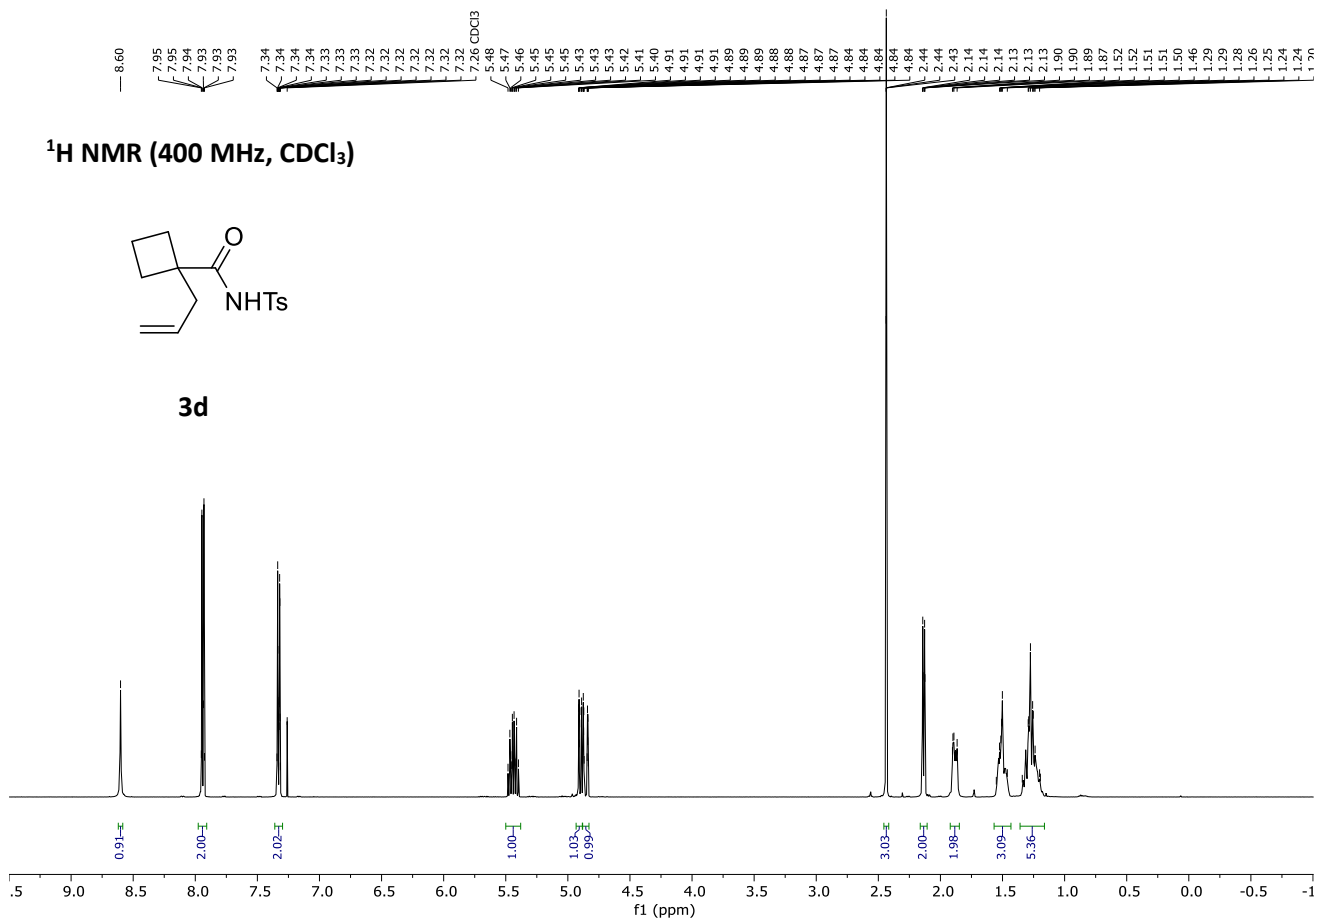

i

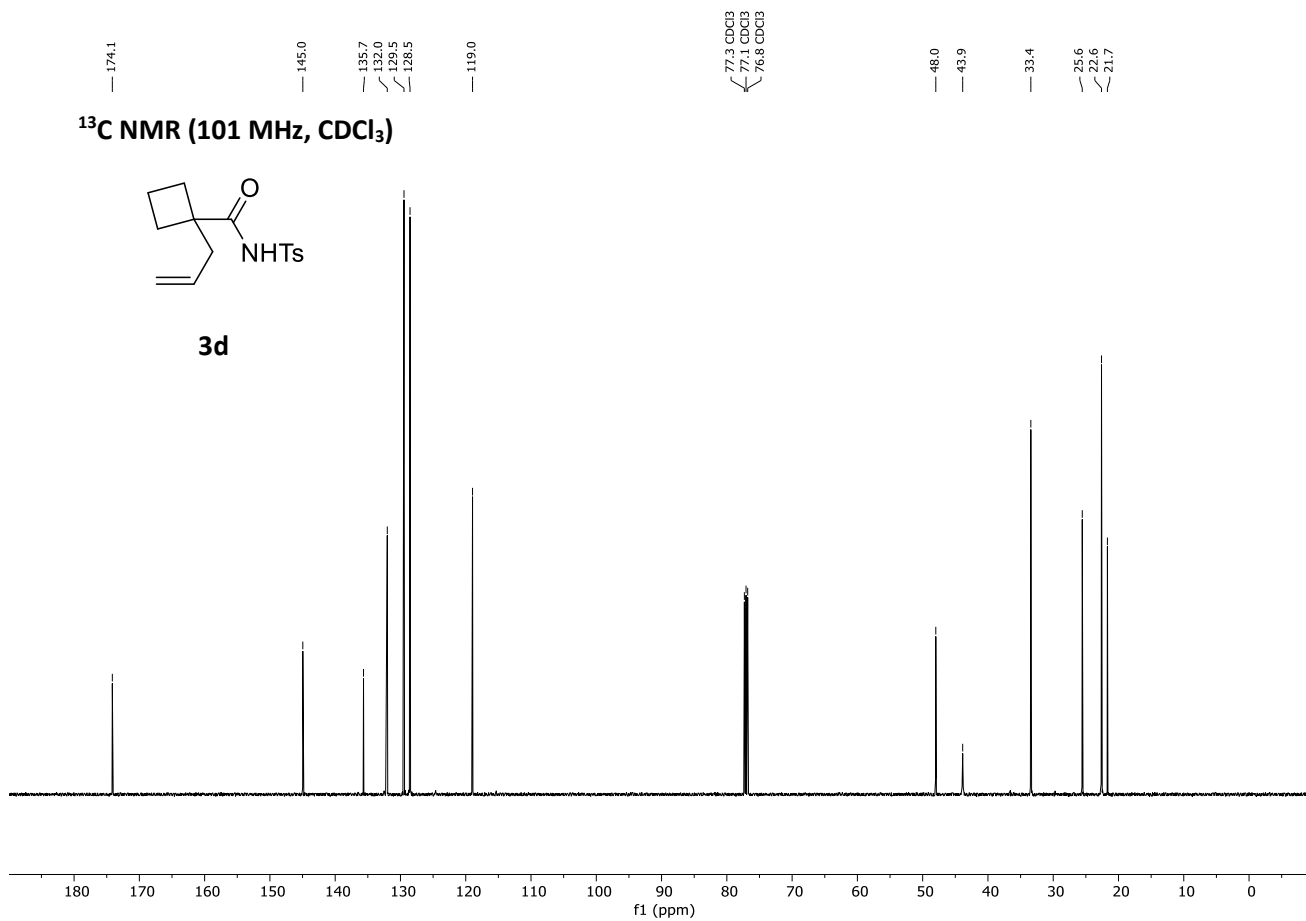

**<sup>1</sup>H NMR (400 MHz, CDCl<sub>3</sub>)**

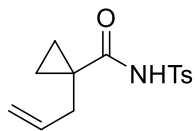

**3e**

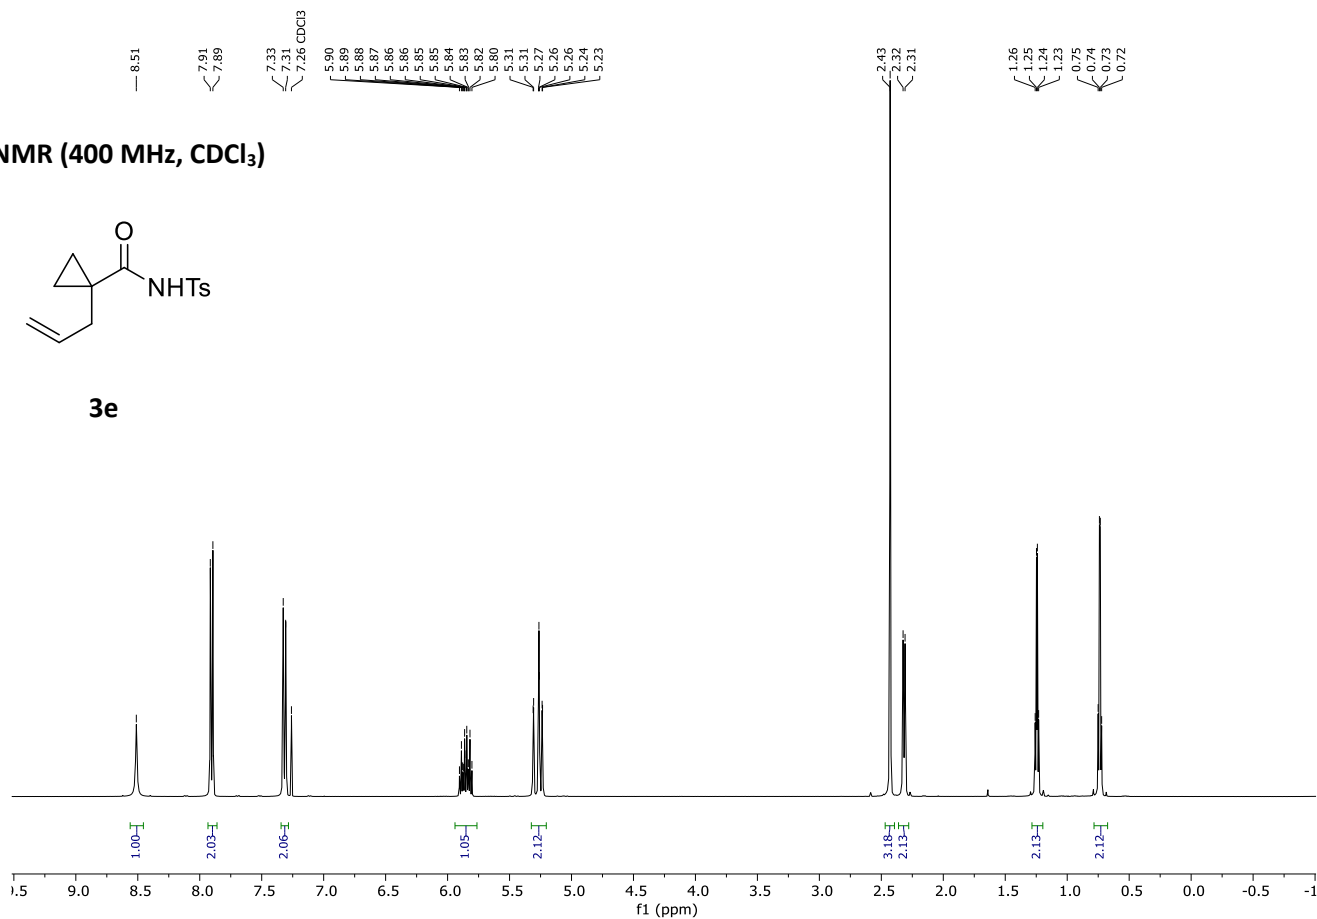

**<sup>13</sup>C NMR (101 MHz, CDCl<sub>3</sub>)**

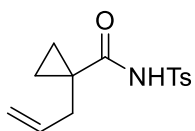

**3e**

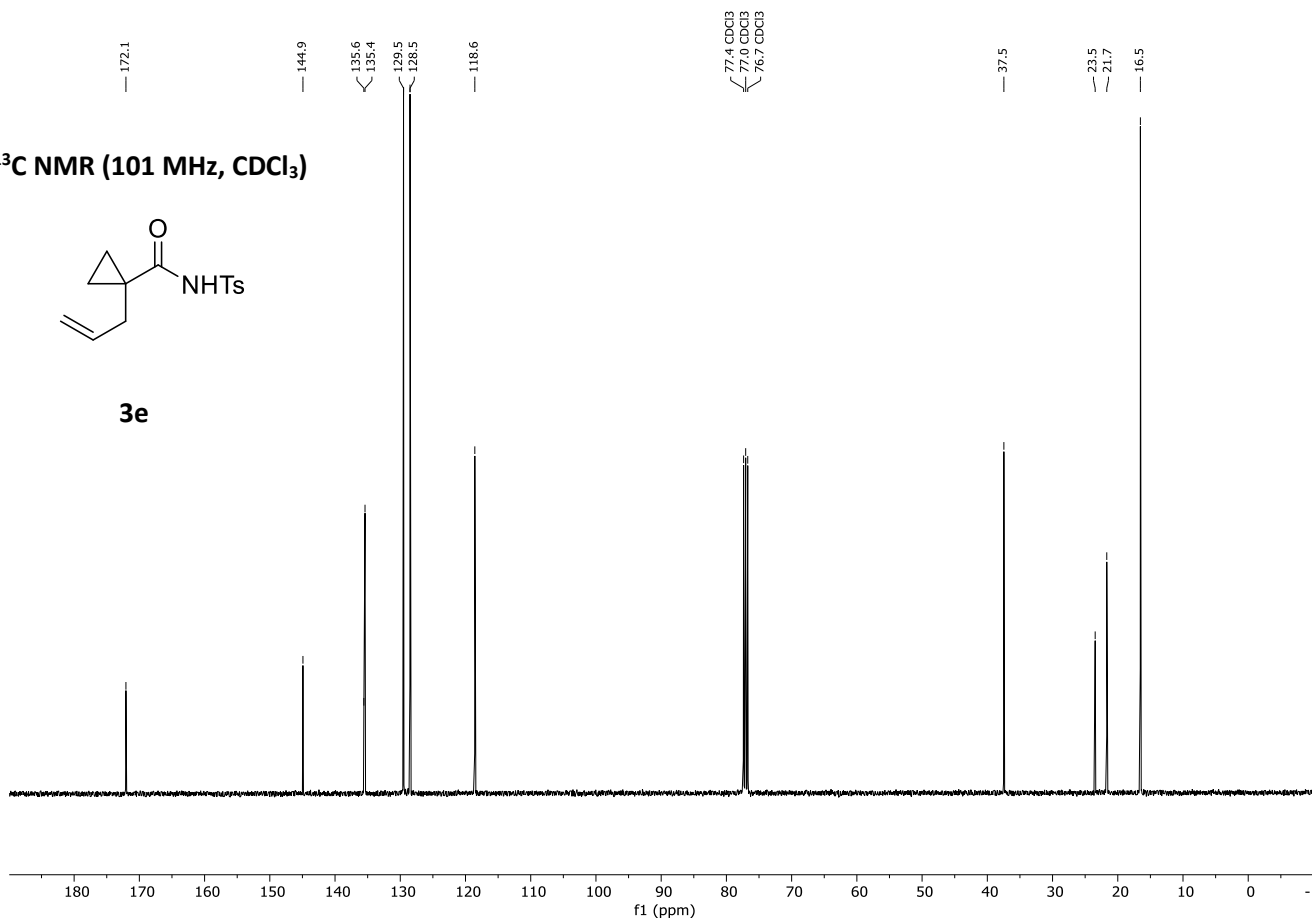

<sup>1</sup>H NMR (400 MHz, CDCl<sub>3</sub>)

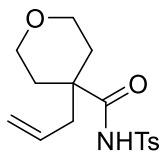

3h

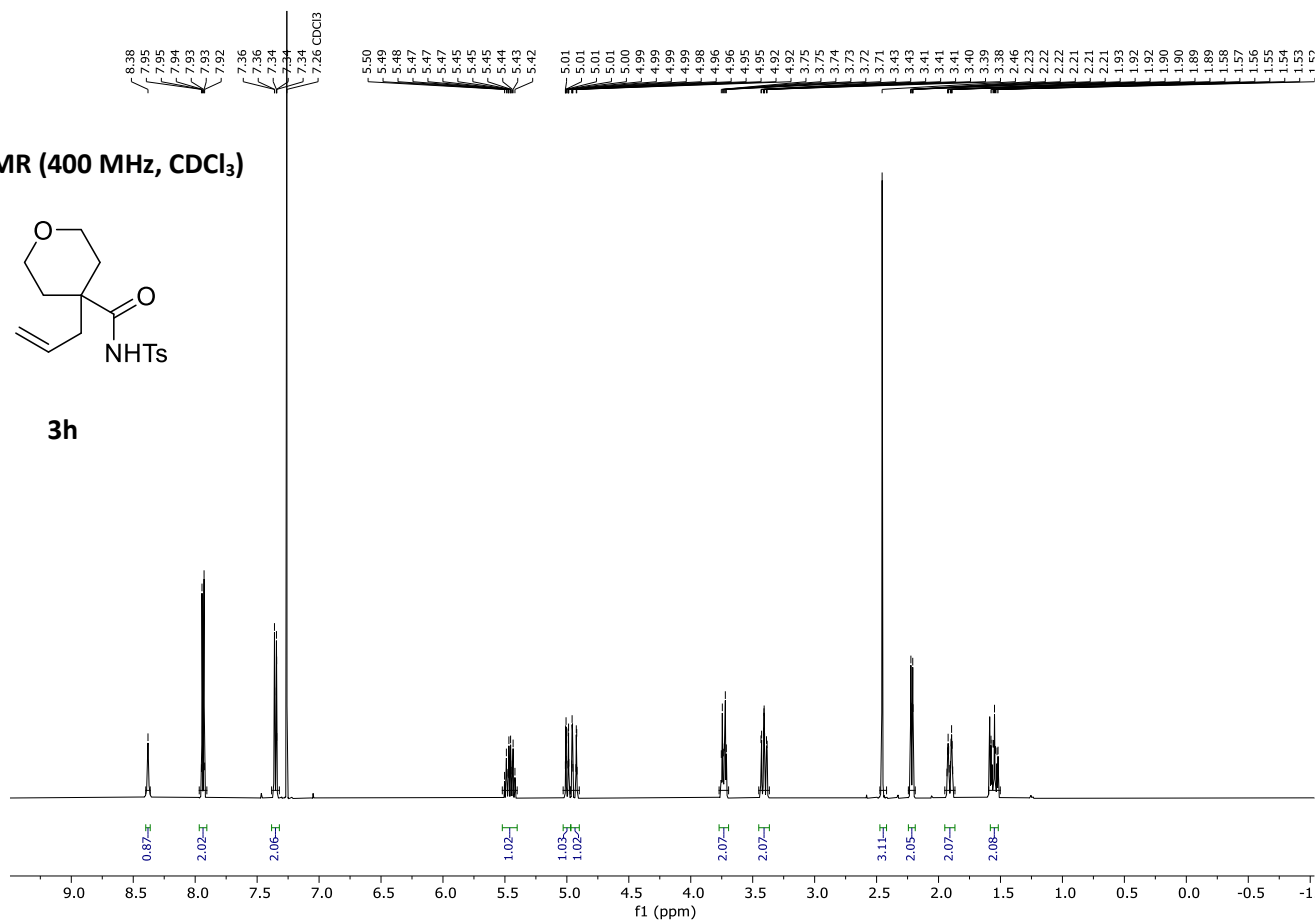

<sup>13</sup>C NMR (126 MHz, CDCl<sub>3</sub>)

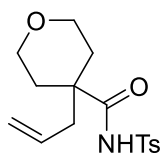

3h

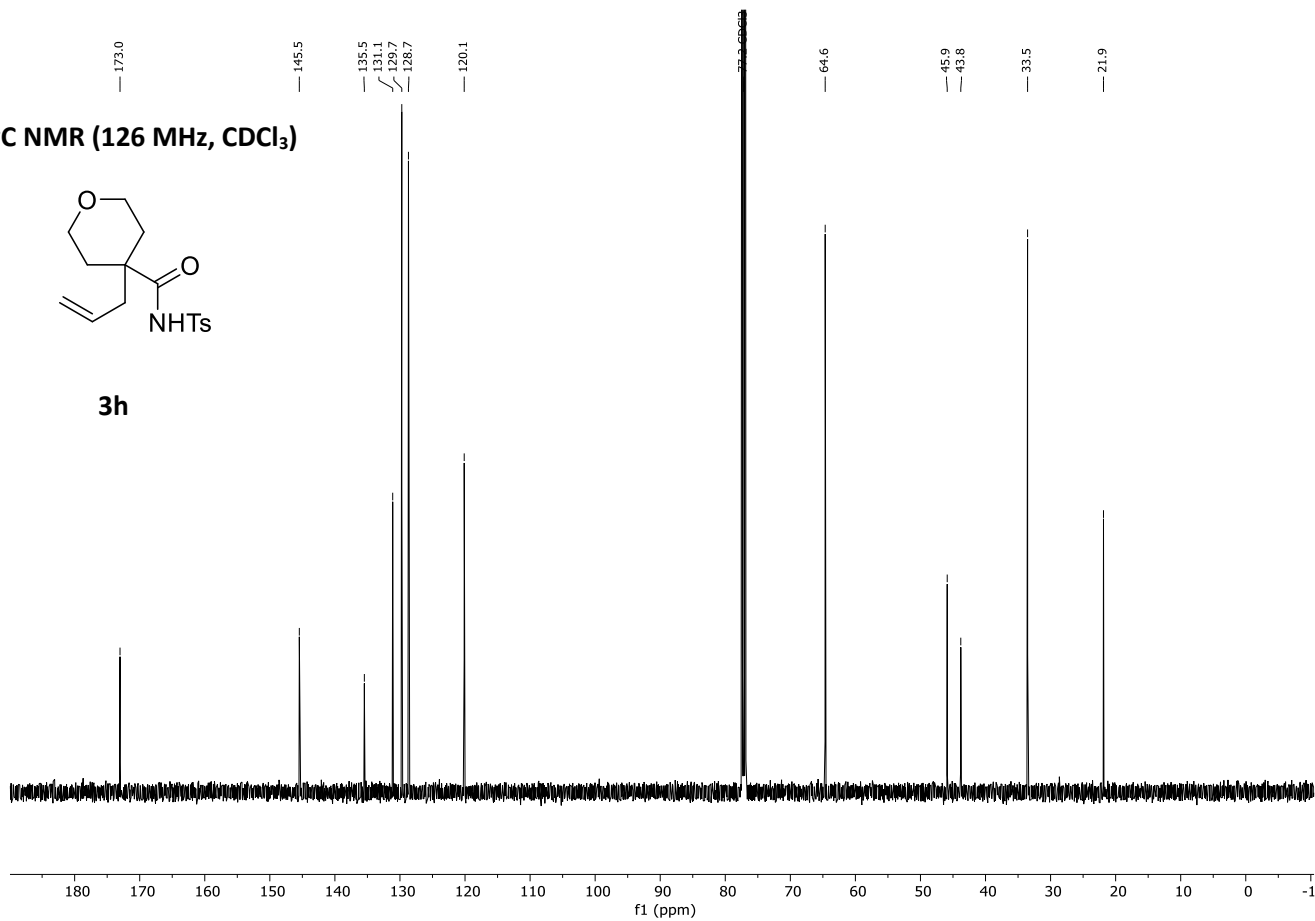



**<sup>1</sup>H NMR (500 MHz, CDCl<sub>3</sub>)**

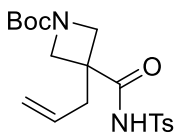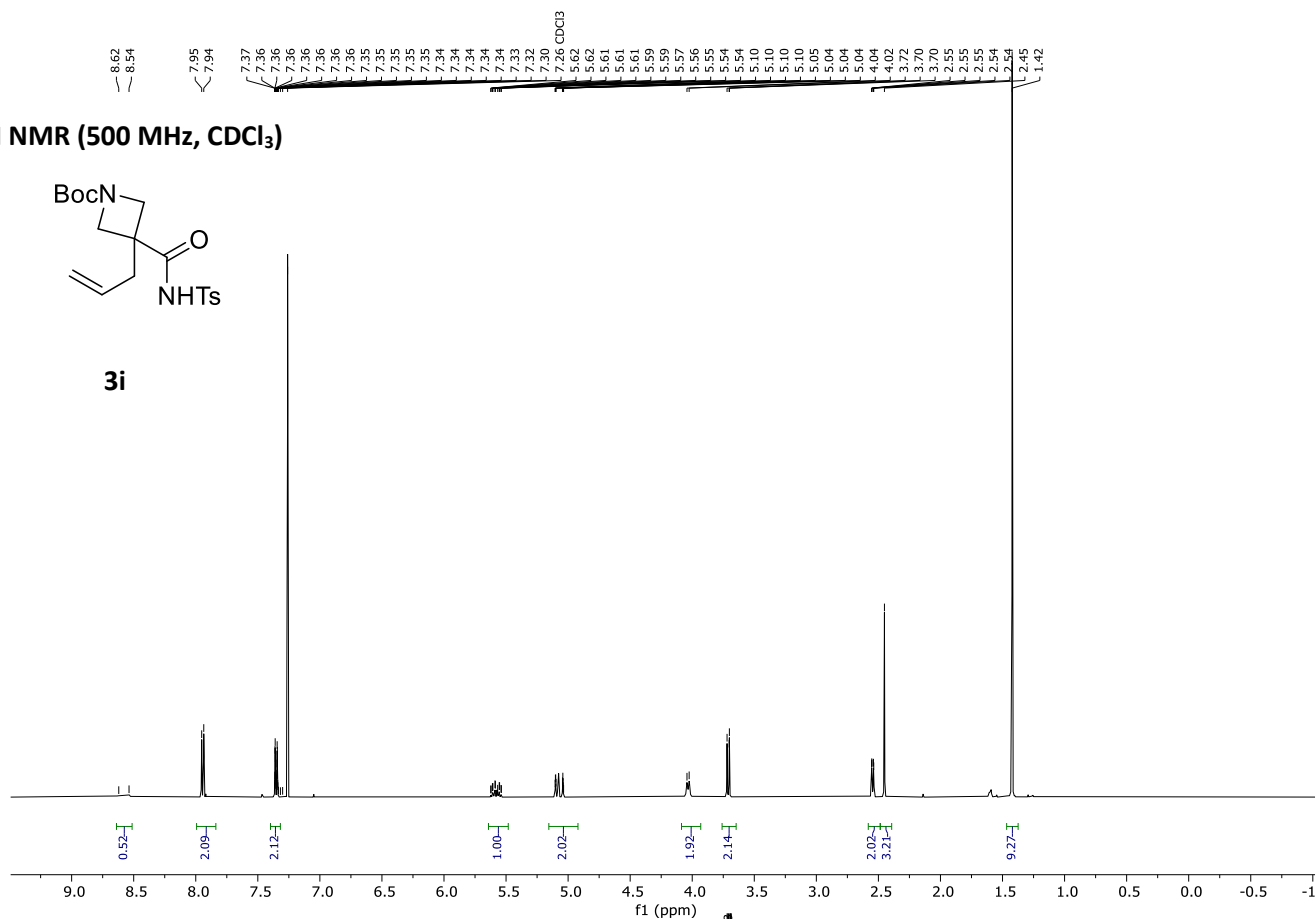

**<sup>13</sup>C NMR (126 MHz, CDCl<sub>3</sub>)**

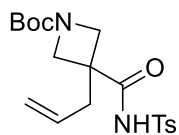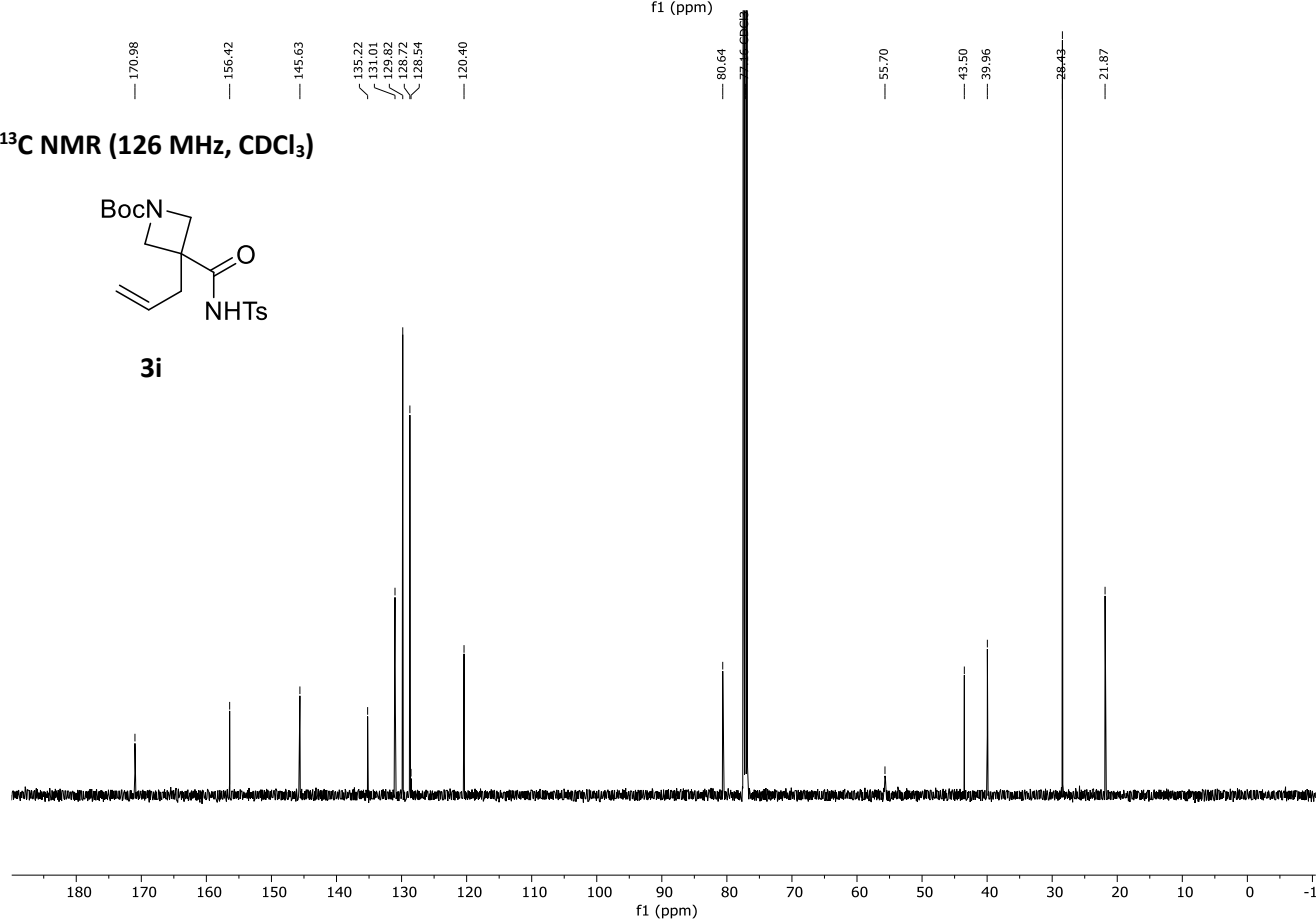

<sup>1</sup>H NMR (500 MHz, CDCl<sub>3</sub>)

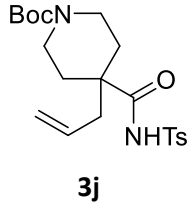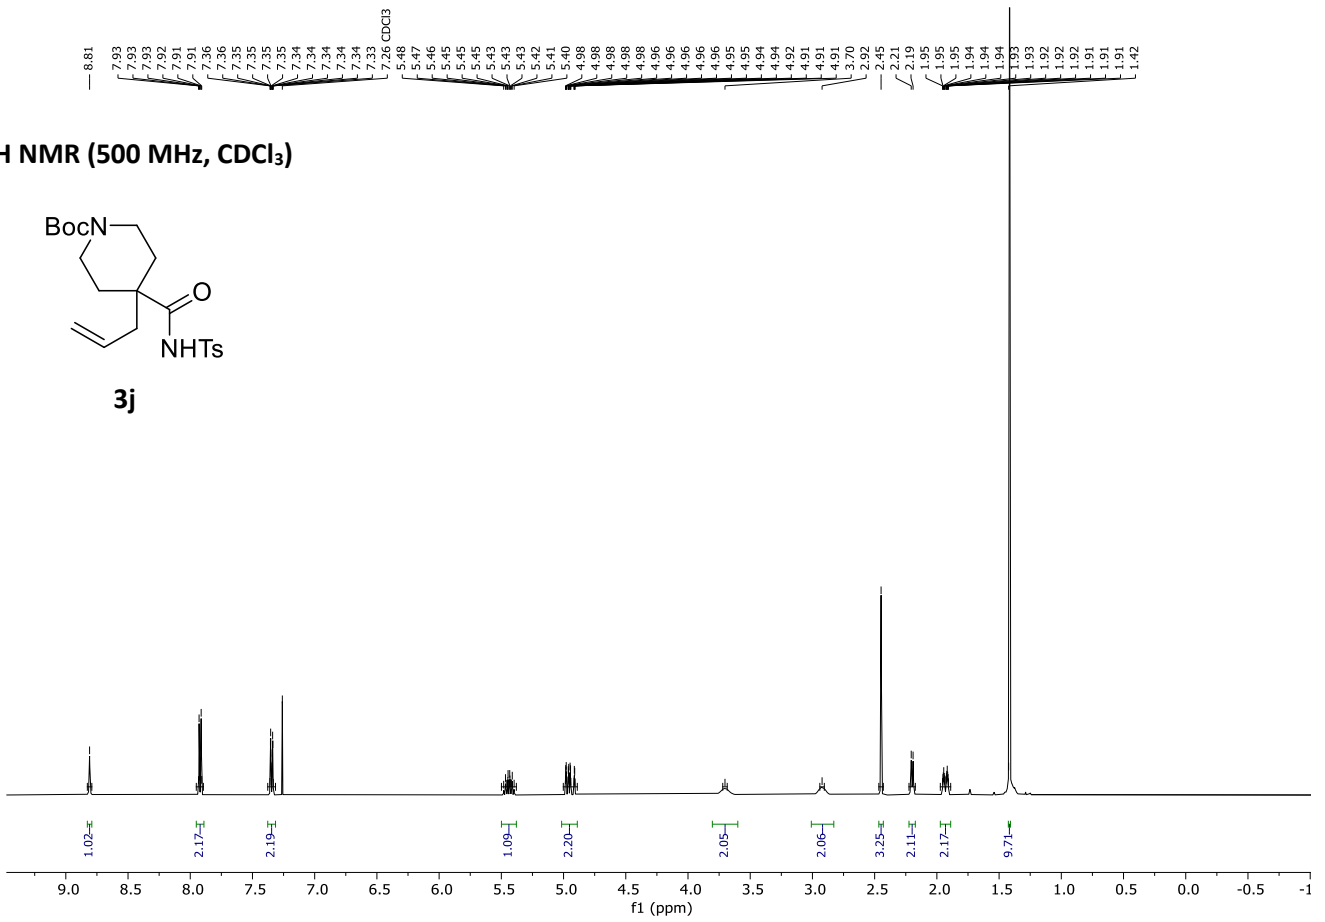

<sup>13</sup>C NMR (126 MHz, CDCl<sub>3</sub>)

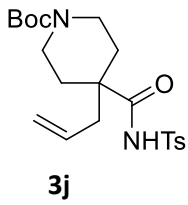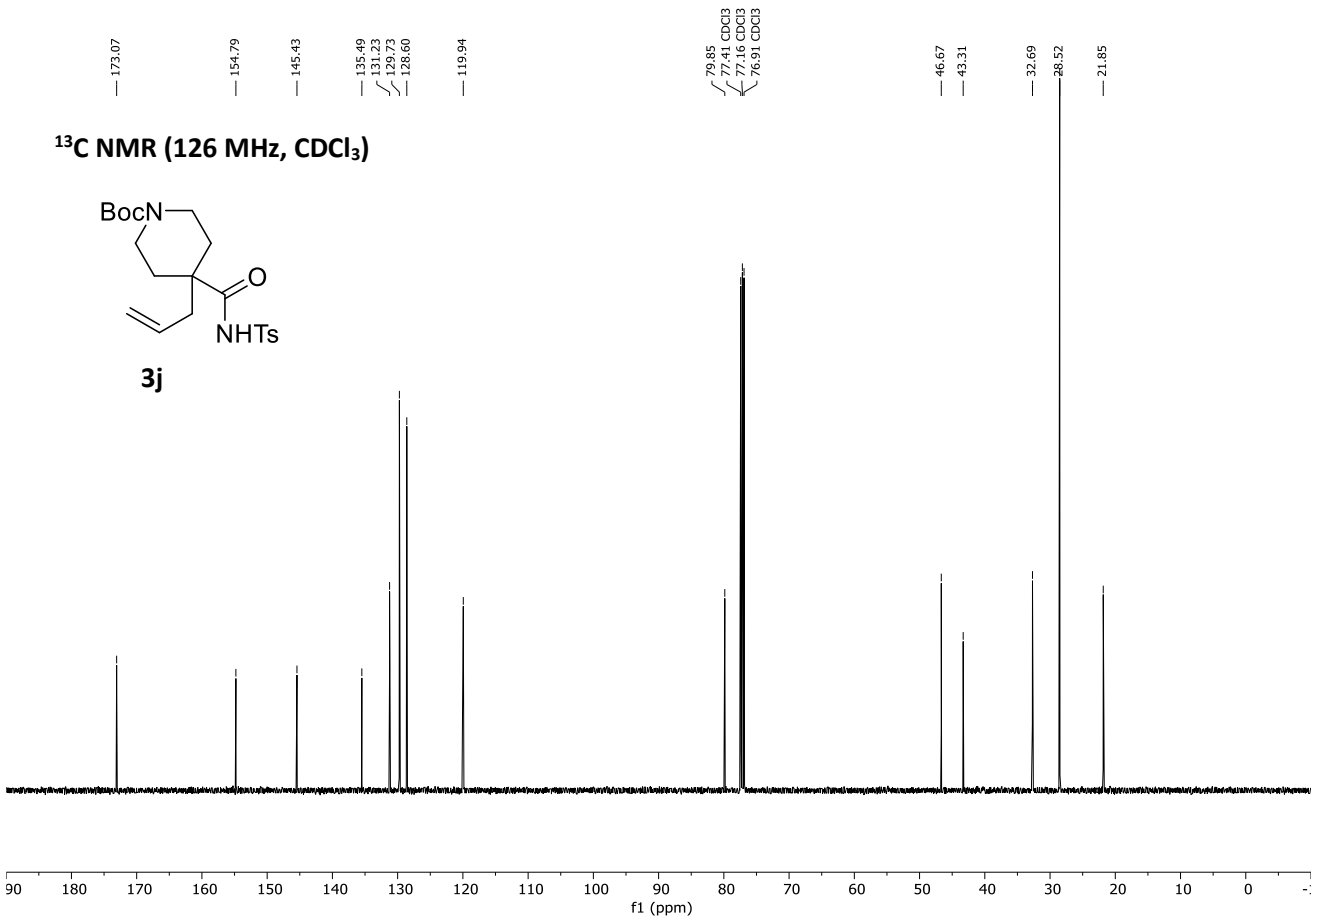

**<sup>1</sup>H NMR (400 MHz, CDCl<sub>3</sub>)**

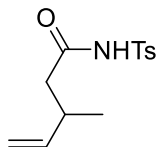

**3k**

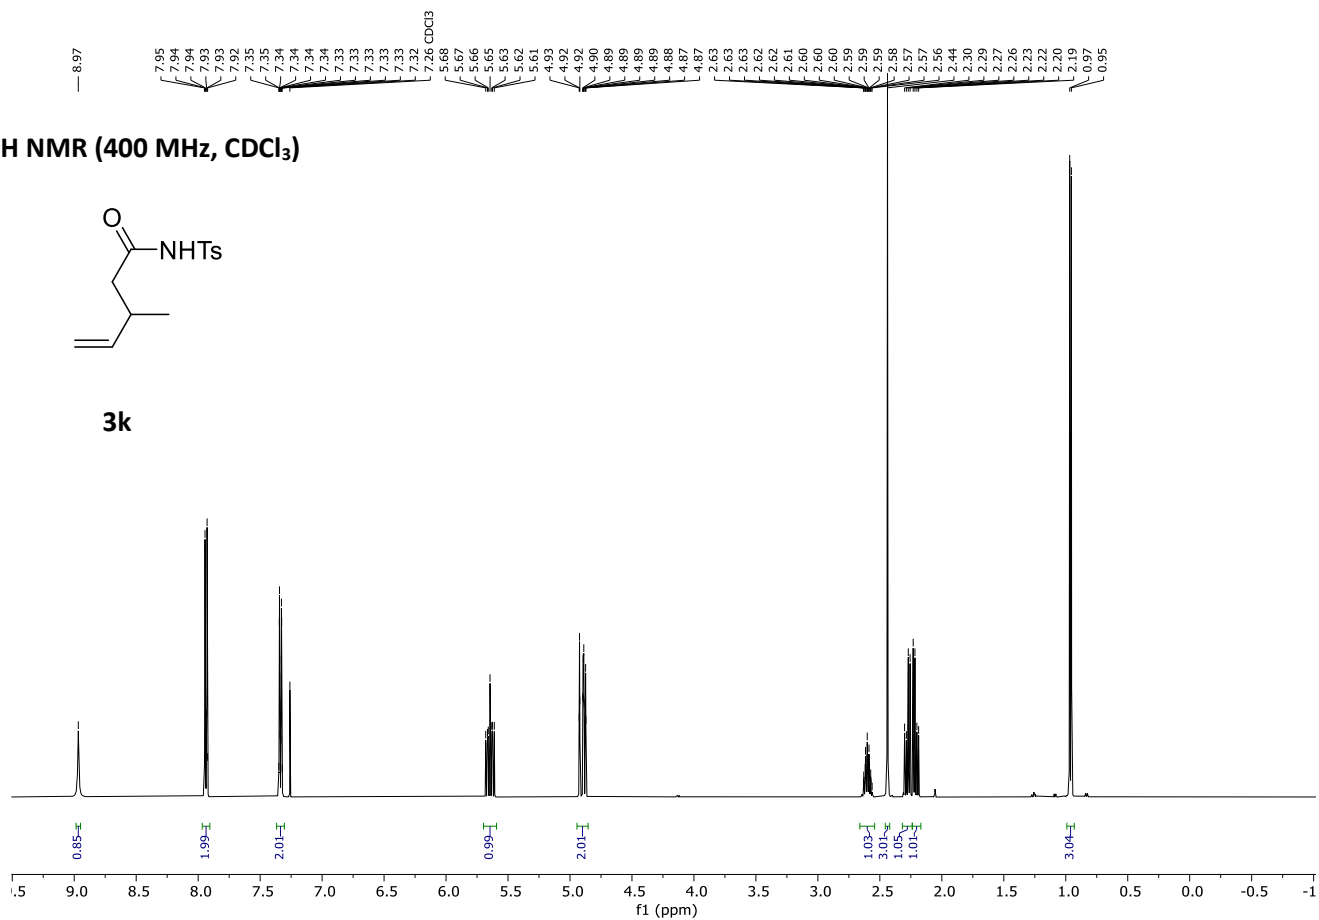

**<sup>13</sup>C NMR (101 MHz, CDCl<sub>3</sub>)**

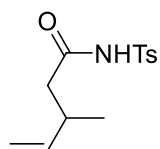

**3k**

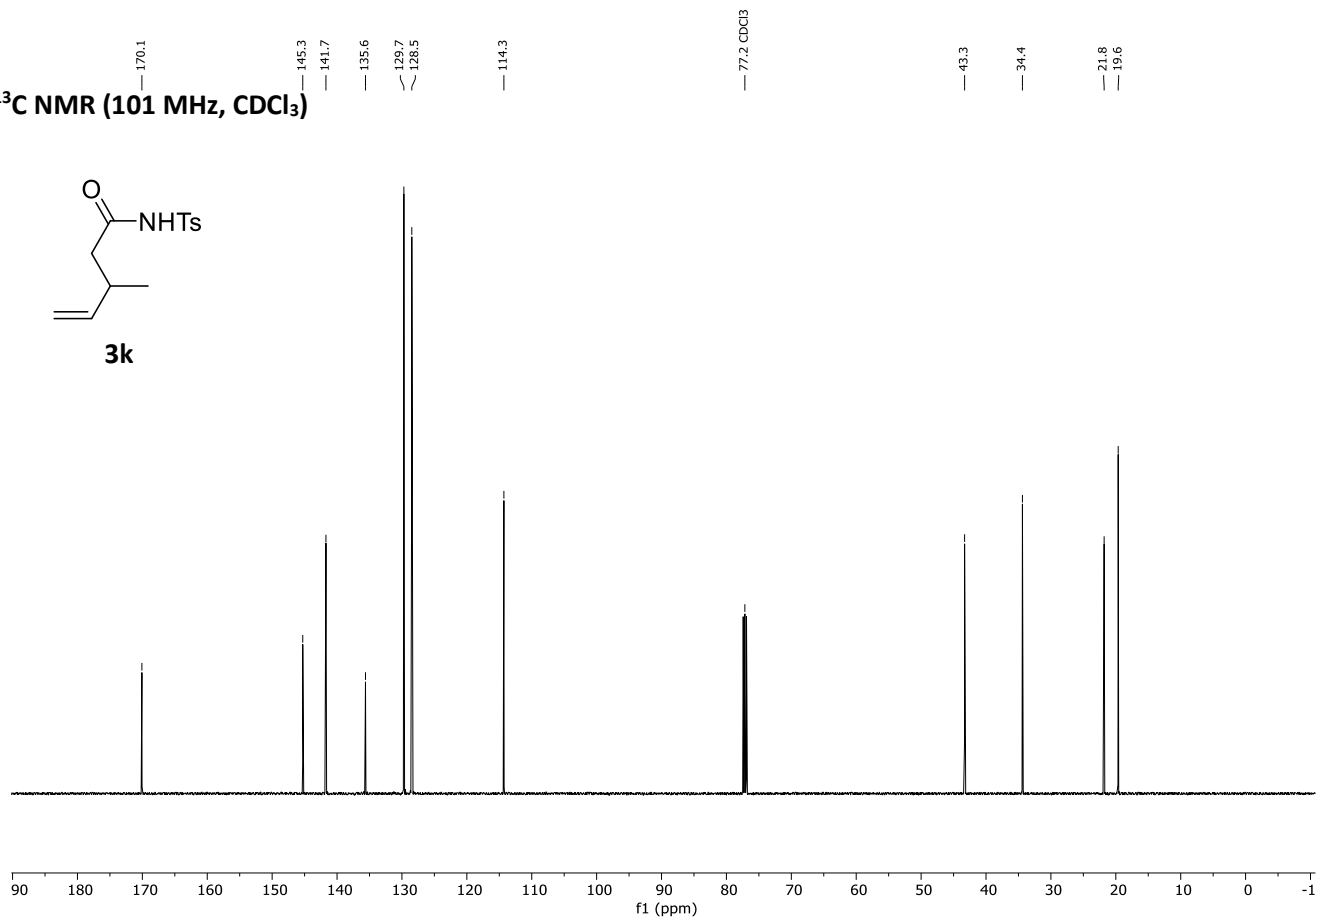

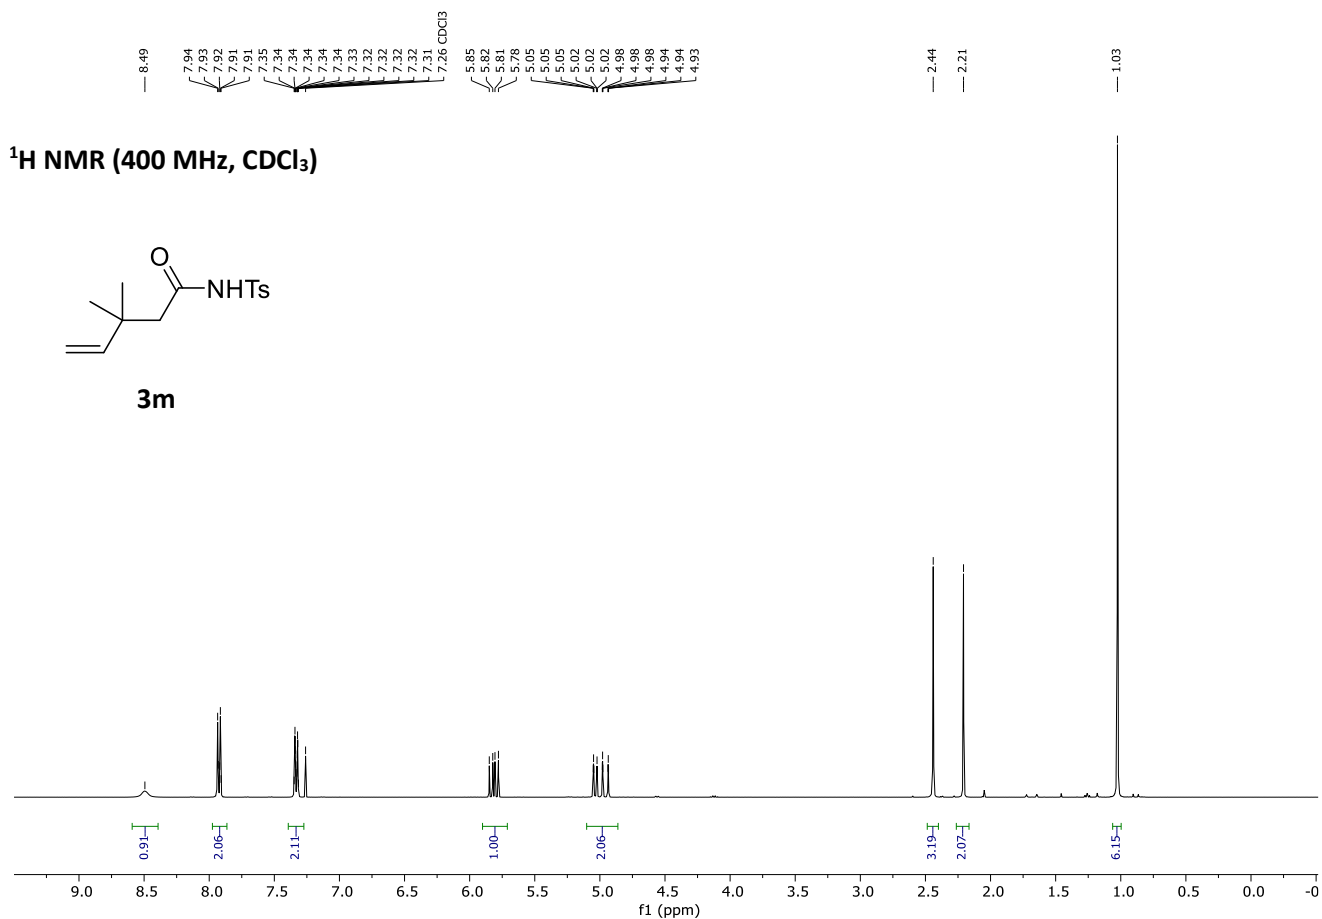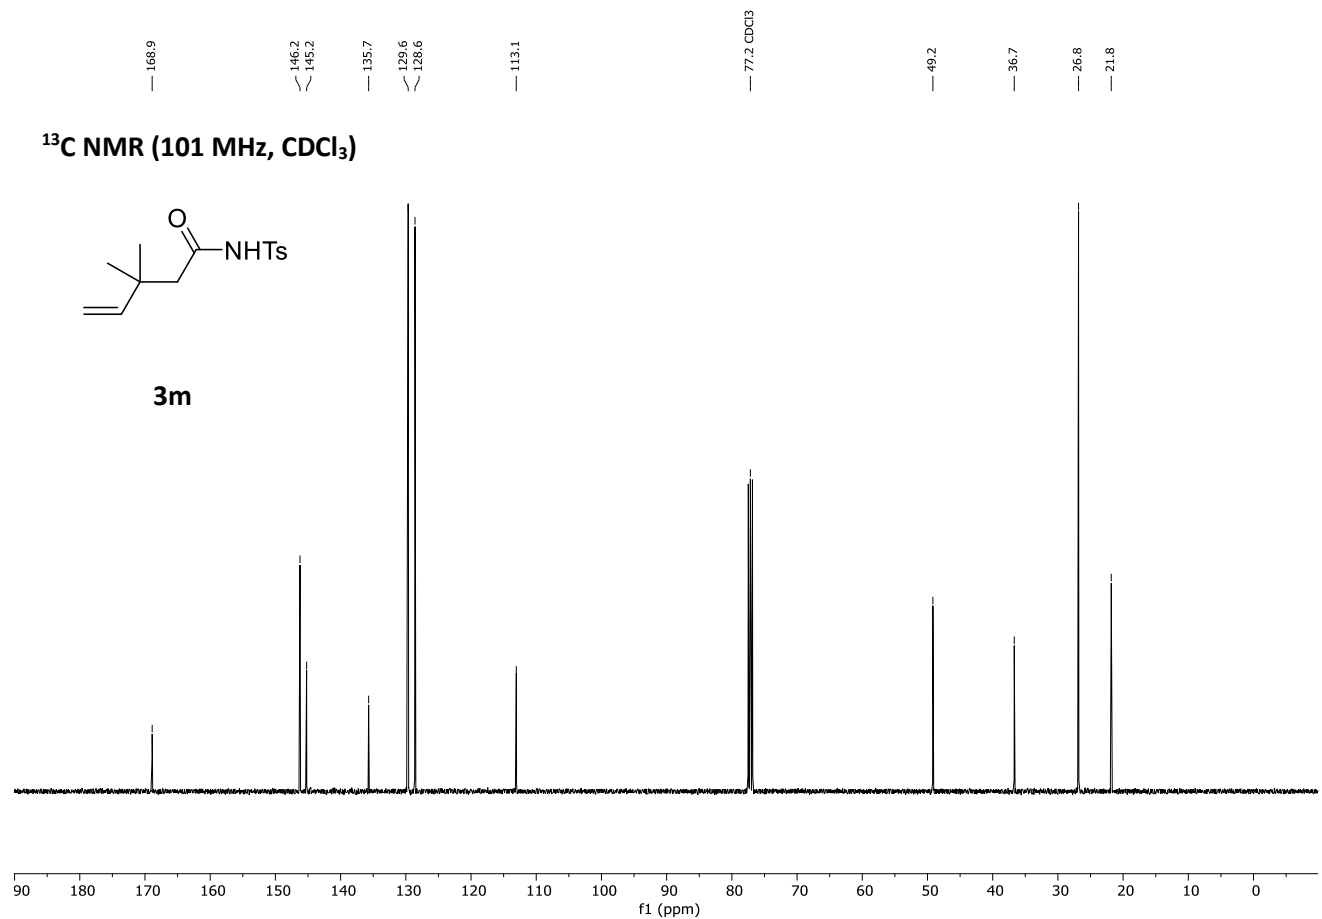

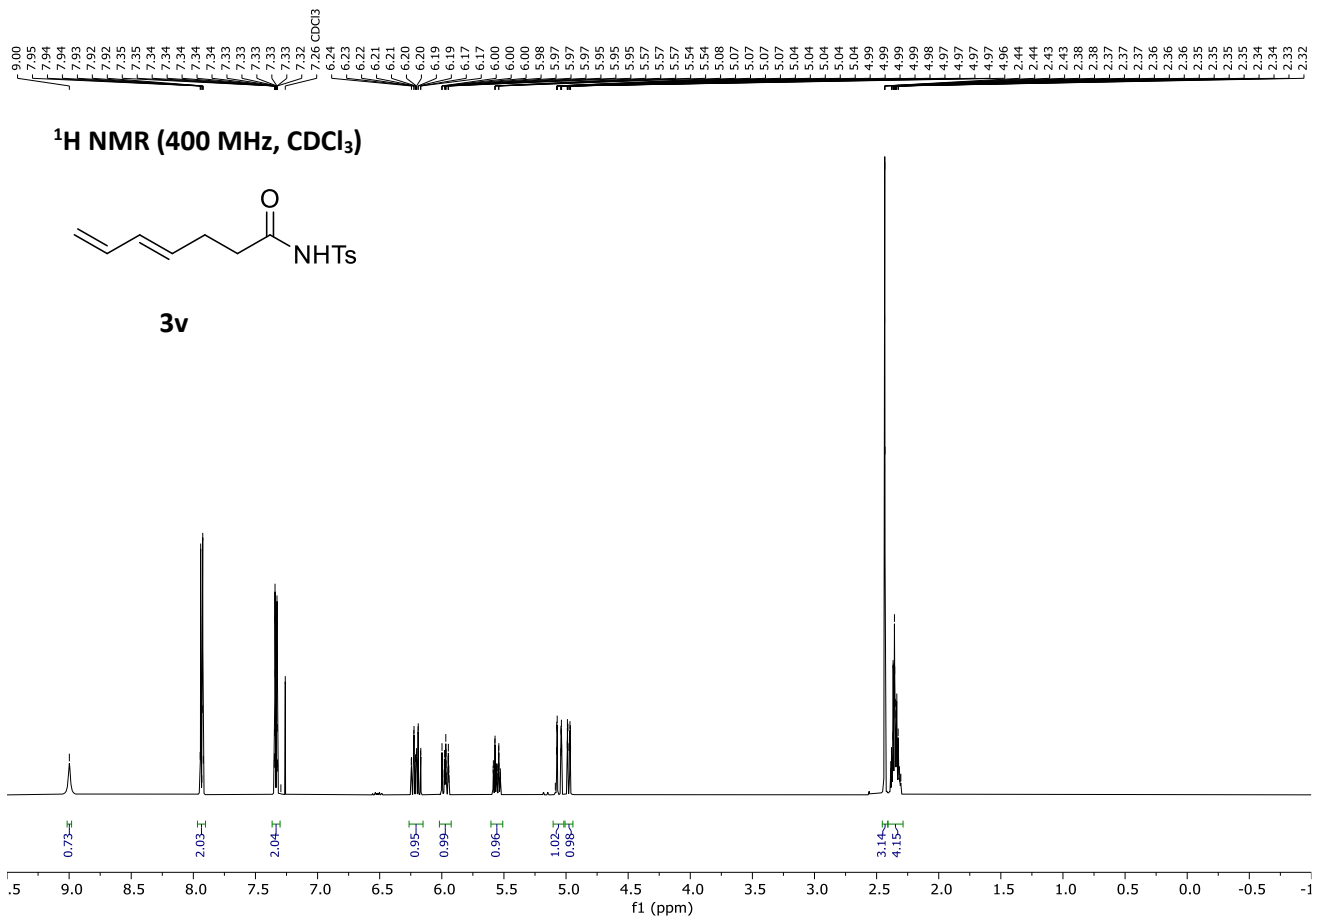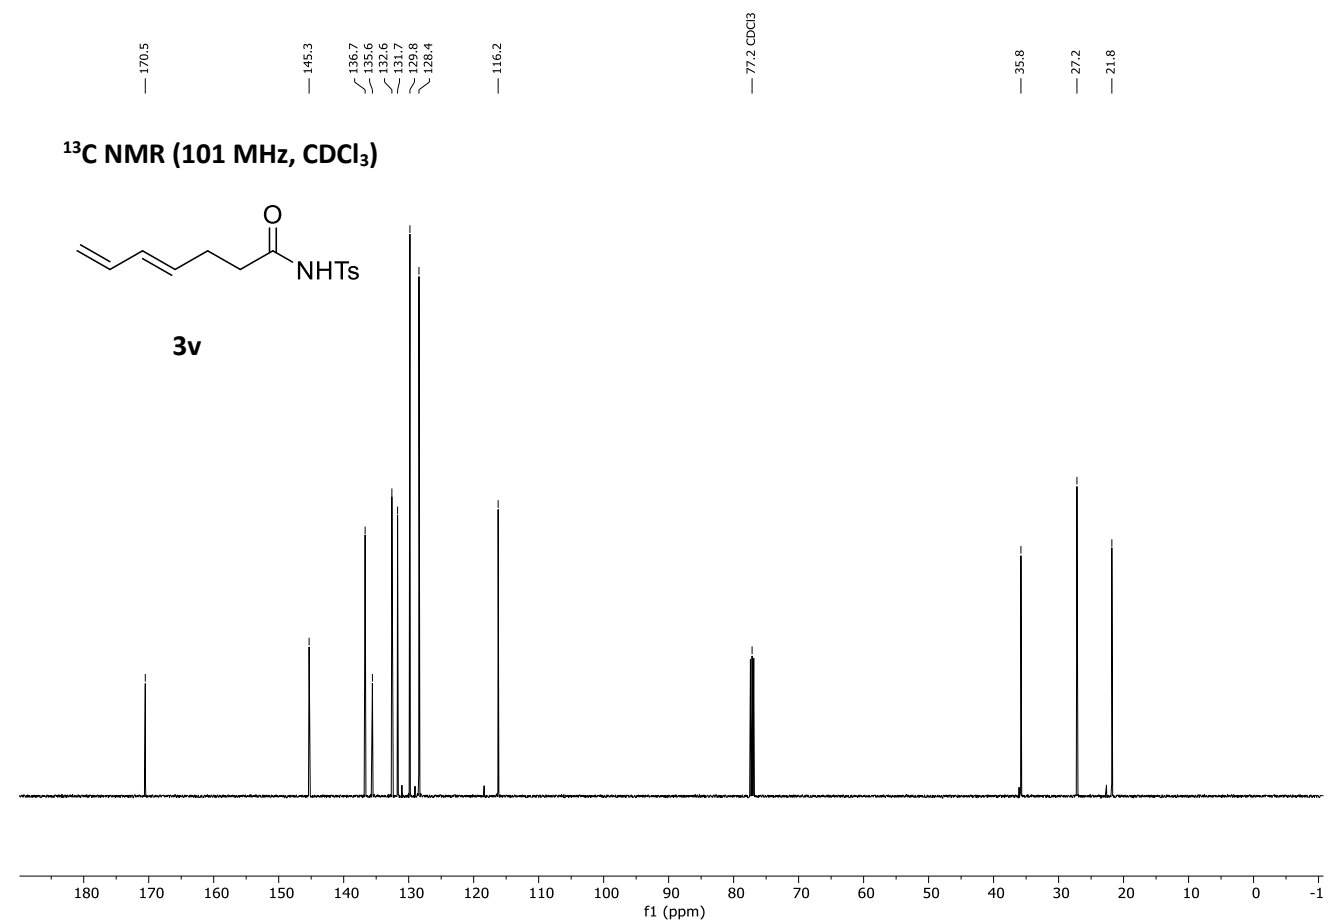



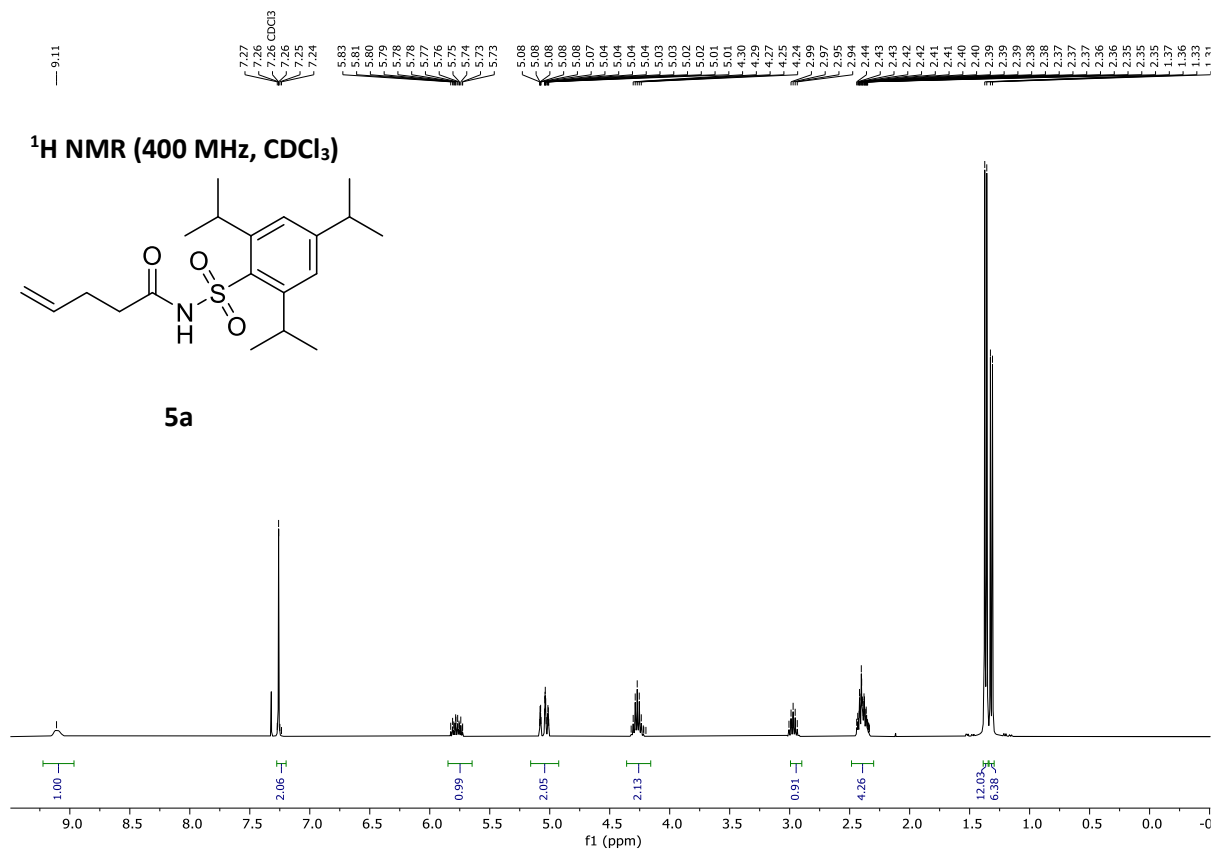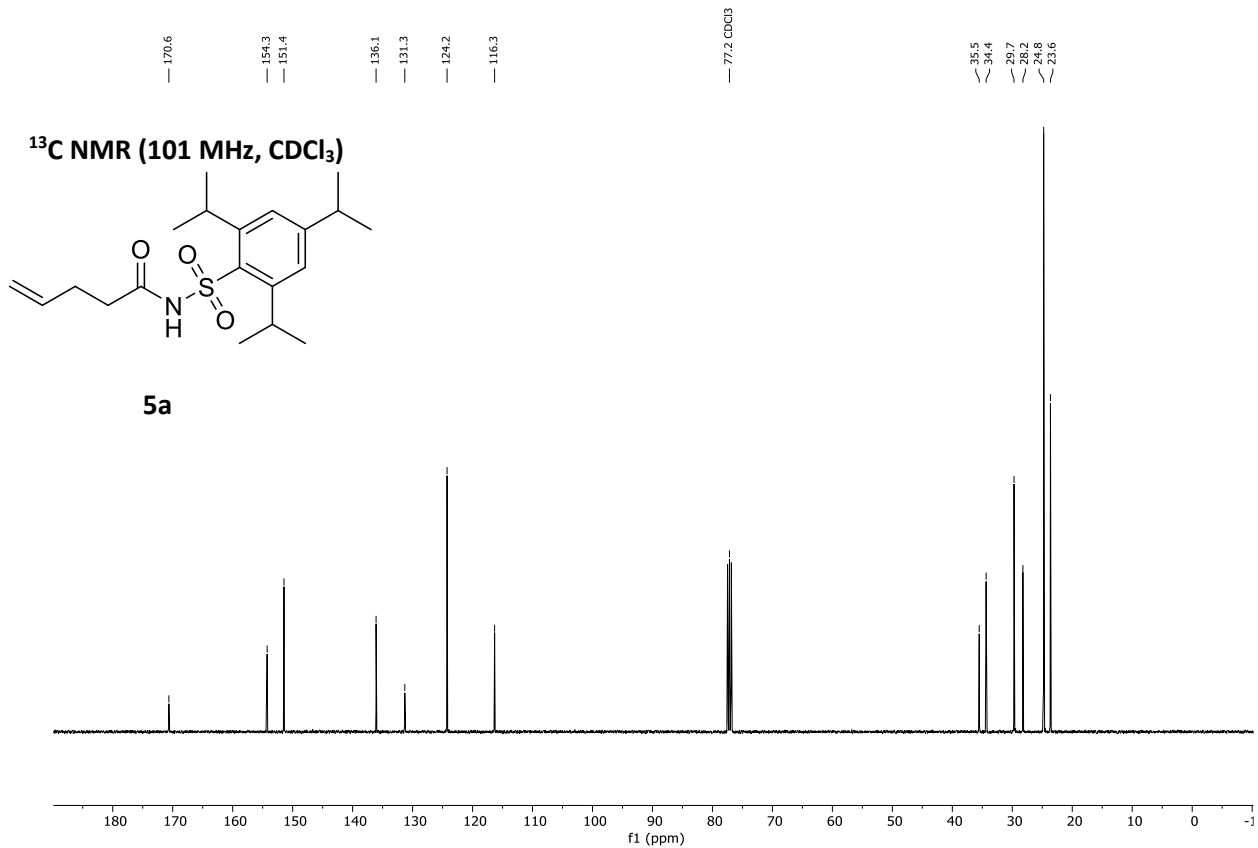

7.94  
7.93  
7.92  
7.92  
7.92  
7.33  
7.33  
7.32  
7.32  
7.31  
7.31  
7.31  
7.31  
7.30  
7.26 CDCl<sub>3</sub>

3.84  
3.84  
3.83  
3.82  
3.81  
3.81  
3.81  
3.80  
3.80  
3.79  
3.78

2.43  
2.42  
2.41  
2.41  
2.40  
2.40

1.81  
1.80  
1.80  
1.80  
1.79  
1.78  
1.77  
1.77  
1.77  
1.76  
1.75  
1.66  
1.65  
1.65  
1.64  
1.64  
1.62  
1.62  
1.61  
1.60  
1.18  
1.17

**<sup>1</sup>H NMR (400 MHz, CDCl<sub>3</sub>)**

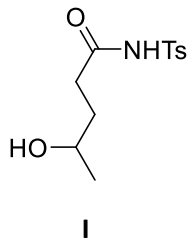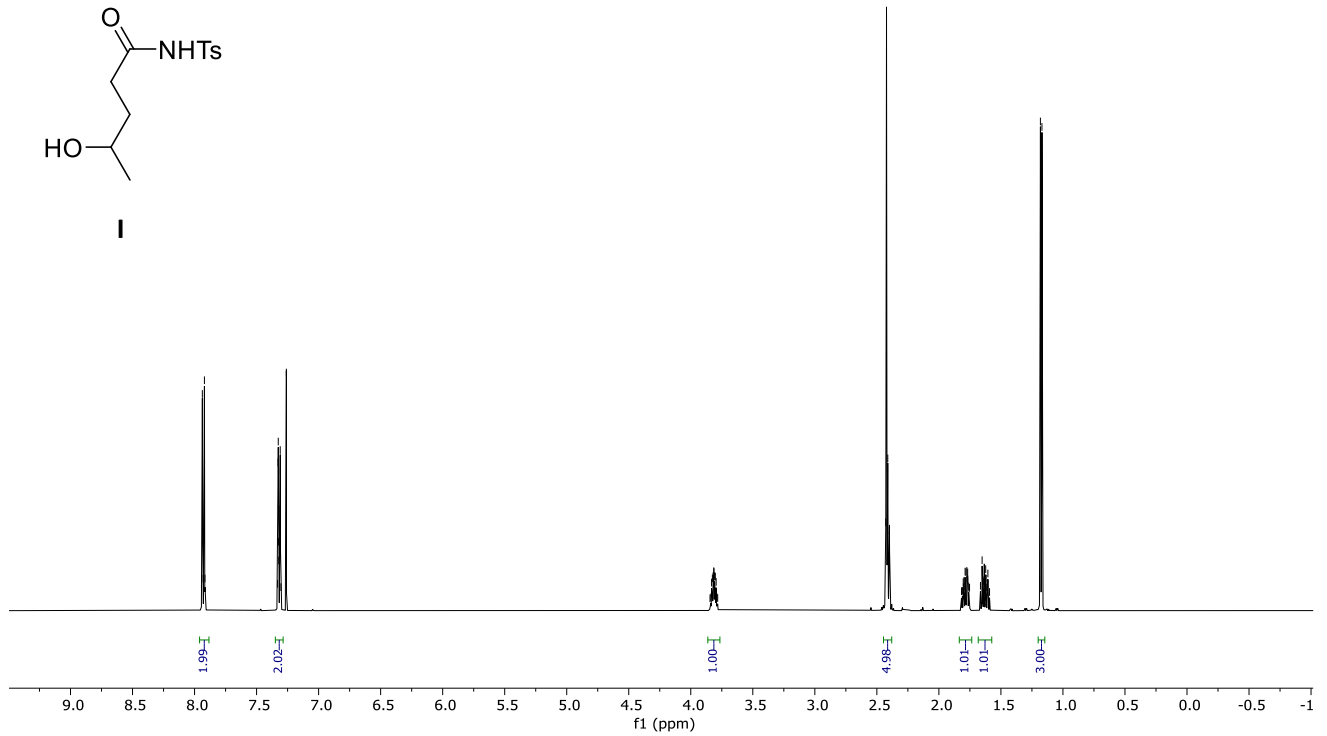

**<sup>13</sup>C NMR (101 MHz, CDCl<sub>3</sub>)**

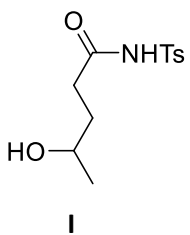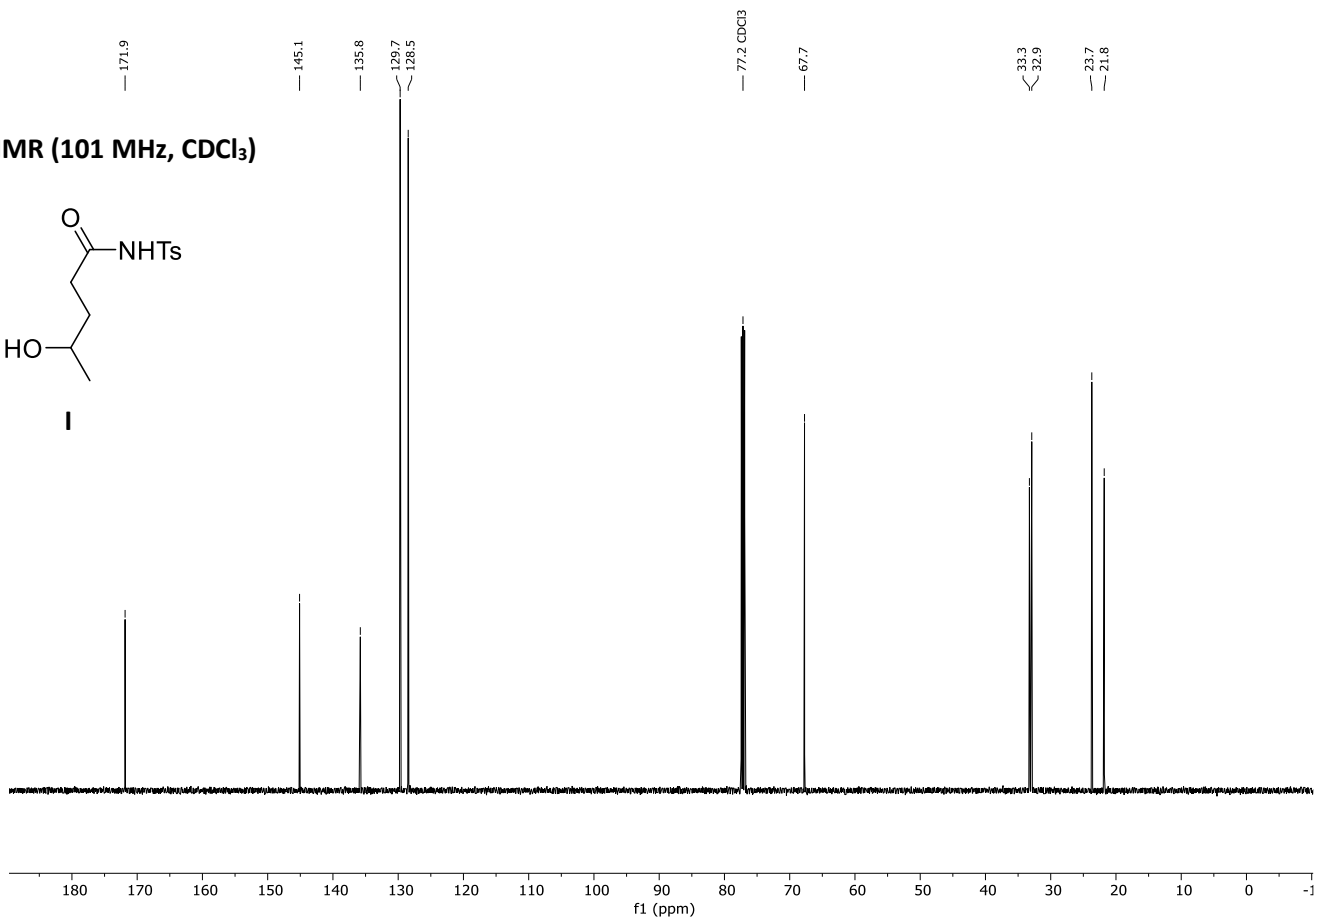



**<sup>1</sup>H NMR (500 MHz, CDCl<sub>3</sub>)**

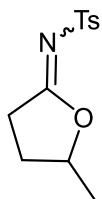

**4a**

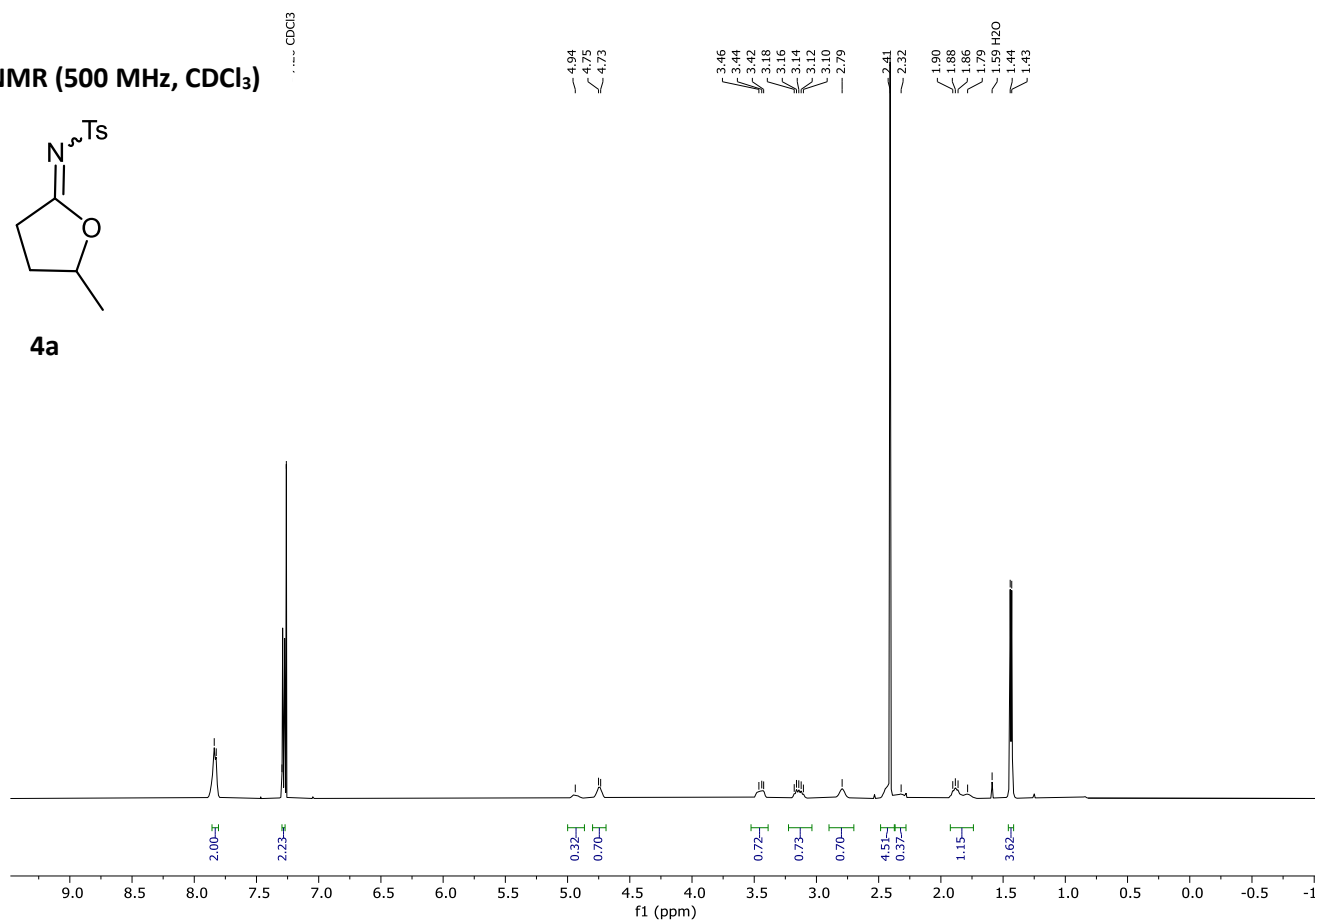

**<sup>13</sup>C NMR (126 MHz, CDCl<sub>3</sub>)**

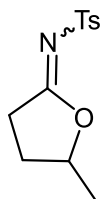

**4a**

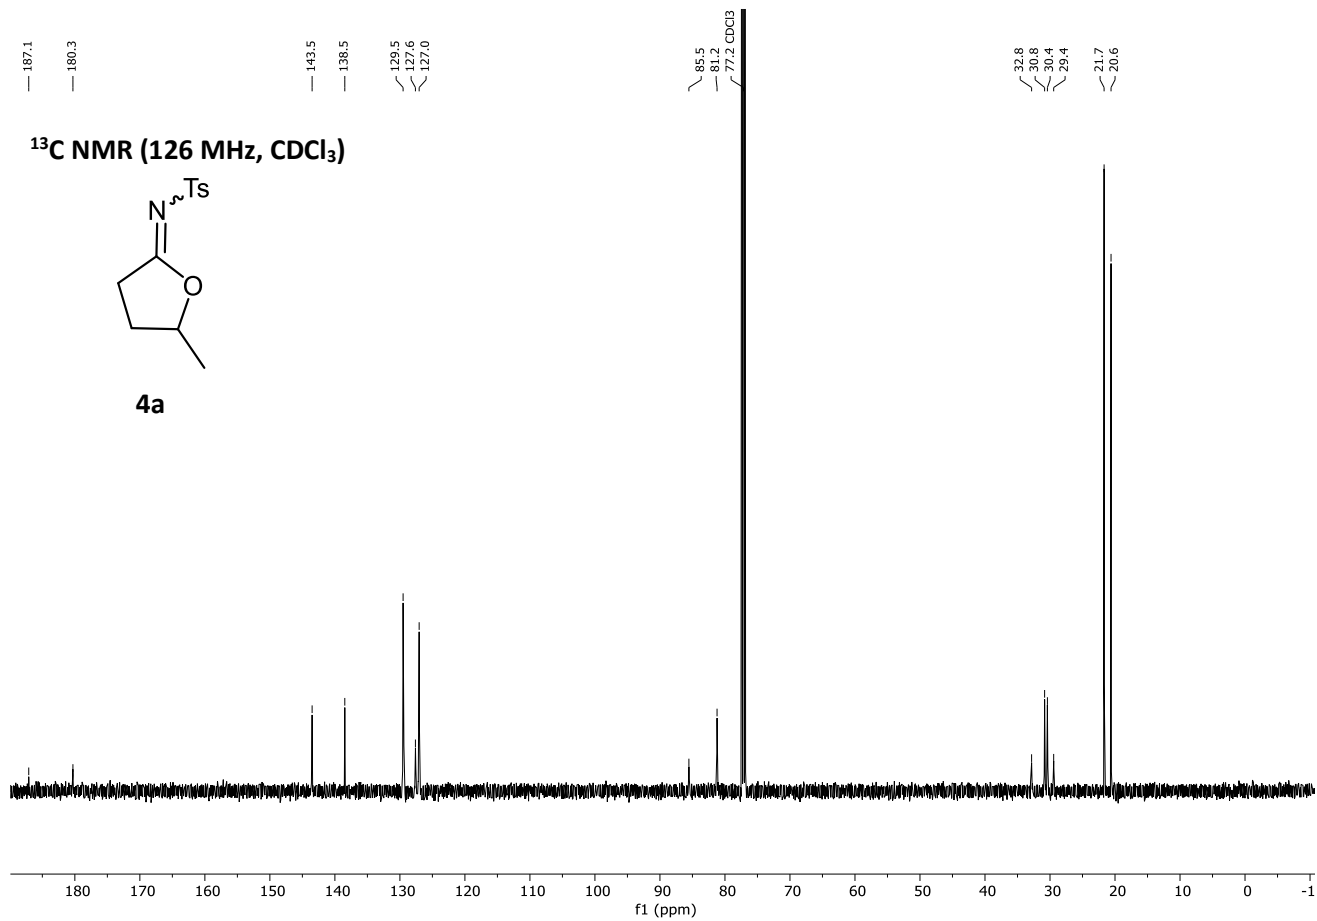

# $^1\text{H}$ - $^{13}\text{C}$ HSQC

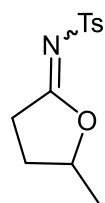

4a

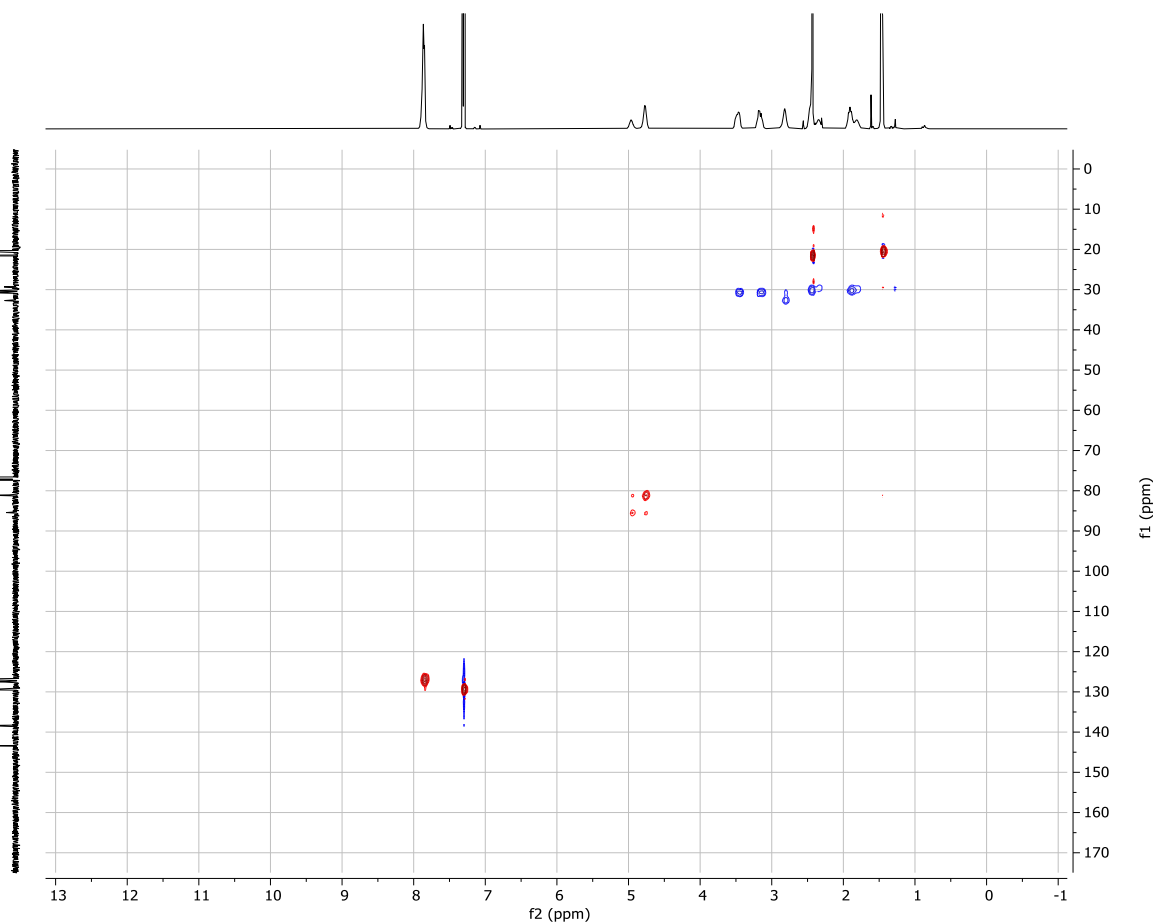

# $^1\text{H}$ - $^1\text{H}$ COSY

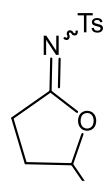

4a

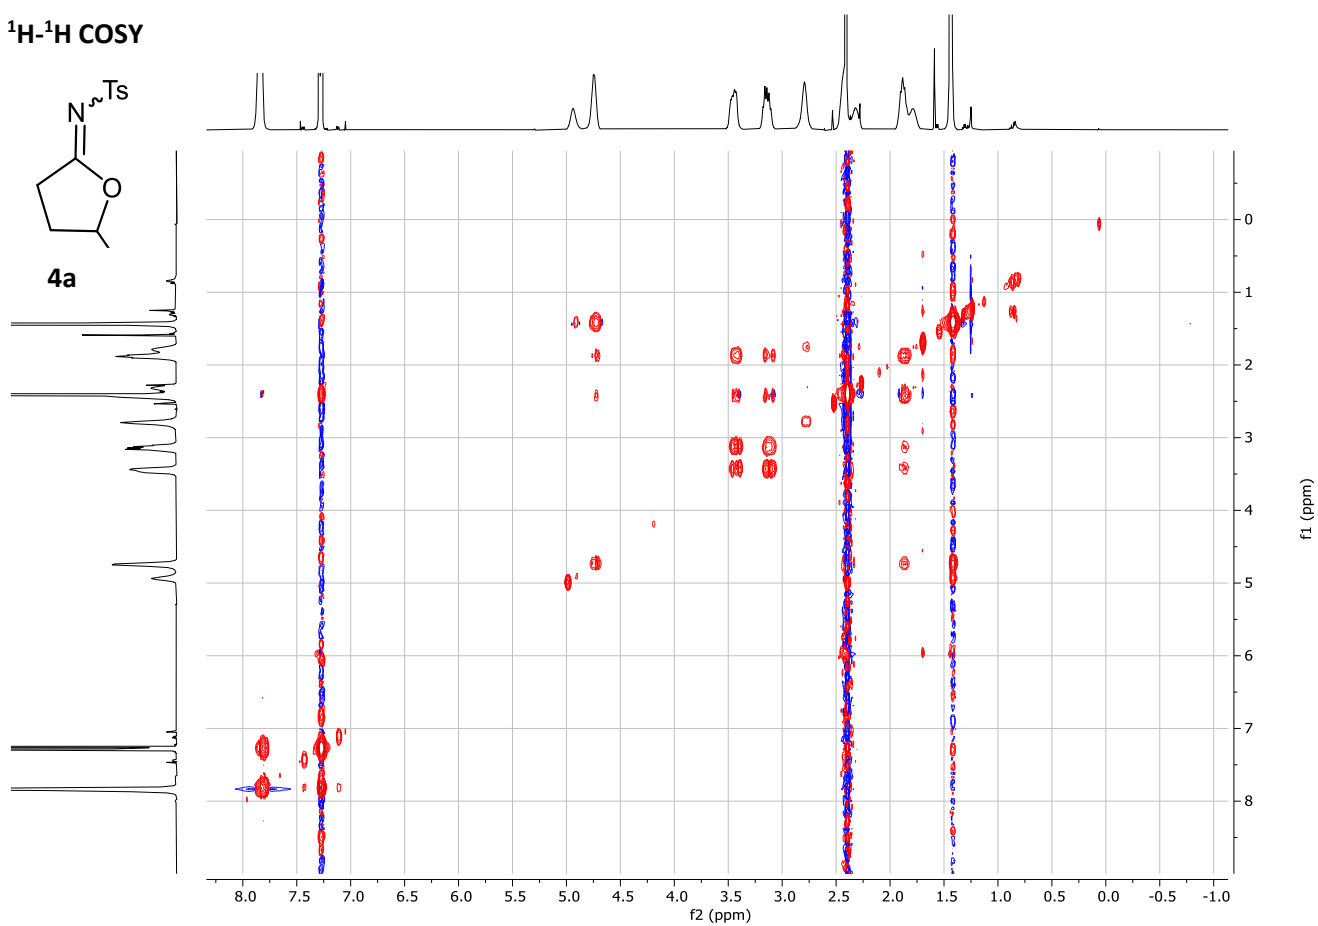

<sup>1</sup>H NMR (400 MHz, CDCl<sub>3</sub>)

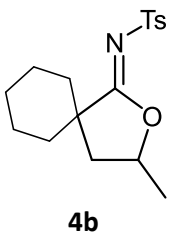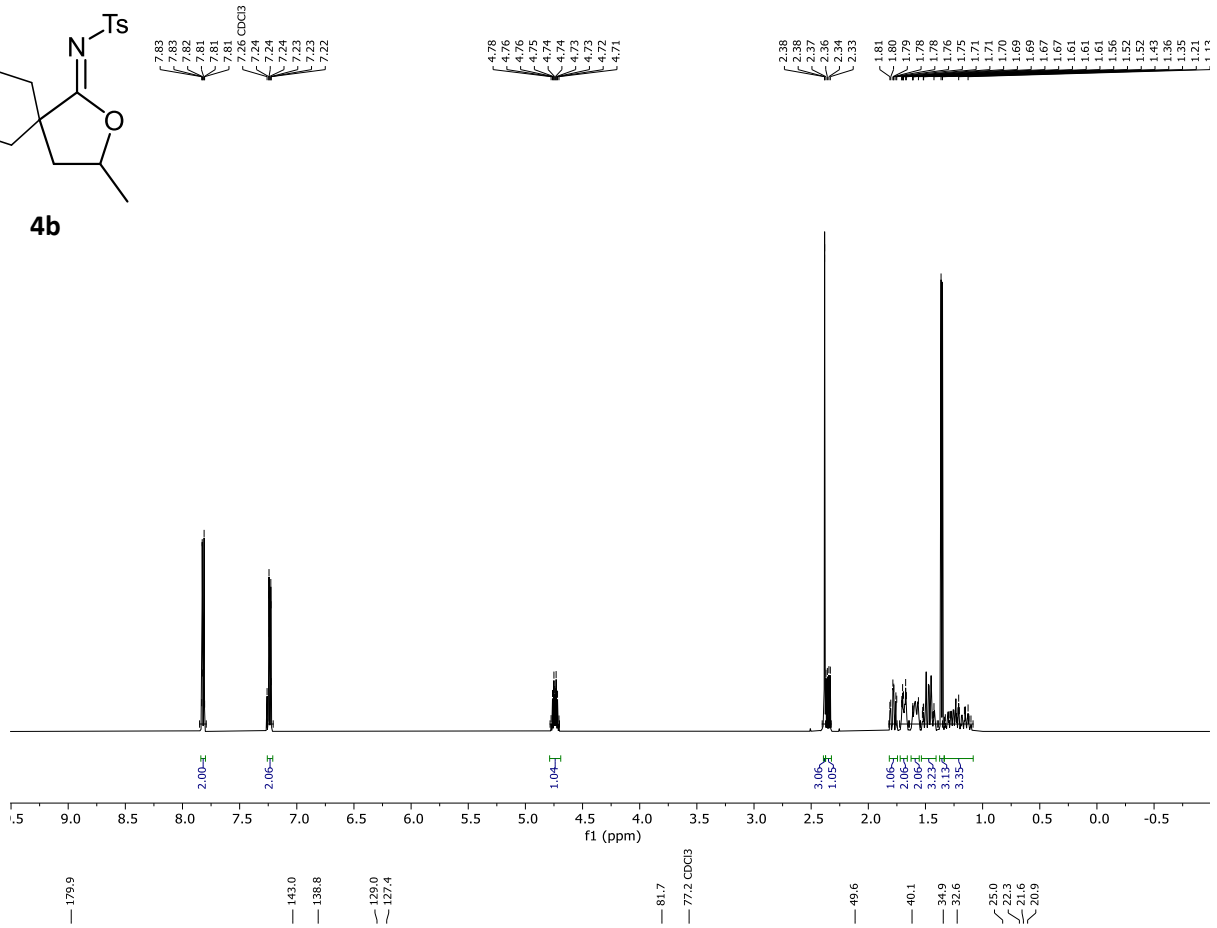

<sup>13</sup>C NMR (126 MHz, CDCl<sub>3</sub>)

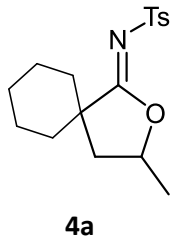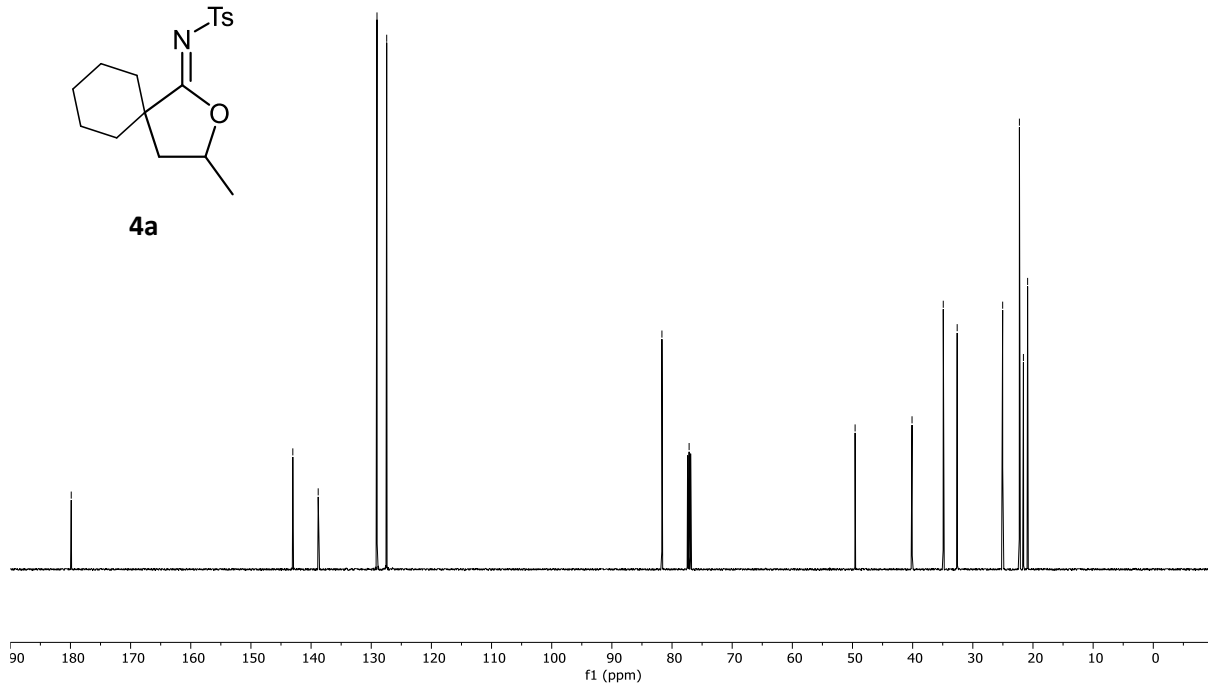

$^1\text{H}$ - $^{13}\text{C}$  HSQC

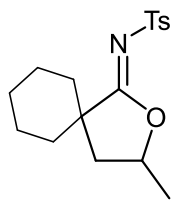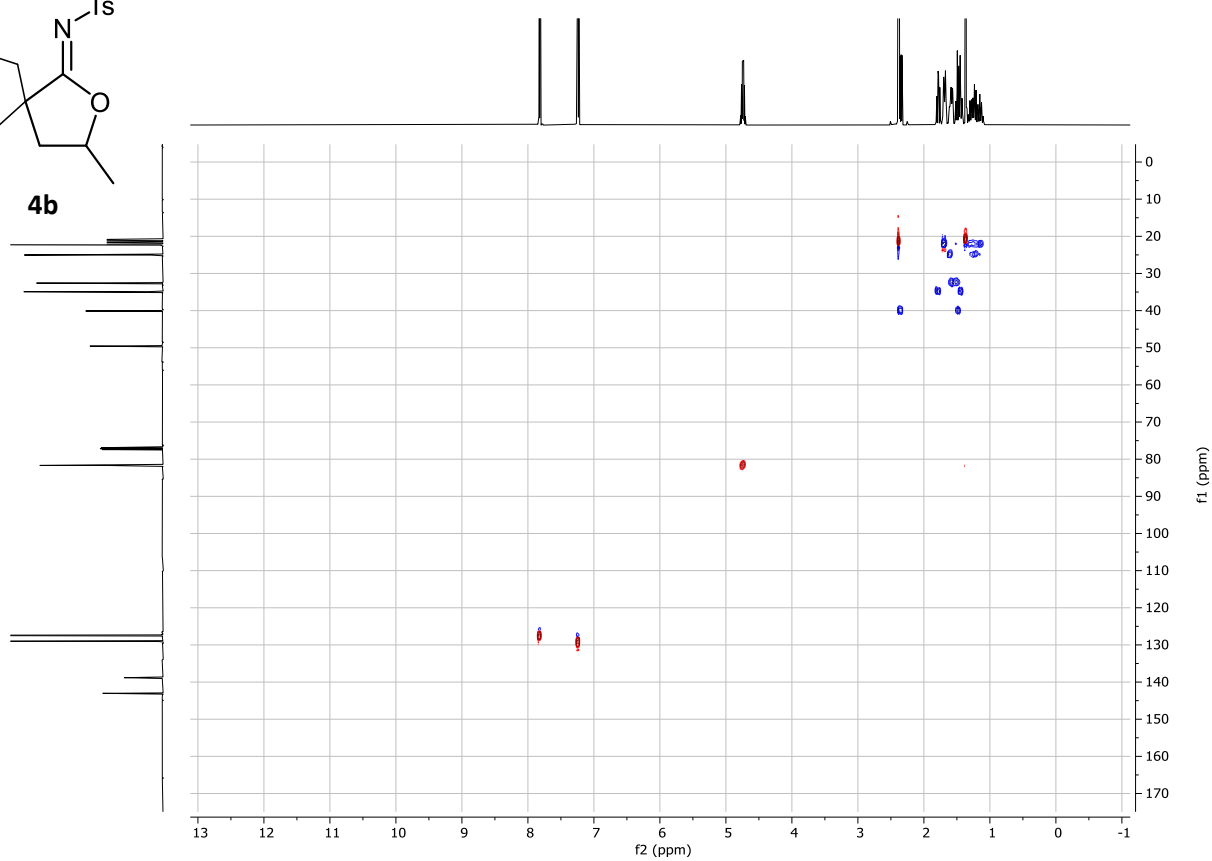

# <sup>1</sup>H NMR (400 MHz, CDCl<sub>3</sub>)

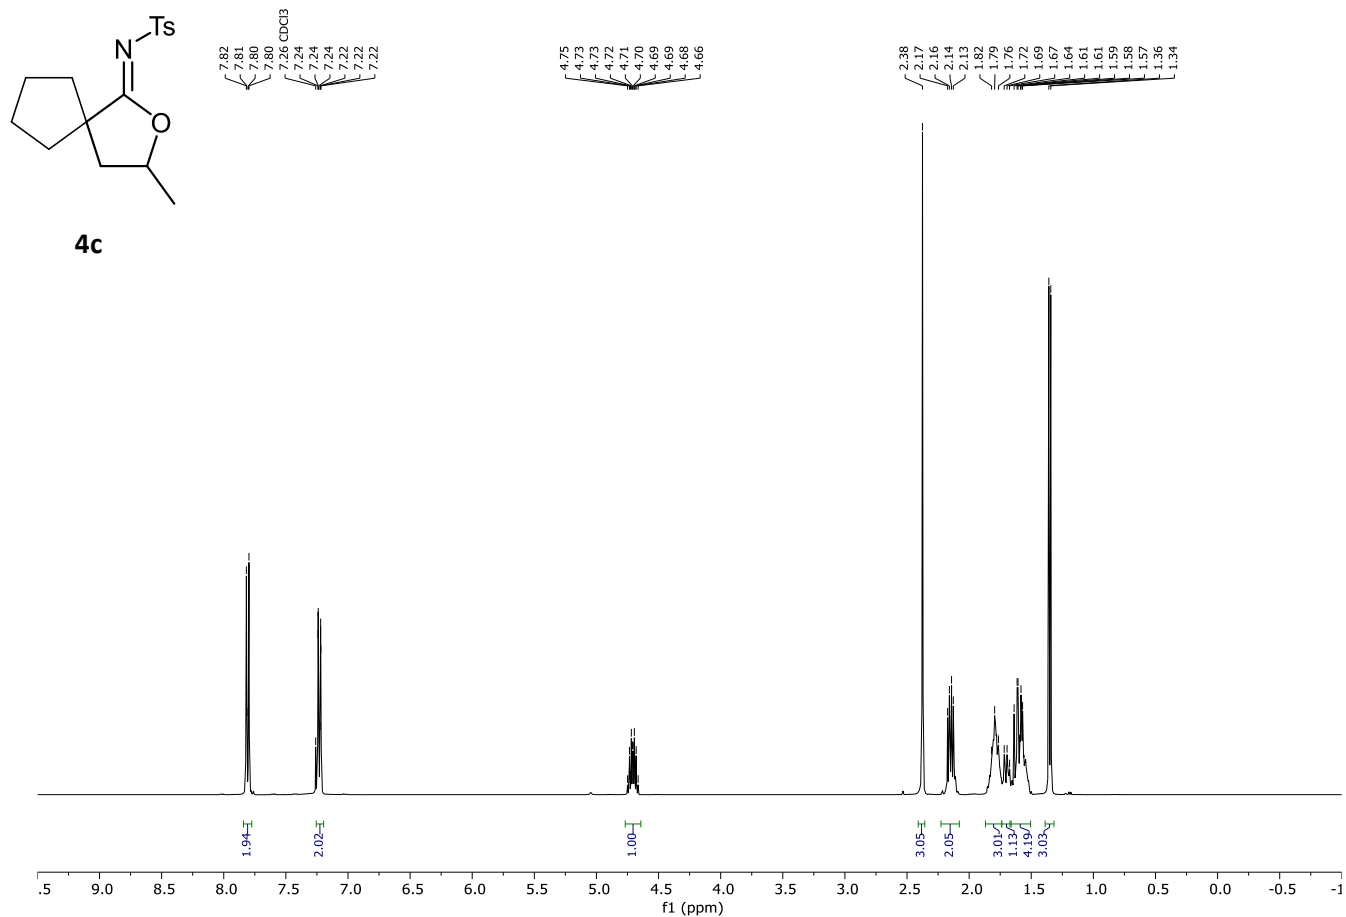

# <sup>13</sup>C NMR (101 MHz, CDCl<sub>3</sub>)

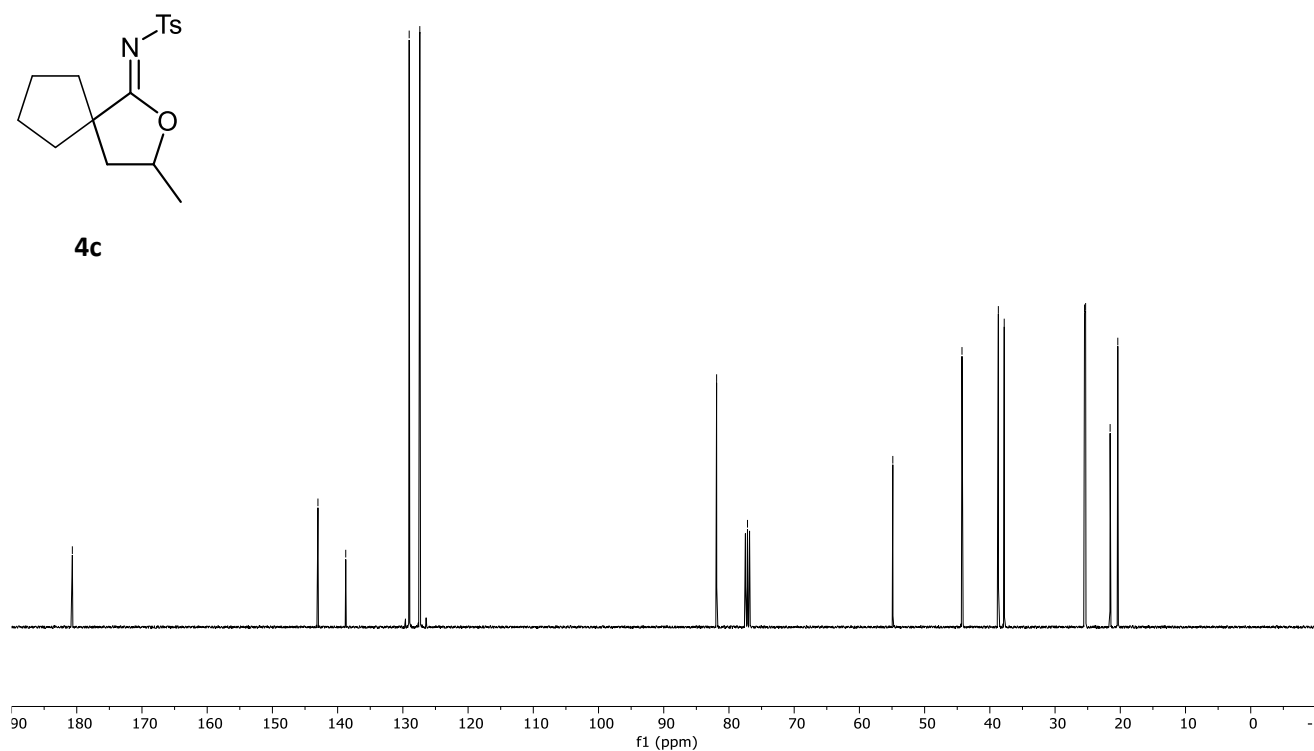

$^1\text{H}$ - $^{13}\text{C}$  HSQC

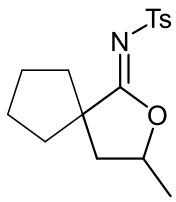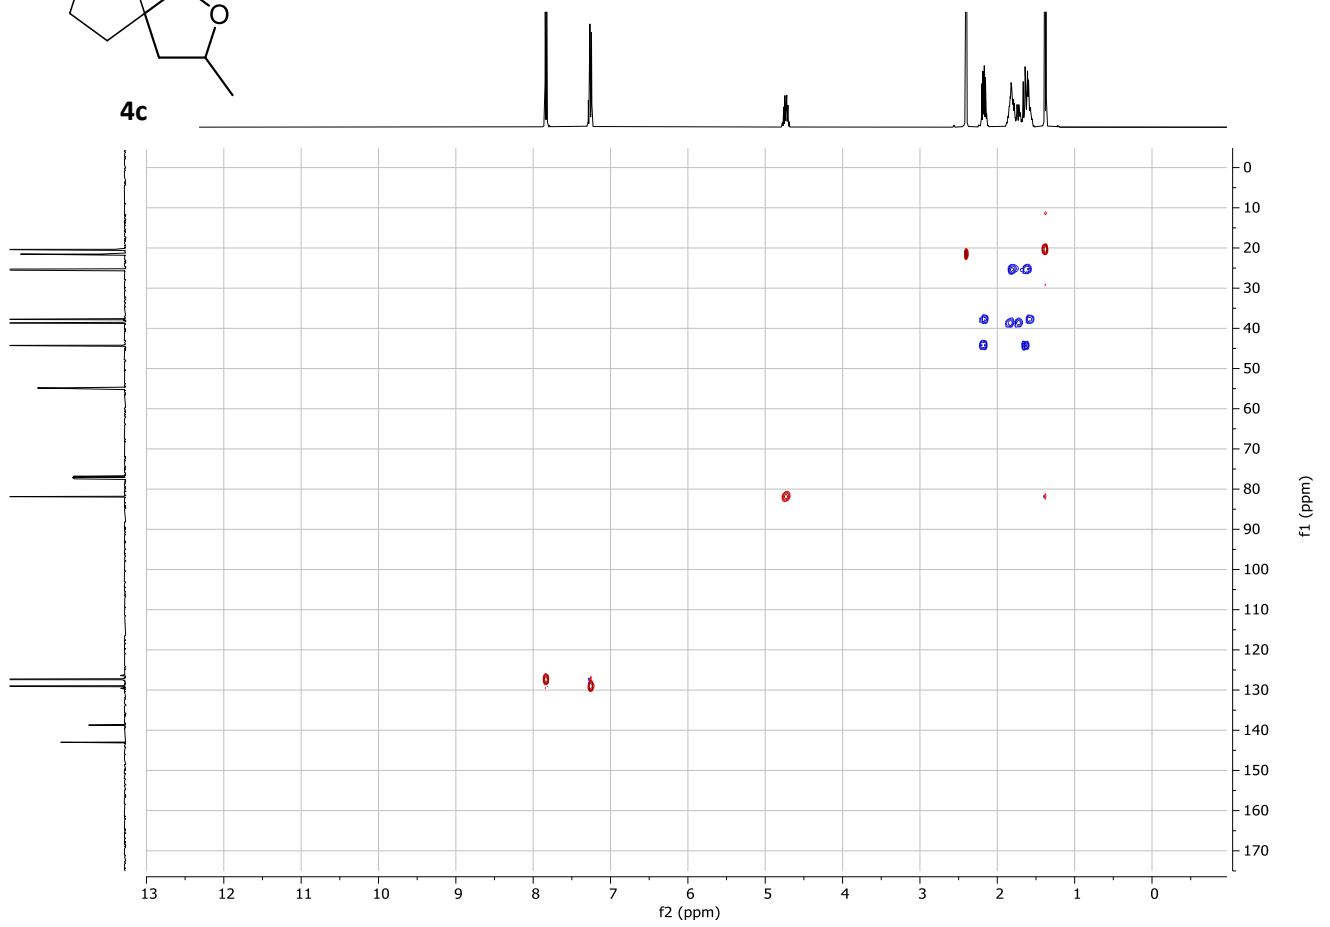

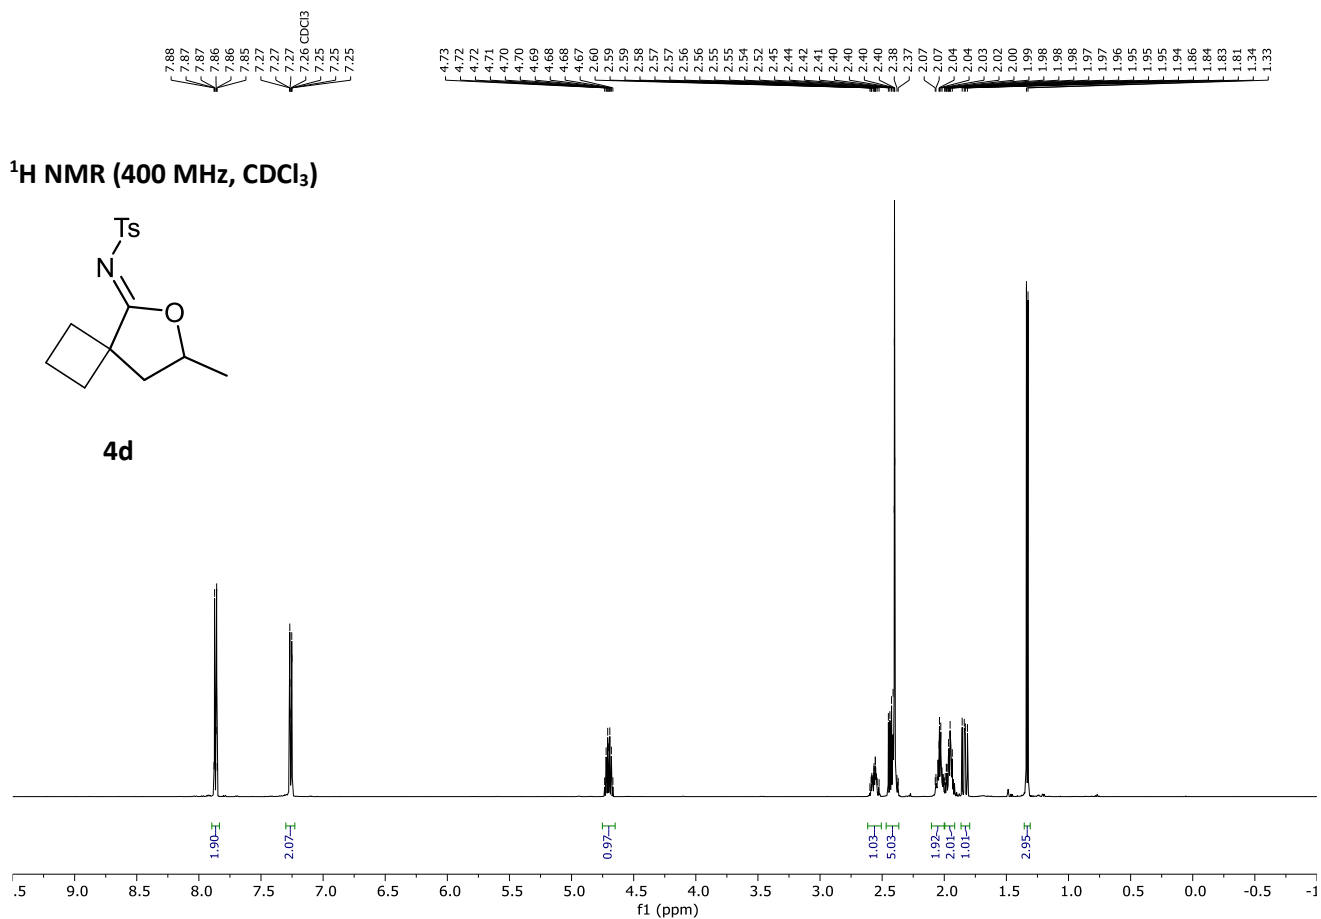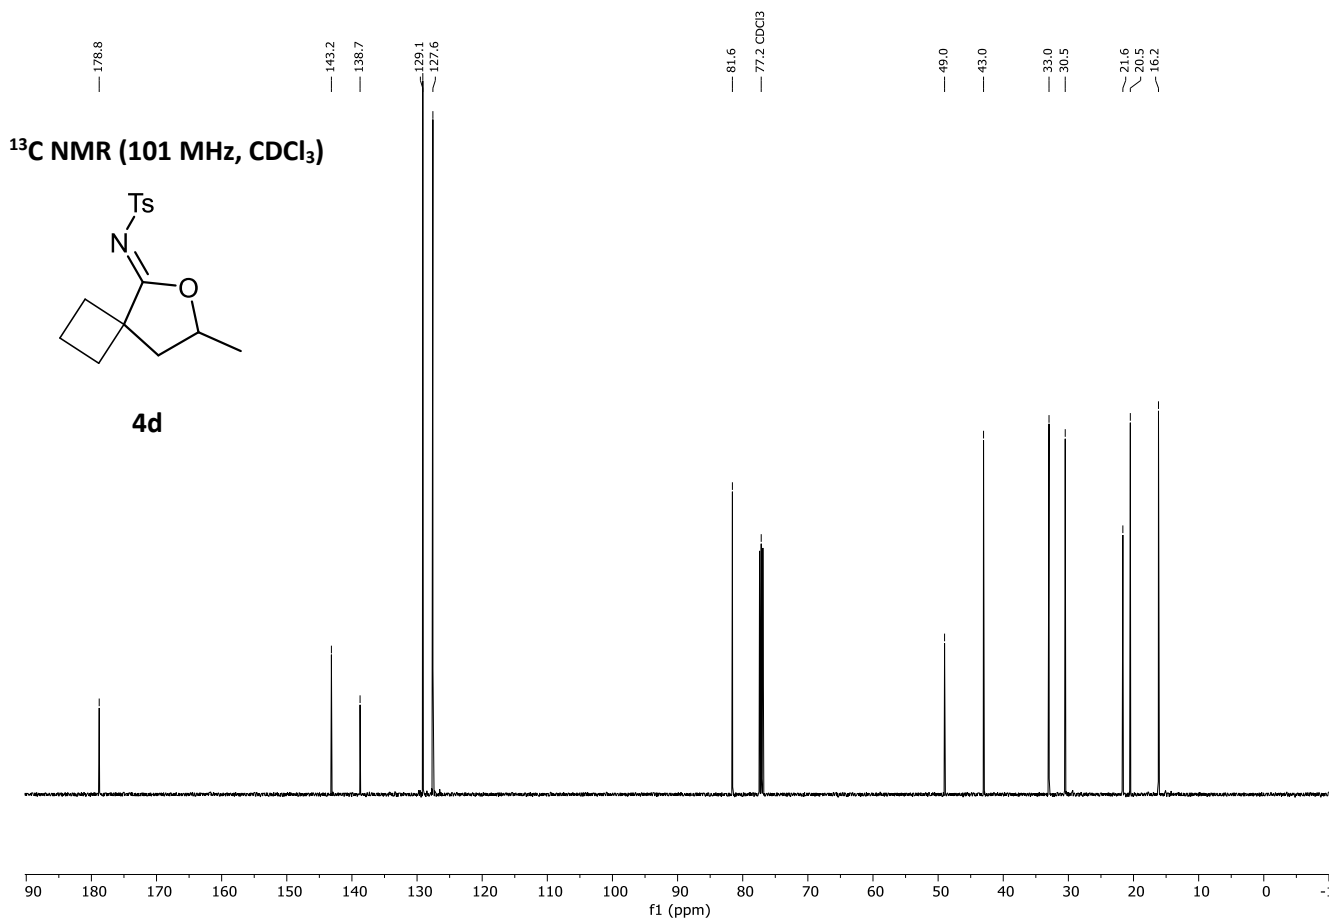

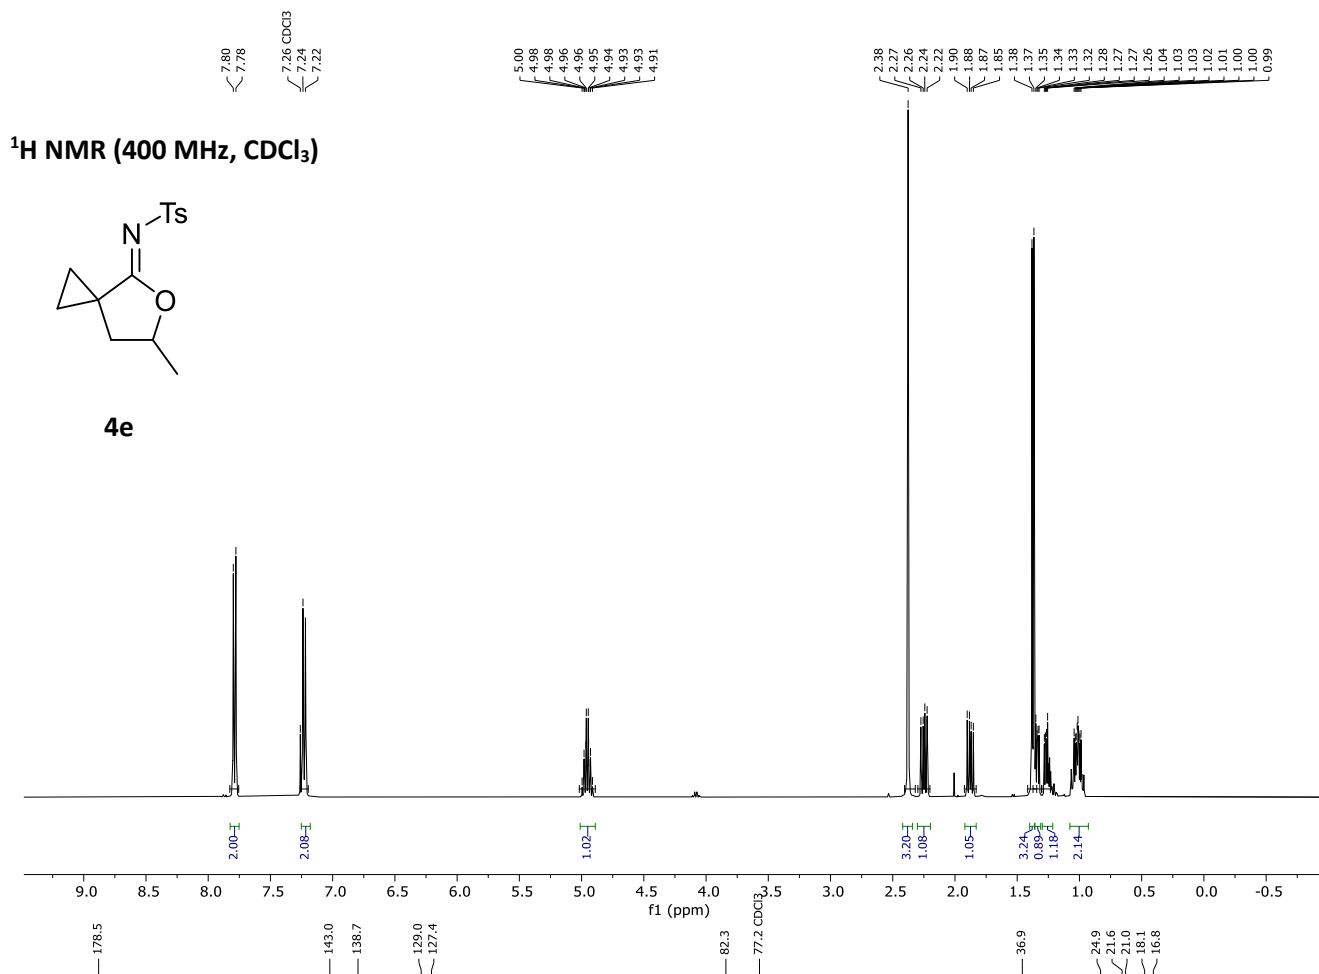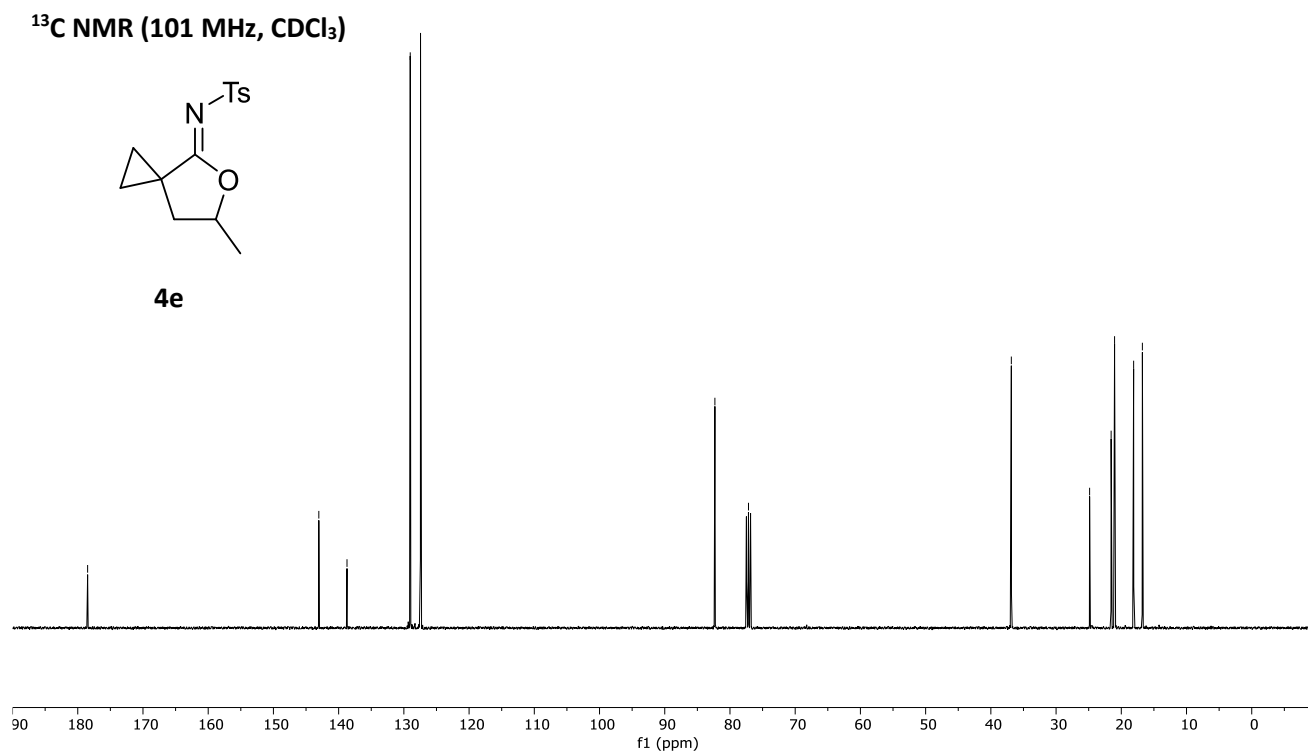



**<sup>1</sup>H NMR (500 MHz, CDCl<sub>3</sub>)**

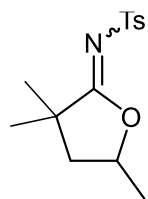

**4f**

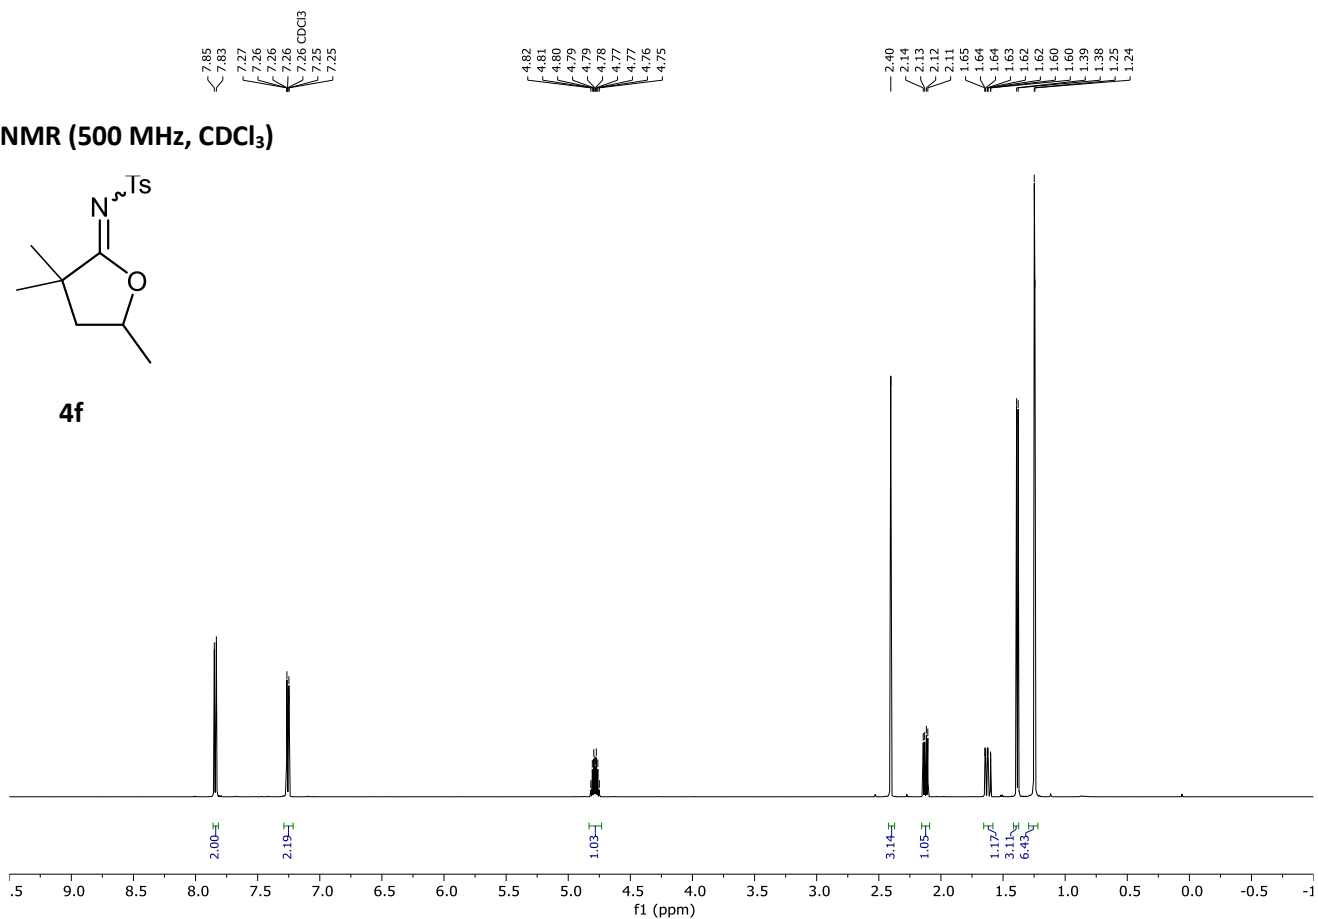

180.0

143.2

136.7

129.1

127.6

81.3

77.2 CDCl<sub>3</sub>

45.1

44.7

25.9

25.7

21.7

20.7

**<sup>13</sup>C NMR (126 MHz, CDCl<sub>3</sub>)**

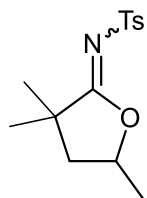

**4f**

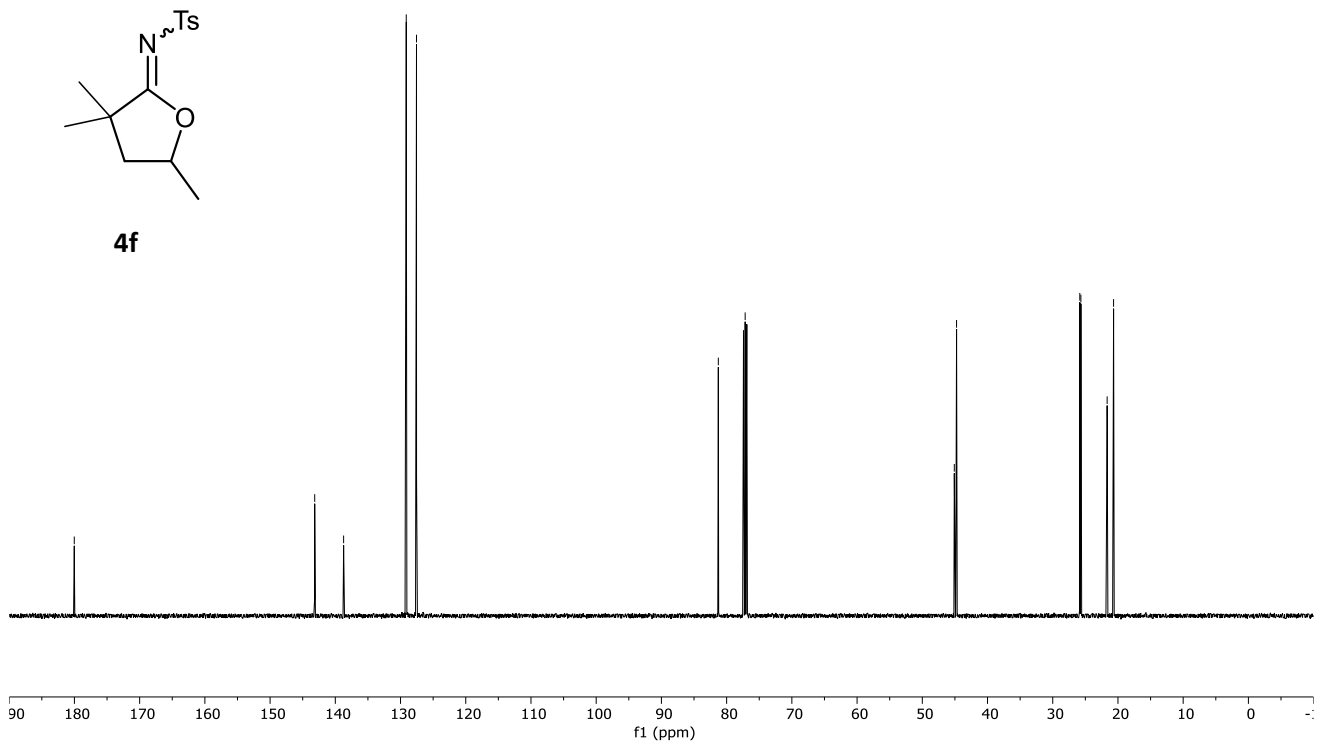

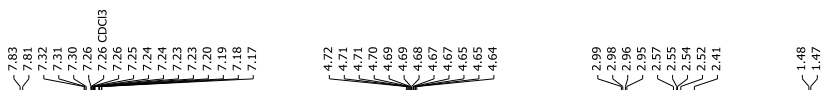

<sup>1</sup>H NMR (400 MHz, CDCl<sub>3</sub>)

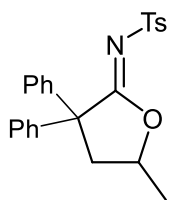

**4g**

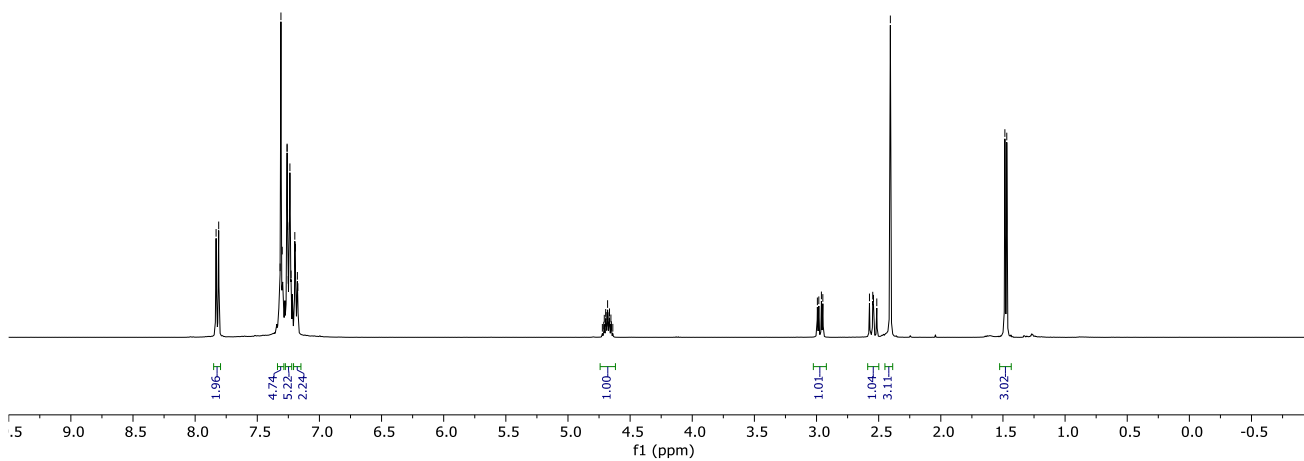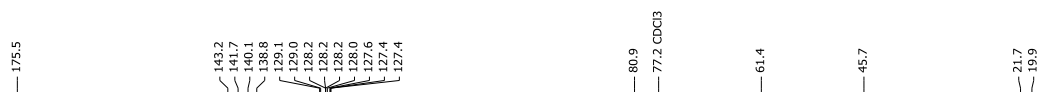

<sup>13</sup>C NMR (101 MHz, CDCl<sub>3</sub>)

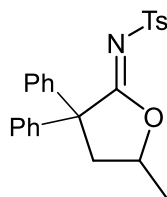

**4g**

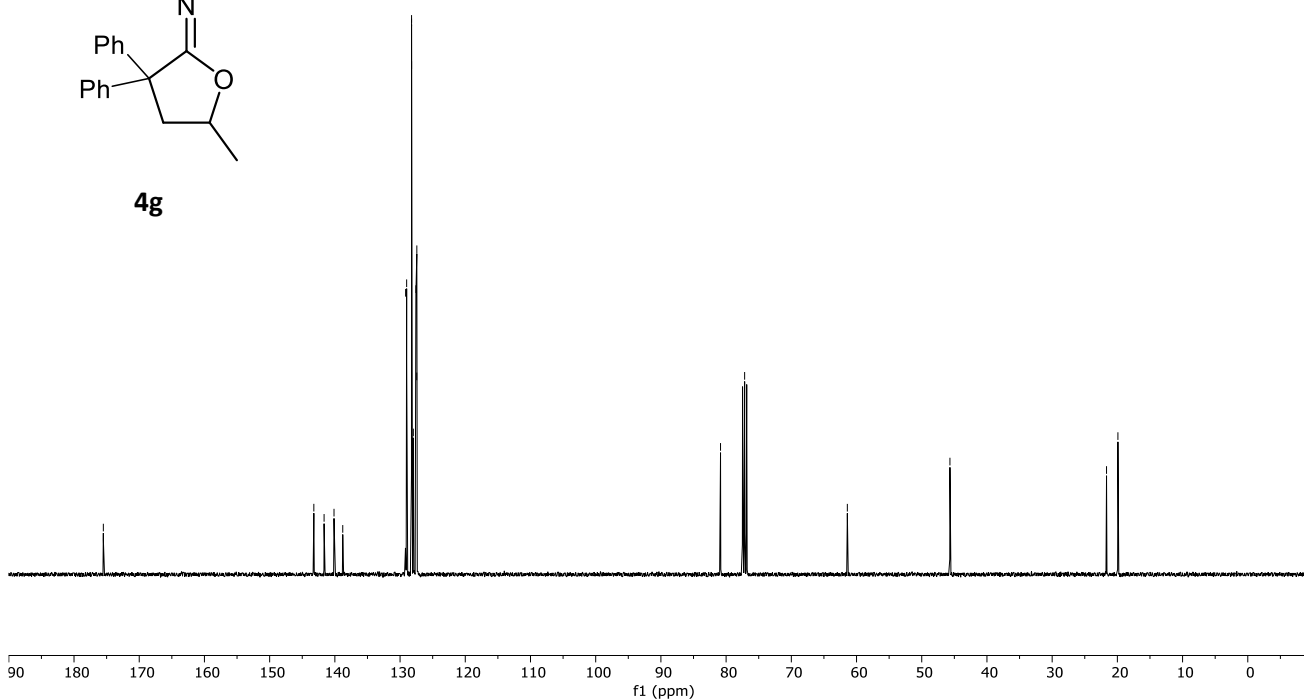

$^1\text{H}$ - $^{13}\text{C}$  HSQC

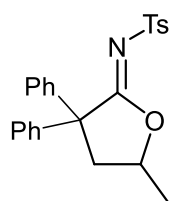

4g

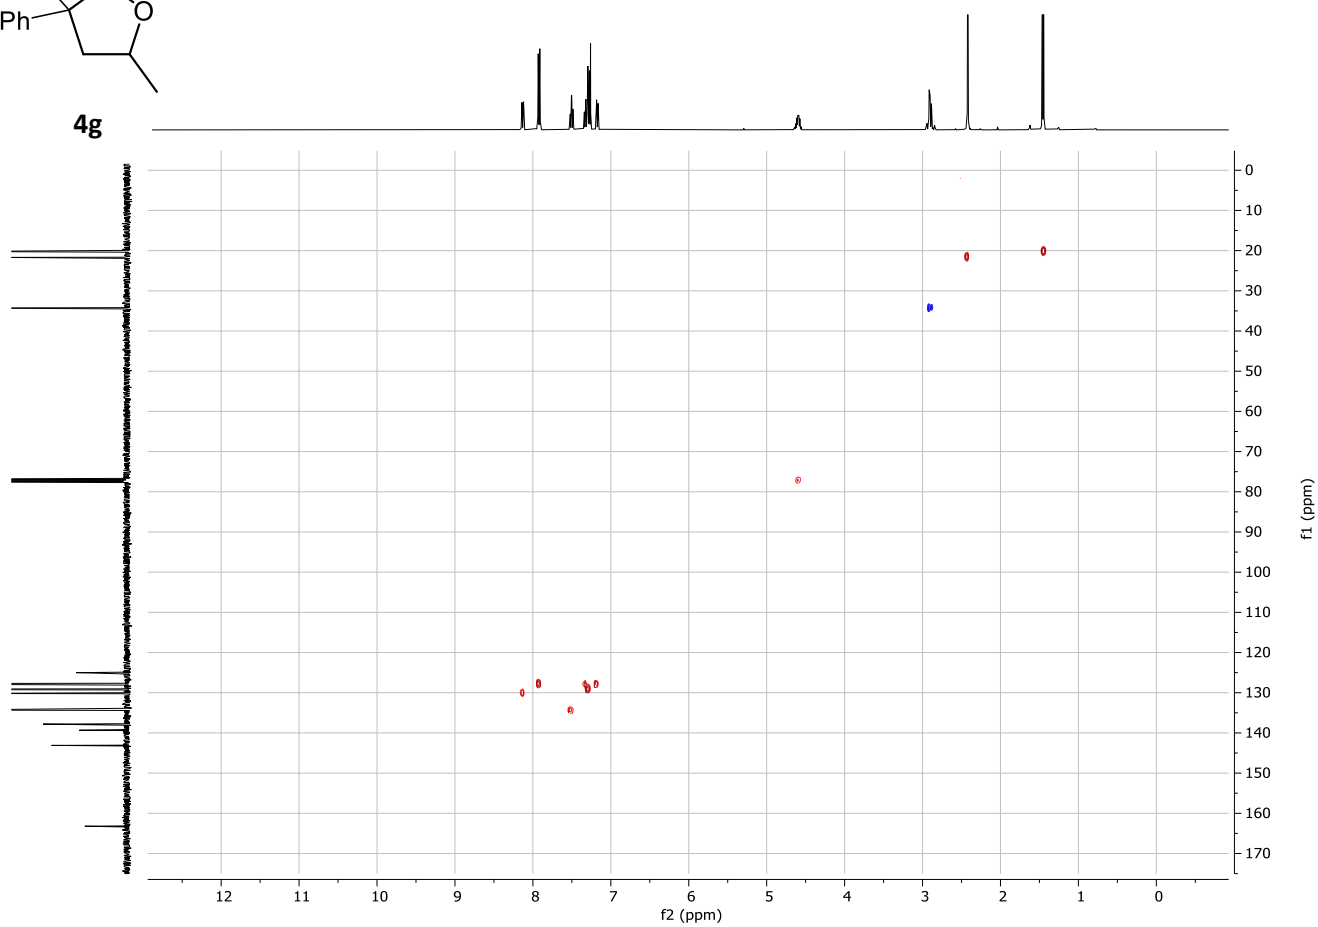

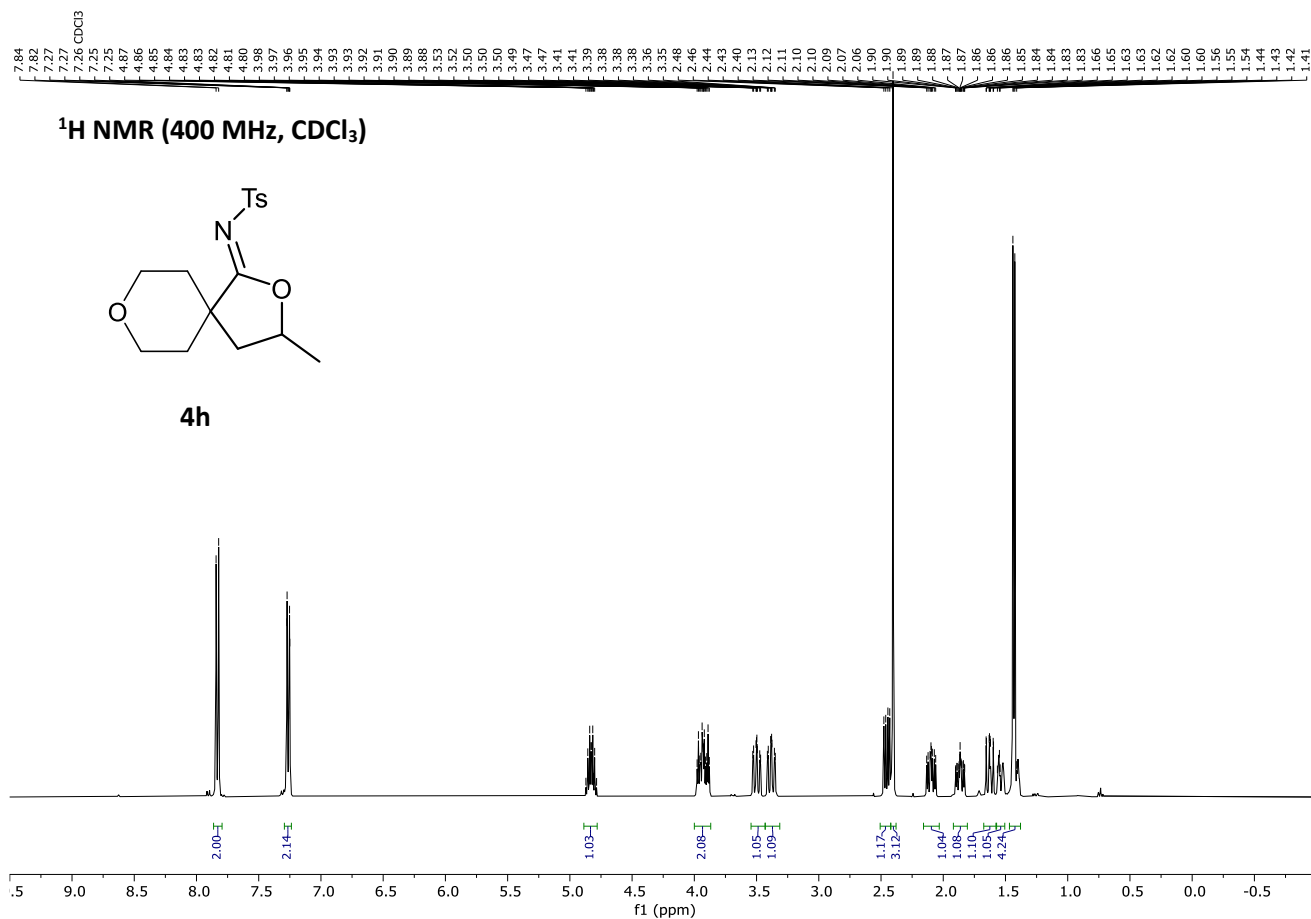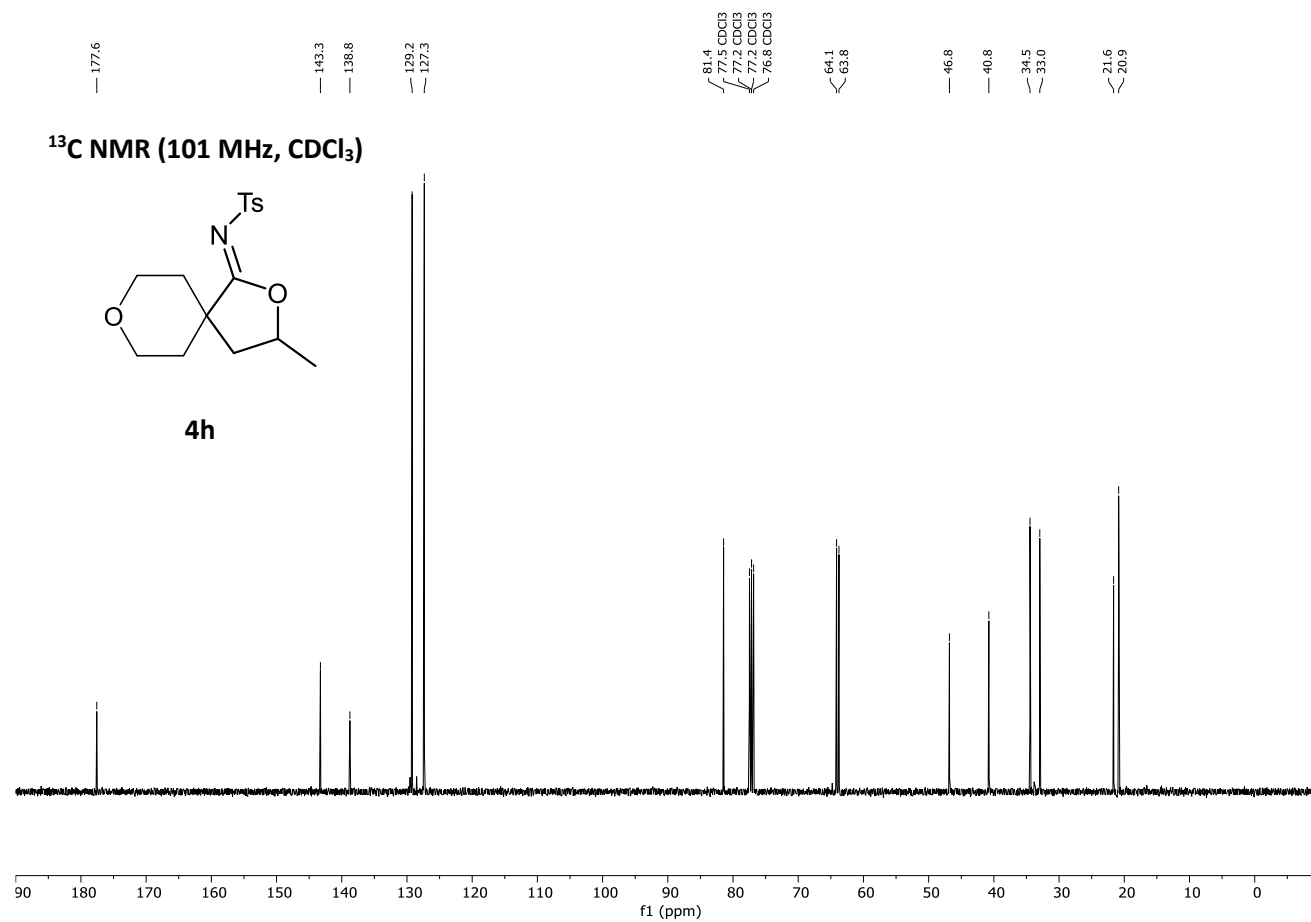

$^1\text{H}$ - $^{13}\text{C}$  HSQC

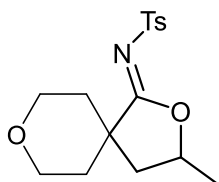

4g

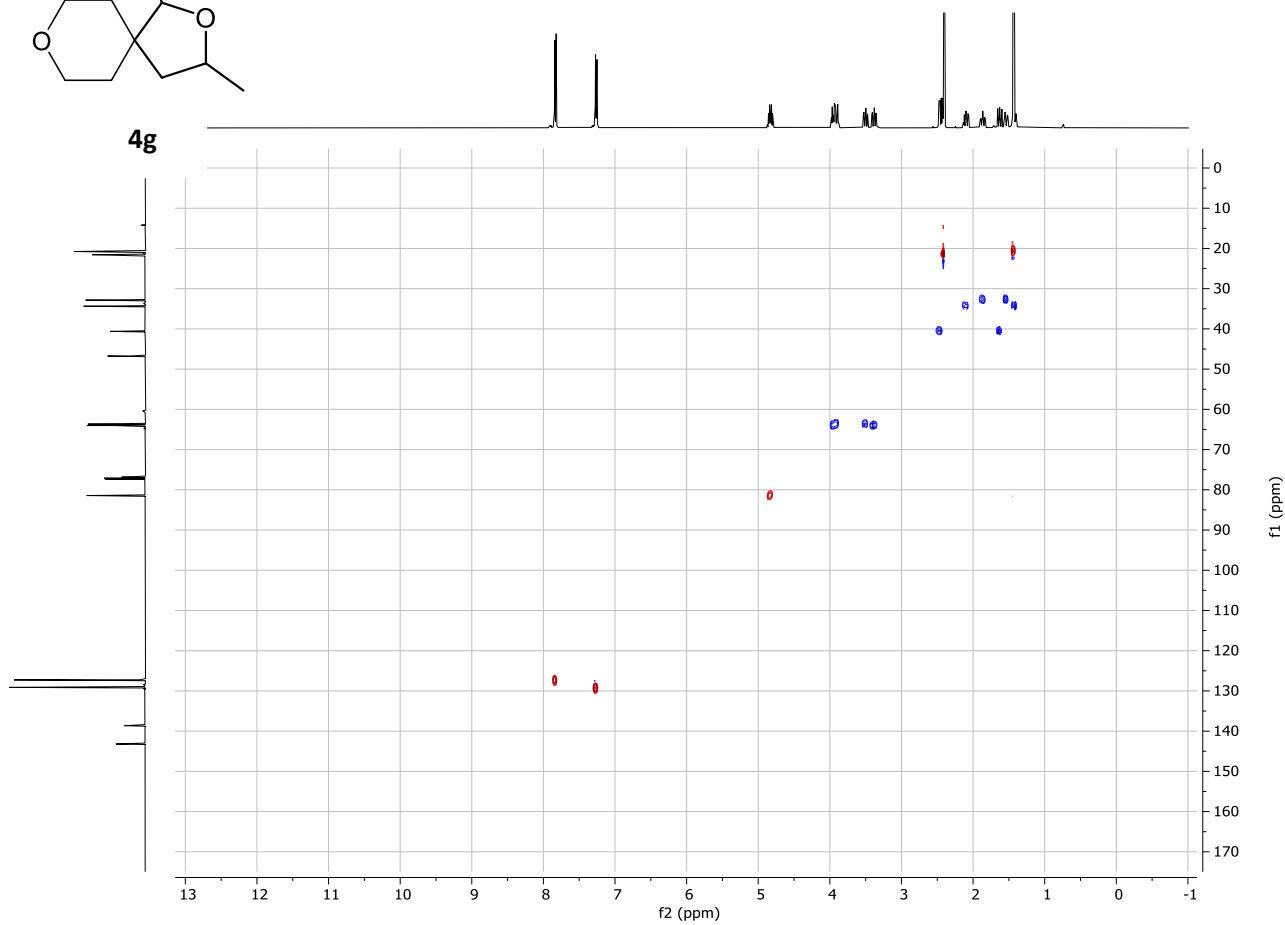

**<sup>1</sup>H NMR (400 MHz, CDCl<sub>3</sub>)**

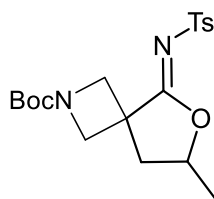

**4i**

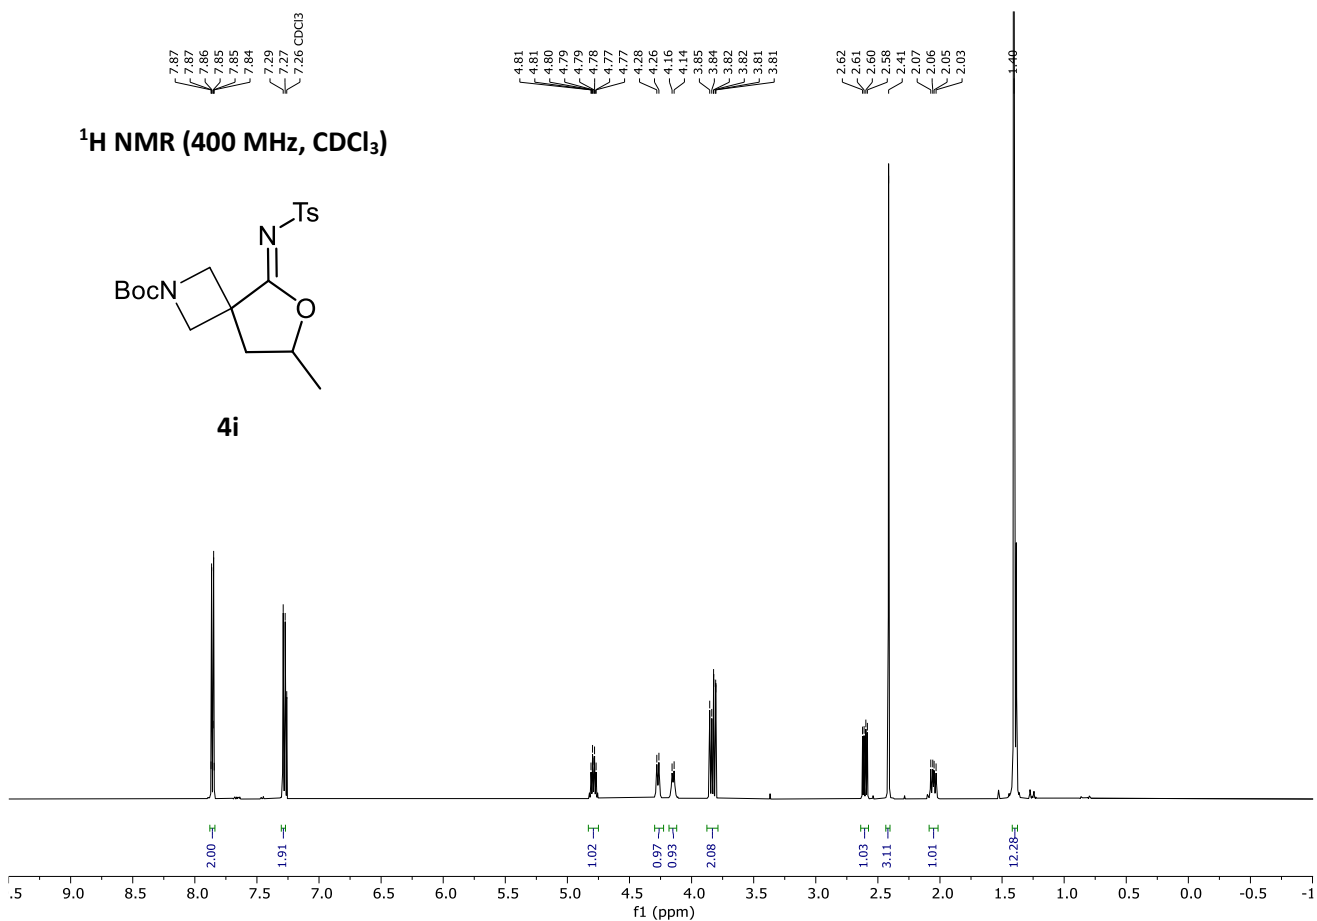

**<sup>13</sup>C NMR (101 MHz, CDCl<sub>3</sub>)**

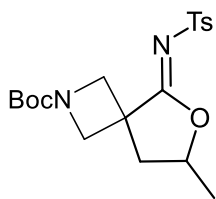

**4i**

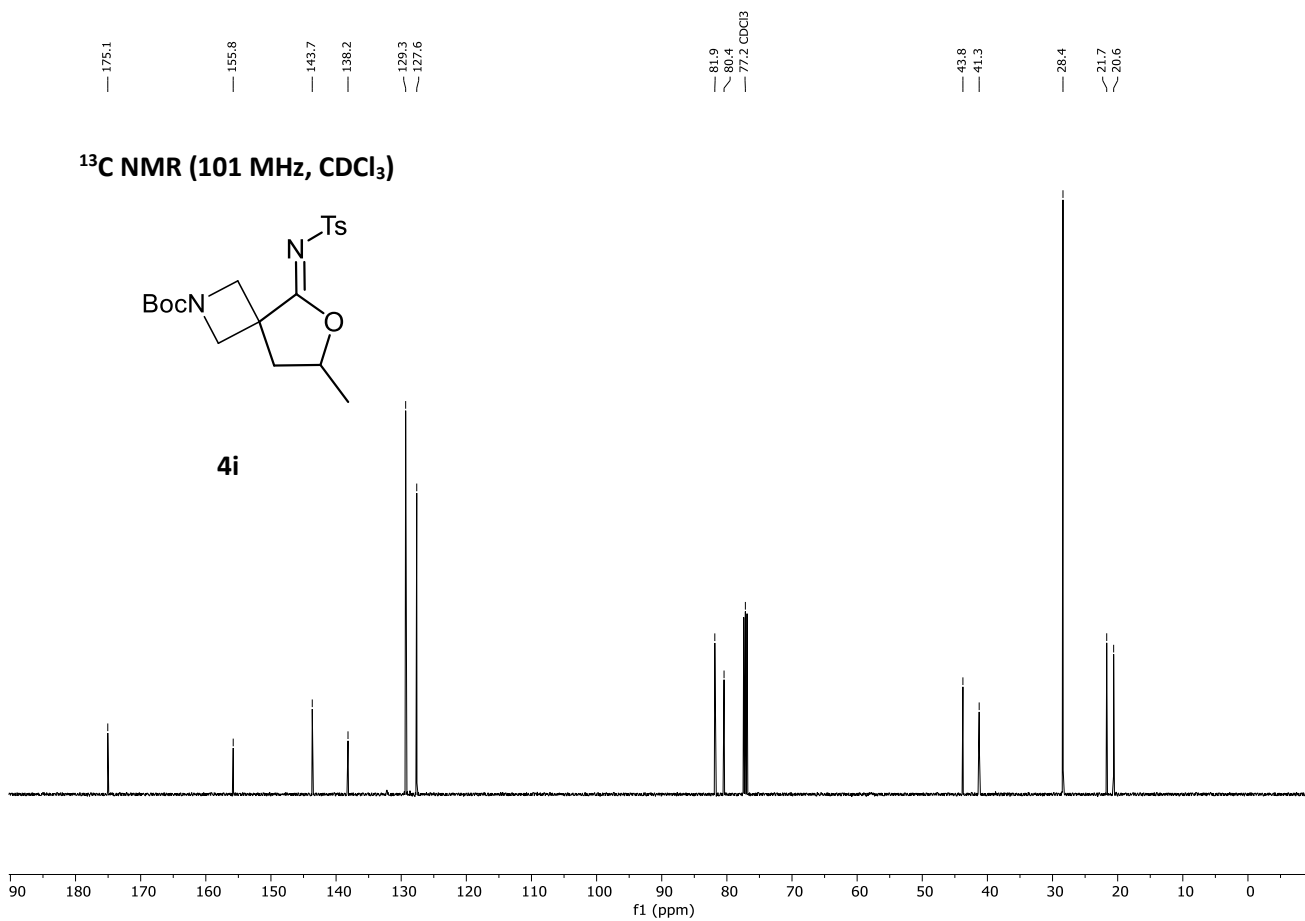

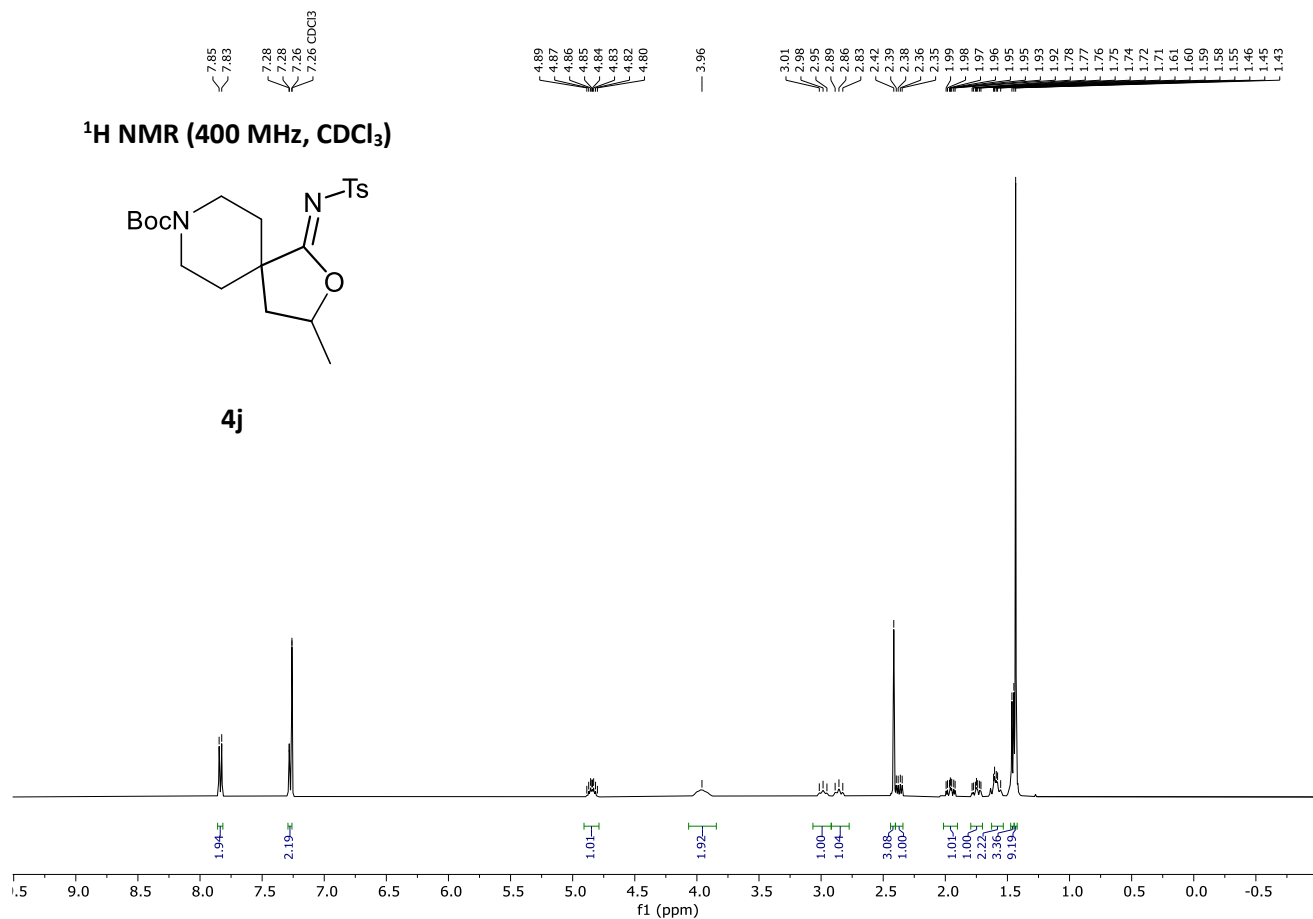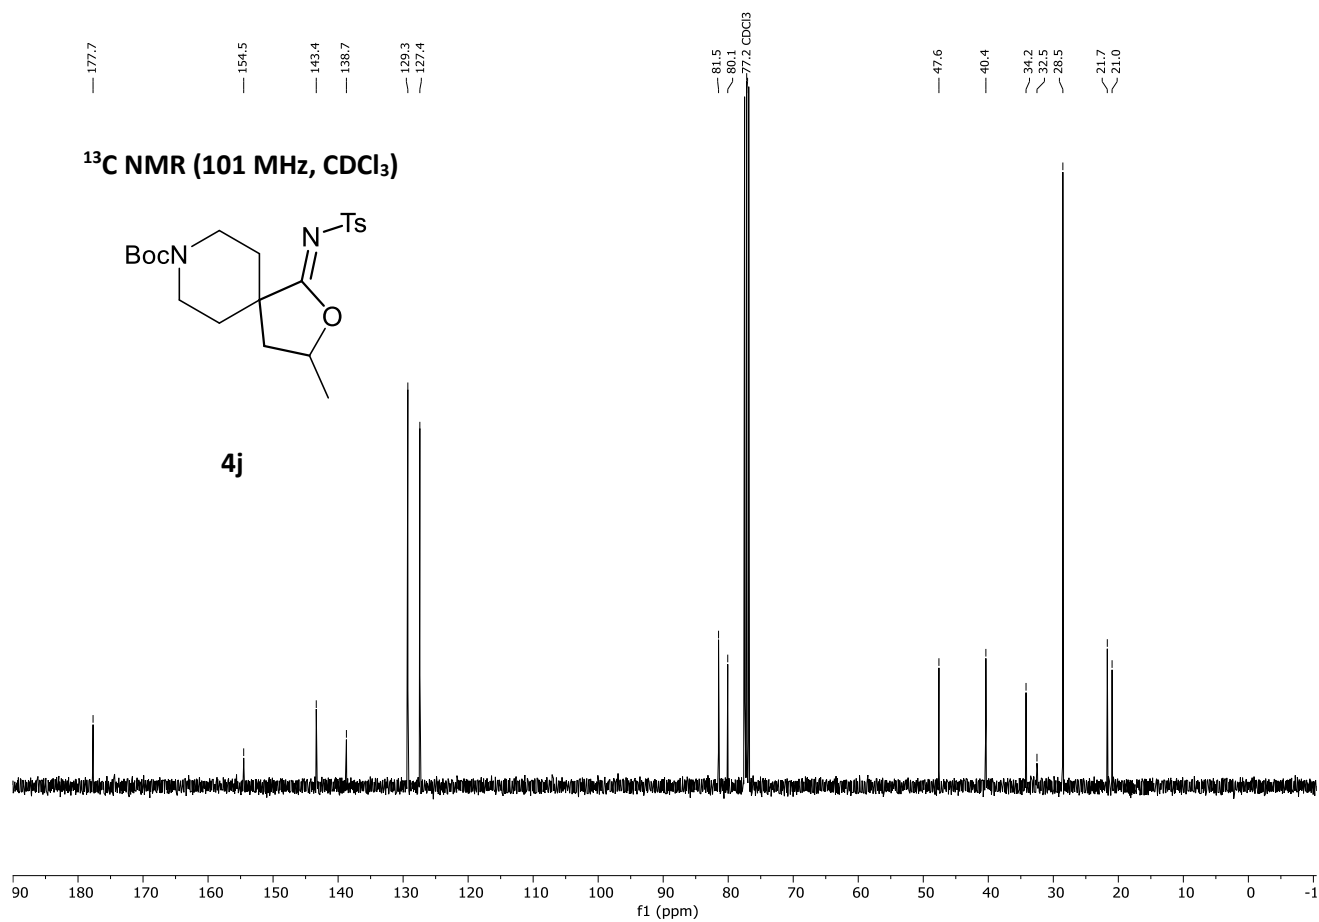

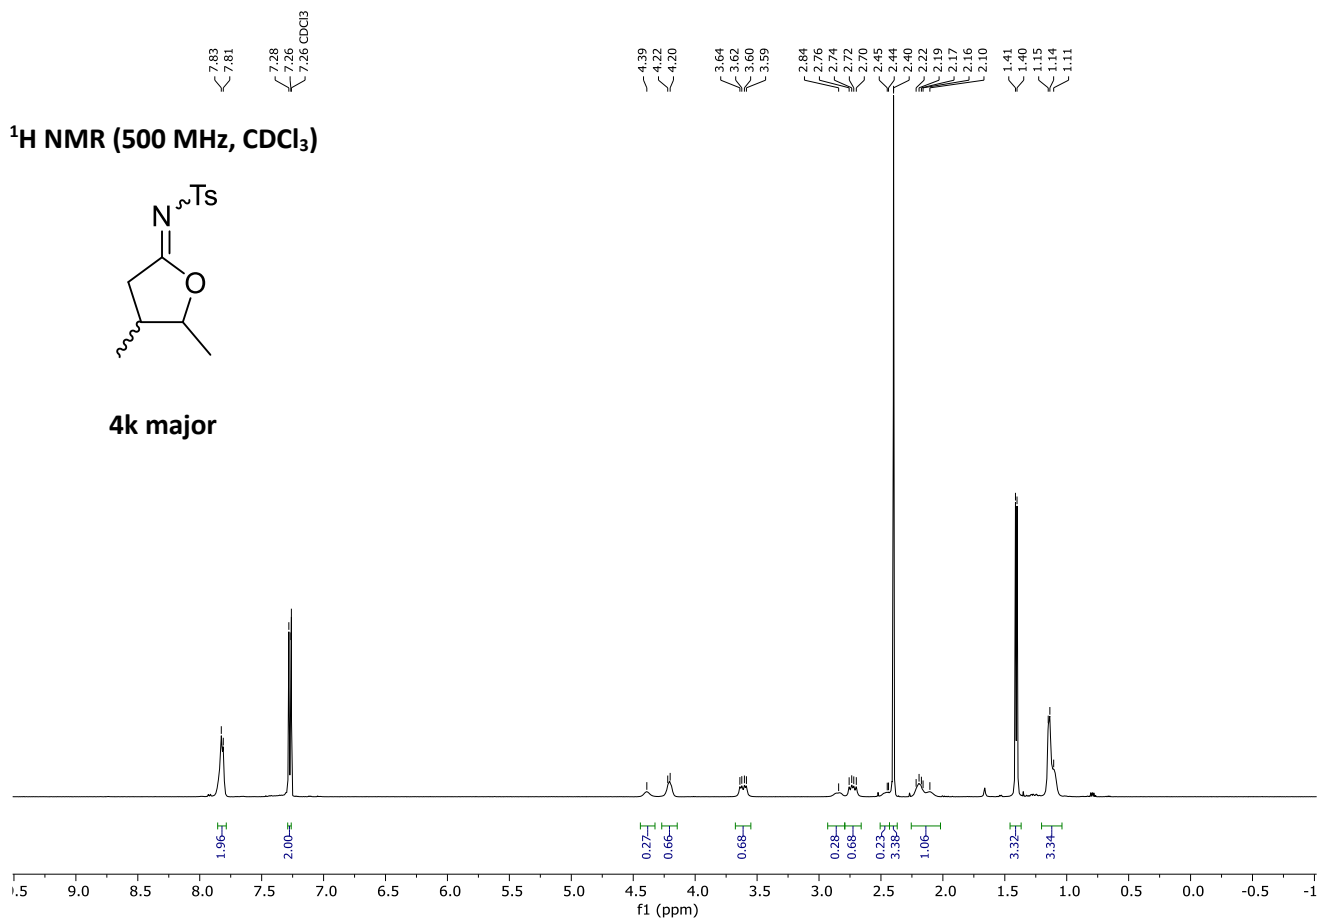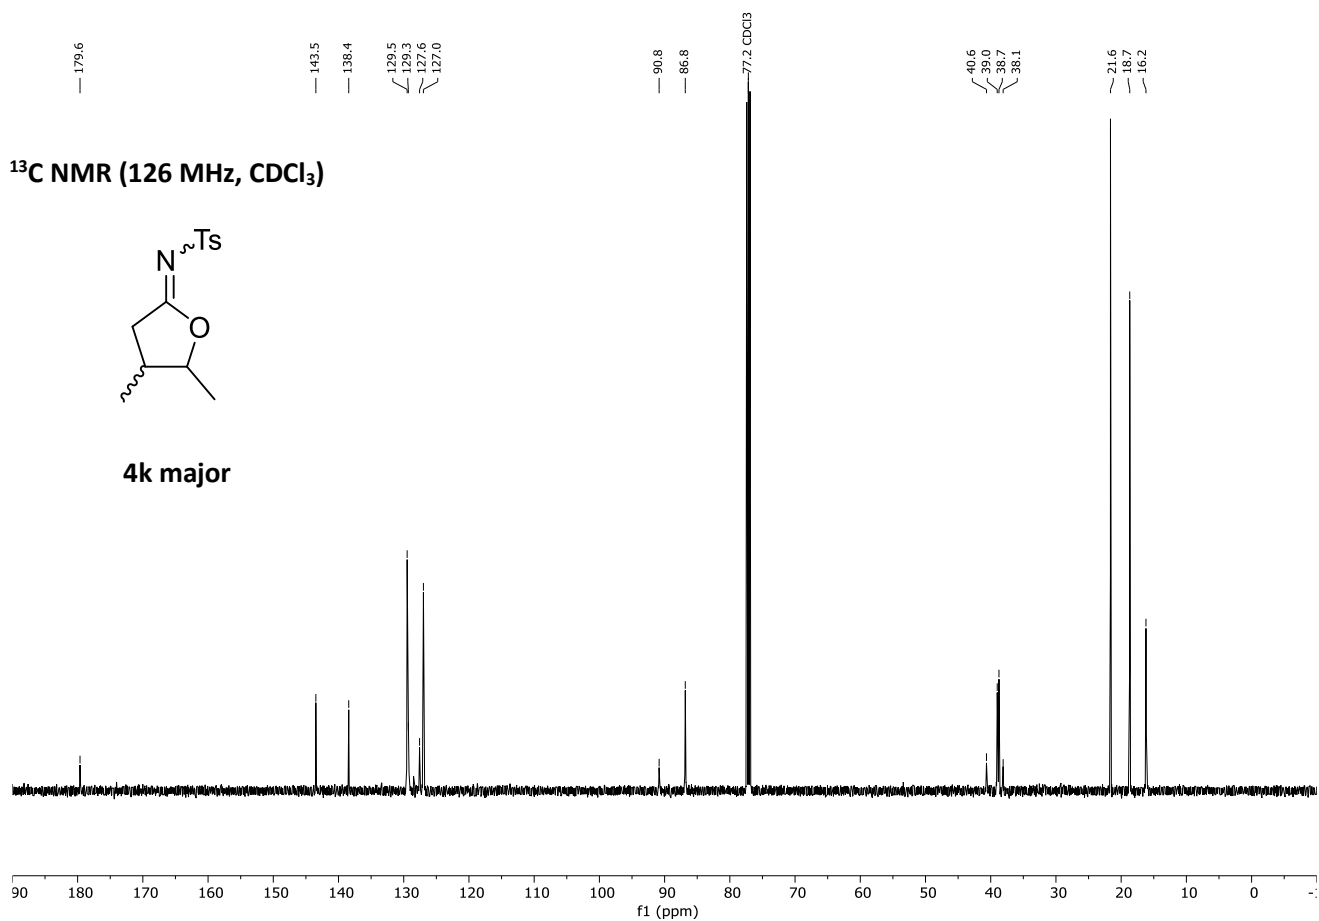



$^1\text{H}$ - $^{13}\text{C}$  HSQC

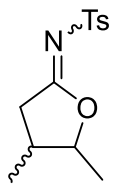

4k major

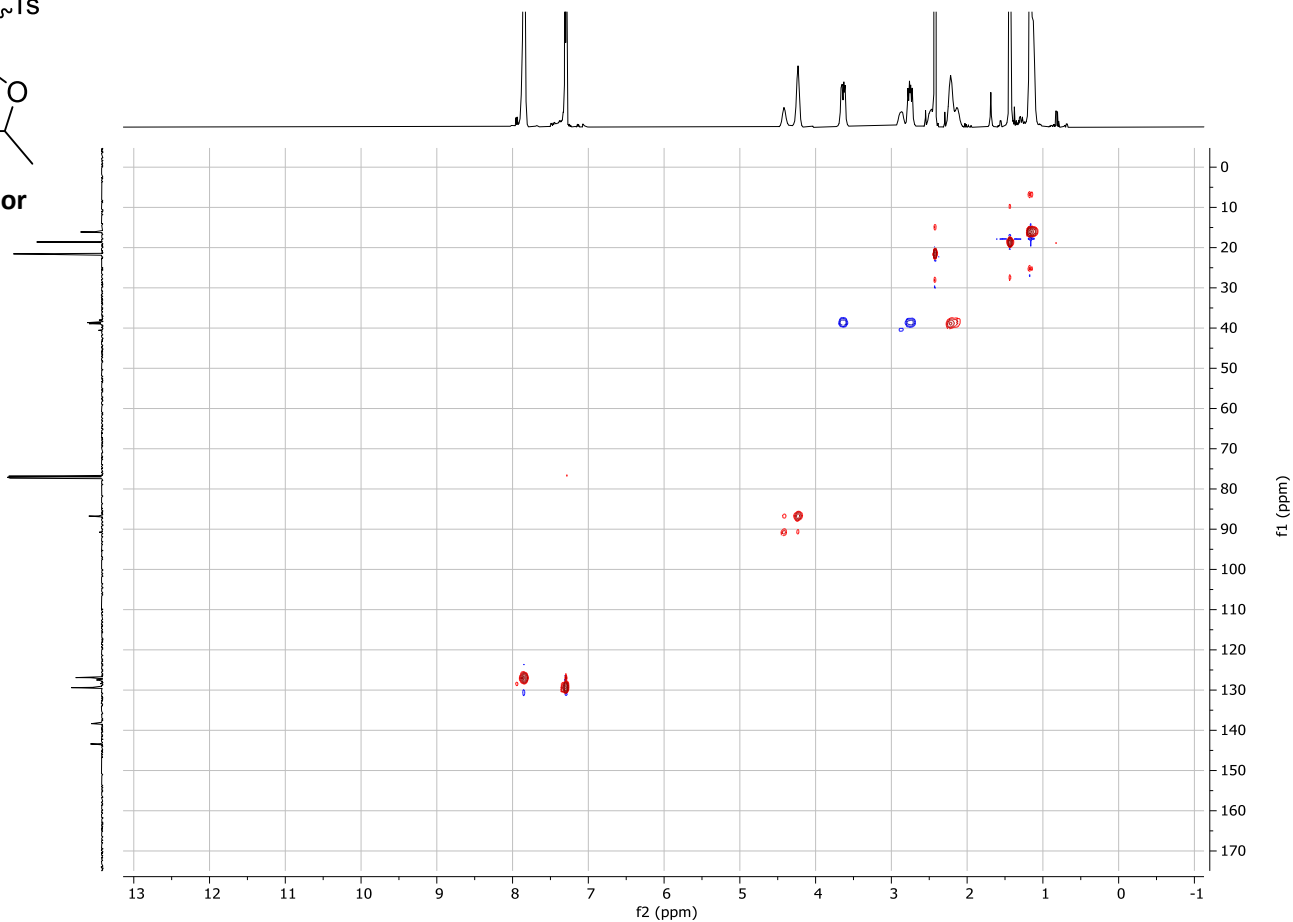

**<sup>1</sup>H NMR (500 MHz, CDCl<sub>3</sub>)**

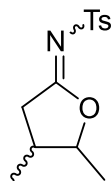

4k minor

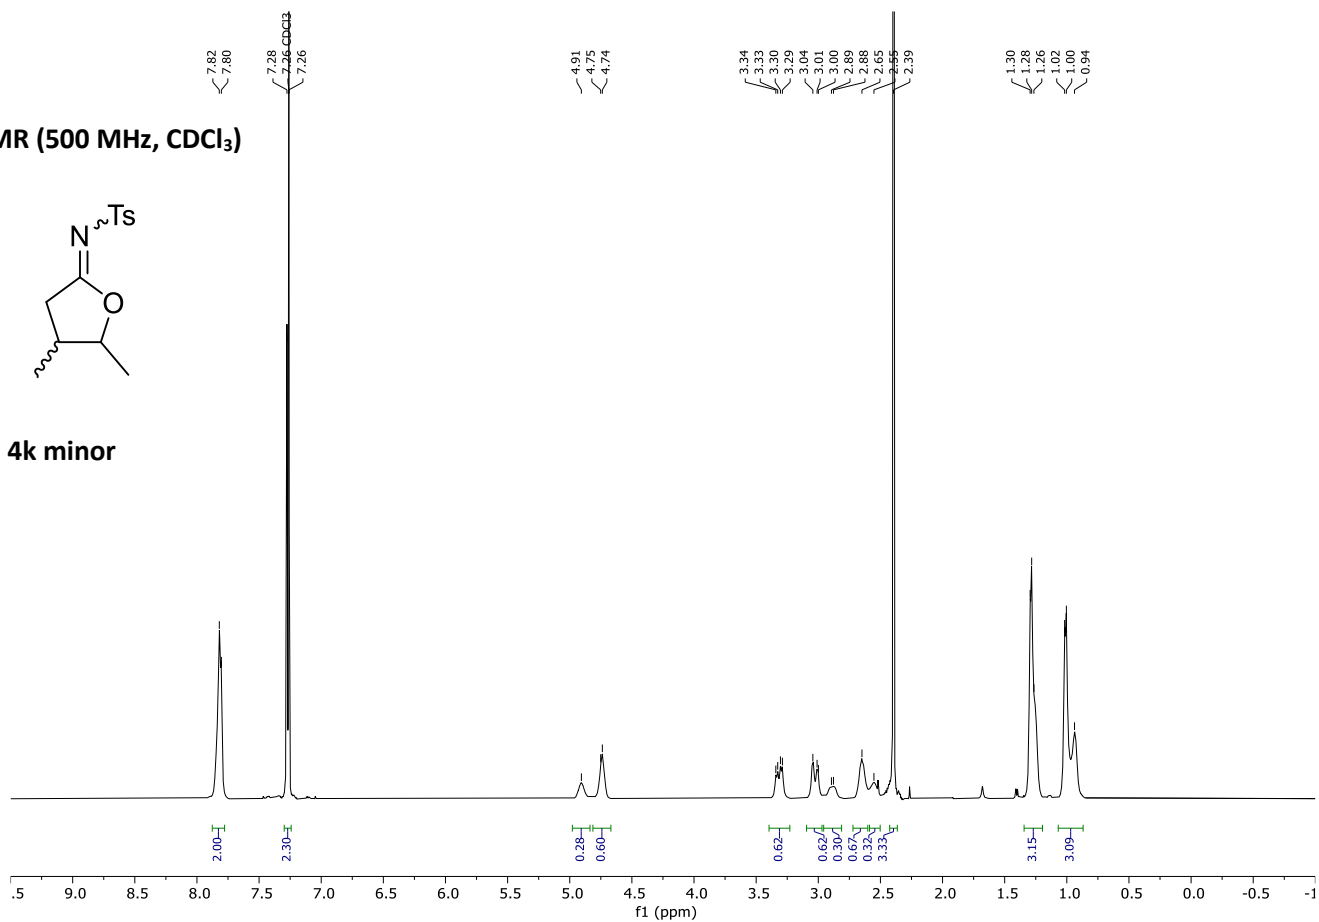

**<sup>13</sup>C NMR (126 MHz, CDCl<sub>3</sub>)**

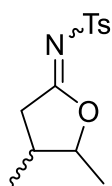

4k minor

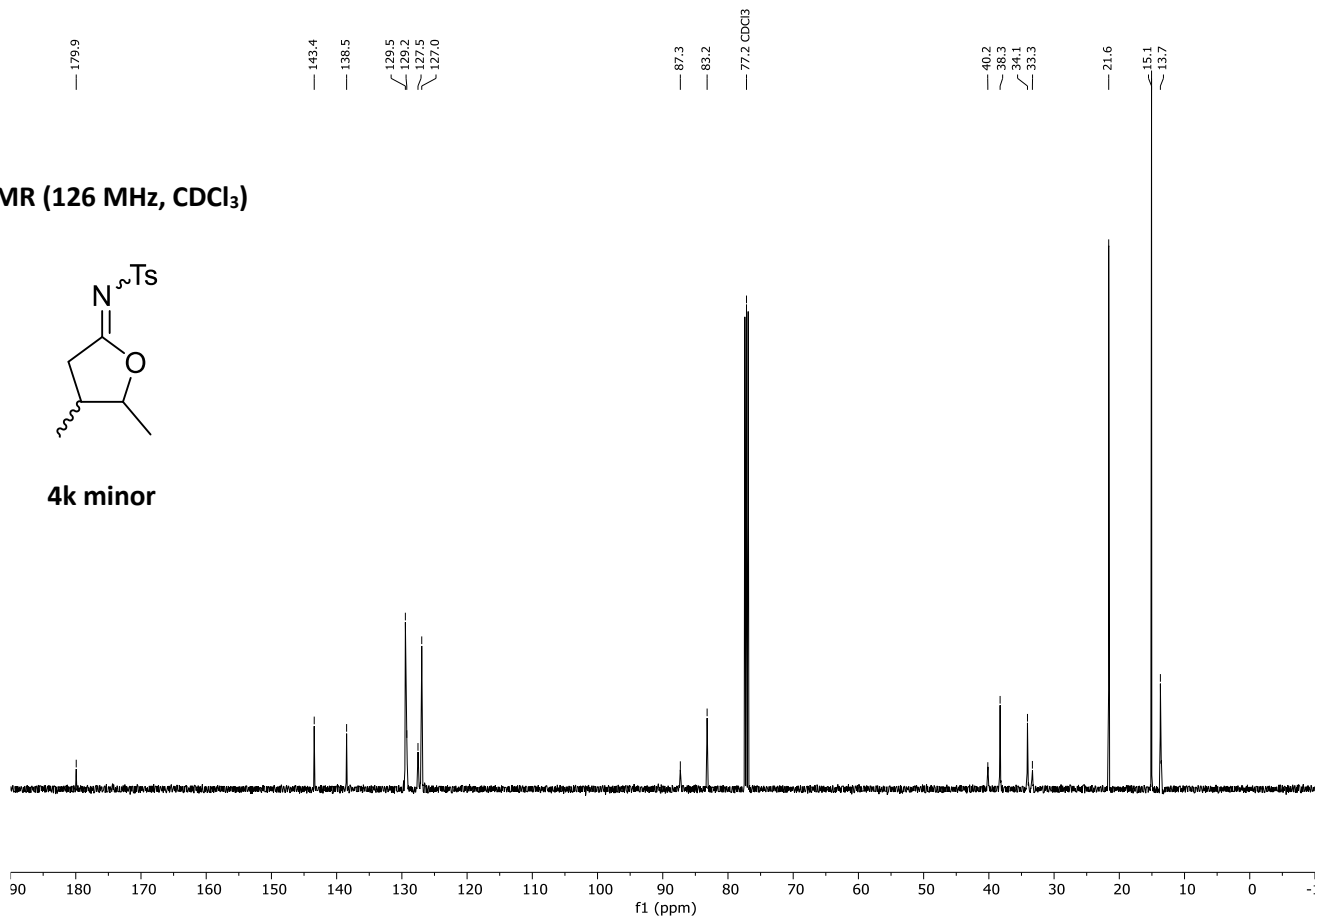

$^1\text{H}$ - $^{13}\text{C}$  HSQC

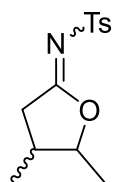

4k minor

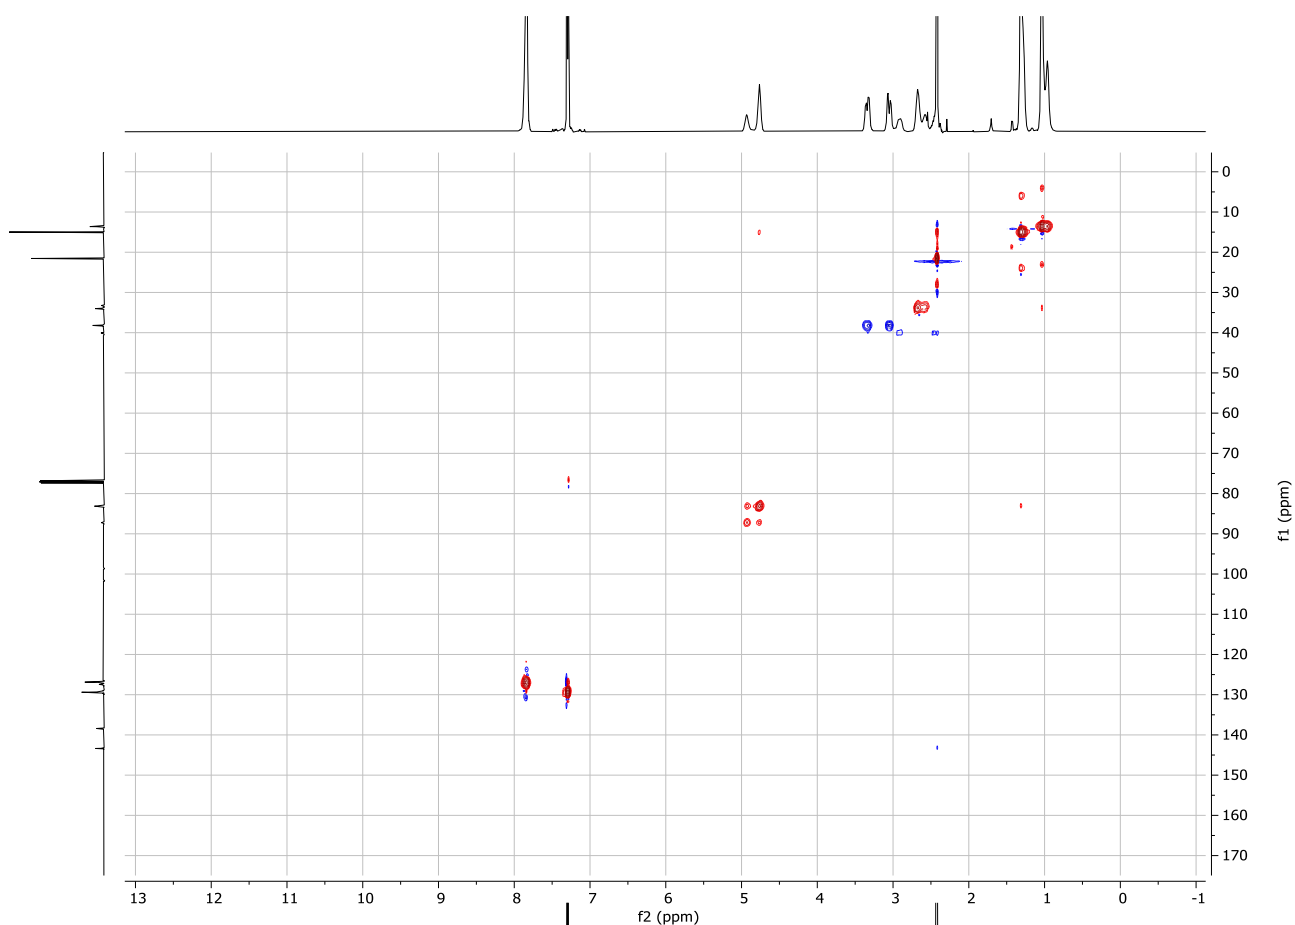

$^1\text{H}$ - $^1\text{H}$  COSY

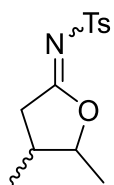

4k minor

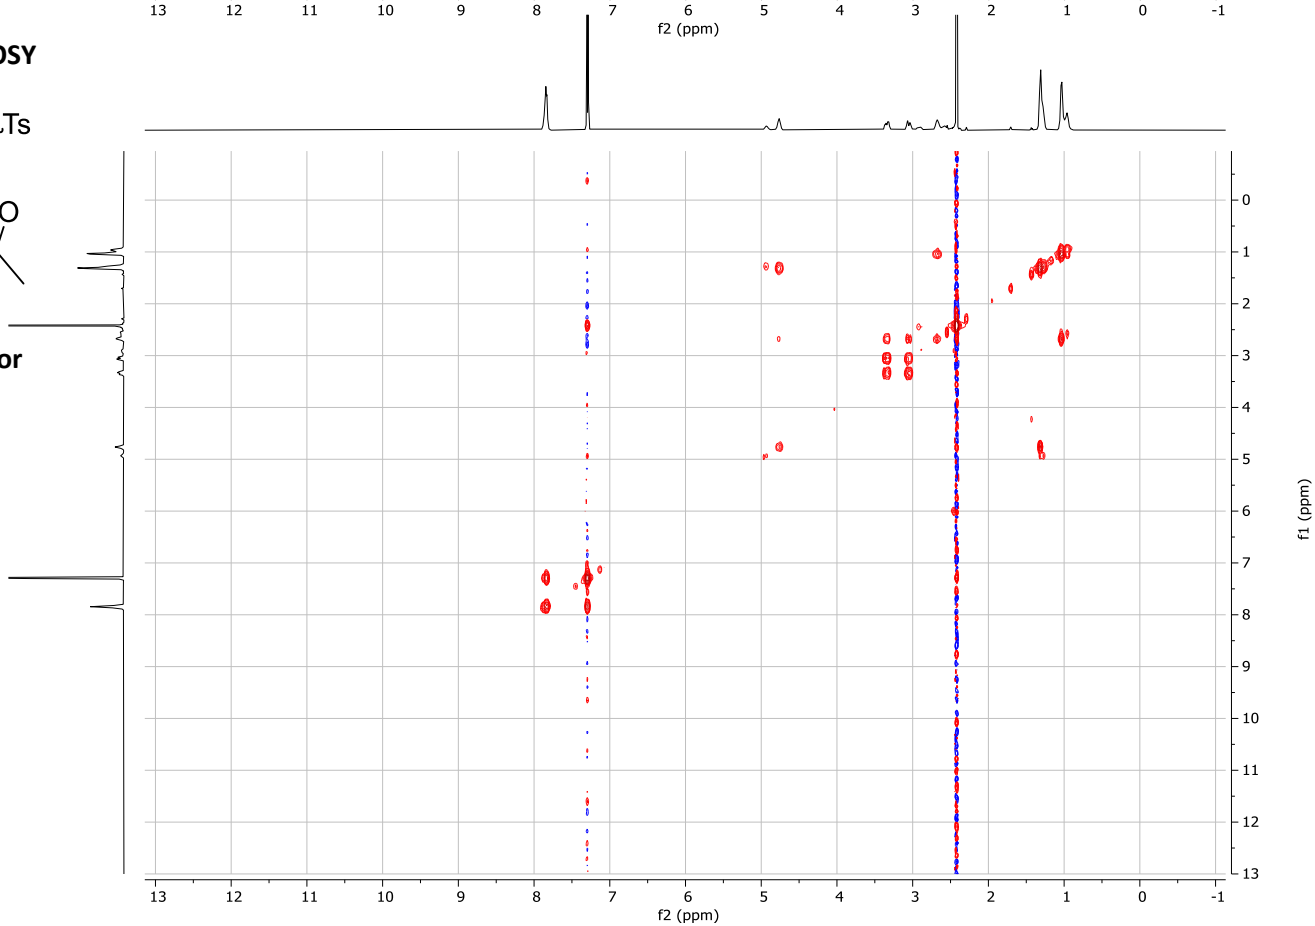

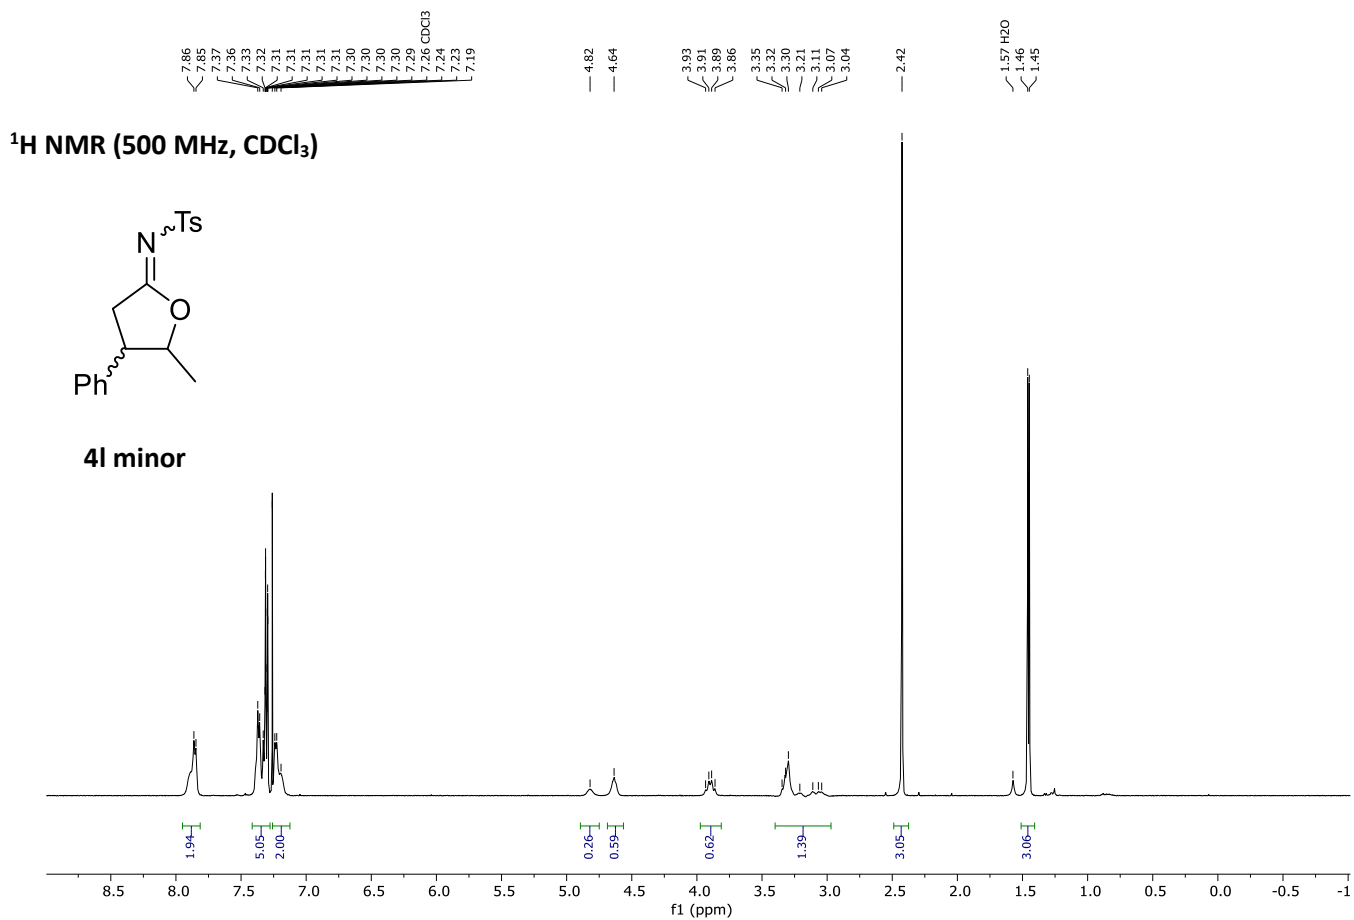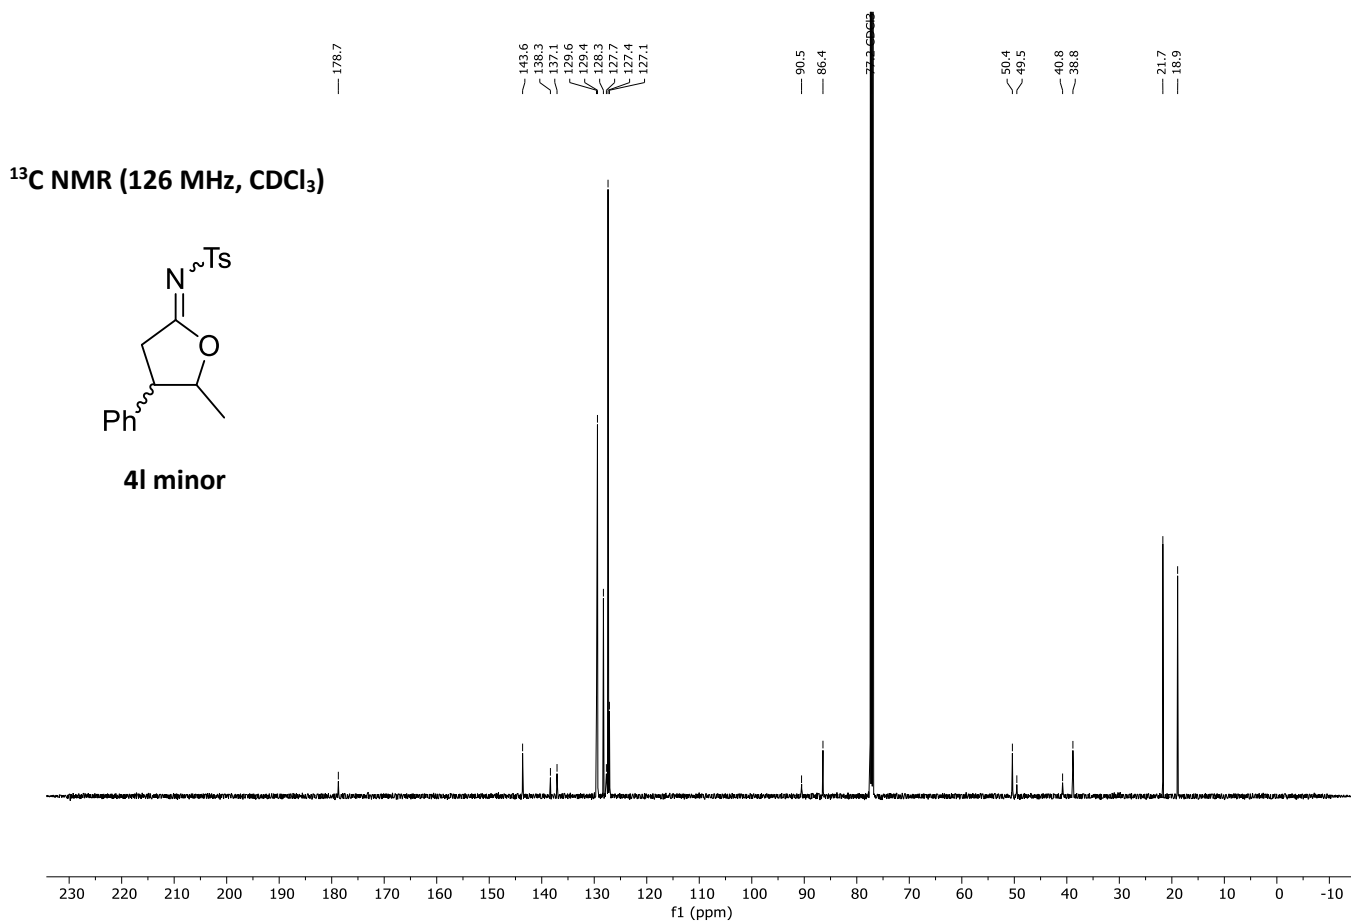

$^1\text{H}$ - $^{13}\text{C}$  HSQC

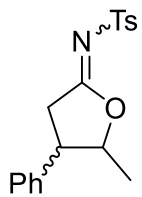

4l minor

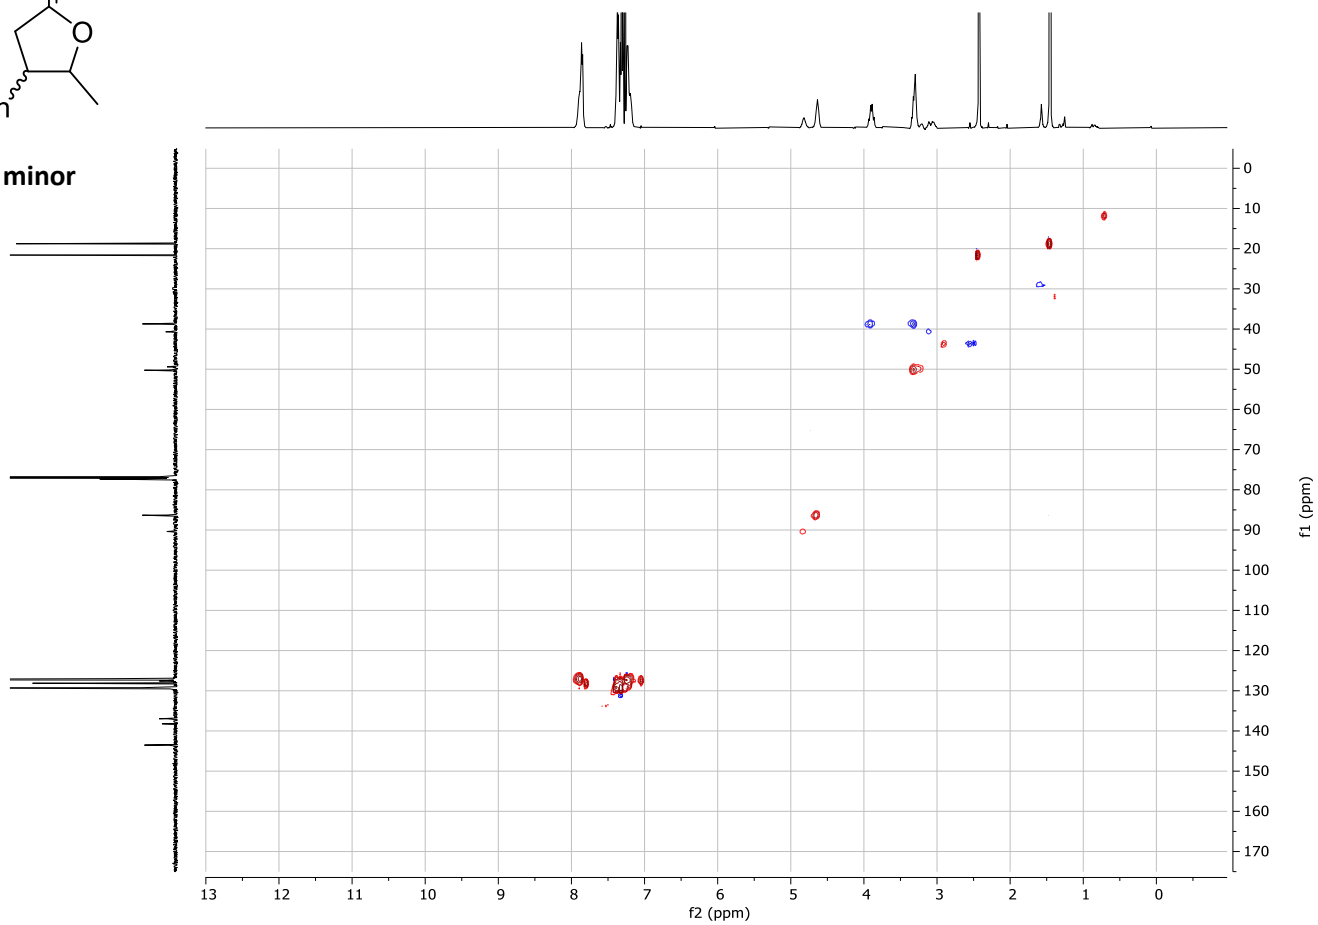

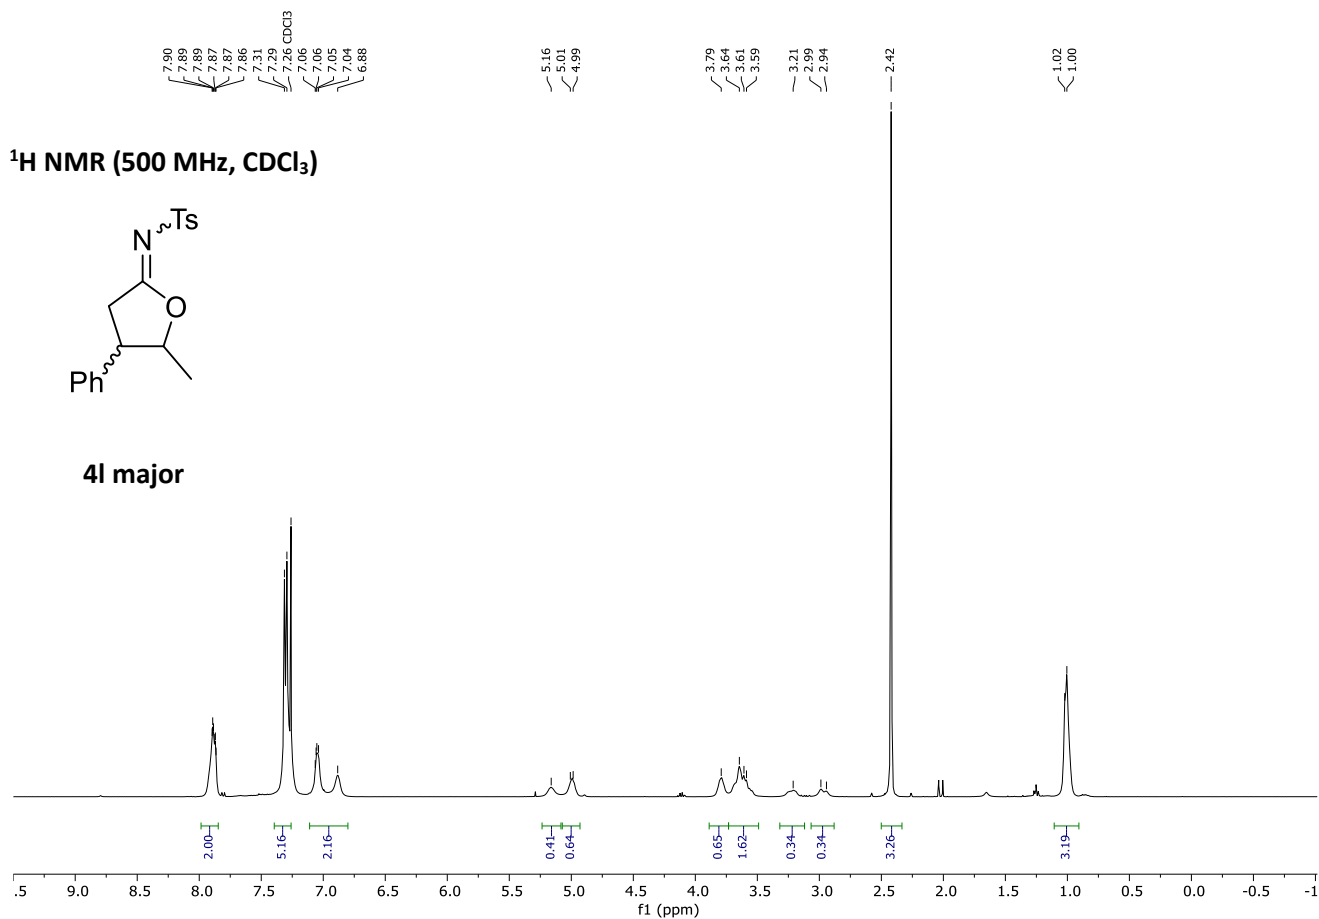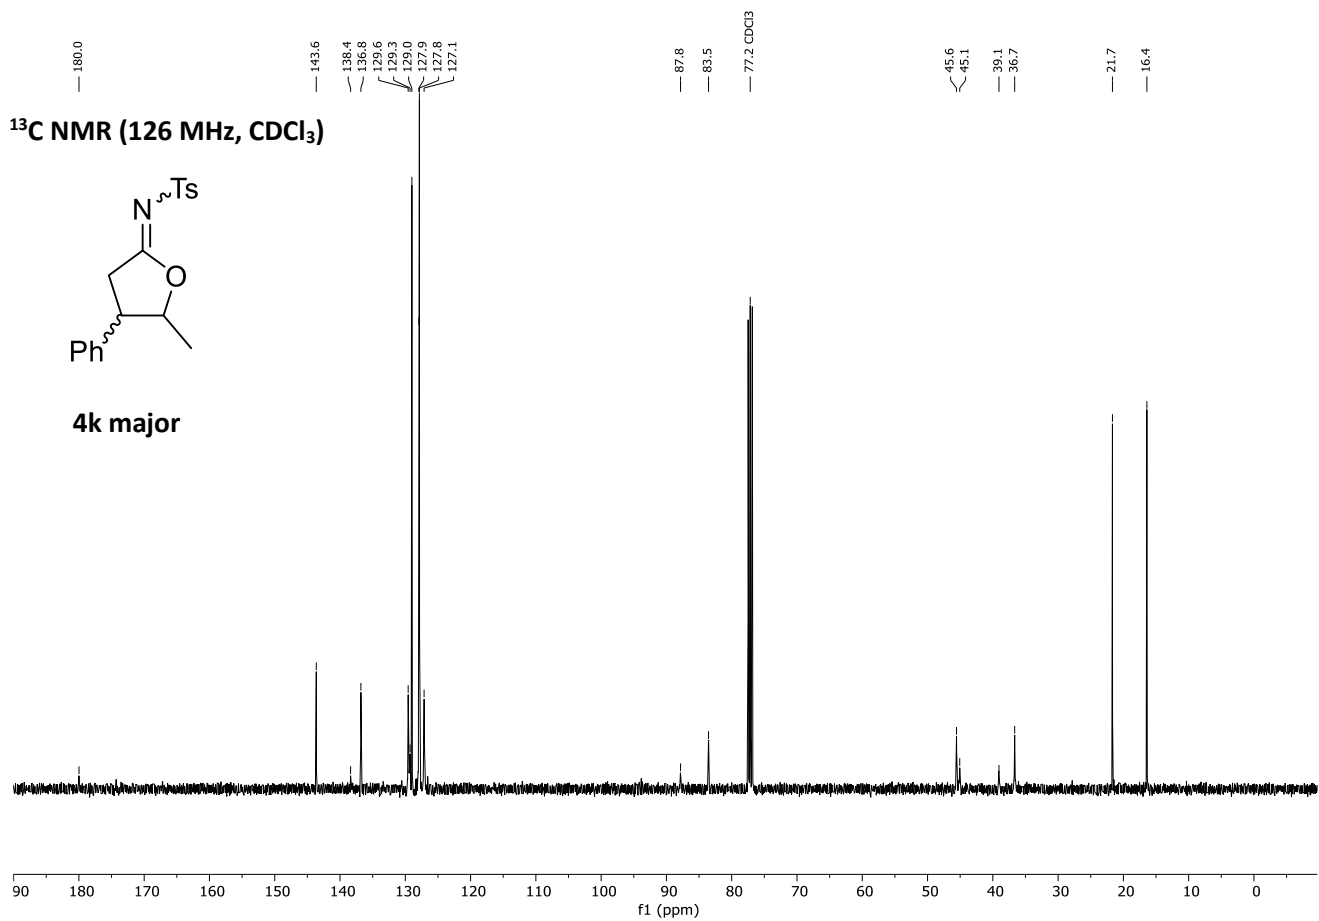

$^1\text{H}$ - $^{13}\text{C}$  HSQC

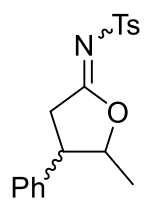

4l major

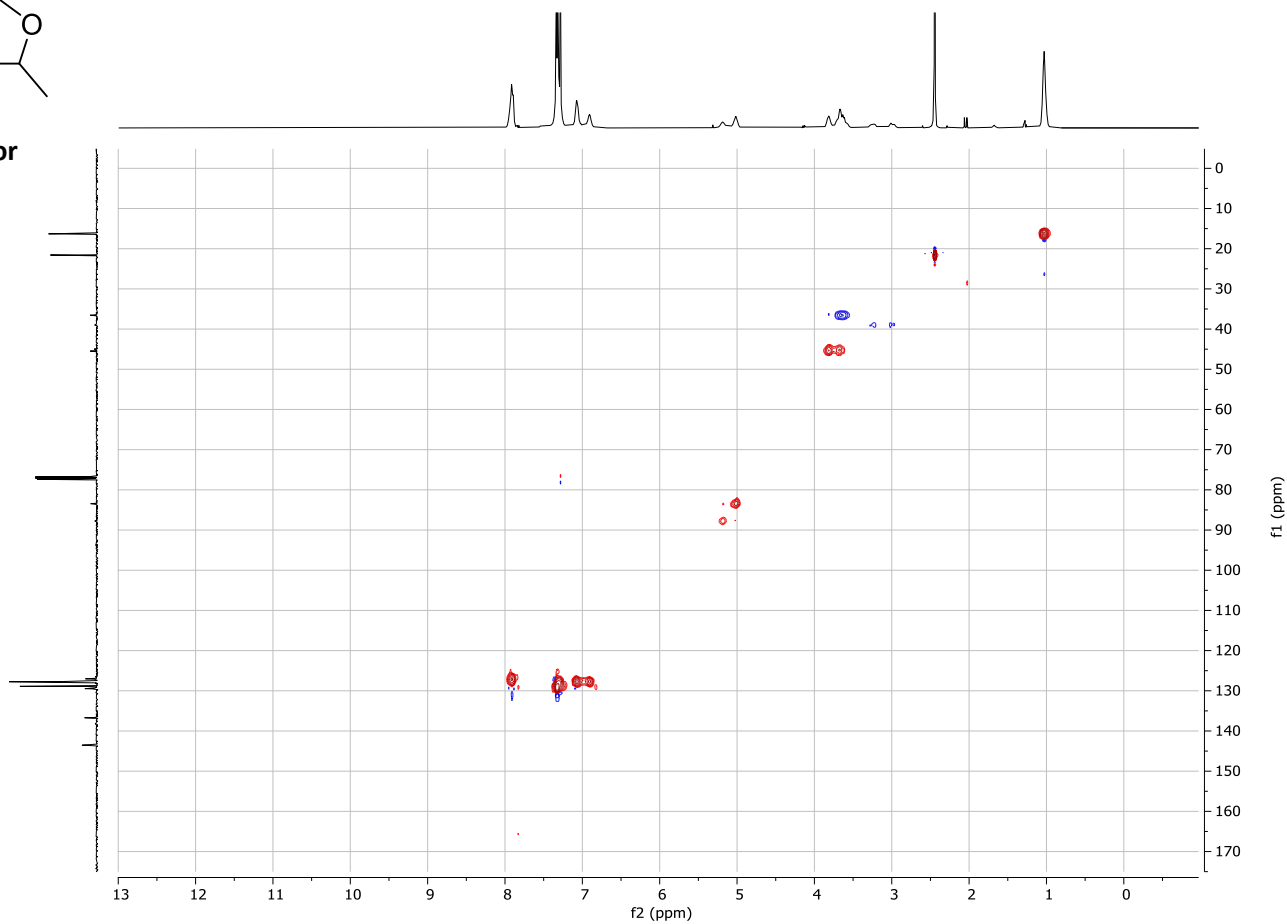

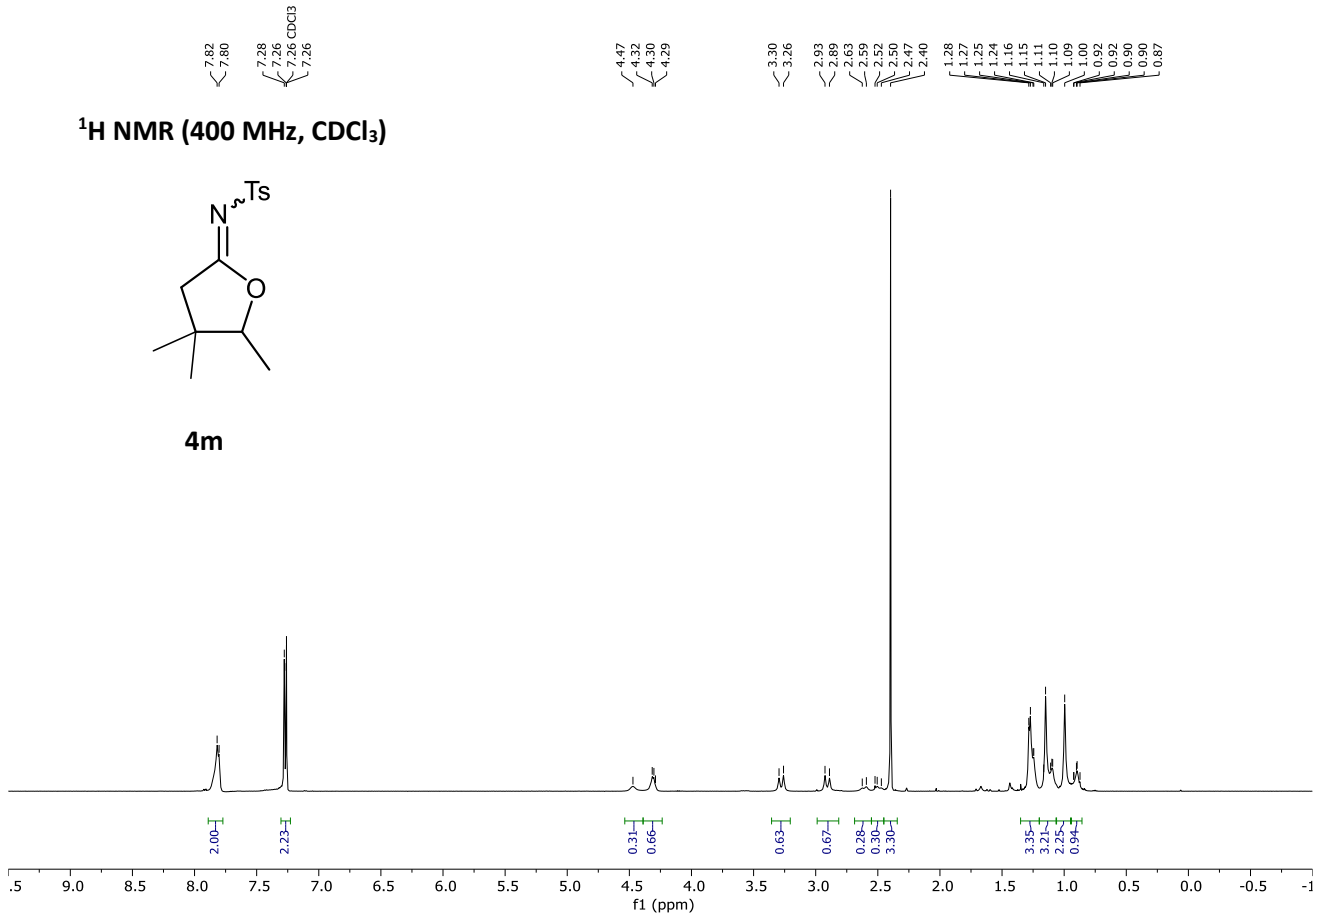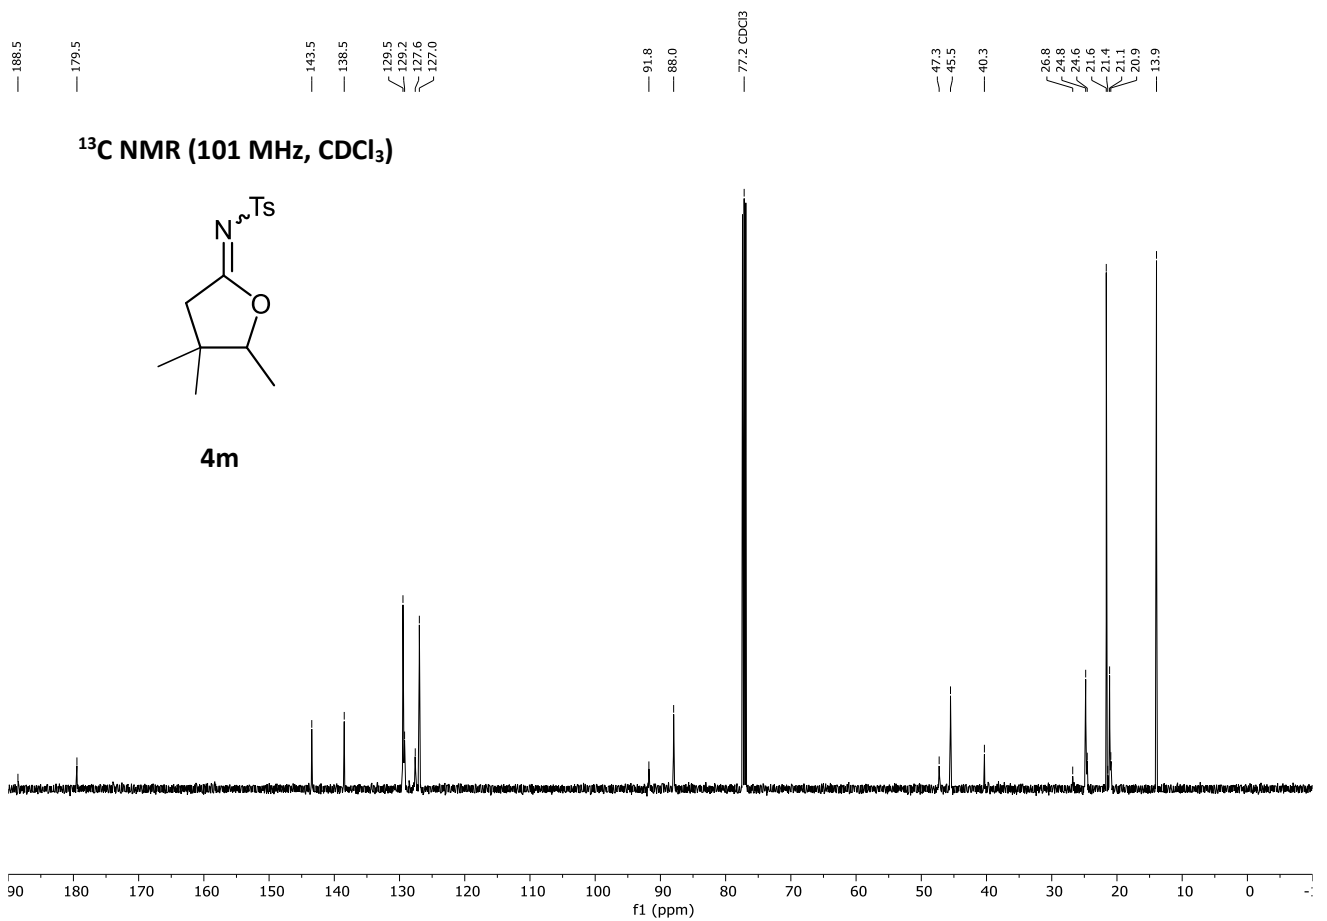



**<sup>1</sup>H NMR (400 MHz, CDCl<sub>3</sub>)**

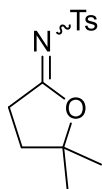

**4n**

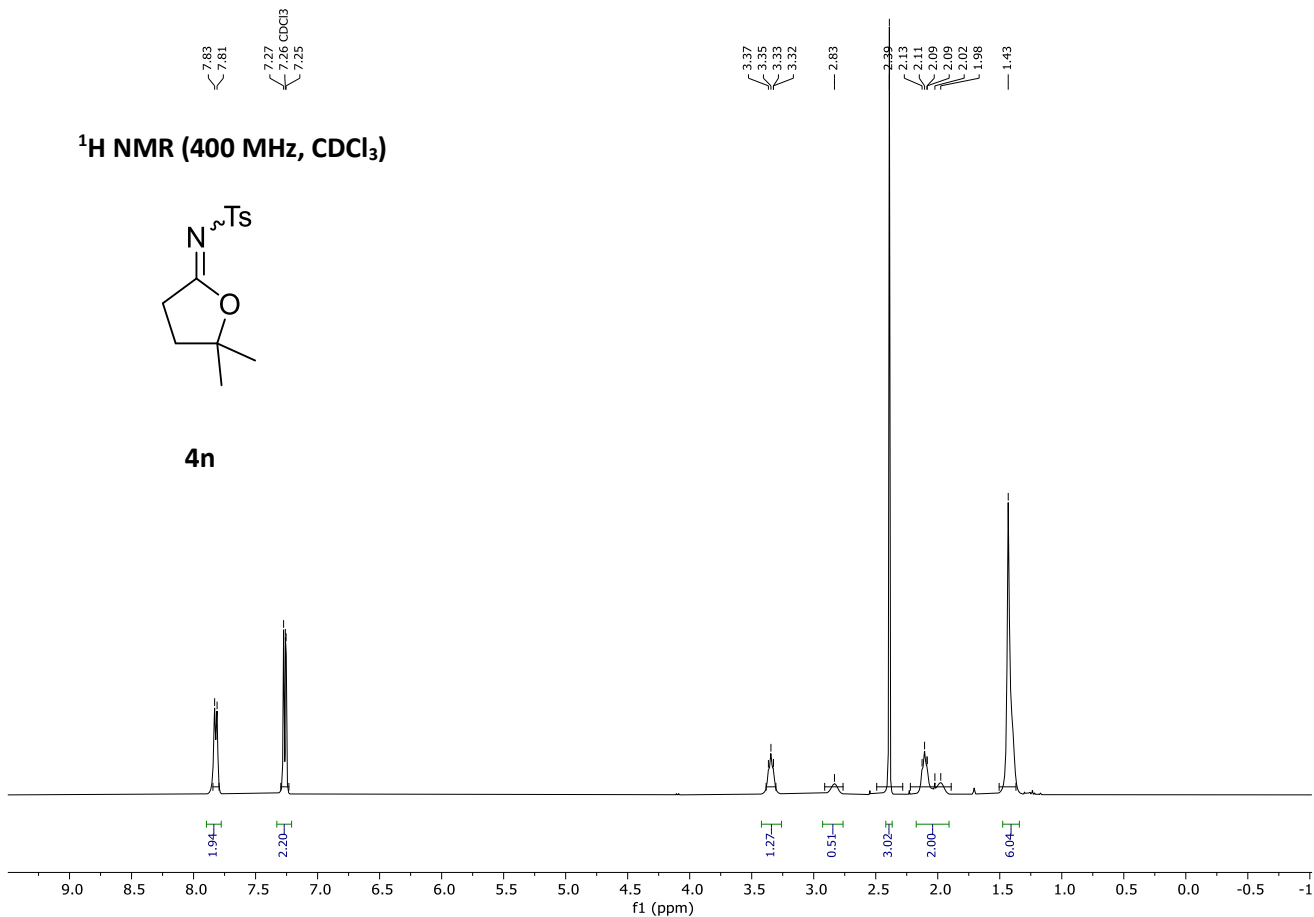

**<sup>13</sup>C NMR (101 MHz, CDCl<sub>3</sub>)**

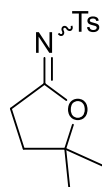

**4n**

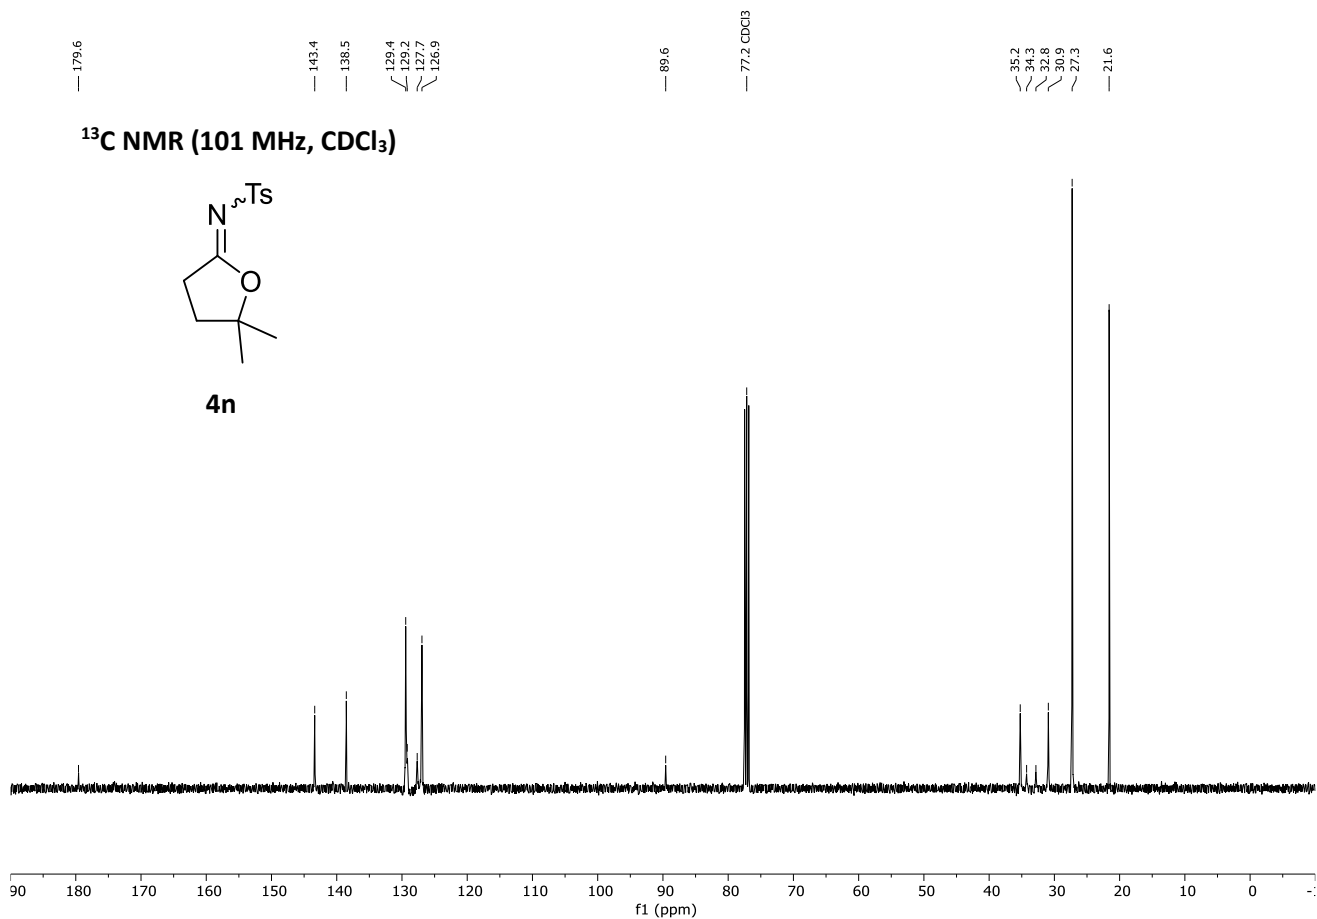

$^1\text{H}$ - $^{13}\text{C}$  HSQC

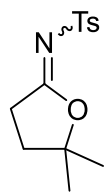

4n

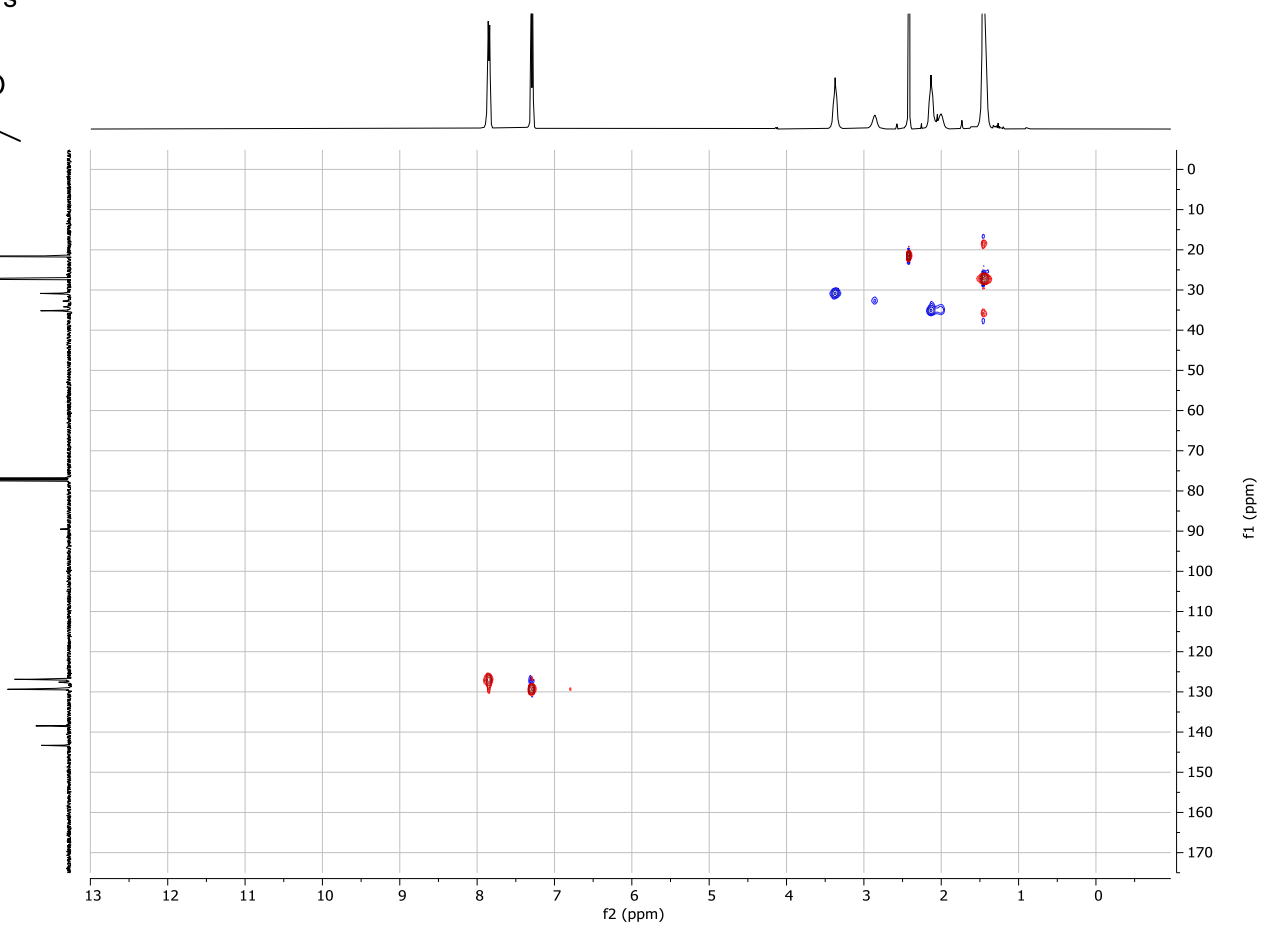

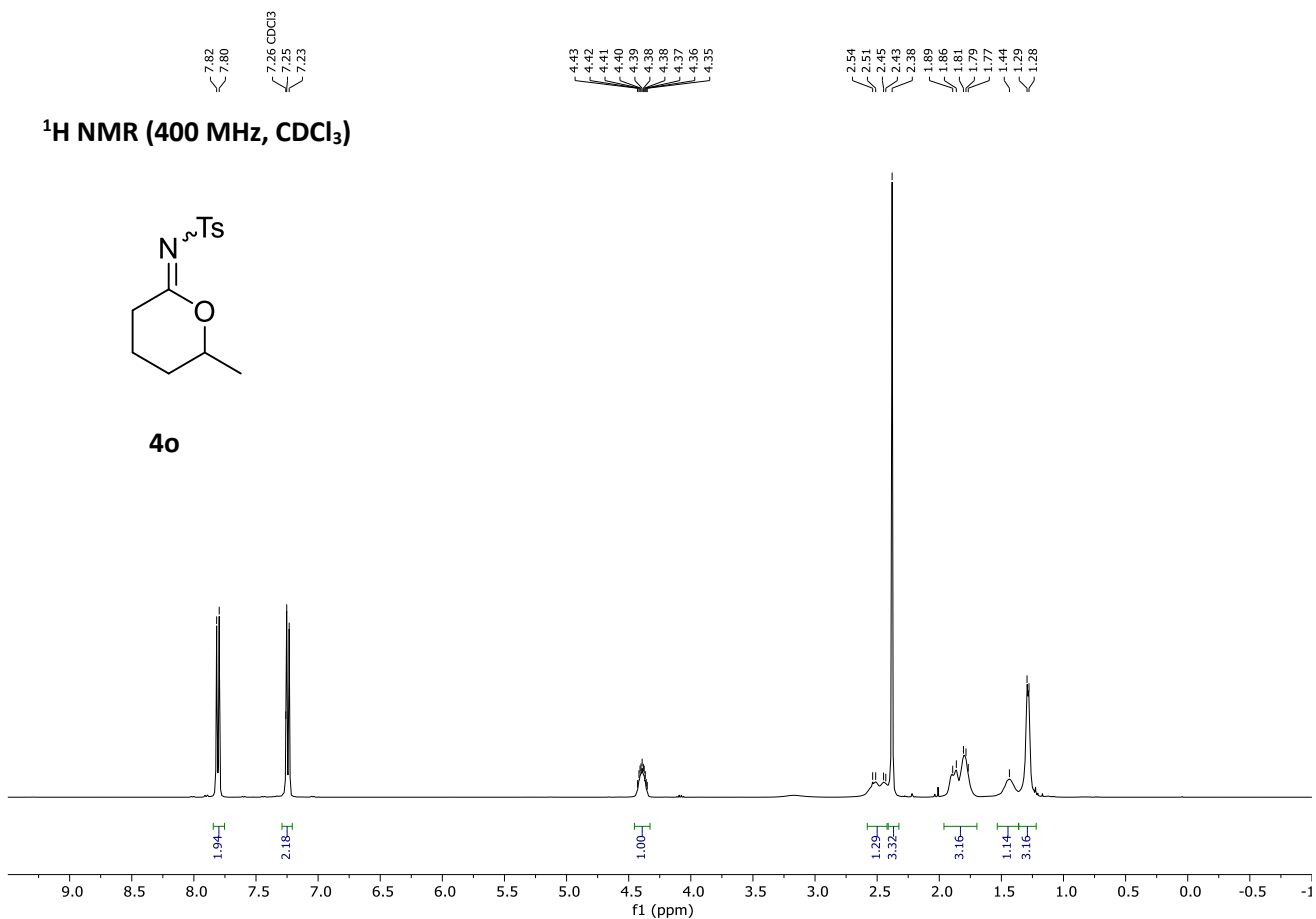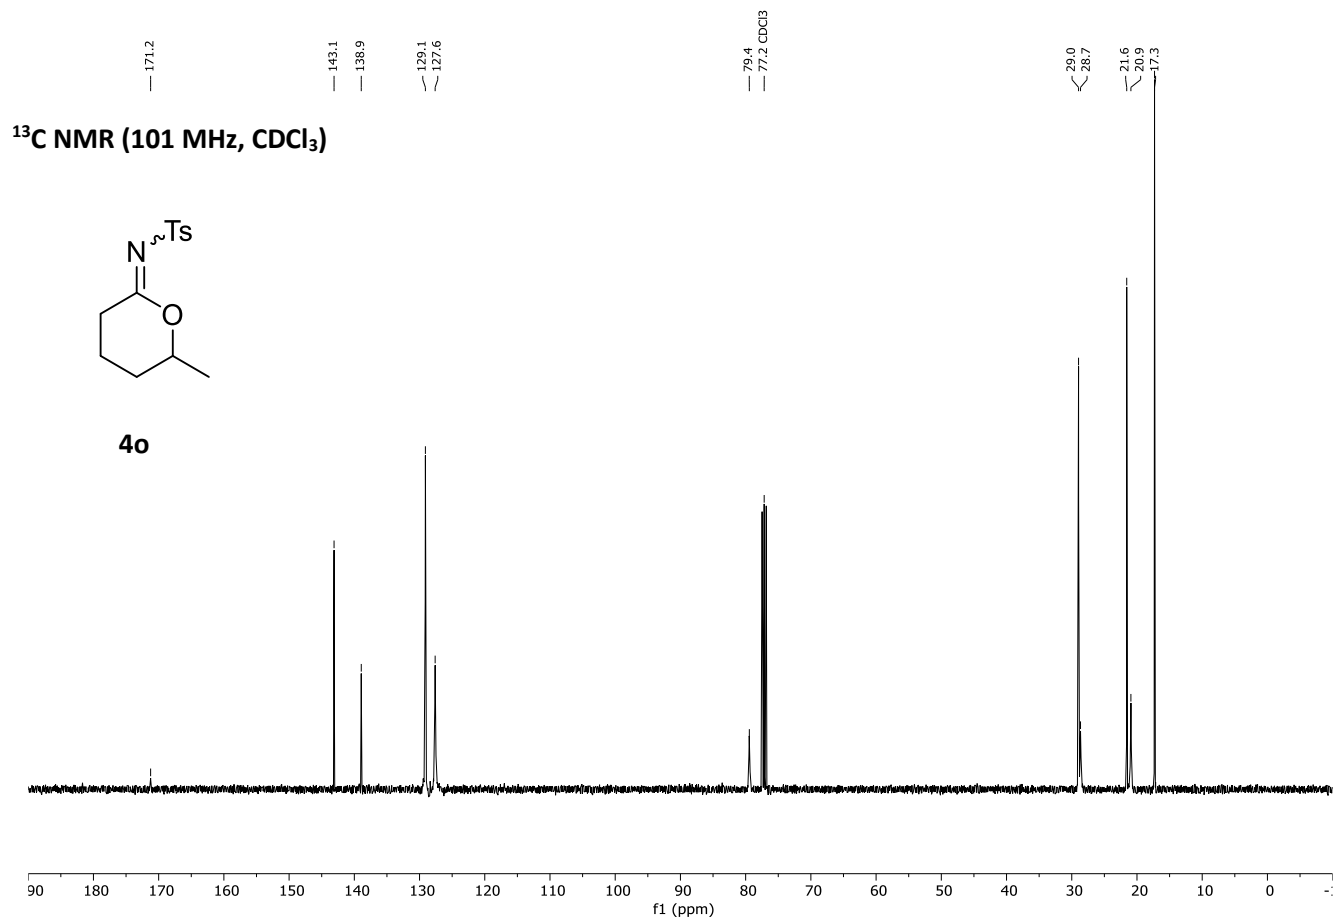

$^1\text{H}$ - $^{13}\text{C}$  HSQC

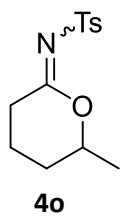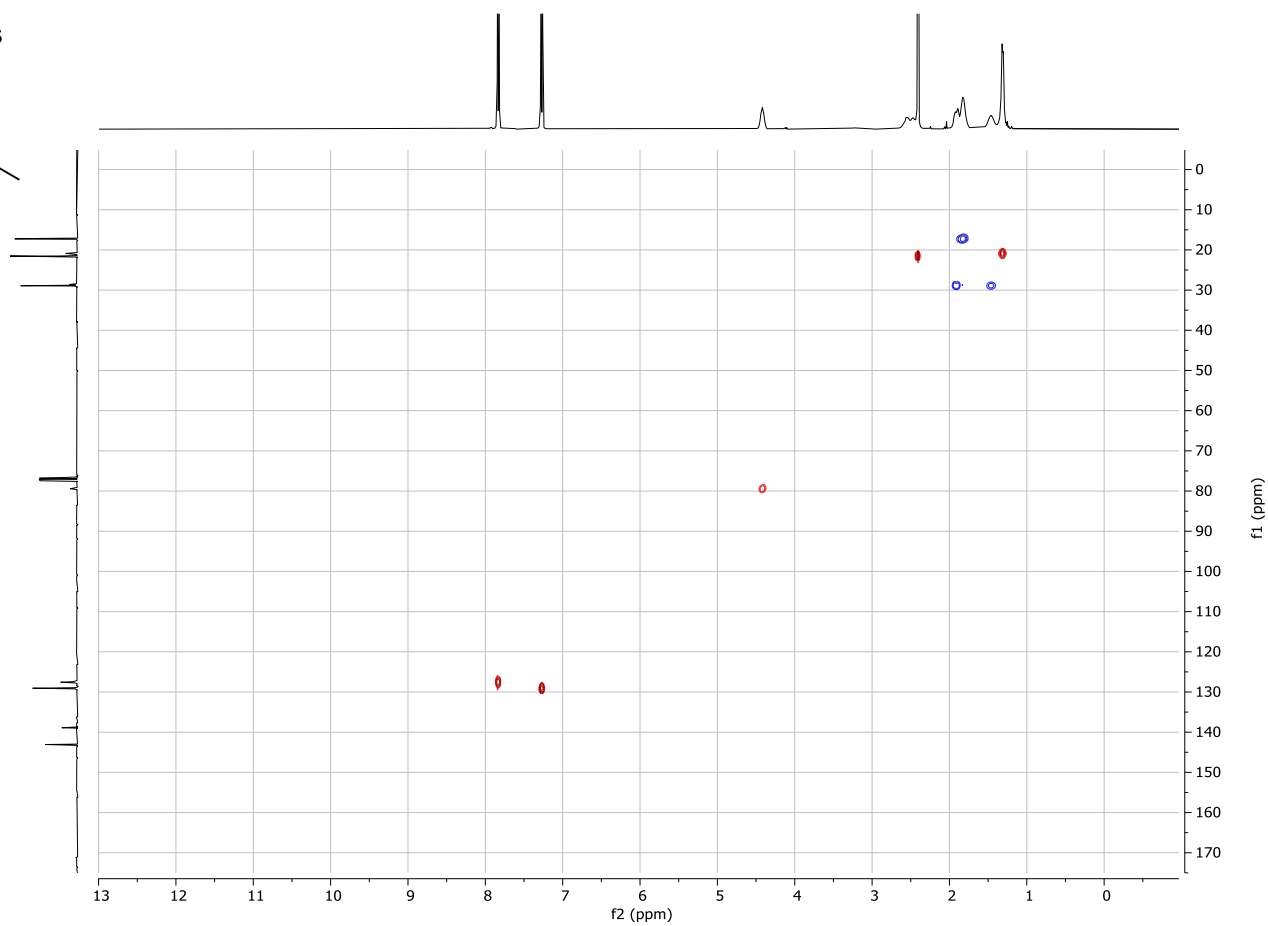

8.14  
8.14  
8.12  
8.12  
7.93  
7.91  
7.52  
7.52  
7.50  
7.50  
7.49  
7.48  
7.34  
7.32  
7.32  
7.30  
7.27  
7.26 CDCl<sub>3</sub>  
7.18  
7.16  
7.16

4.64  
4.63  
4.63  
4.62  
4.61  
4.61  
4.61  
4.60  
4.60  
4.59  
4.59  
4.59  
4.58  
4.57  
4.56

2.94  
2.92  
2.91  
2.90  
2.89  
2.84  
2.42

1.46  
1.45

**<sup>1</sup>H NMR (400 MHz, CDCl<sub>3</sub>)**

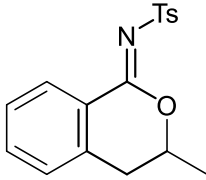

**4p**

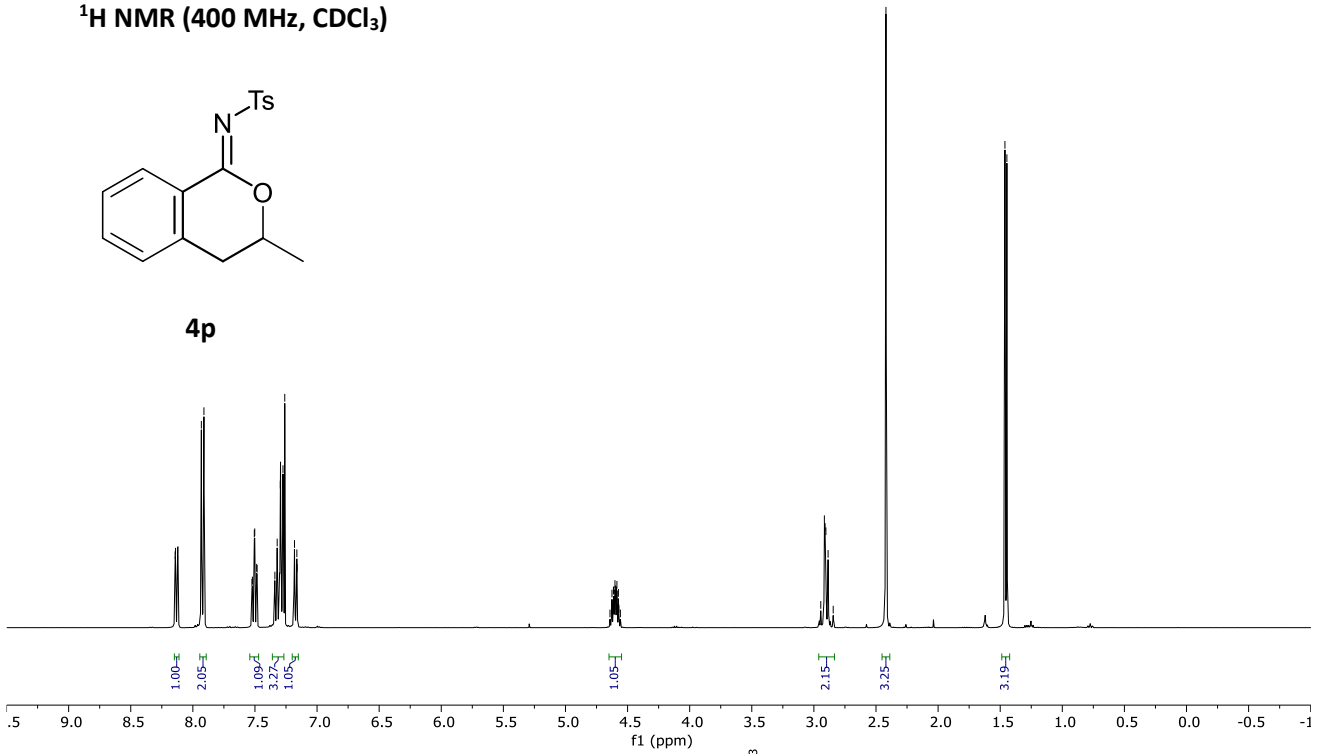

163.2  
143.1  
139.3  
137.8  
134.3  
130.2  
129.1  
127.9  
127.8  
127.8  
125.0

77.2  
77.2 CDCl<sub>3</sub>

34.3

21.7  
20.2

**<sup>13</sup>C NMR (101 MHz, CDCl<sub>3</sub>)**

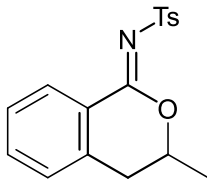

**4p**

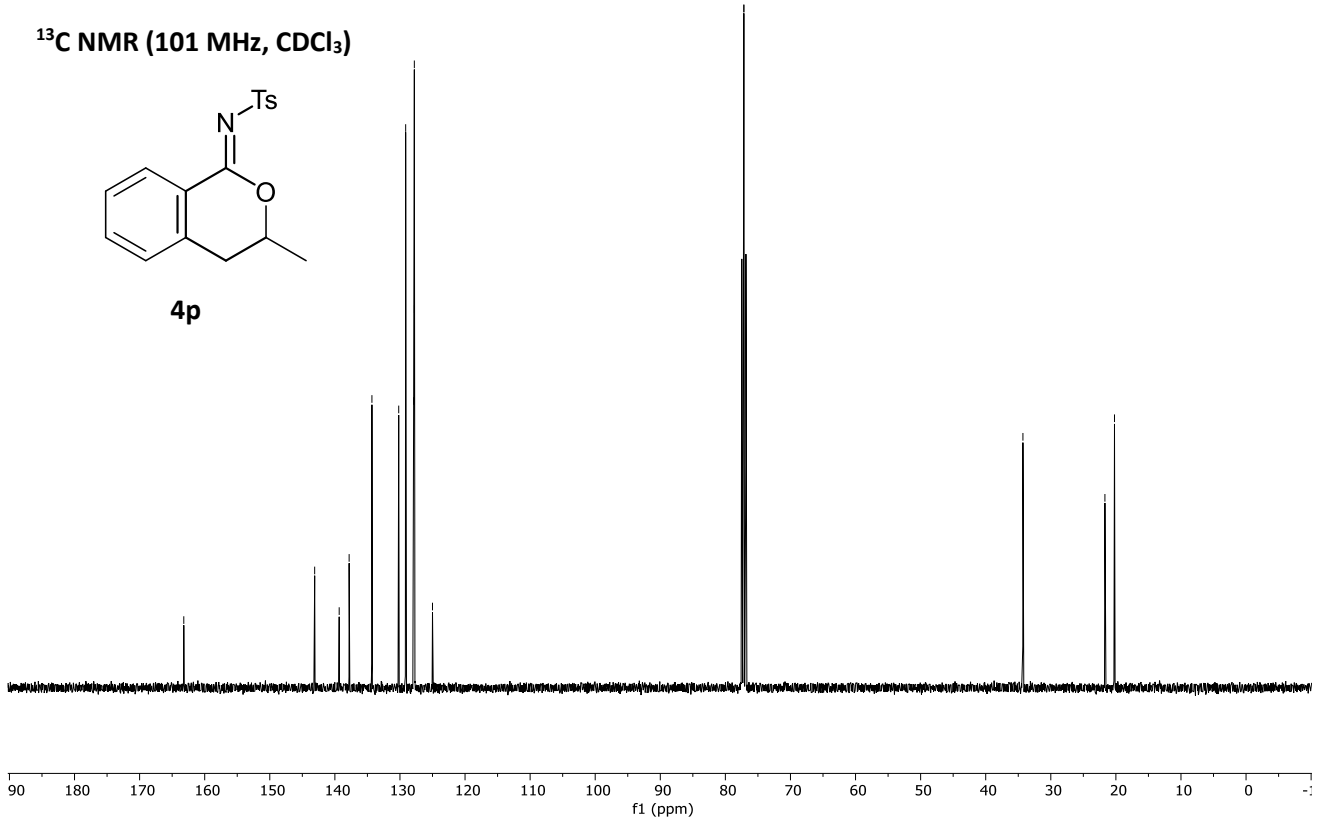

<sup>1</sup>H-<sup>13</sup>C HSQC

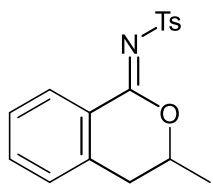

4o

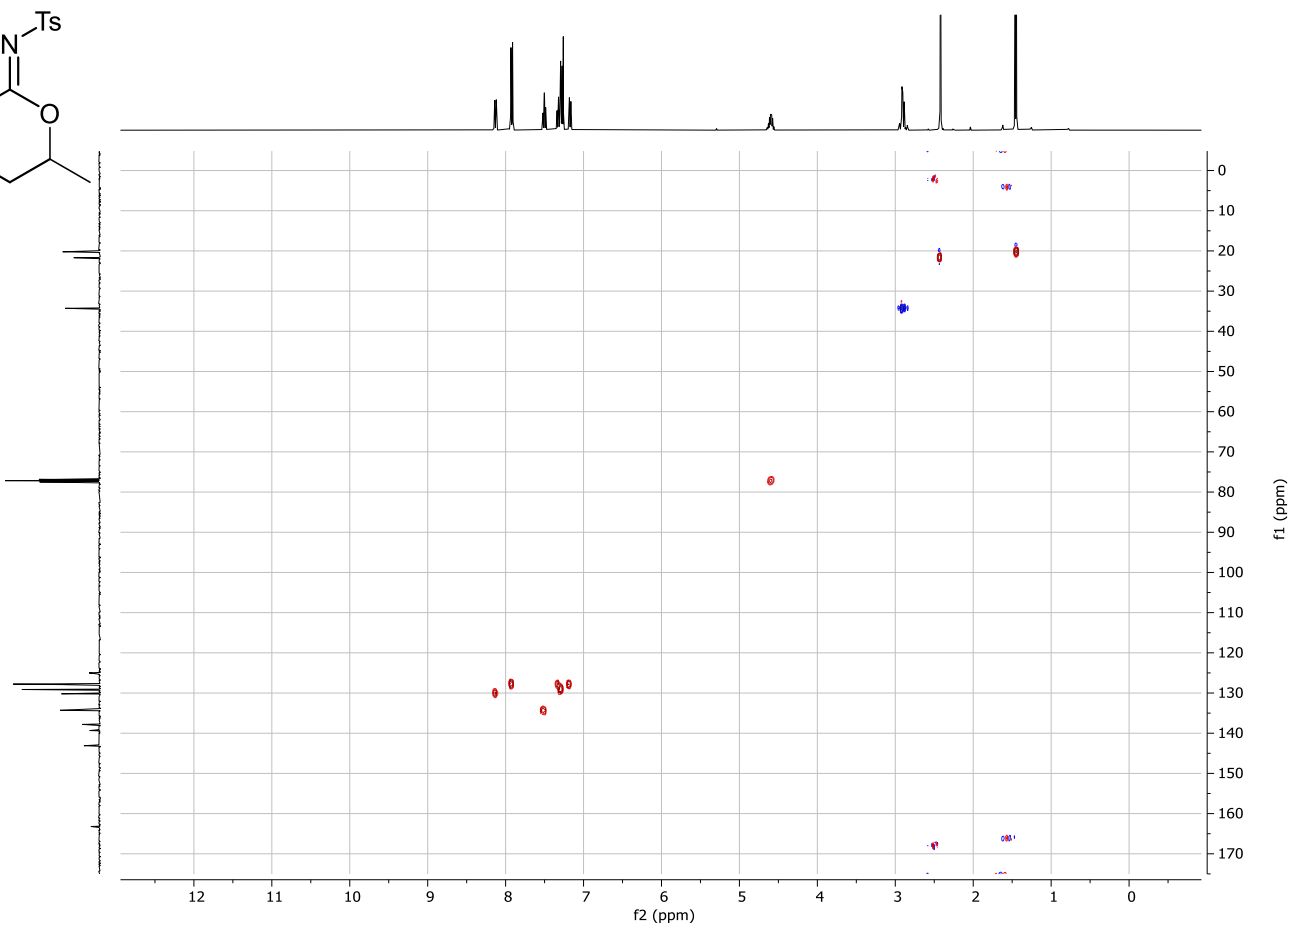

<sup>1</sup>H NMR (400 MHz, CDCl<sub>3</sub>)

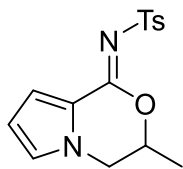

4q

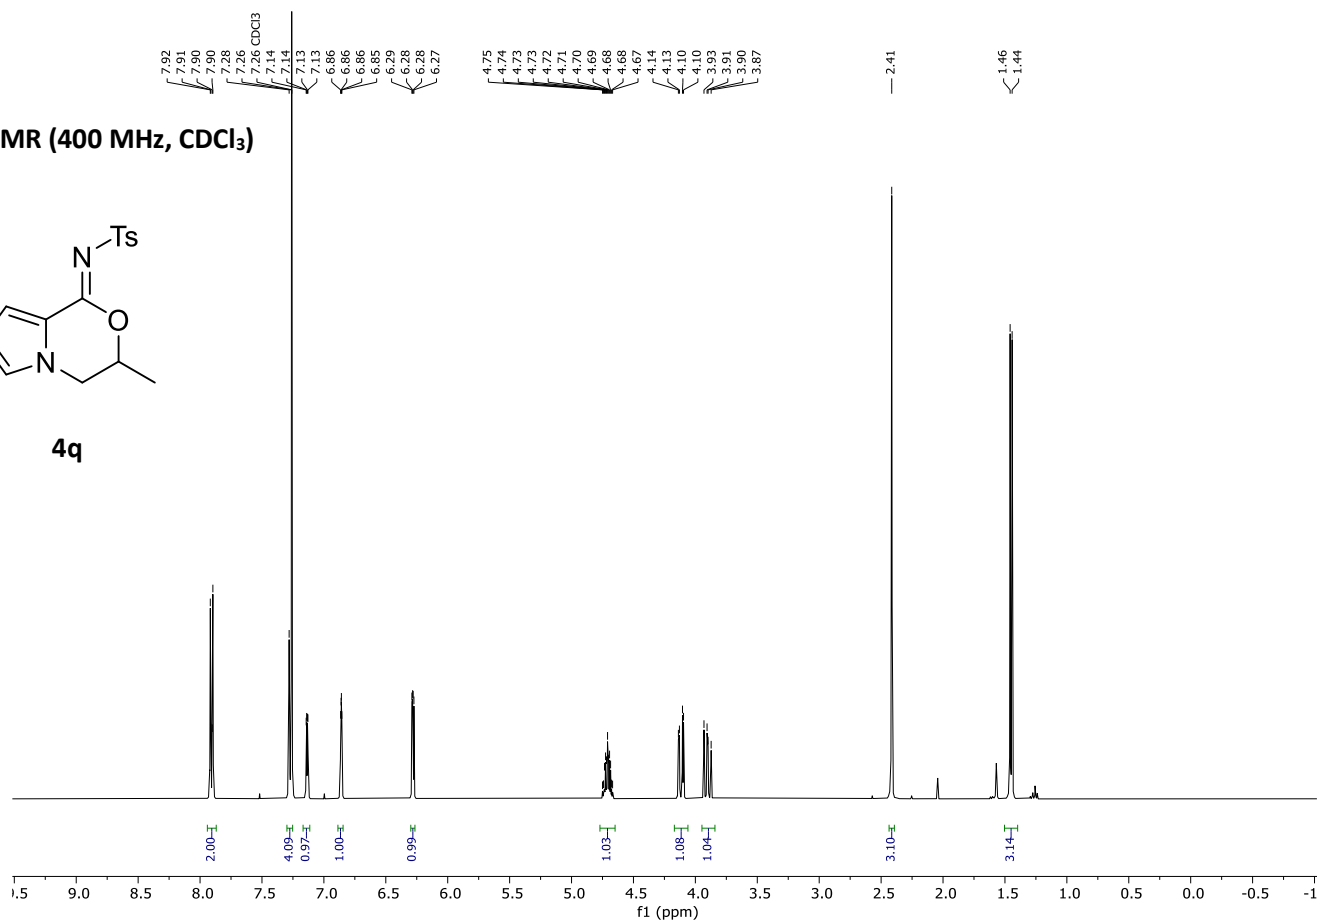

<sup>13</sup>C NMR (101 MHz, CDCl<sub>3</sub>)

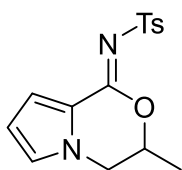

4q

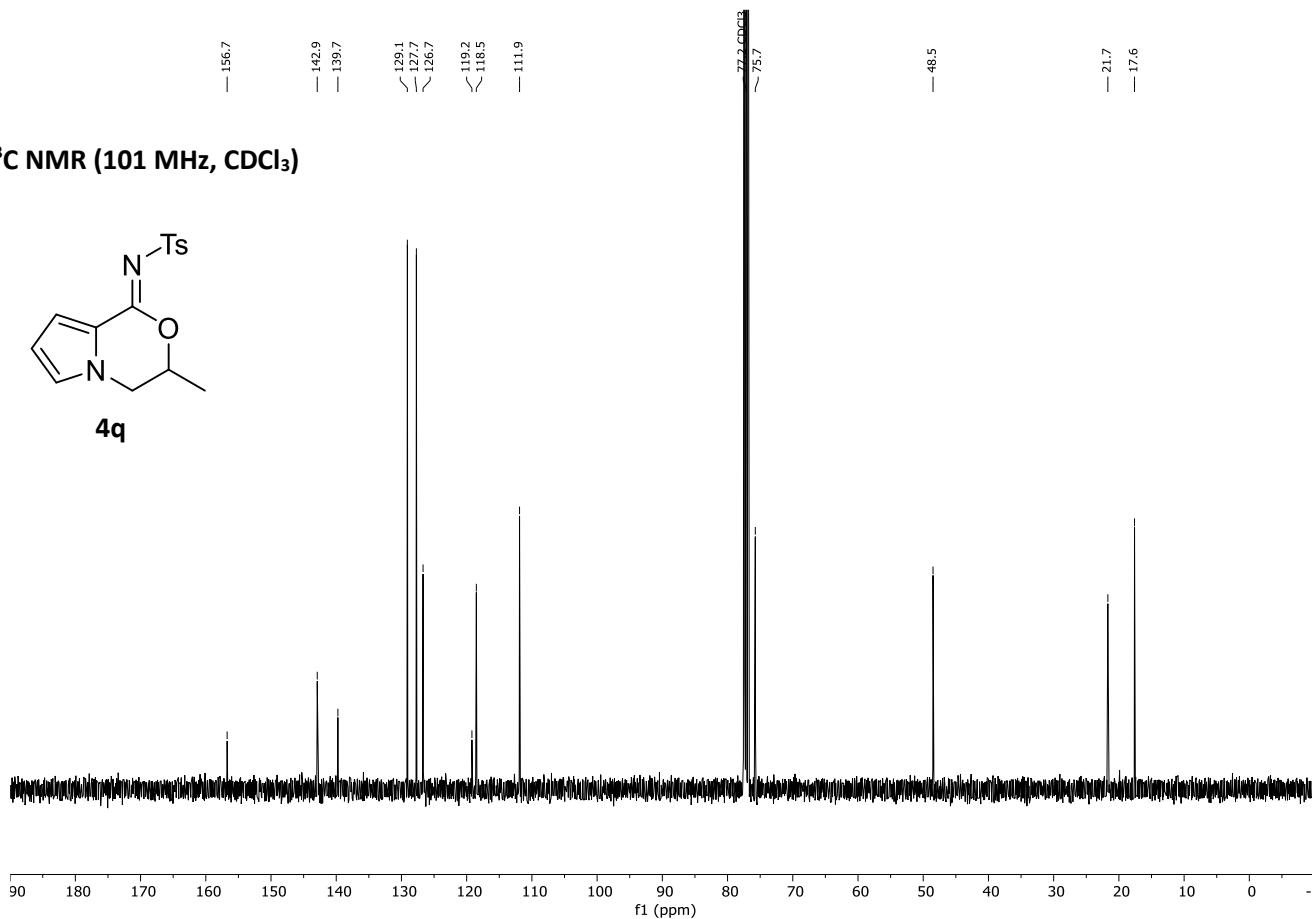

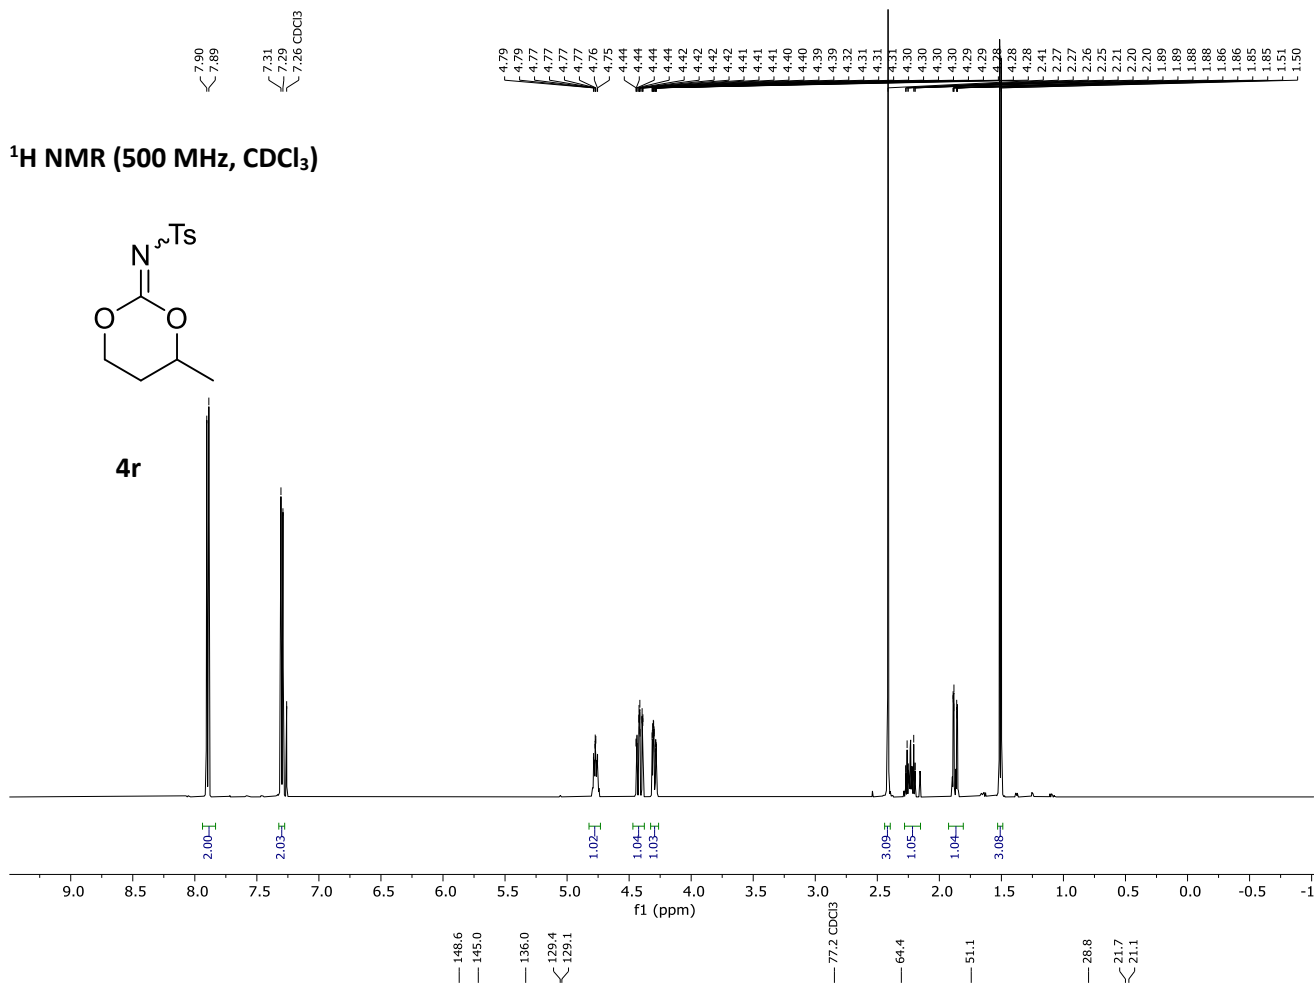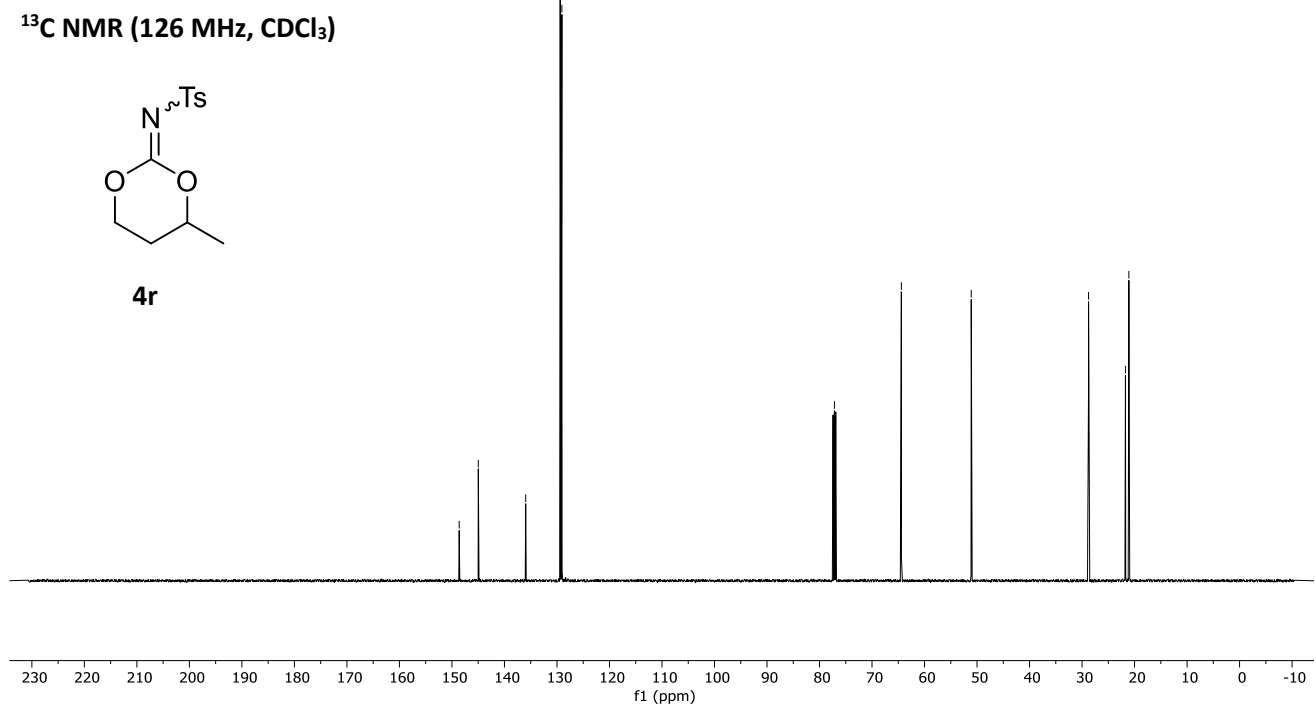



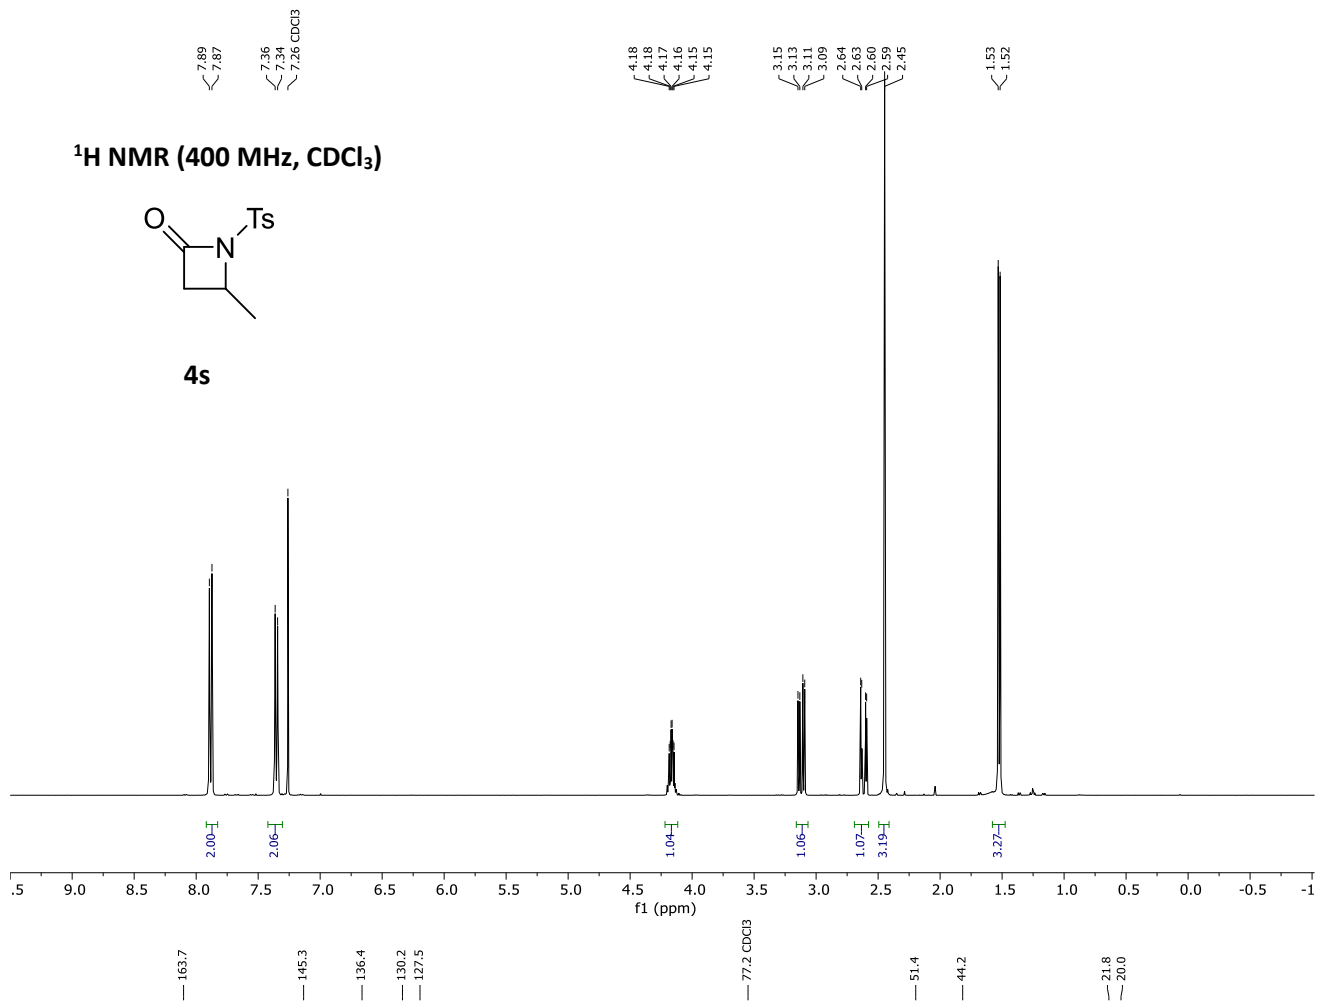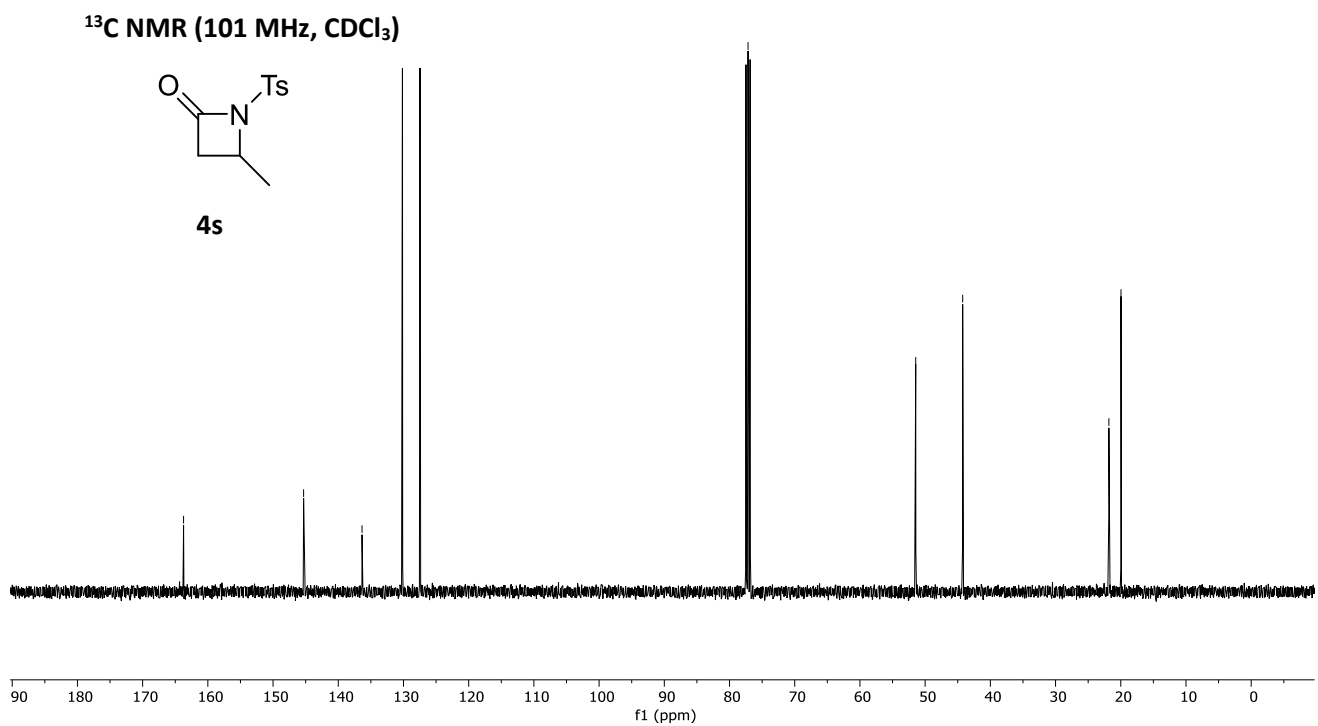

<sup>1</sup>H NMR (500 MHz, CDCl<sub>3</sub>)

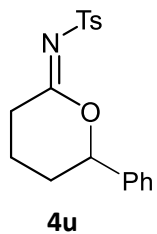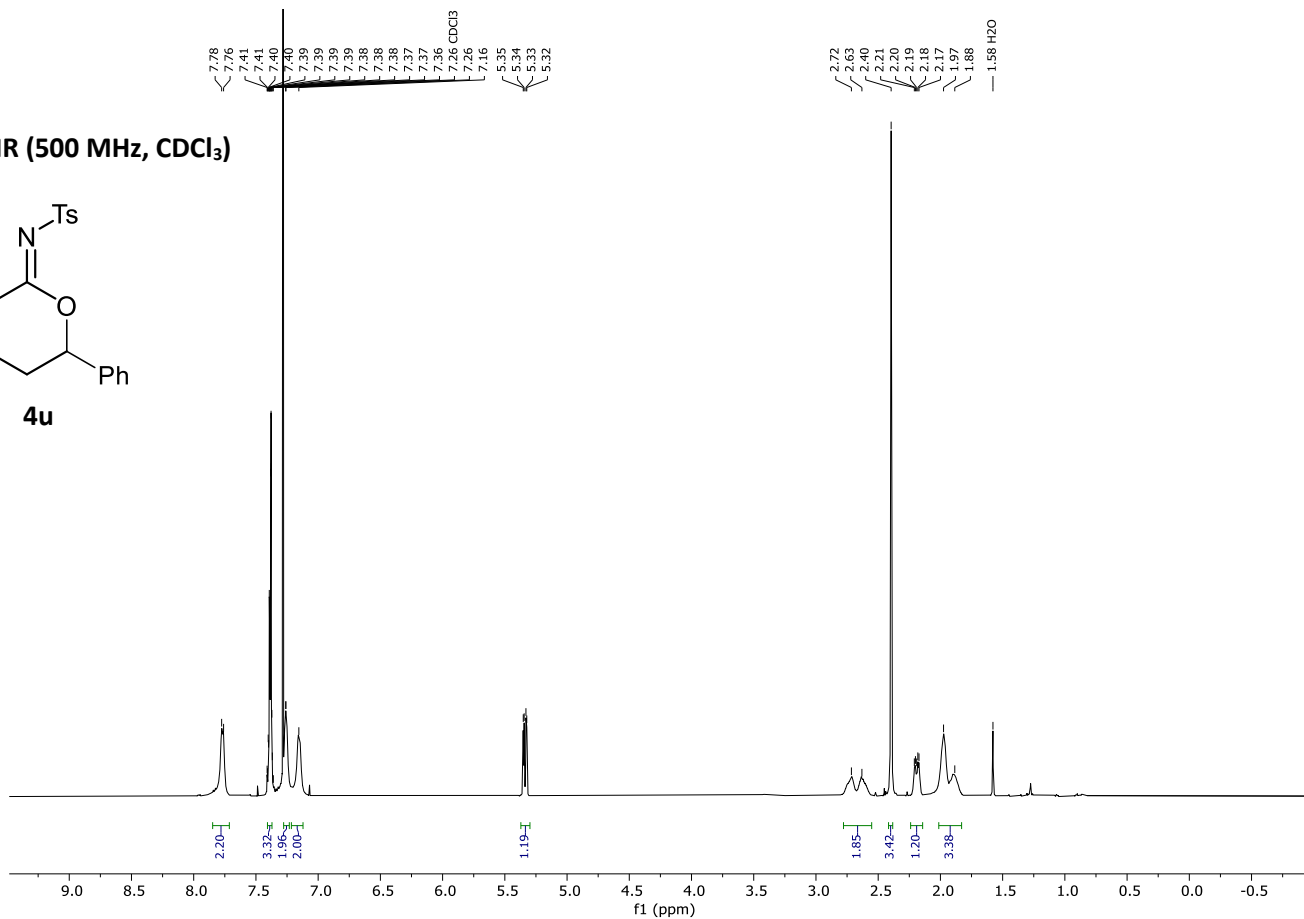

<sup>13</sup>C NMR (126 MHz, CDCl<sub>3</sub>)

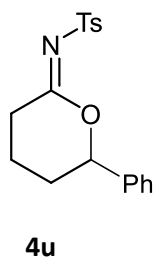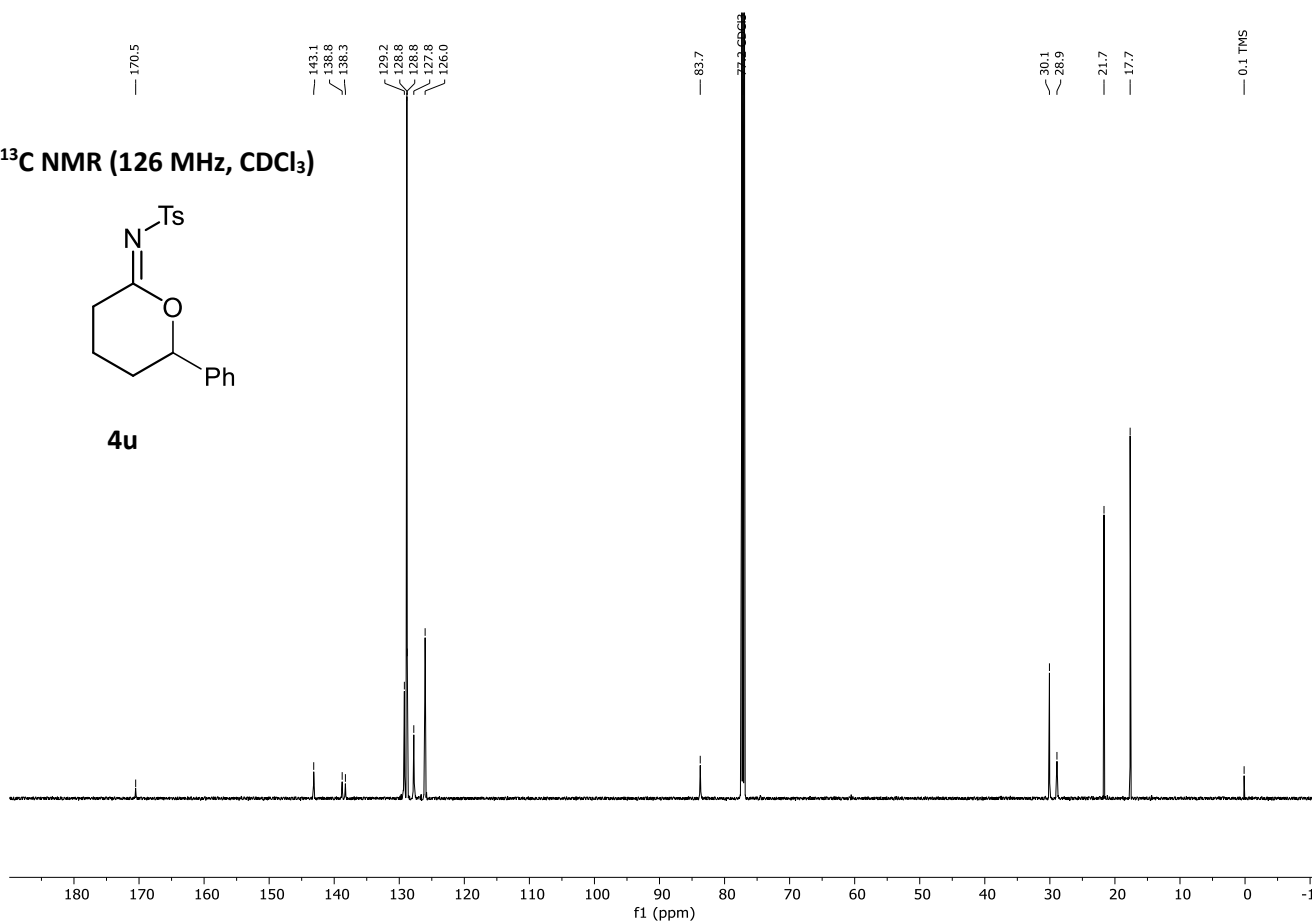

<sup>1</sup>H-<sup>1</sup>H DQF COSY

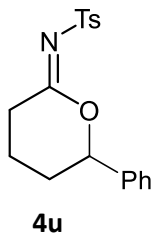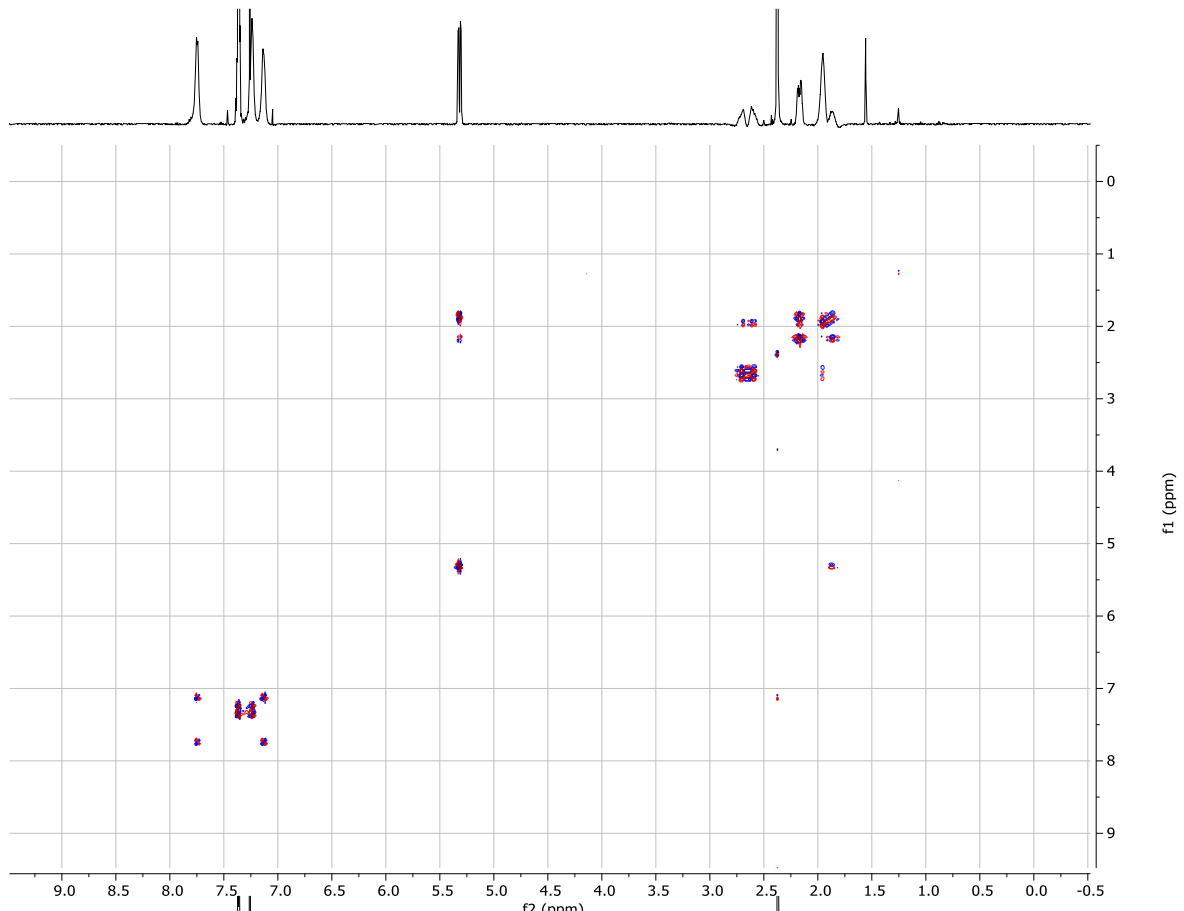

<sup>1</sup>H-<sup>13</sup>C HSQC

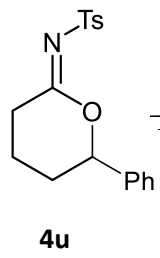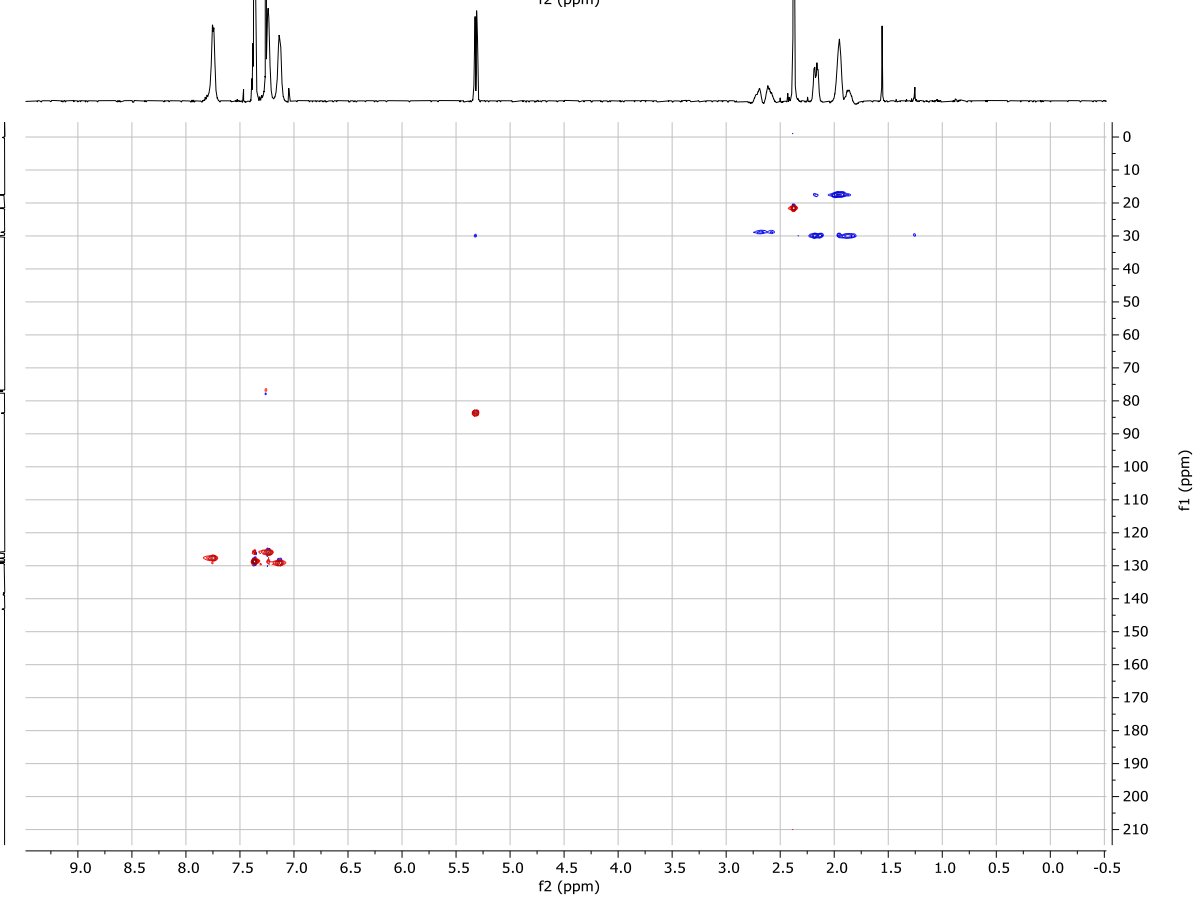

**<sup>1</sup>H NMR (500 MHz, CDCl<sub>3</sub>)**

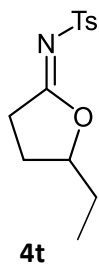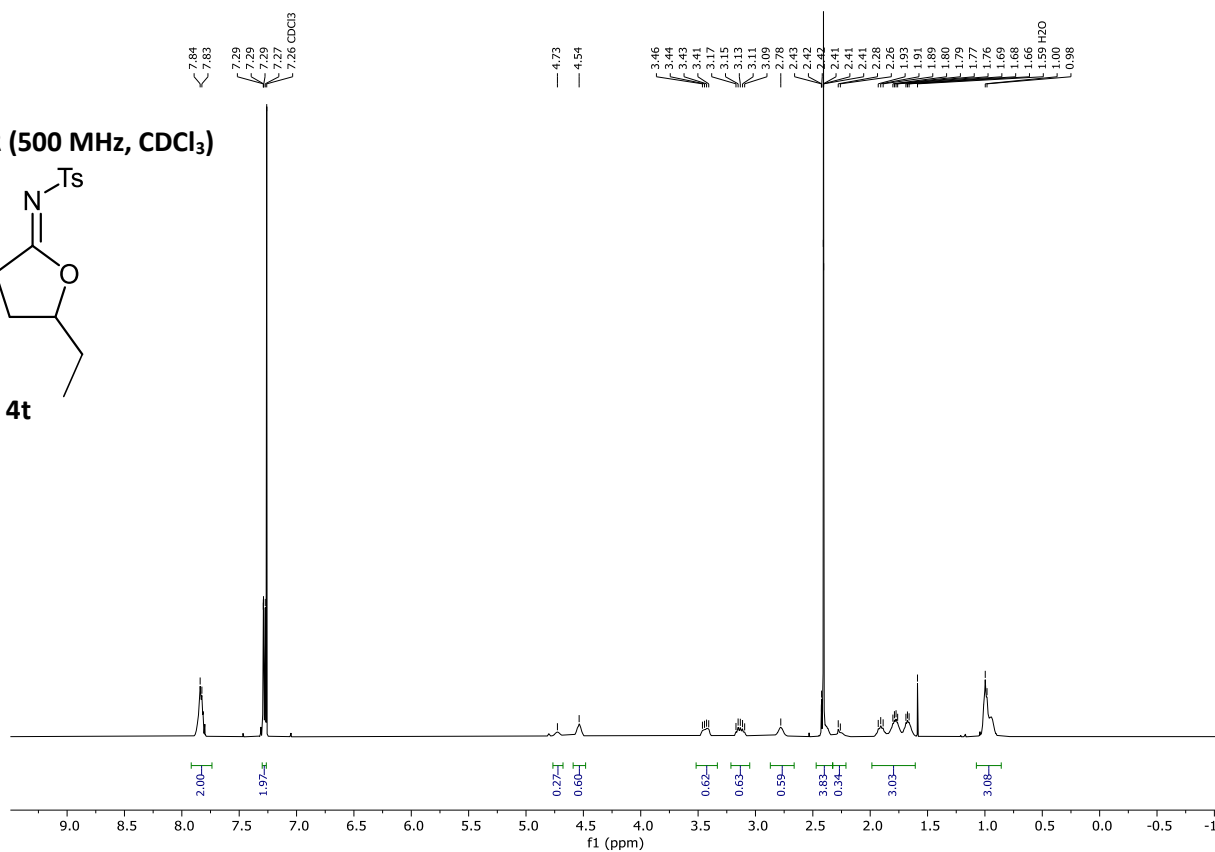

**<sup>13</sup>C NMR (126 MHz, CDCl<sub>3</sub>)**

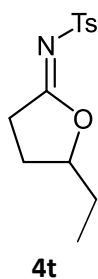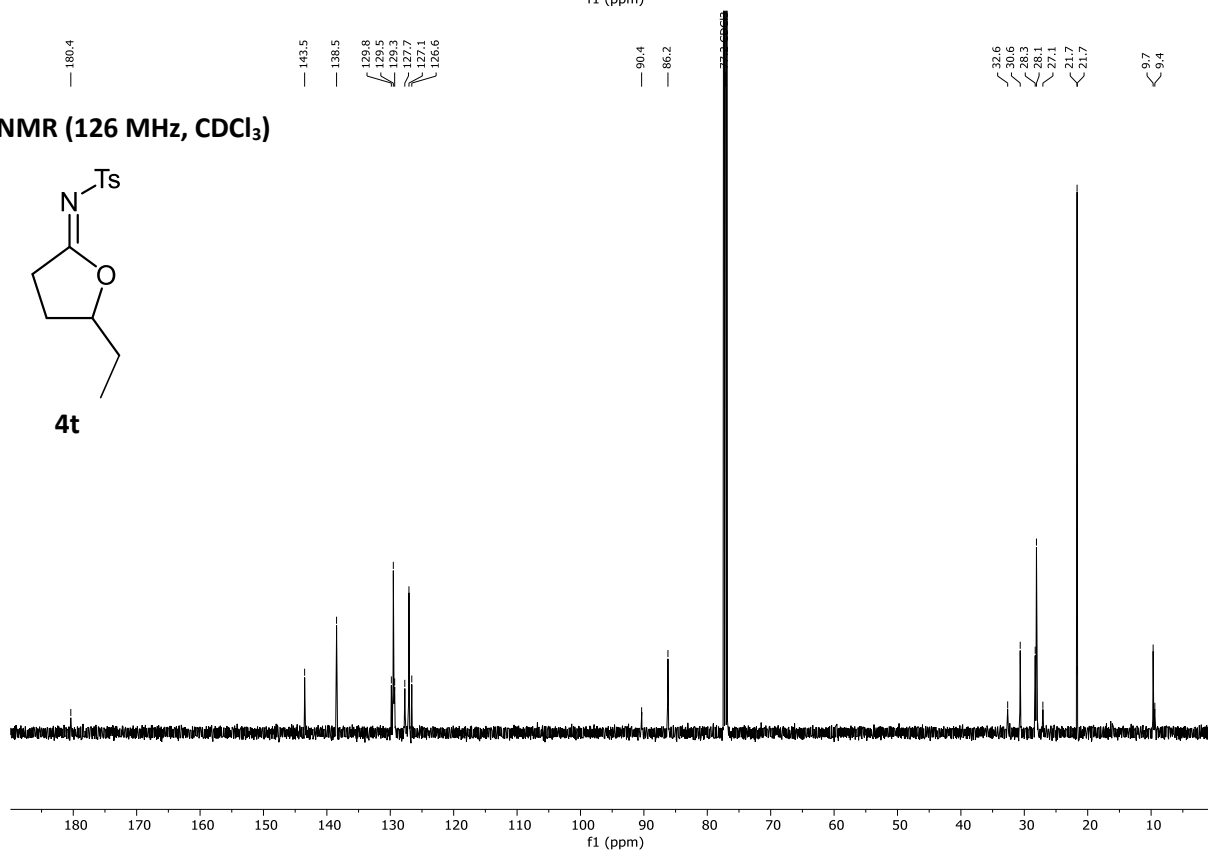

$^1\text{H}$ - $^1\text{H}$  COSY

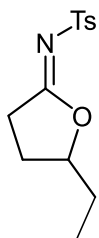

4t

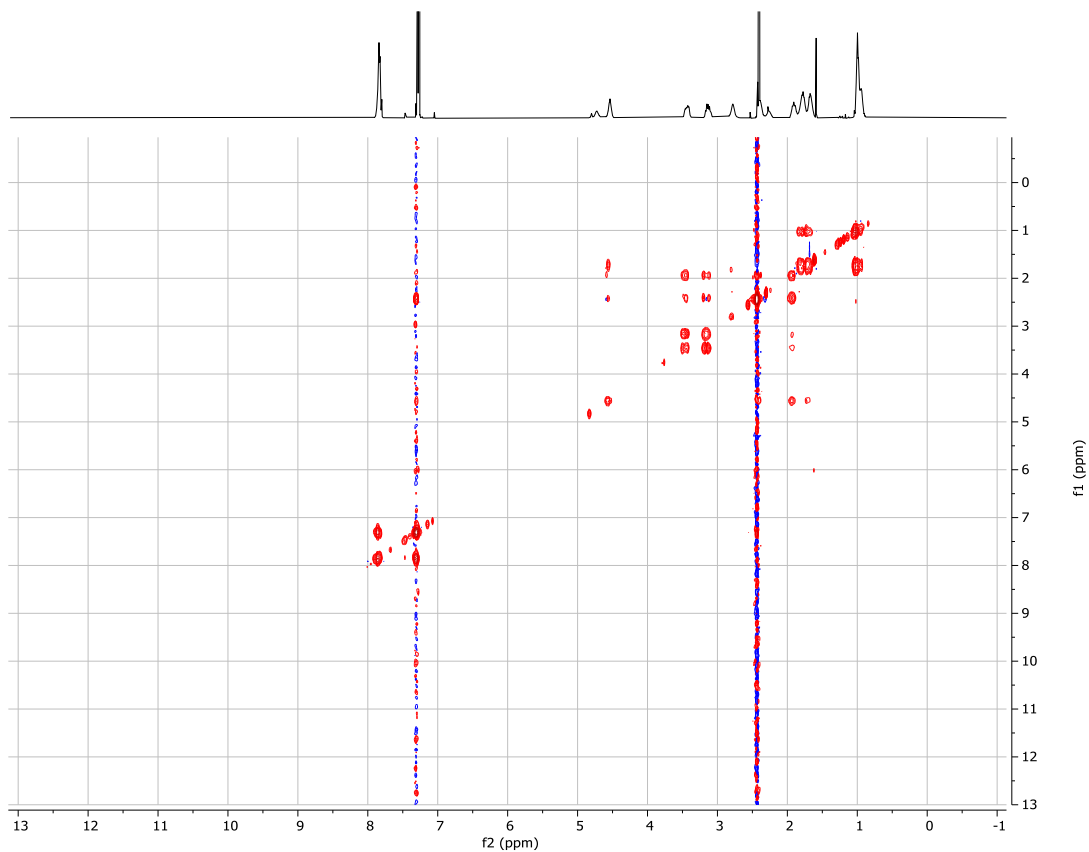

$^1\text{H}$ - $^{13}\text{C}$  HSQC

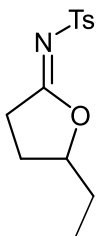

4t

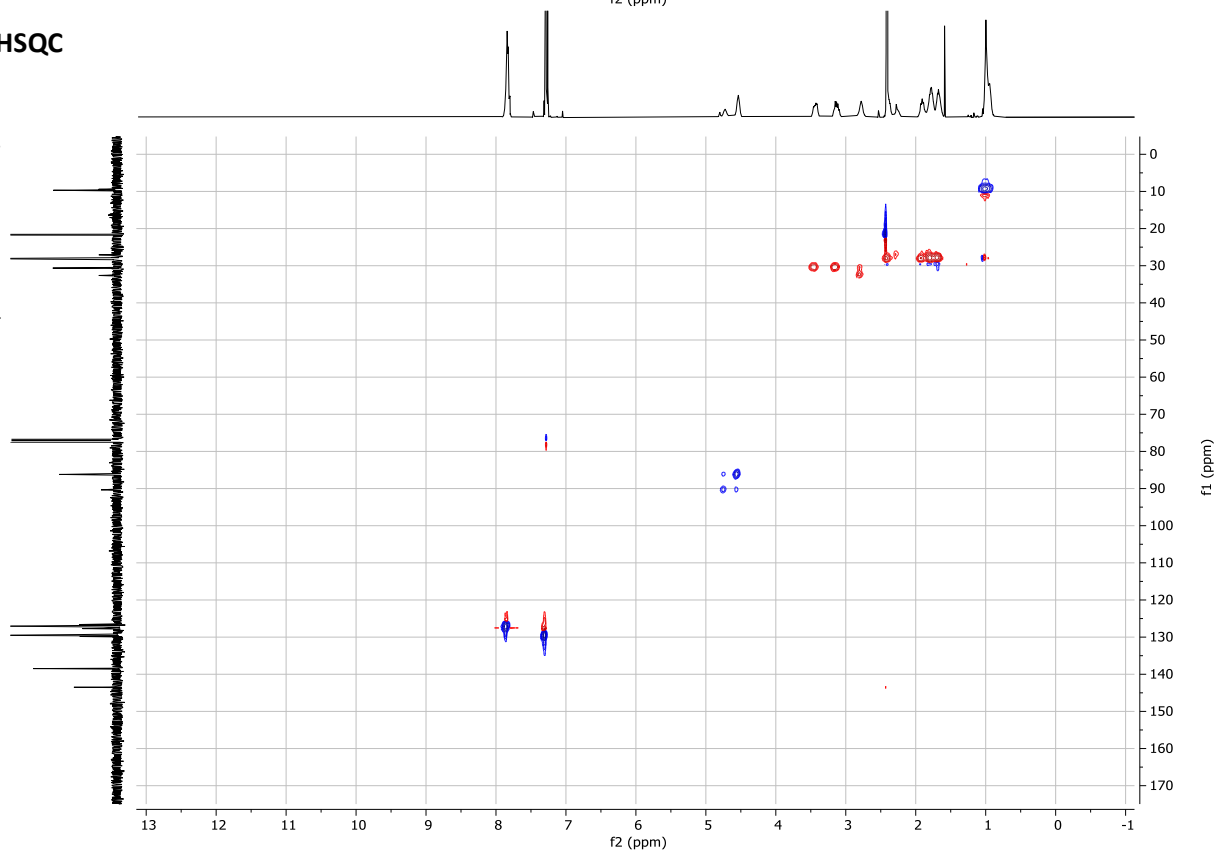

**<sup>1</sup>H NMR (500 MHz, CDCl<sub>3</sub>)**

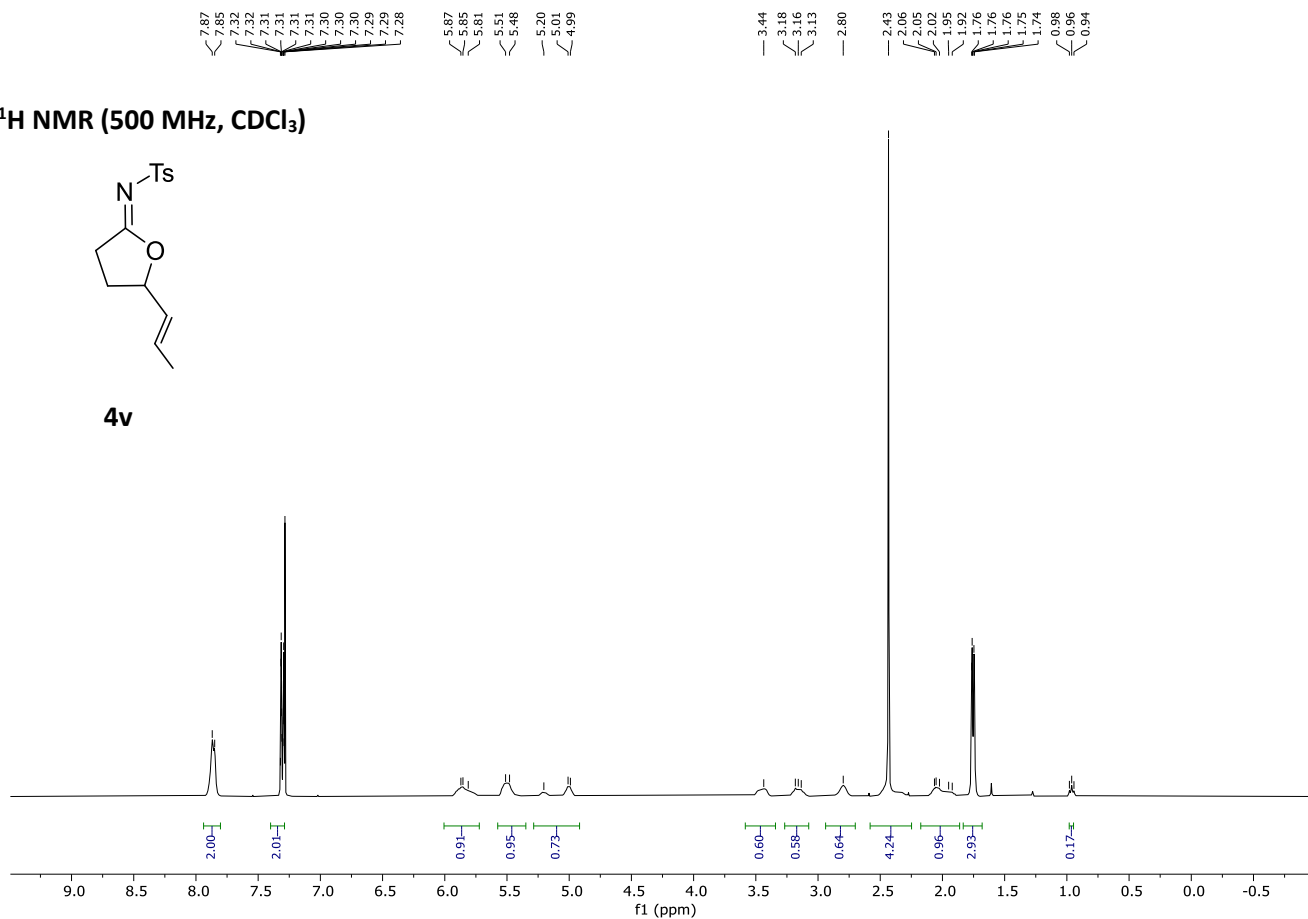

**<sup>13</sup>C NMR (126 MHz, CDCl<sub>3</sub>)**

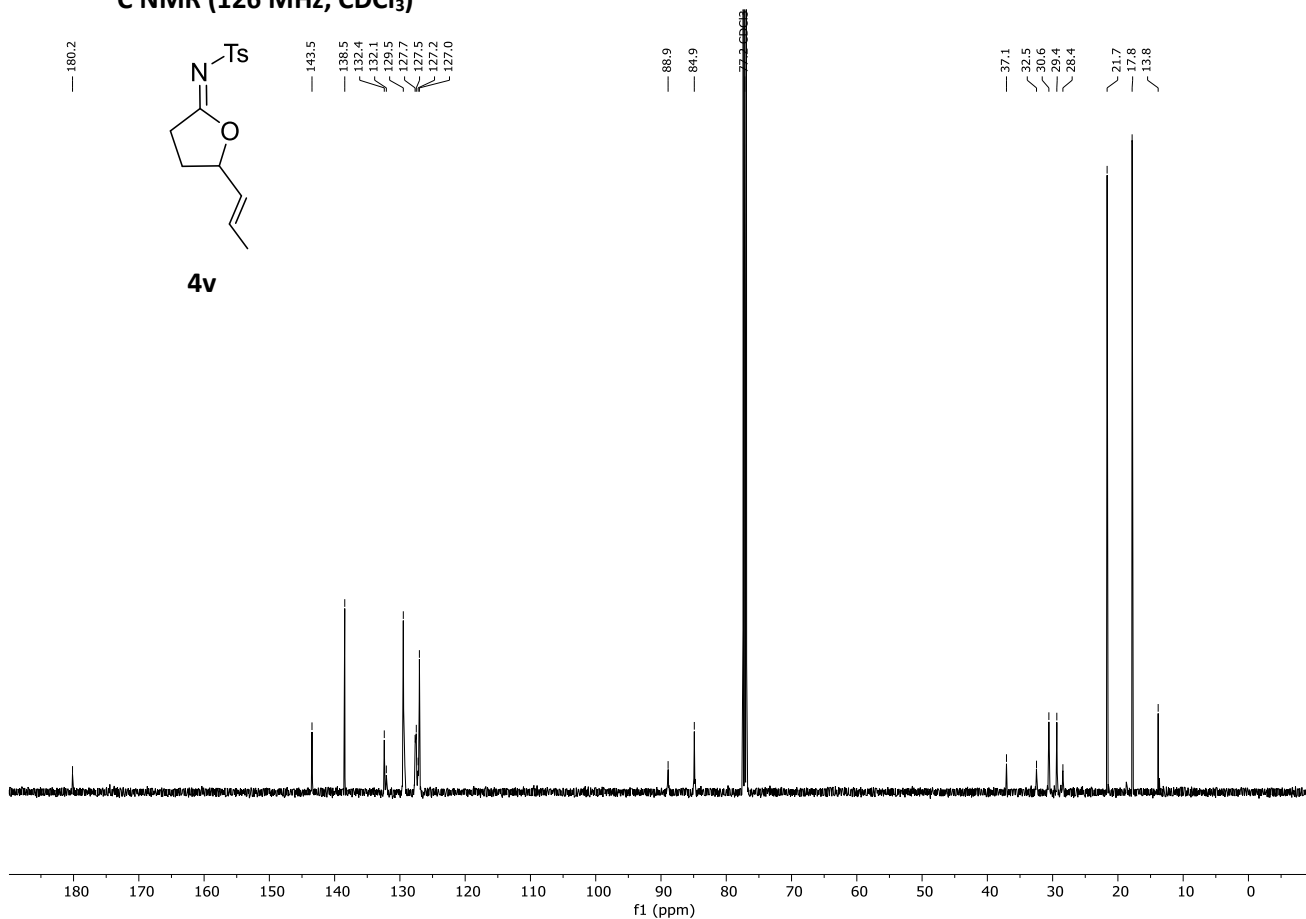

<sup>1</sup>H-<sup>1</sup>H COSY

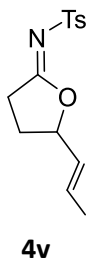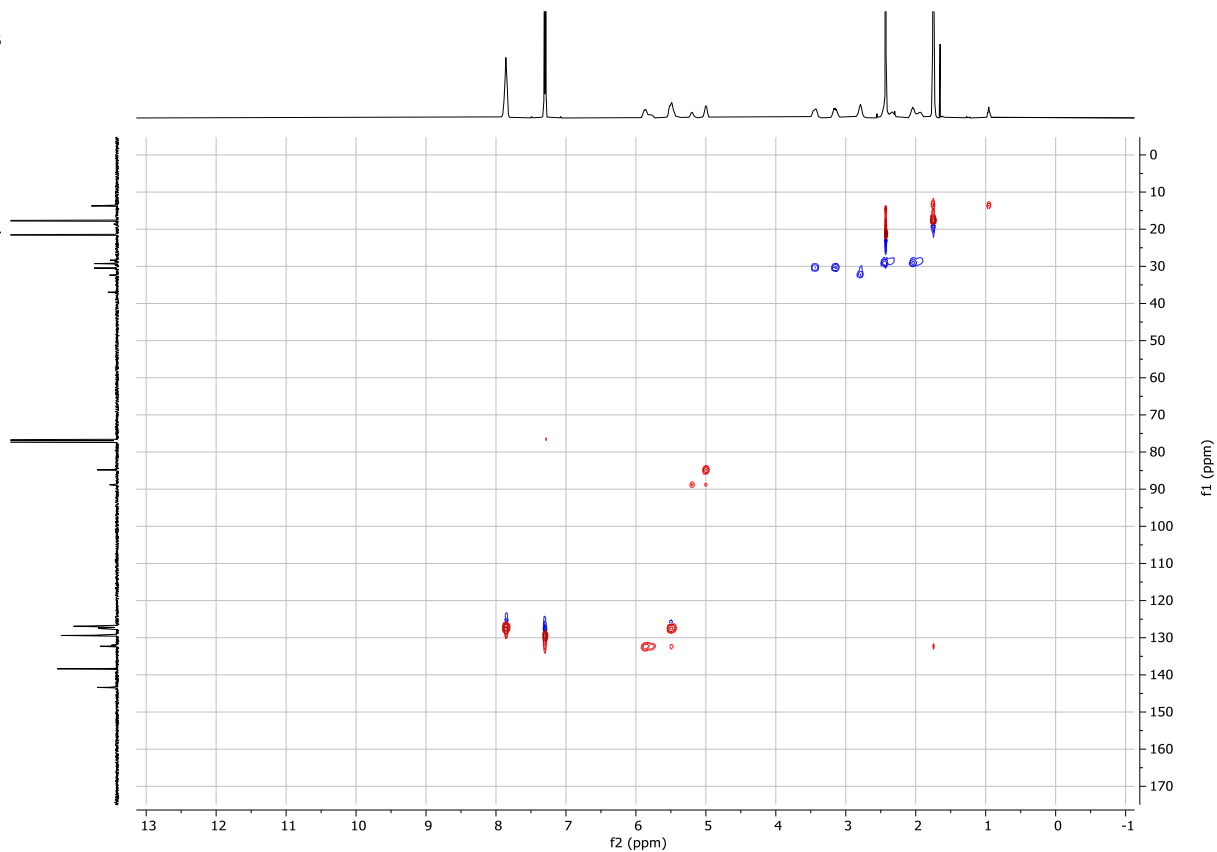

<sup>1</sup>H-<sup>13</sup>C HSQC

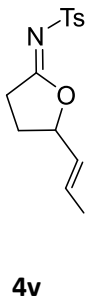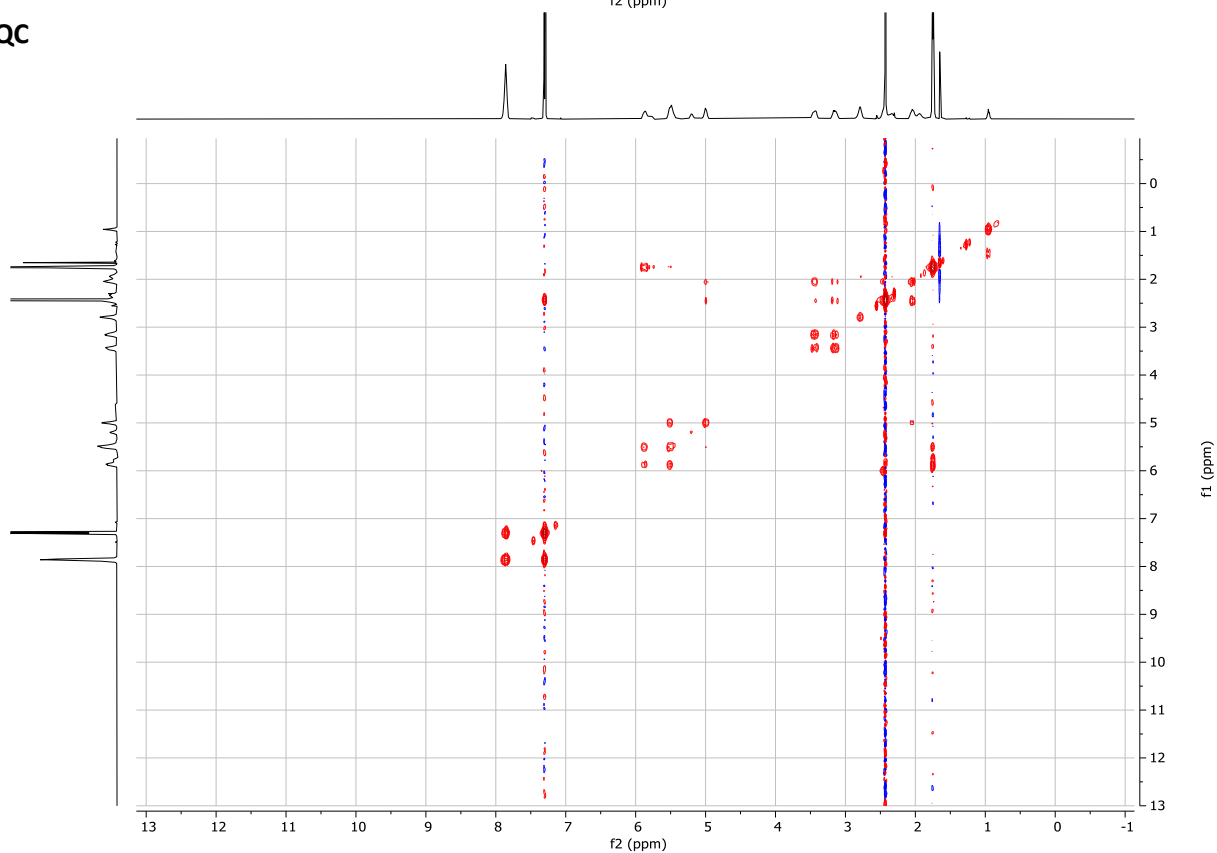

**<sup>1</sup>H NMR (500 MHz, CDCl<sub>3</sub>)**

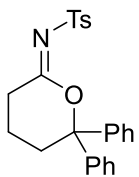

**4w**

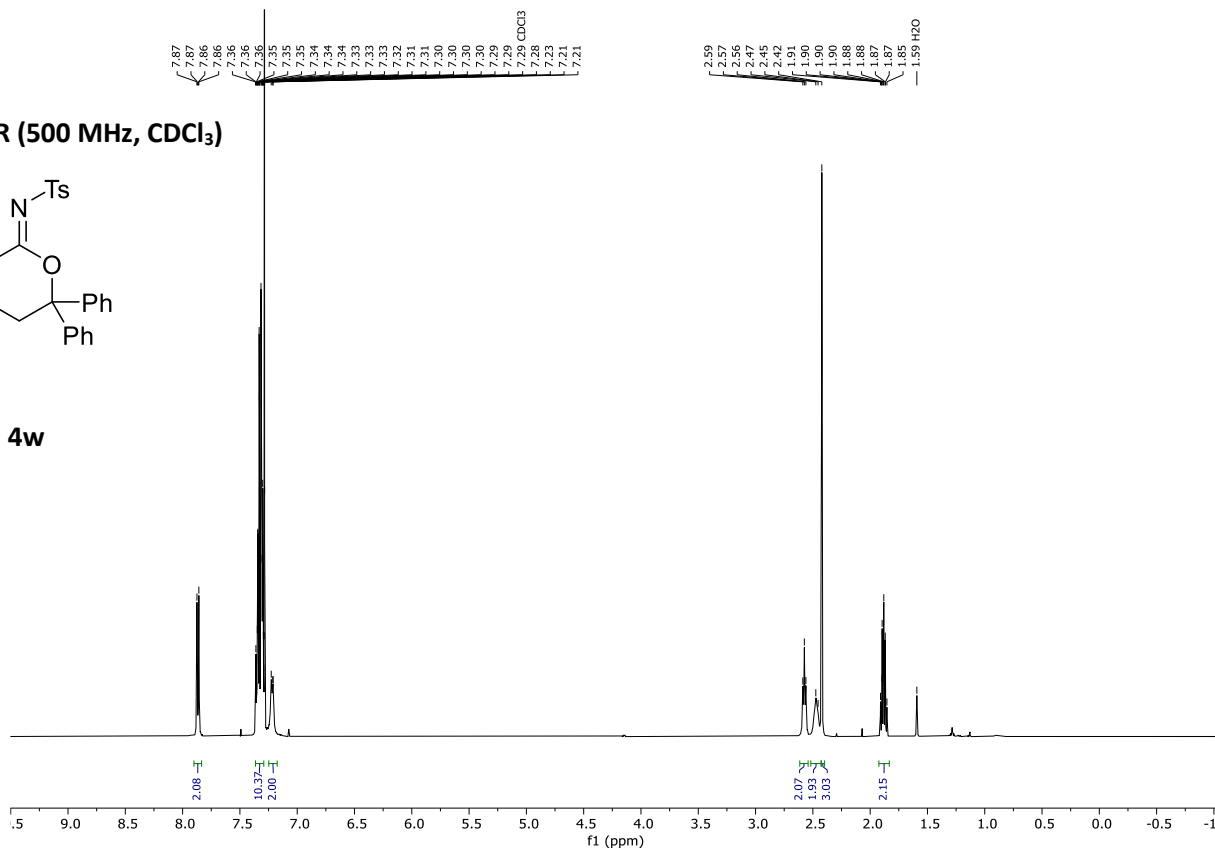

**<sup>13</sup>C NMR (126 MHz, CDCl<sub>3</sub>)**

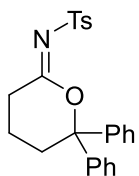

**4w**

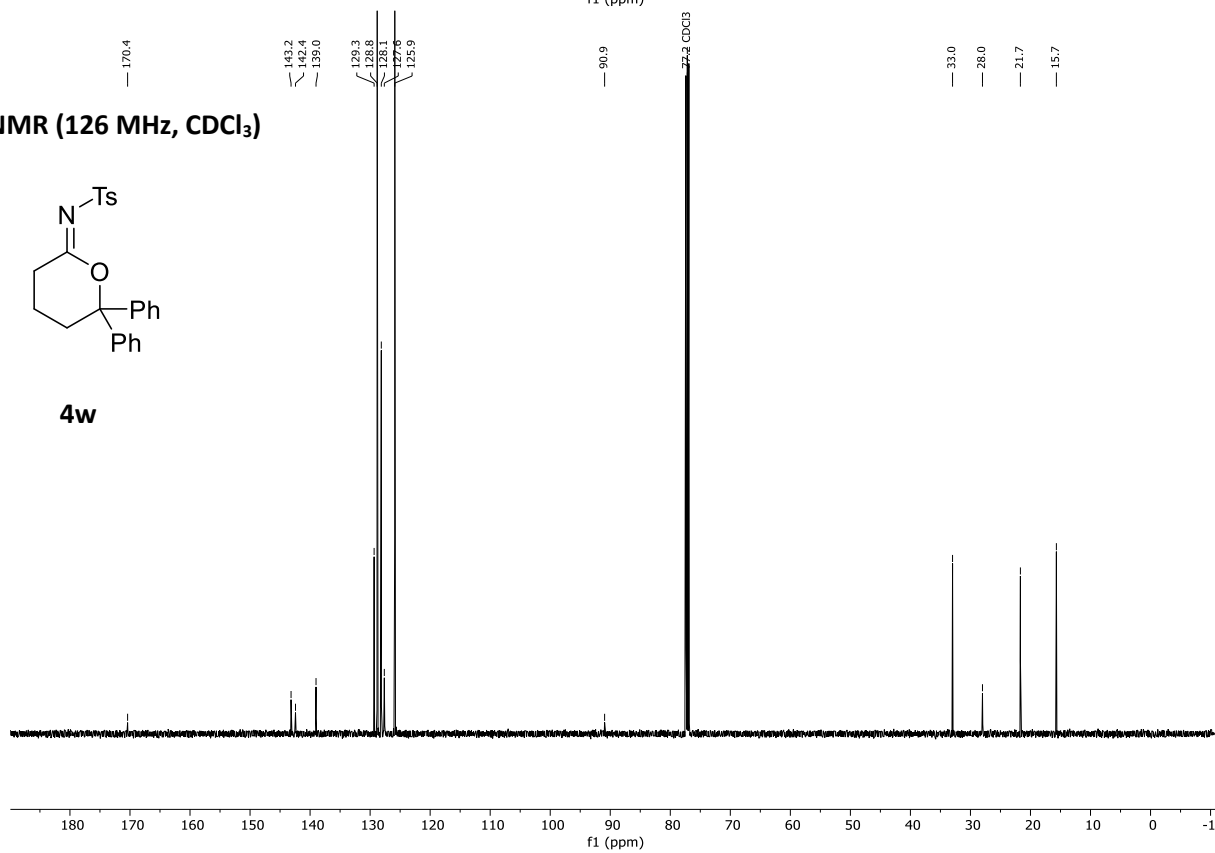



$^1\text{H}$ - $^{13}\text{C}$  HSQC

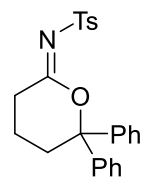

4w

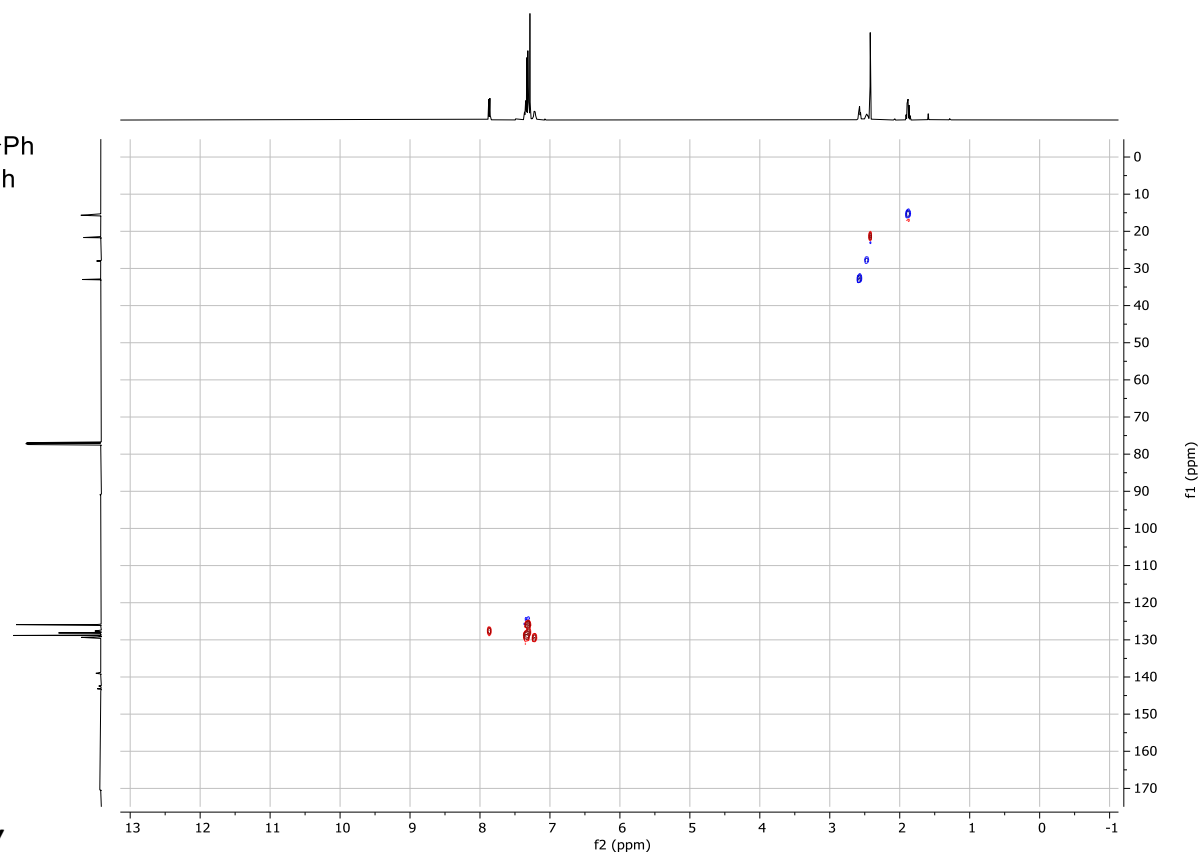

$^1\text{H}$ - $^1\text{H}$  COSY

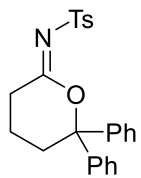

4w

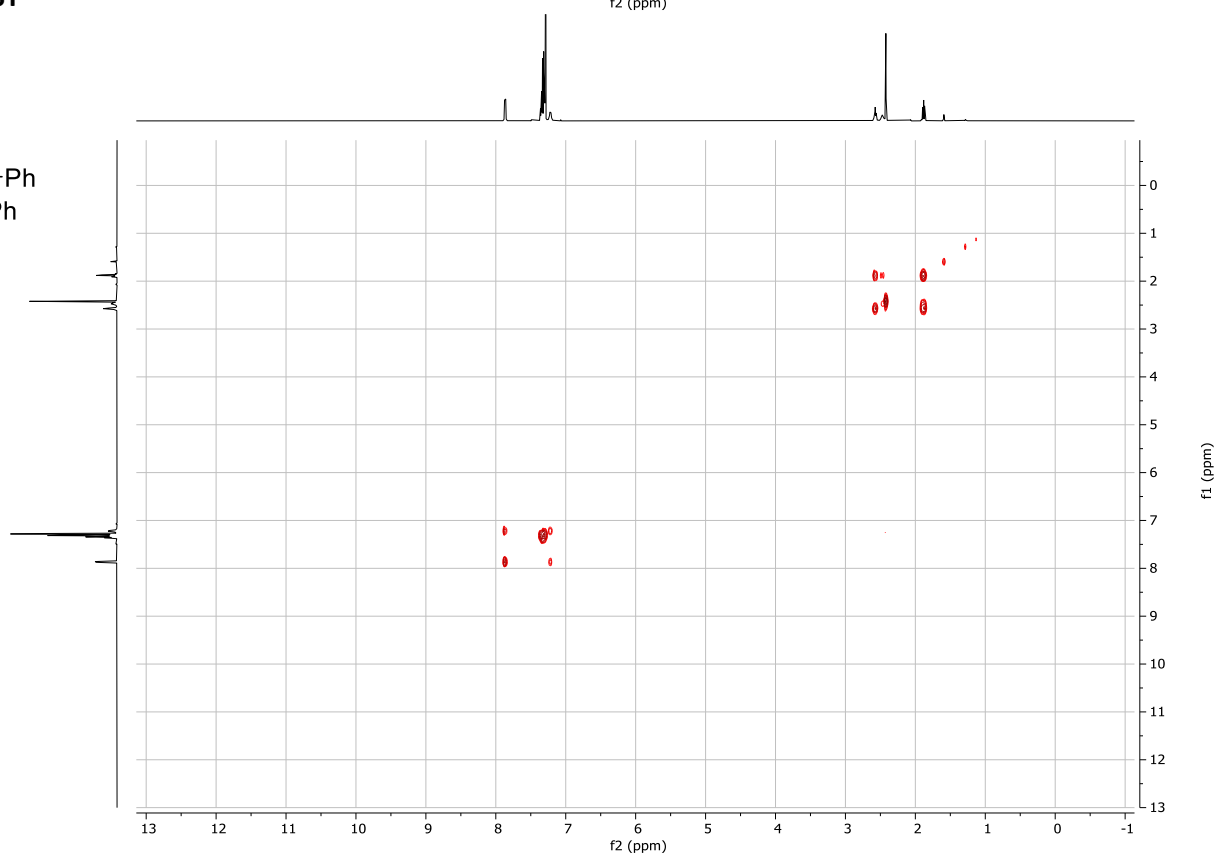

<sup>1</sup>H NMR (400 MHz, CDCl<sub>3</sub>)

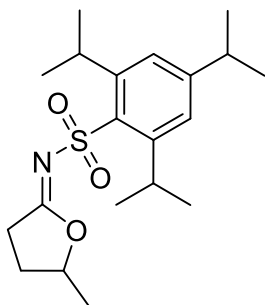

6a

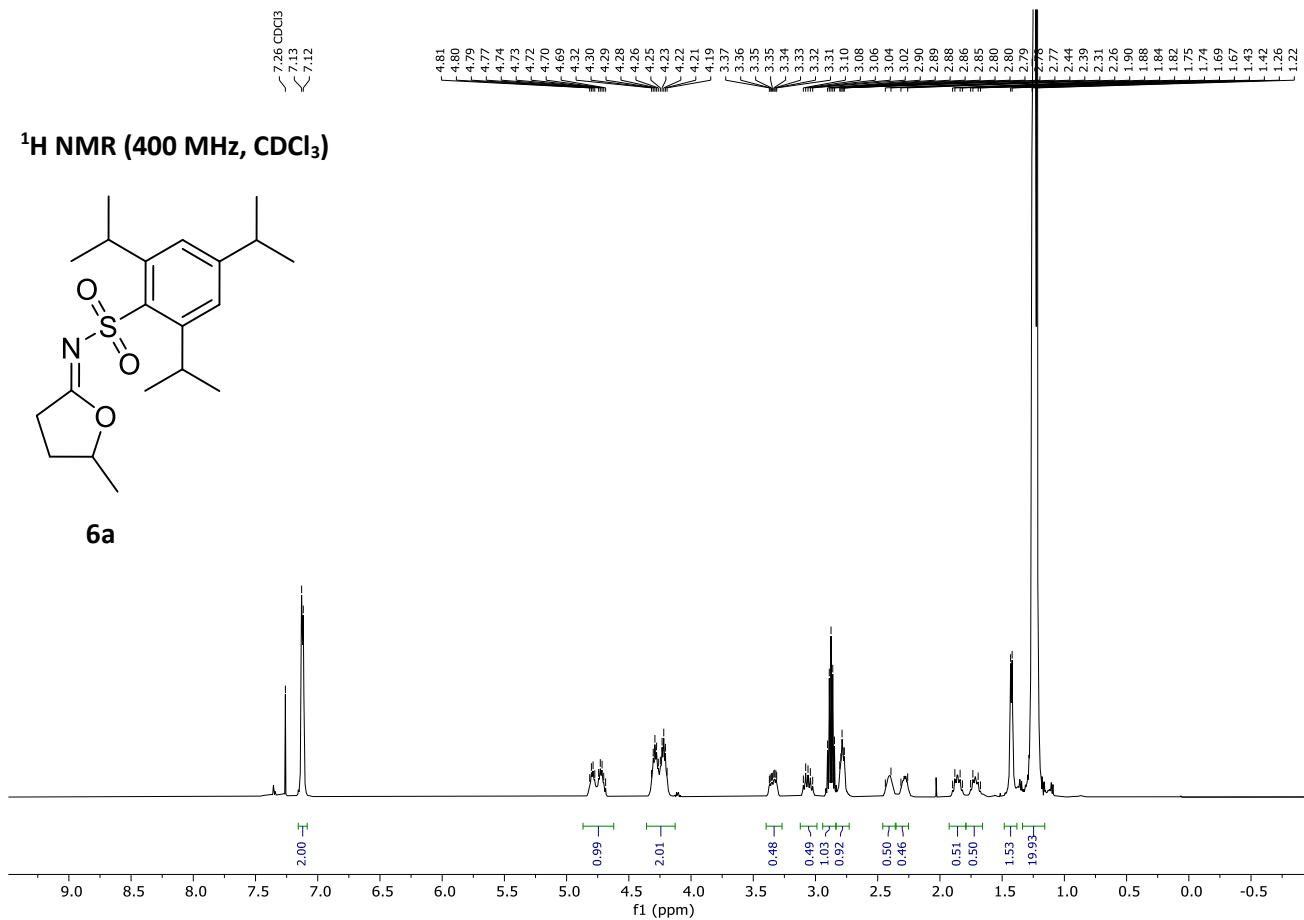

<sup>13</sup>C NMR (101 MHz, CDCl<sub>3</sub>)

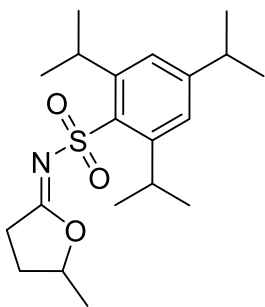

6a

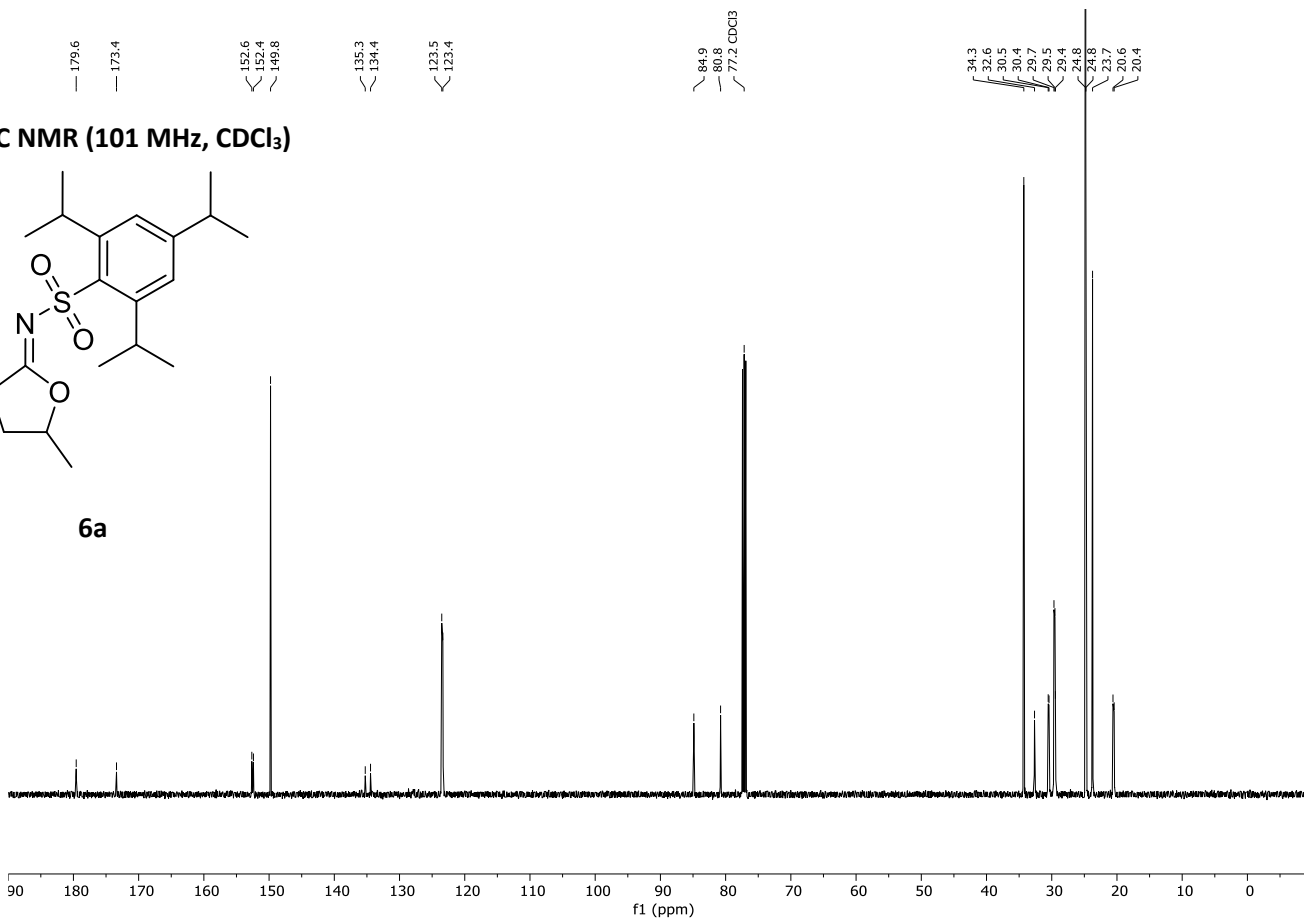

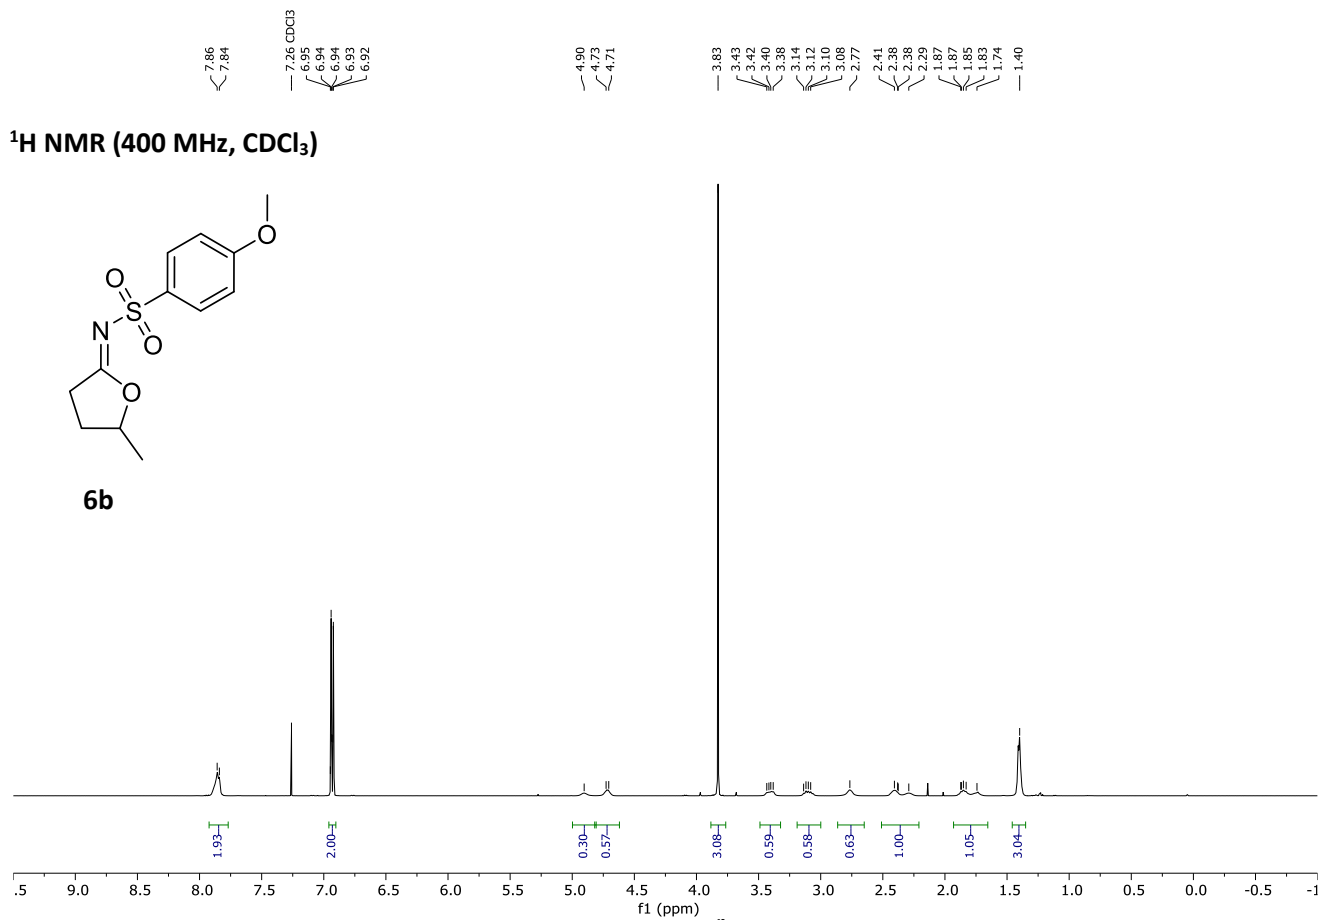

**<sup>13</sup>C NMR (101 MHz, CDCl<sub>3</sub>)**

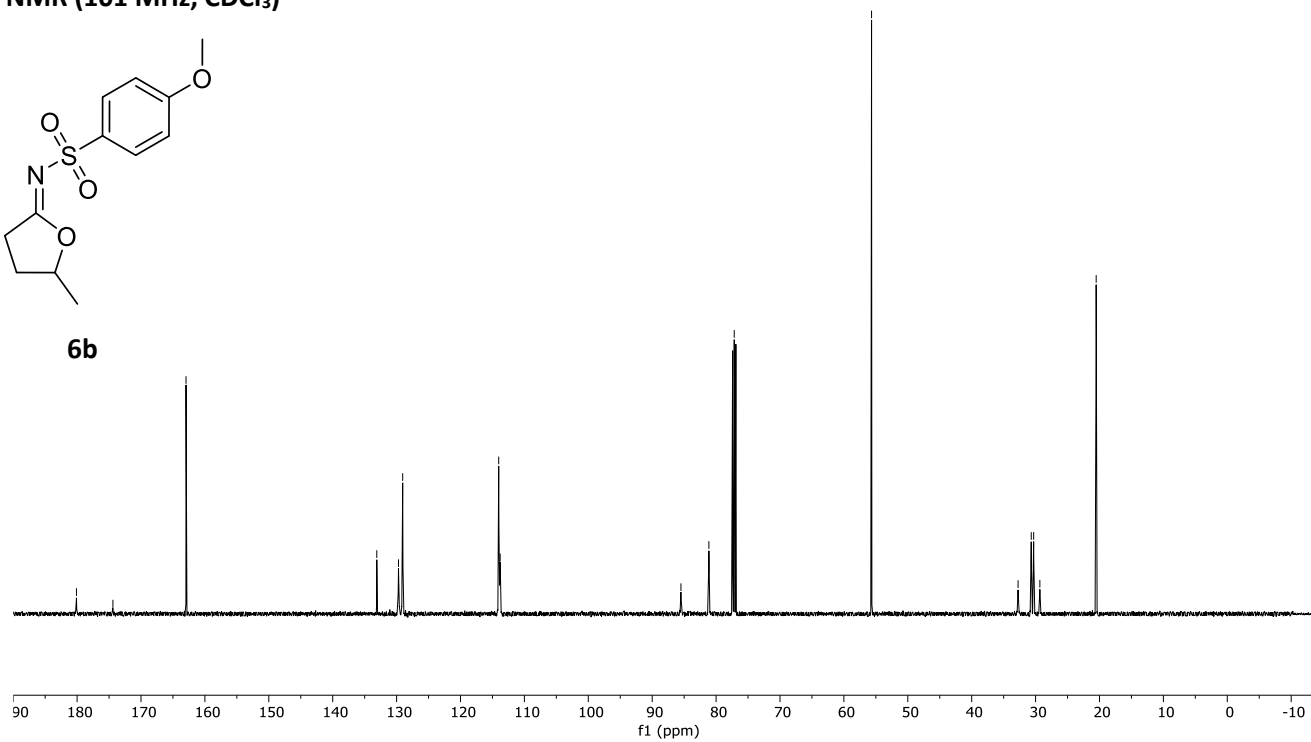

$^1\text{H}$ - $^{13}\text{C}$  HSQC

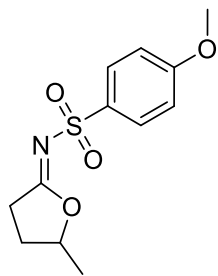

6b

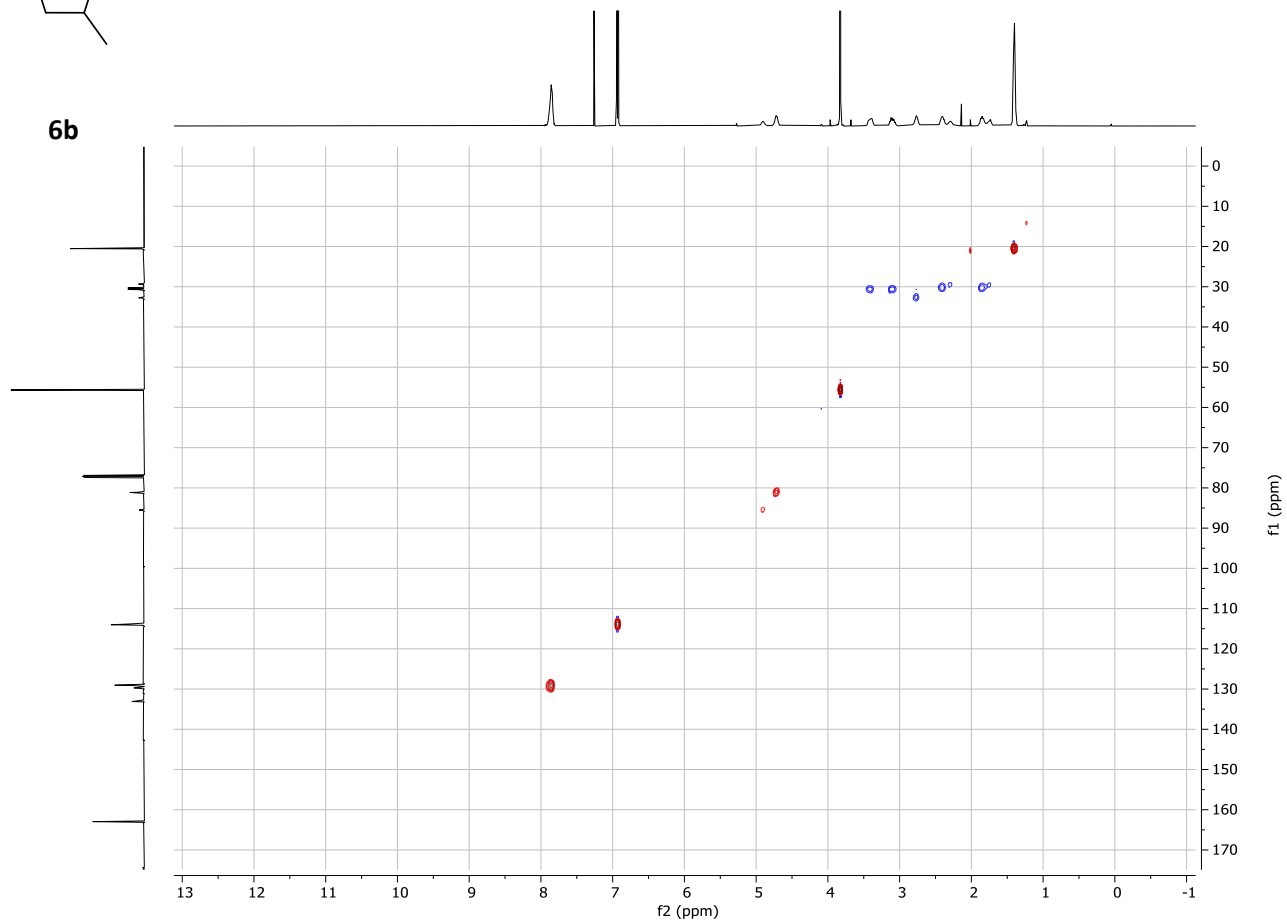

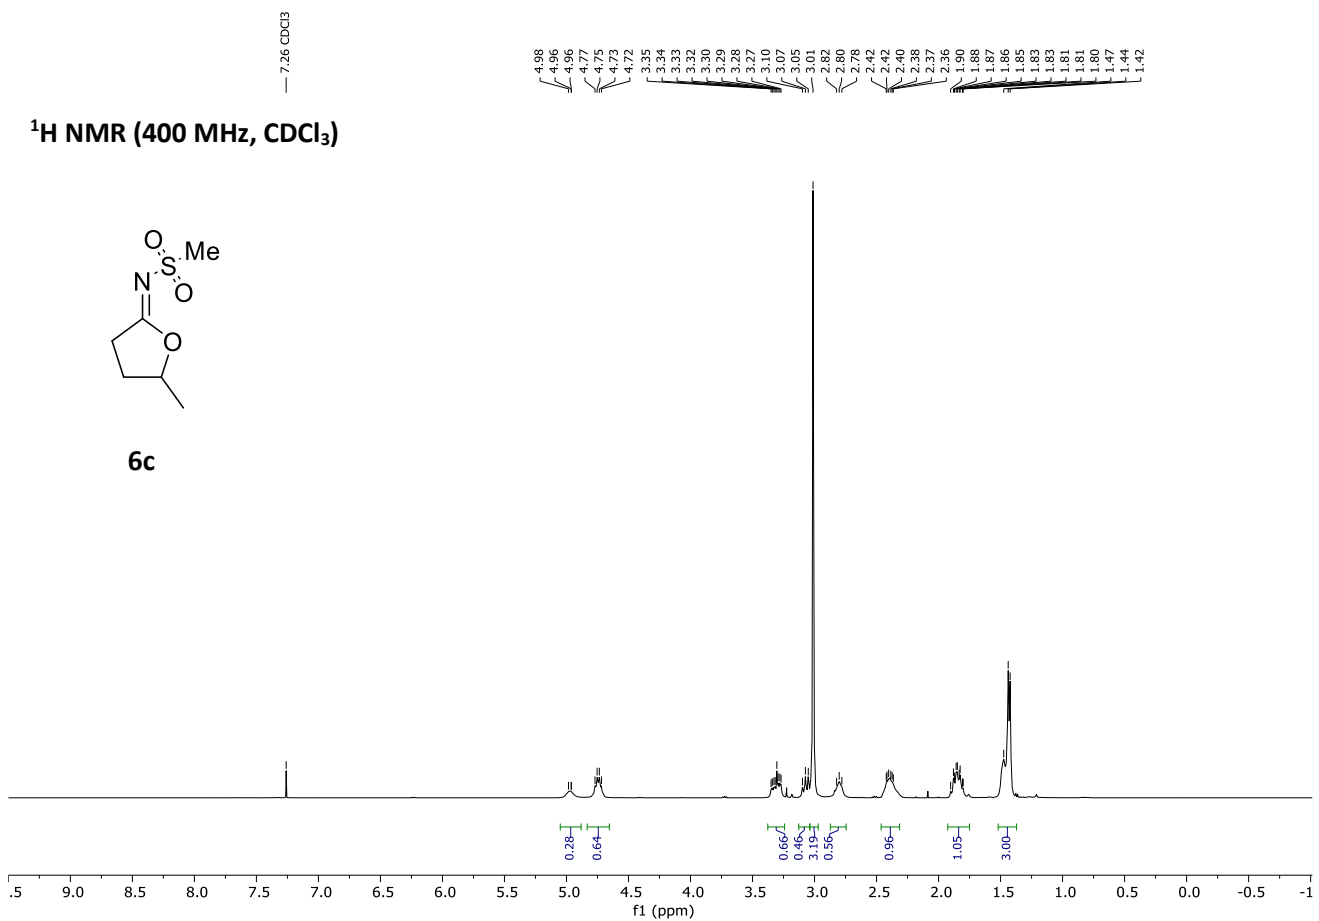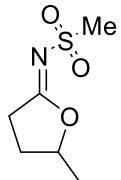

**6c**

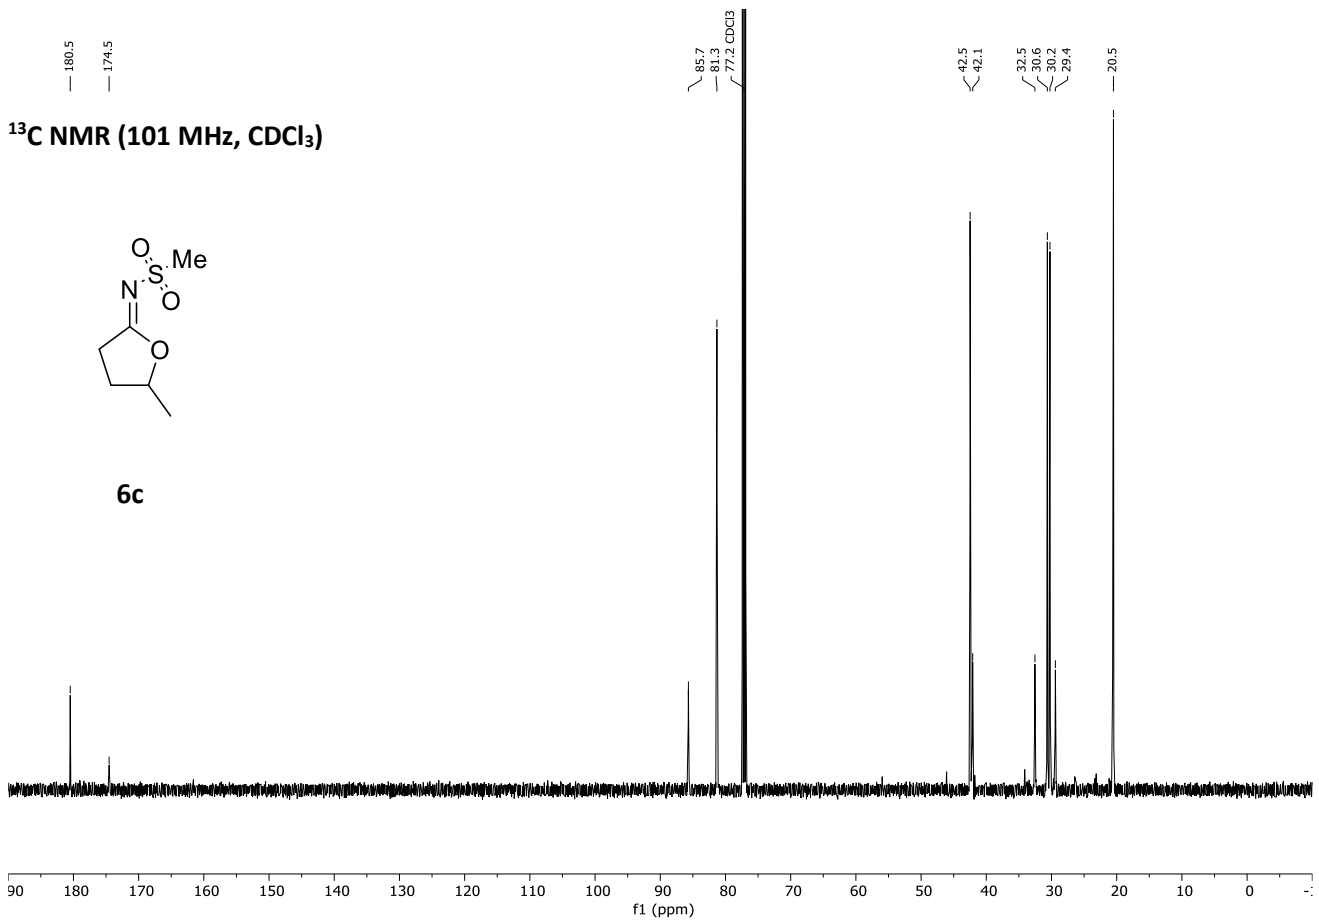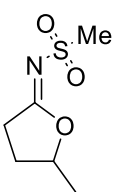

**6c**

$^1\text{H}$ - $^{13}\text{C}$  HSQC

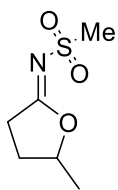

6c

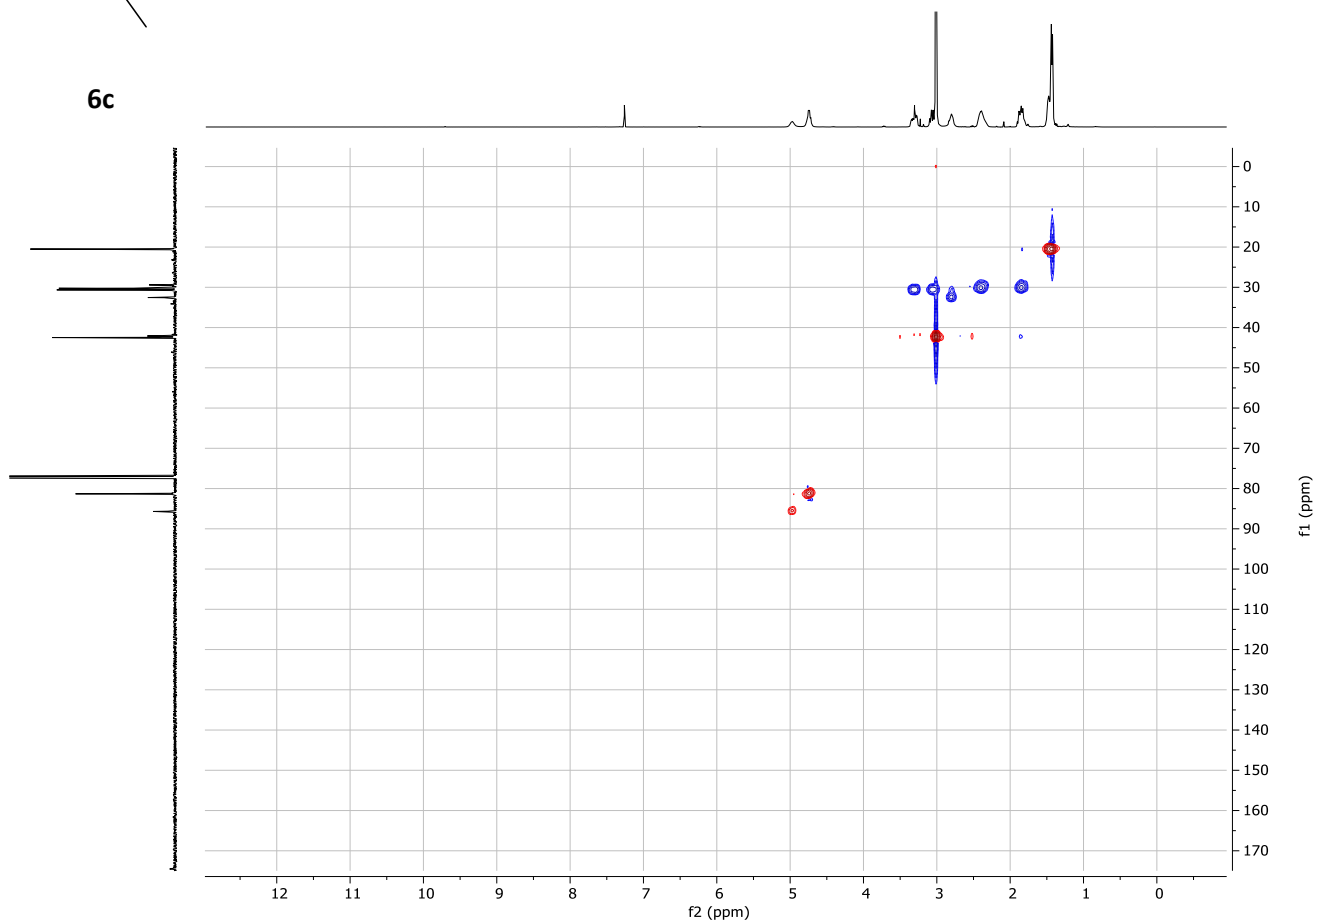

<sup>1</sup>H NMR (400 MHz, CDCl<sub>3</sub>)

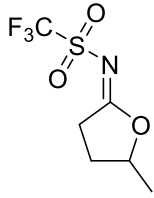

6d

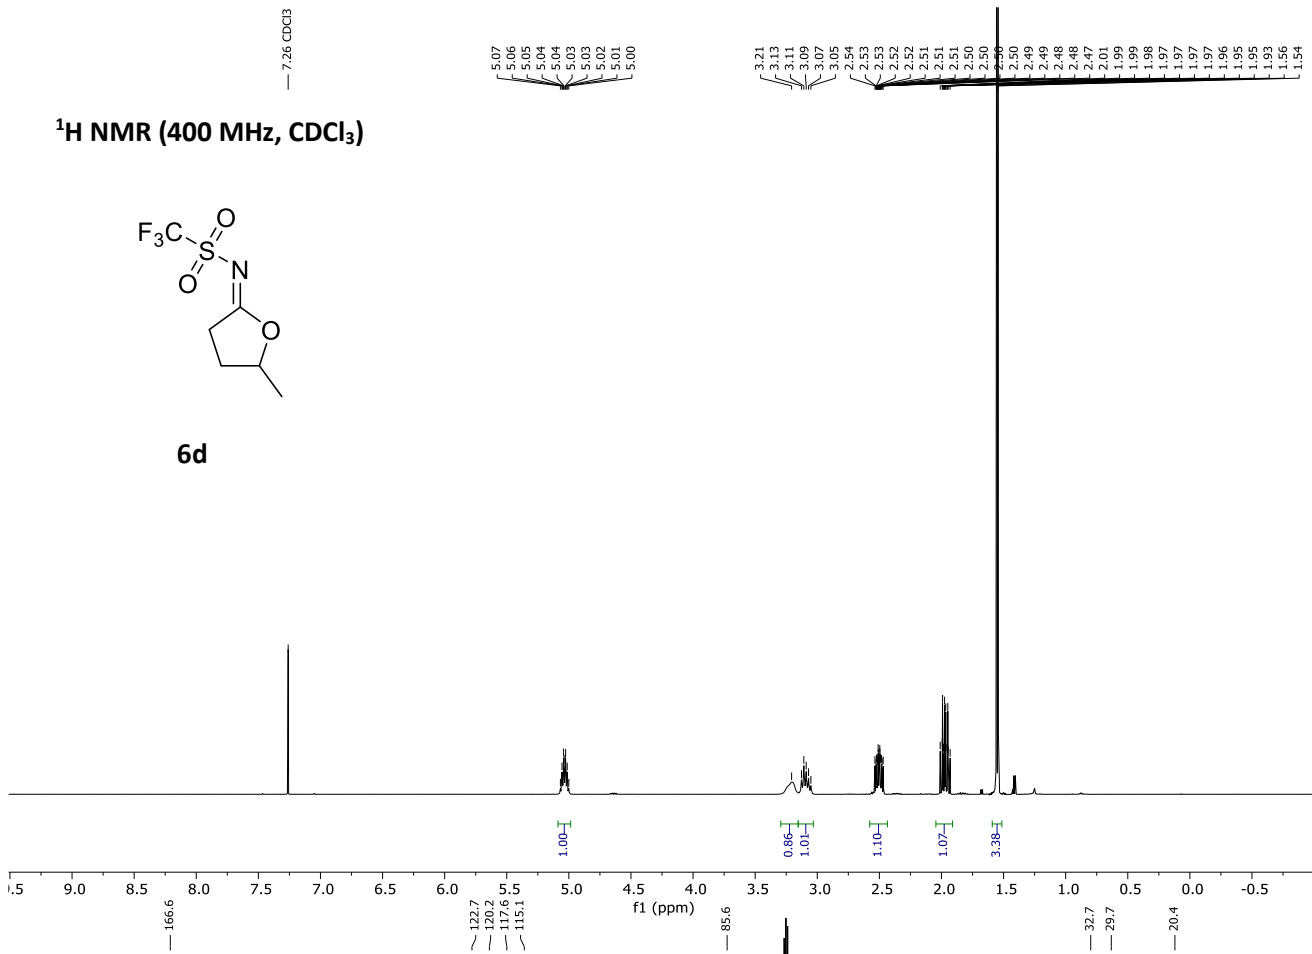

<sup>13</sup>C NMR (101 MHz, CDCl<sub>3</sub>)

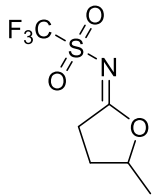

6d

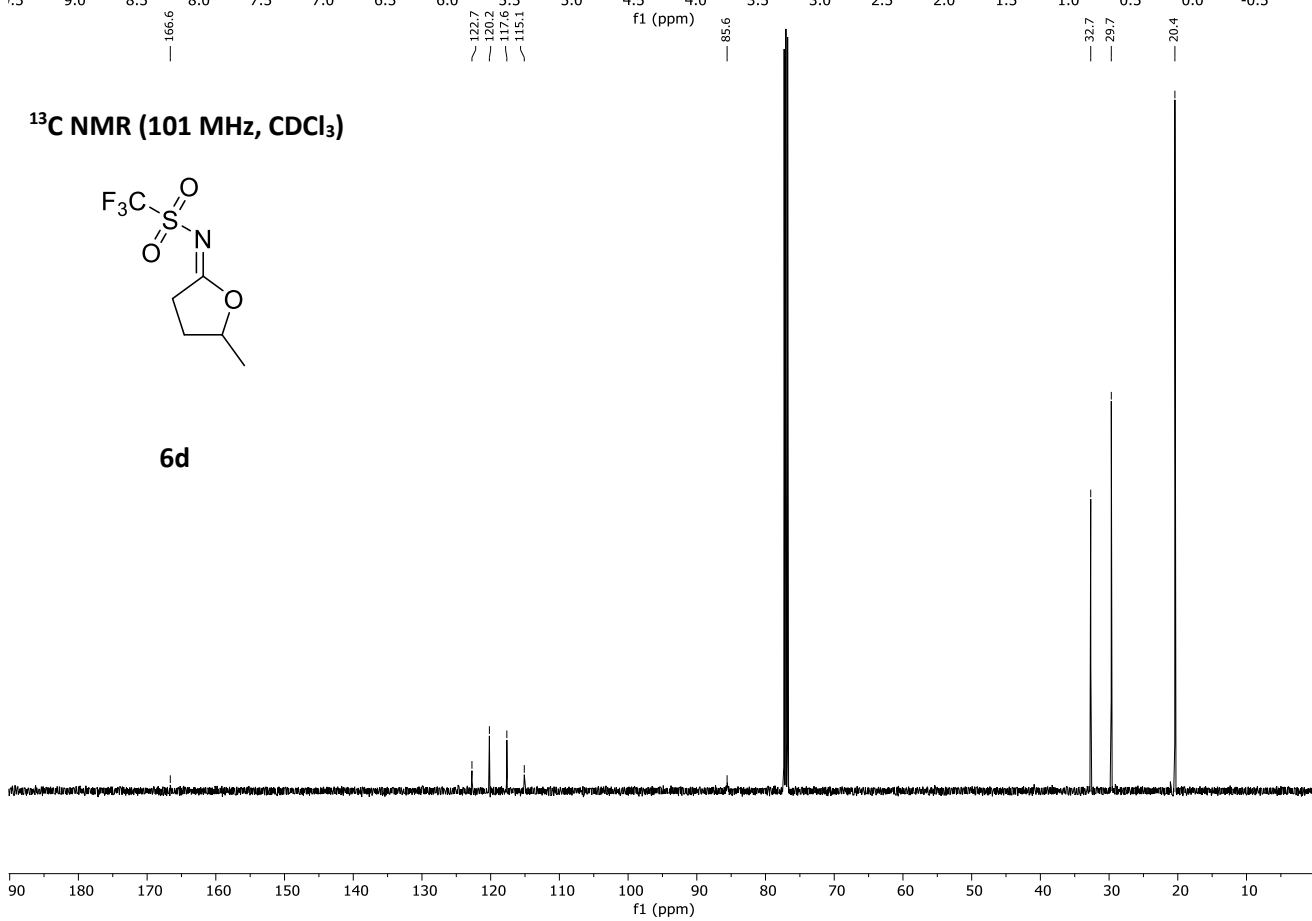

$^1\text{H}$ - $^{13}\text{C}$  HSQC

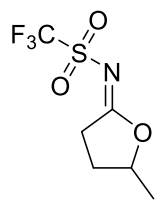

6d

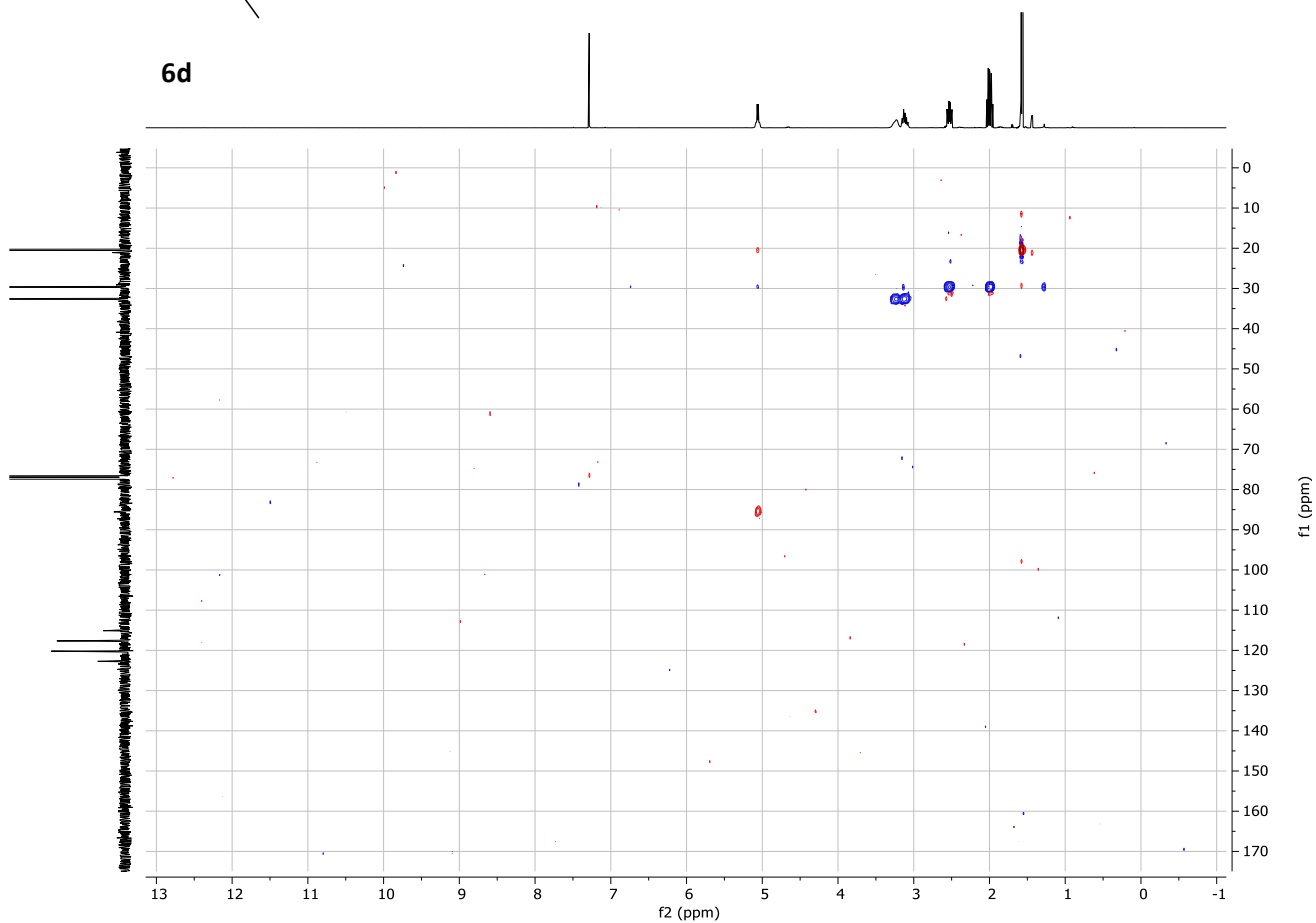



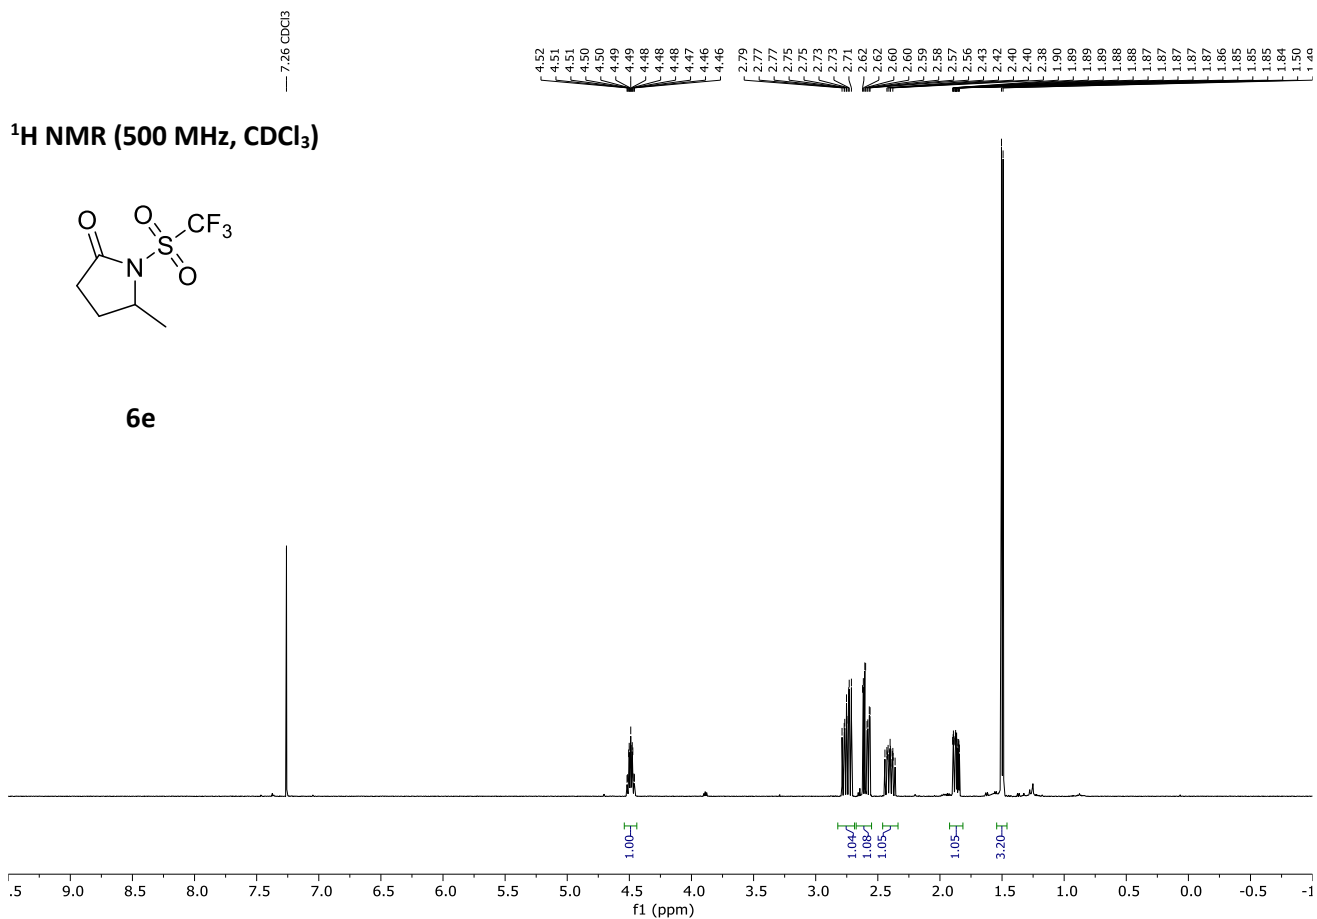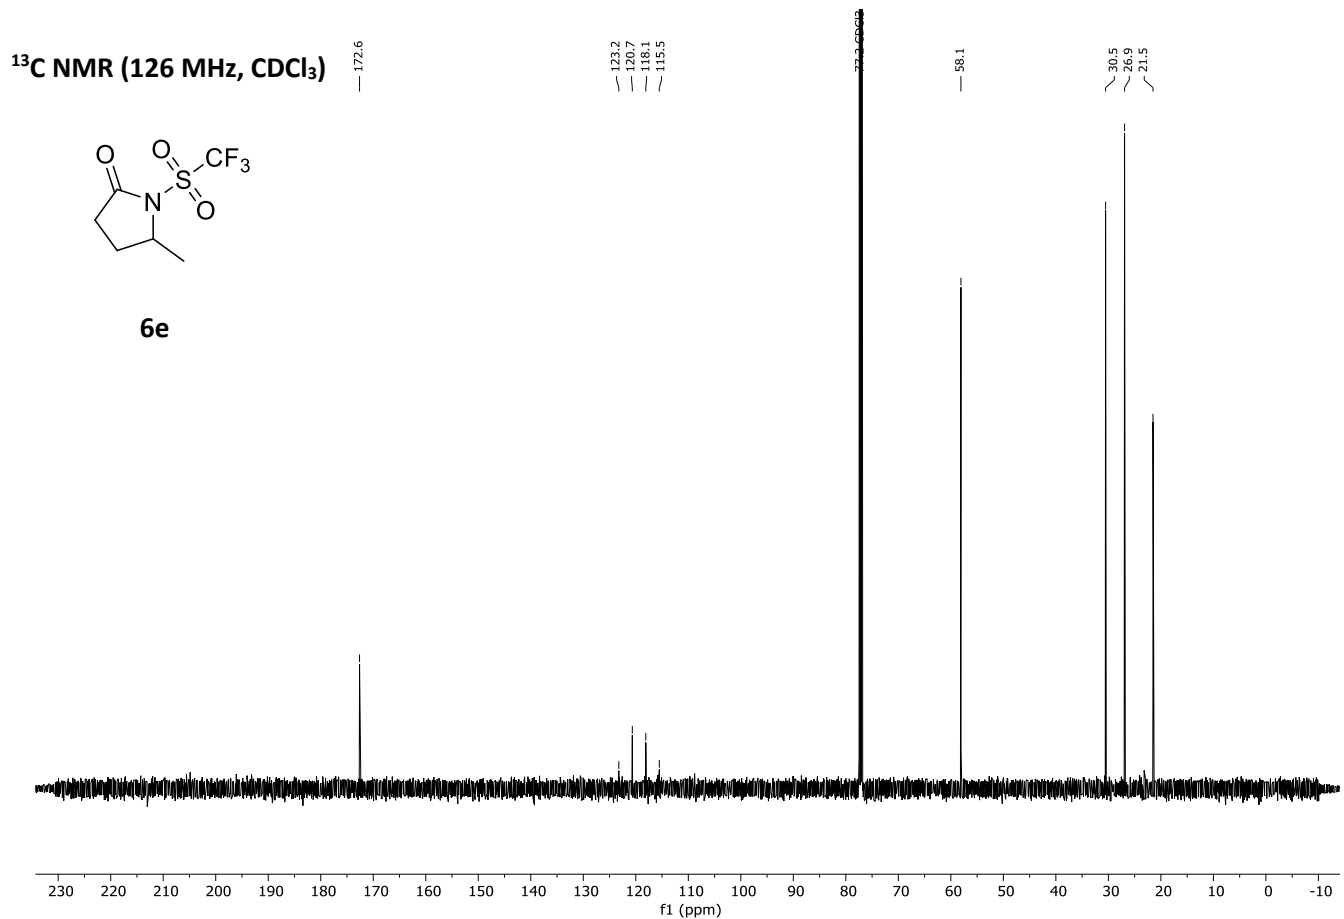

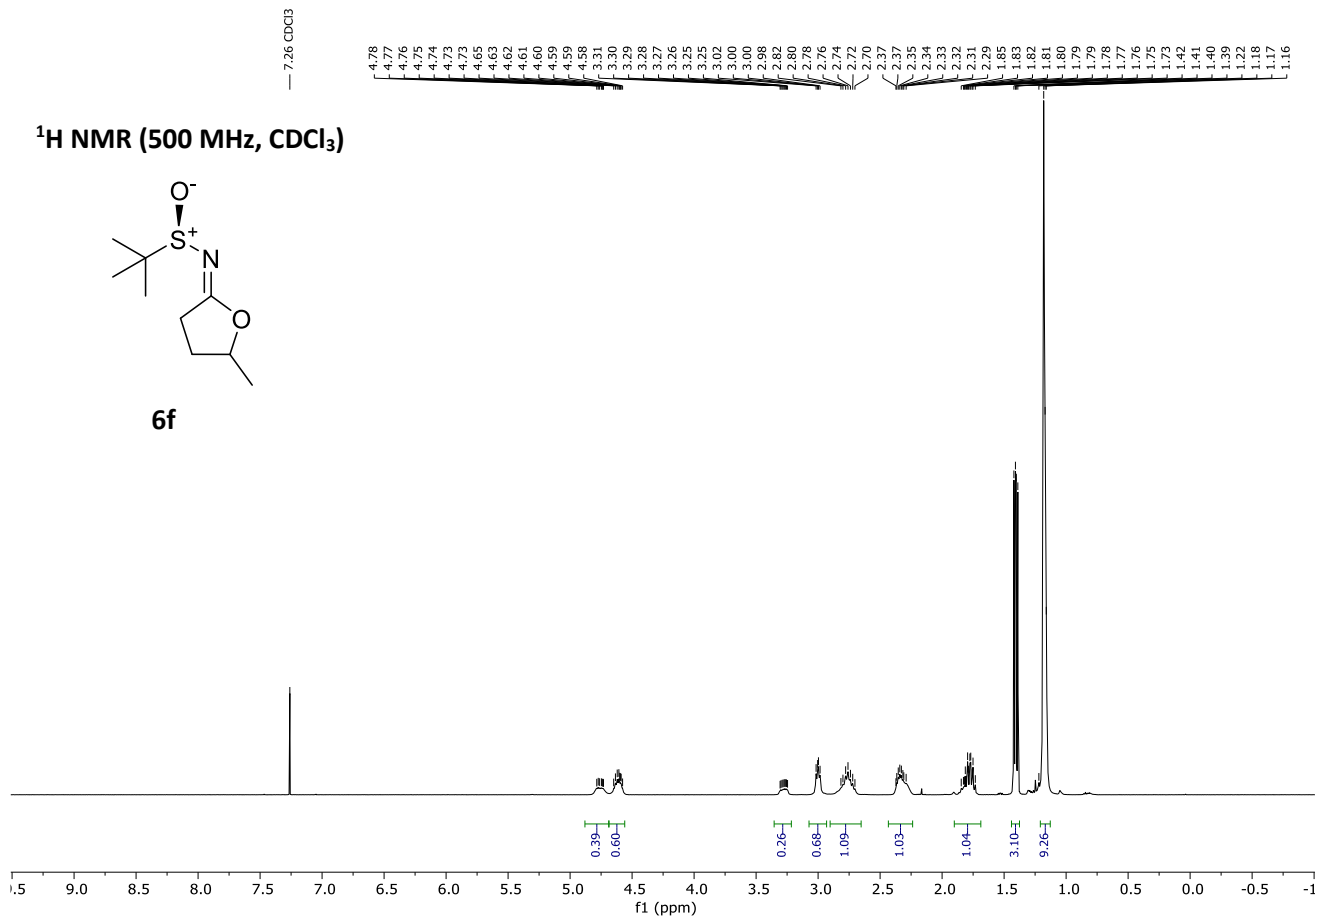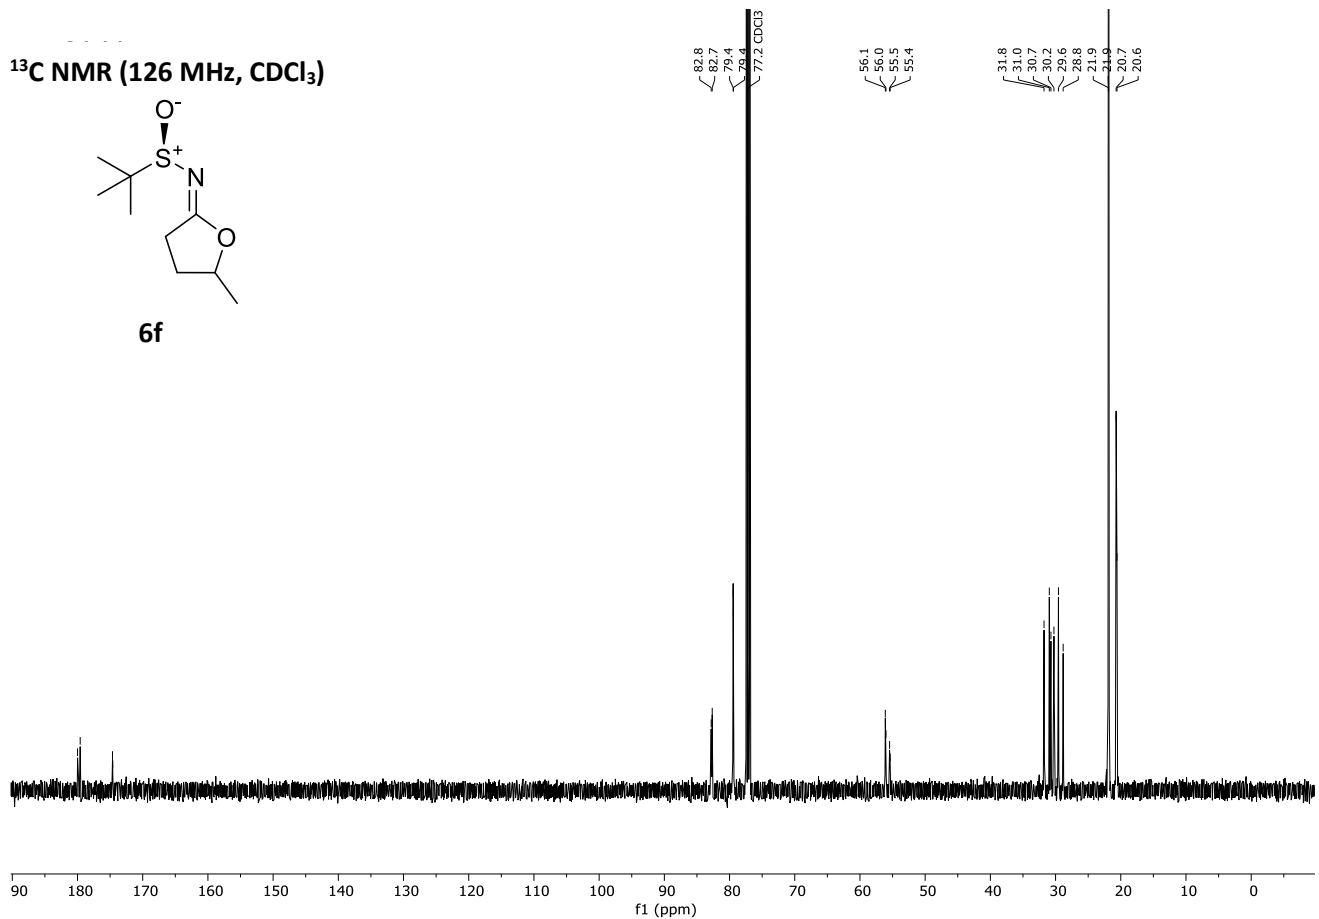

$^1\text{H}$ - $^{13}\text{C}$  HSQC

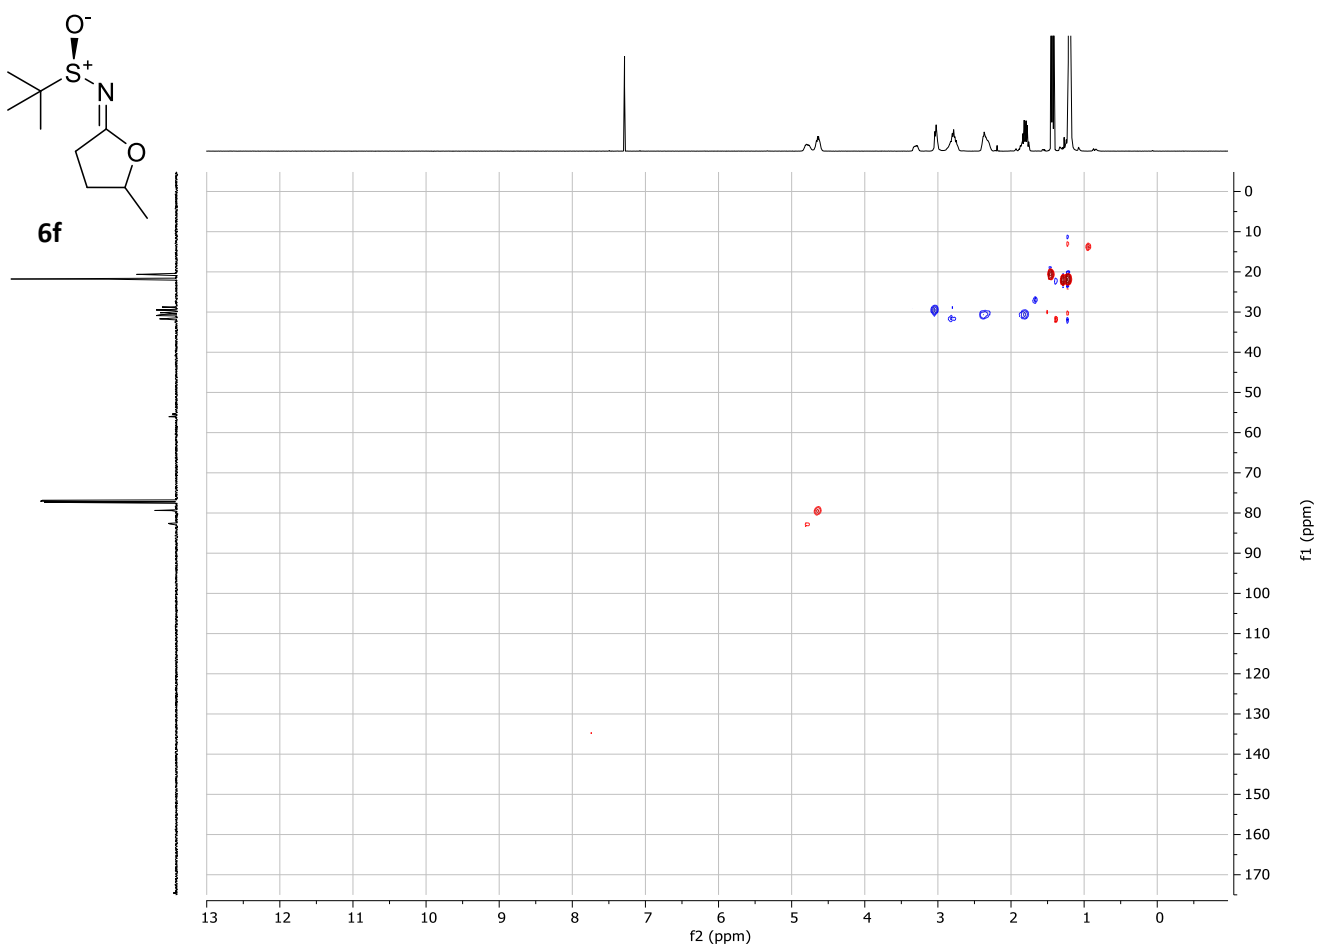

$^1\text{H}$  NMR (500 MHz,  $\text{CDCl}_3$ , 100 °C)

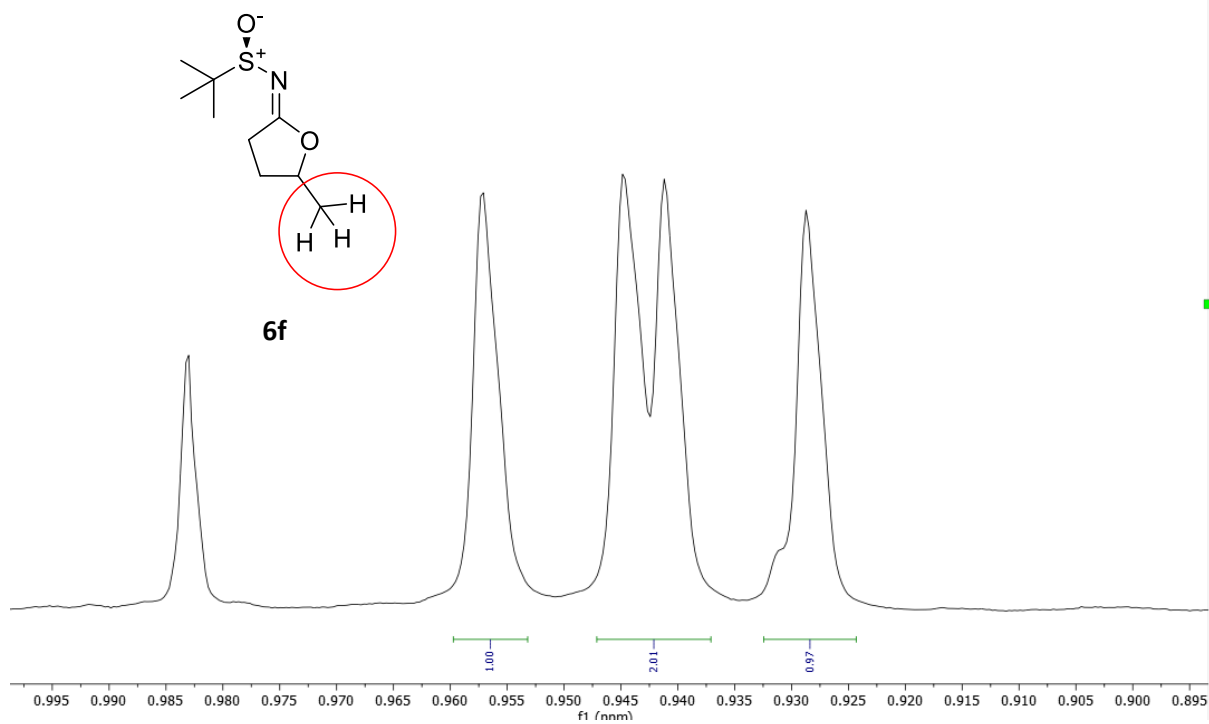

<sup>1</sup>H NMR (400 MHz, CDCl<sub>3</sub>)

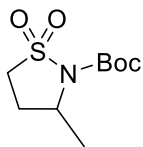

**6g**

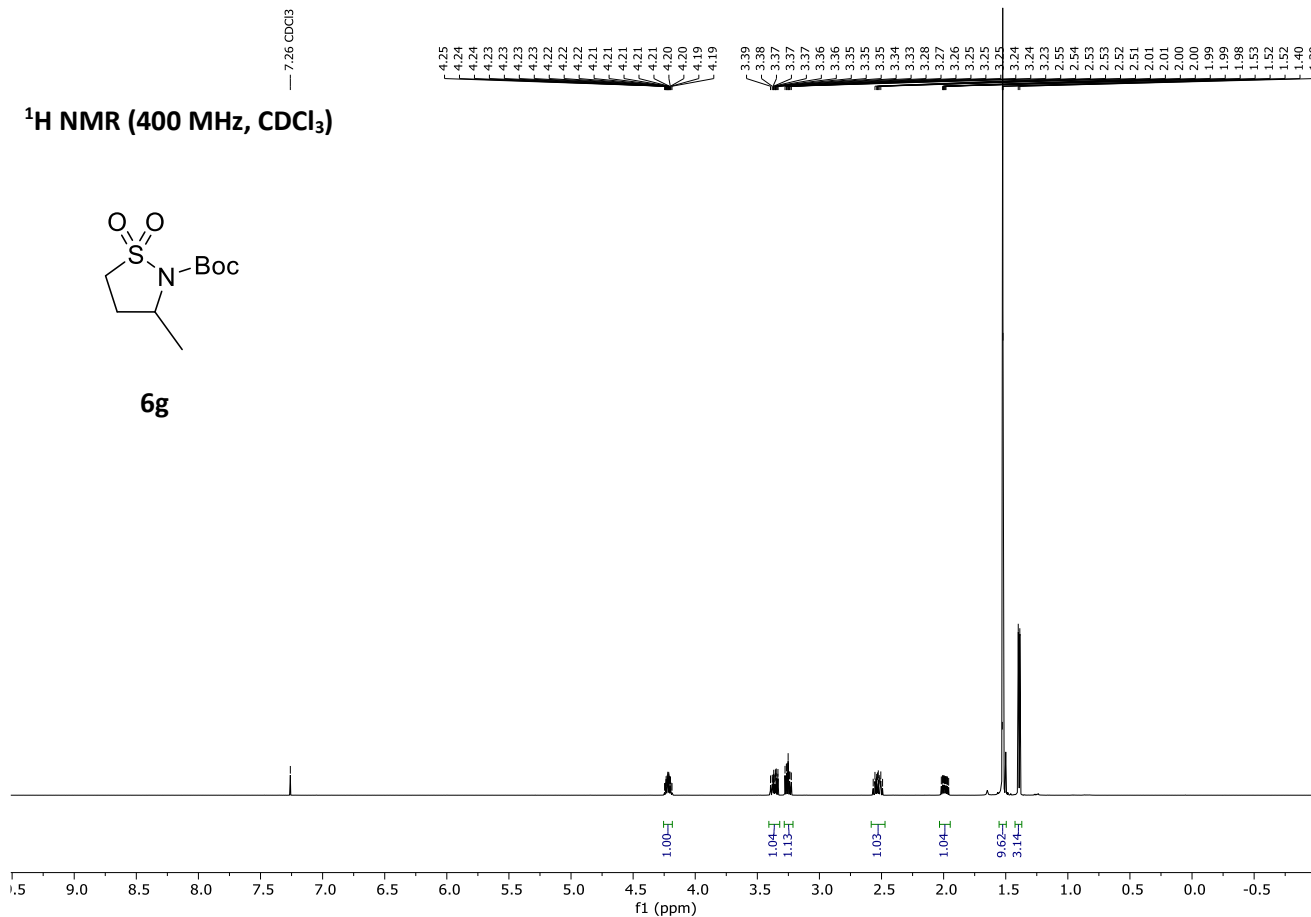

<sup>13</sup>C NMR (101 MHz, CDCl<sub>3</sub>)

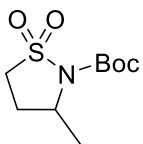

**6g**

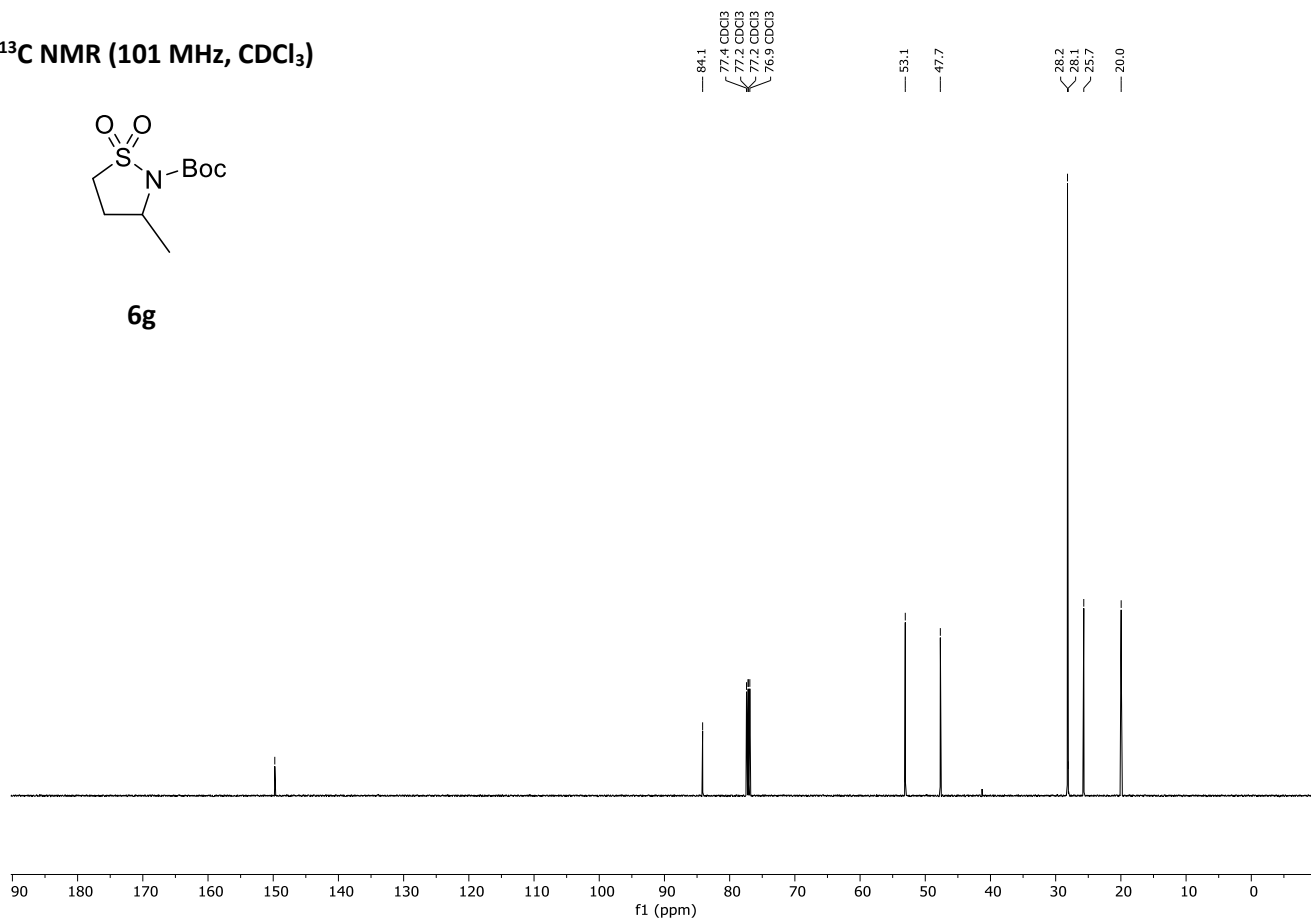

8.08  
8.07  
8.07  
7.54  
7.54  
7.54  
7.53  
7.53  
7.52  
7.51  
7.51  
7.50  
7.50  
7.50  
7.26 CDCl<sub>3</sub>  
7.24  
7.24  
7.23  
7.23  
7.23  
7.23  
7.23  
7.22  
7.22  
7.22  
7.22  
7.22  
7.21  
7.21  
7.21  
4.71  
4.70  
4.69  
4.68  
4.68  
4.67  
4.67  
4.66  
4.66  
4.65  
4.65  
4.64  
2.99  
2.99  
2.98  
2.97  
2.97  
2.96  
2.96  
2.95  
2.95  
2.94  
2.93  
2.93  
2.92  
2.92  
2.90  
2.90  
2.89  
2.89  
1.54  
1.54  
1.53  
1.53  
1.53  
1.52  
1.52  
1.52  
1.51  
1.51  
1.51  
1.50  
1.50  
1.50  
1.49  
1.49

**<sup>1</sup>H NMR (400 MHz, CDCl<sub>3</sub>)**

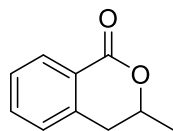

**7a**

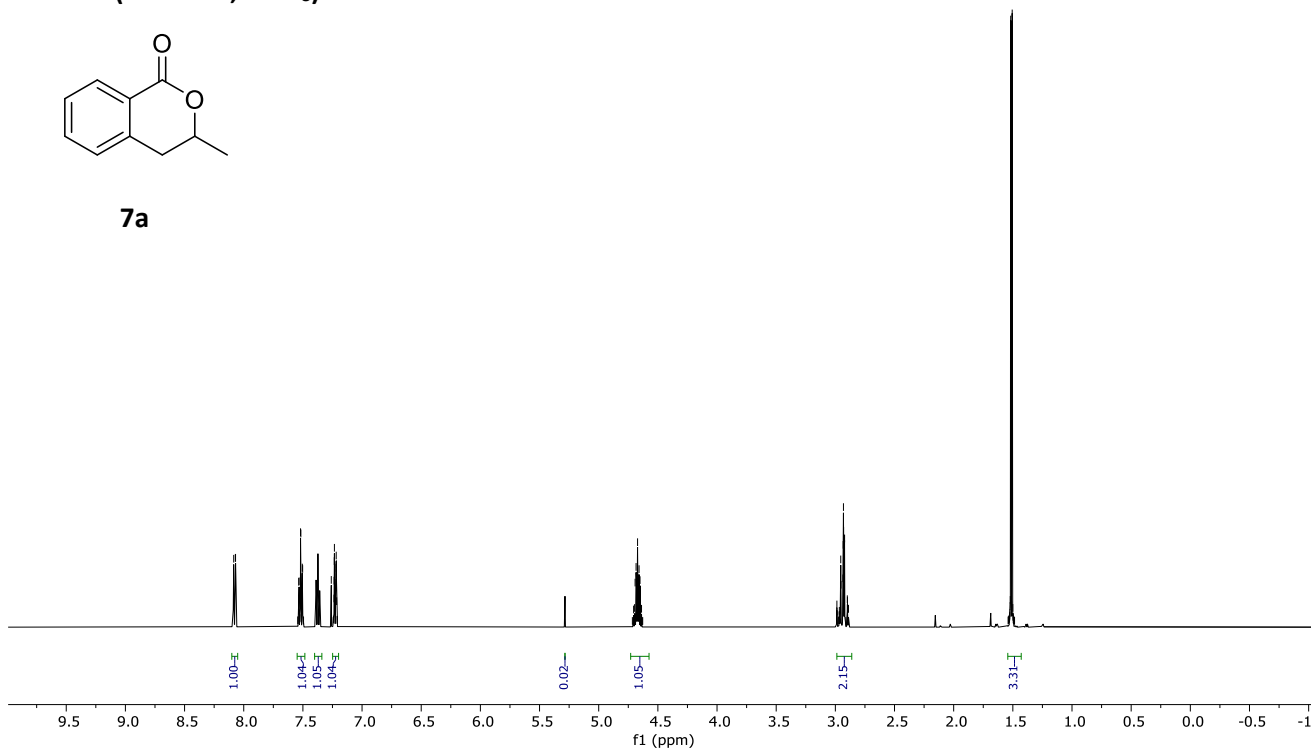

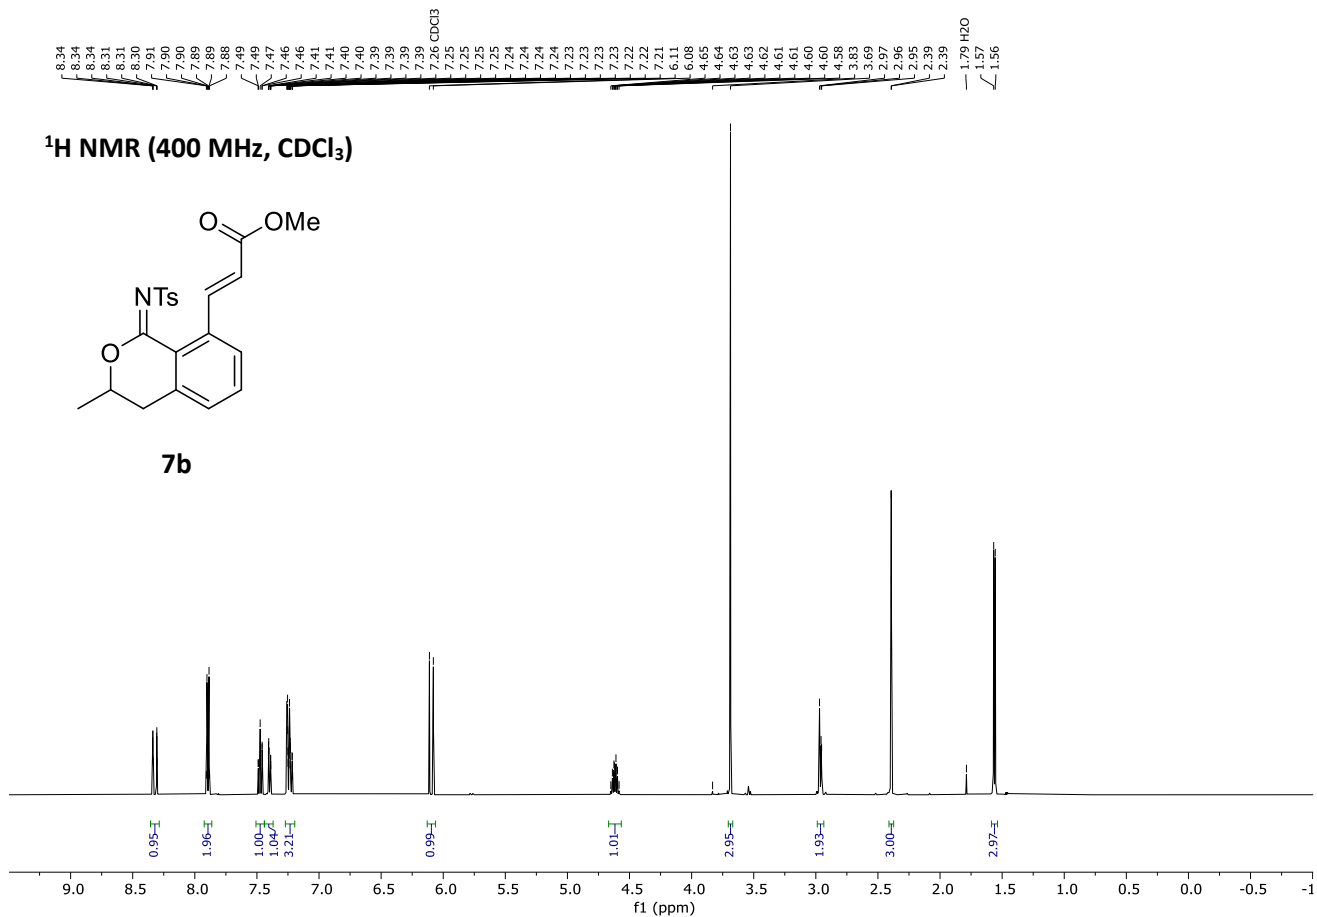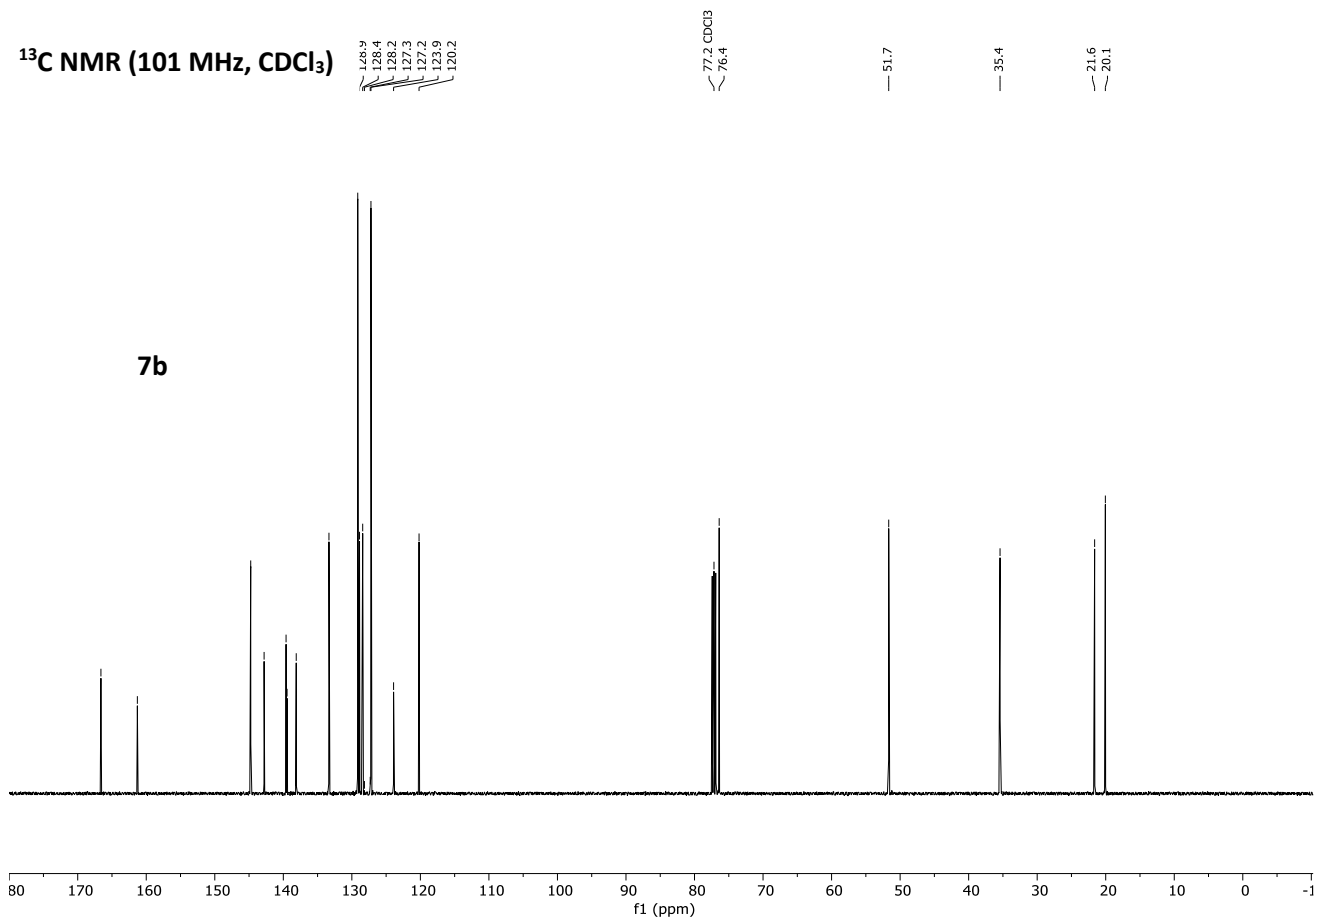

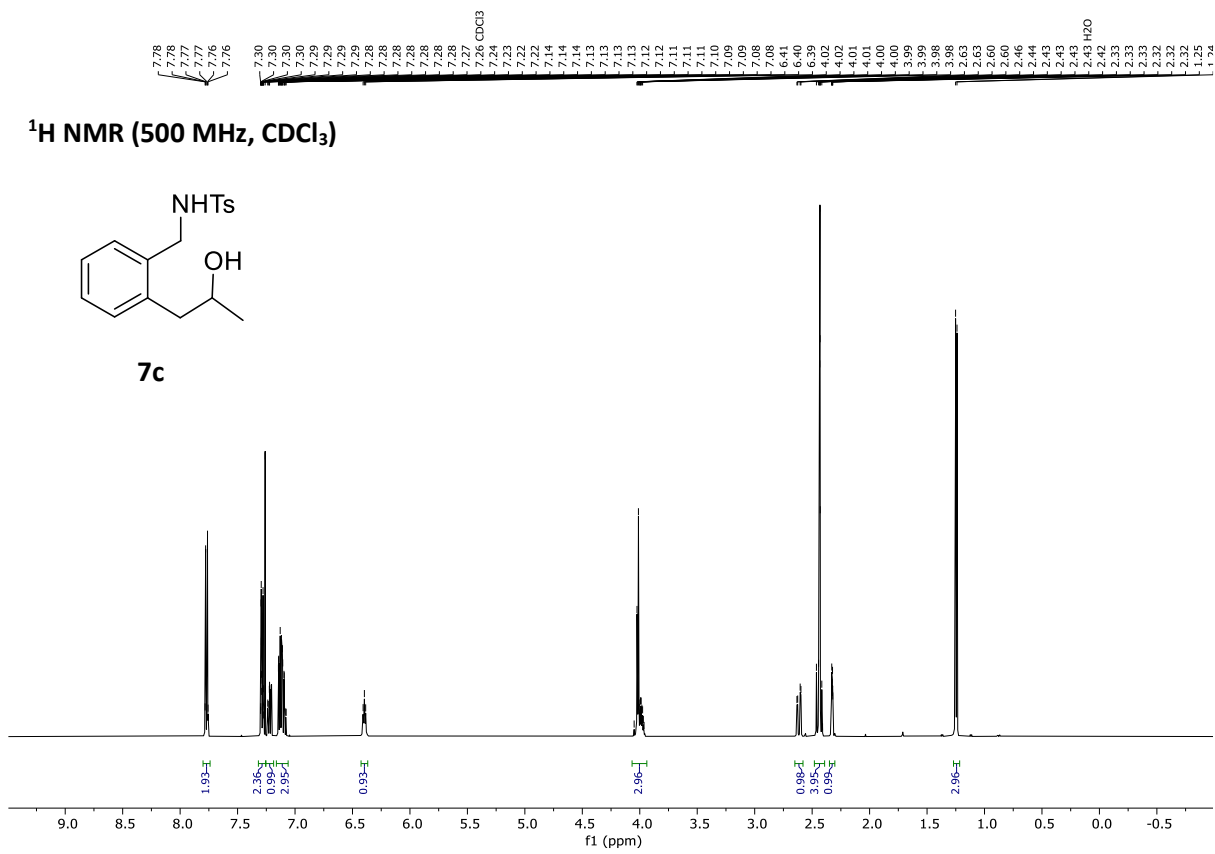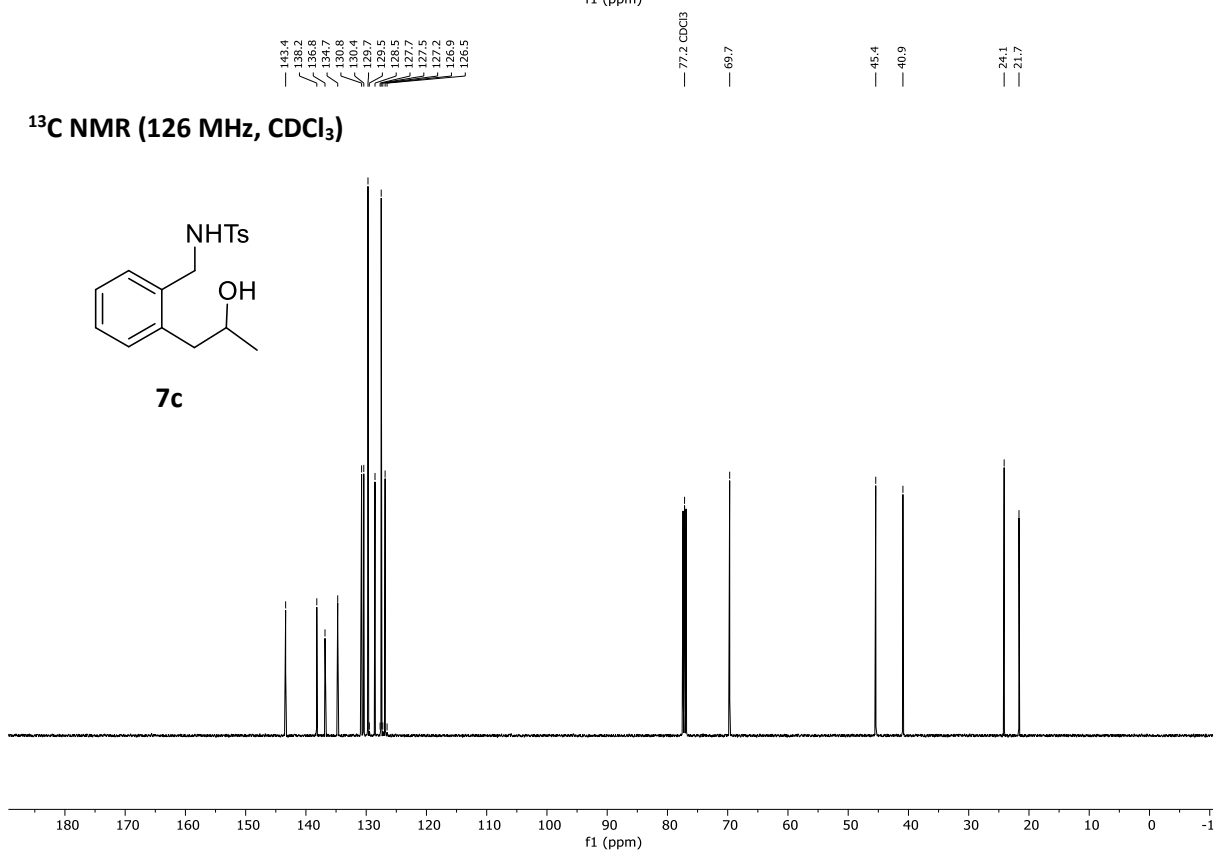

## Crystal Data for 4b

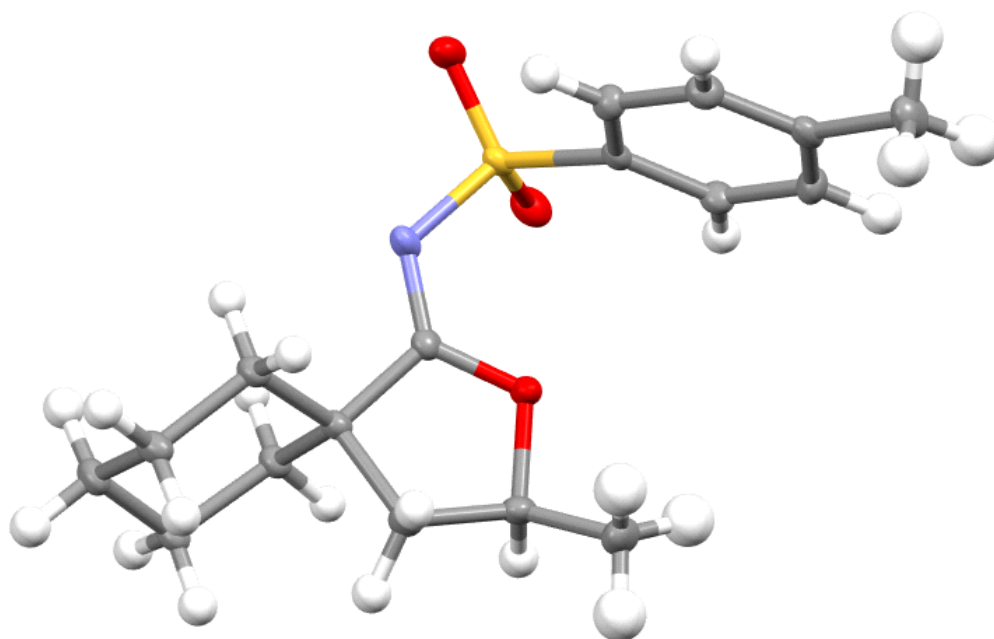

**Figure S1.** ORTEP diagram of **4b**. Atomic displacement parameters at 100 K are drawn at 50% probability level.

CCDC number: 2149820

**Table S1** Crystal data and structure refinement for **4b**.

|                     |                                                   |
|---------------------|---------------------------------------------------|
| Identification code | ca030122_1_1                                      |
| Empirical formula   | C <sub>17</sub> H <sub>23</sub> NO <sub>3</sub> S |
| Formula weight      | 321.42                                            |
| Temperature/K       | 100.0(1)                                          |
| Crystal system      | monoclinic                                        |
| Space group         | P2 <sub>1</sub> /n                                |
| a/Å                 | 10.07010(10)                                      |
| b/Å                 | 14.9683(2)                                        |
| c/Å                 | 11.03150(10)                                      |
| α/°                 | 90                                                |
| β/°                 | 95.9140(10)                                       |
| γ/°                 | 90                                                |



|                                             |                                                                  |
|---------------------------------------------|------------------------------------------------------------------|
| Volume/Å <sup>3</sup>                       | 1653.95(3)                                                       |
| Z                                           | 4                                                                |
| $\rho_{\text{calc}}/\text{g}/\text{cm}^3$   | 1.291                                                            |
| $\mu/\text{mm}^{-1}$                        | 1.838                                                            |
| F(000)                                      | 688.0                                                            |
| Crystal size/mm <sup>3</sup>                | 0.241 × 0.126 × 0.09                                             |
| Radiation                                   | Cu K $\alpha$ ( $\lambda = 1.54184$ )                            |
| 2 $\theta$ range for data collection/°      | 9.996 to 159.826                                                 |
| Index ranges                                | -12 ≤ h ≤ 12, -18 ≤ k ≤ 18, -13 ≤ l ≤ 14                         |
| Reflections collected                       | 21006                                                            |
| Independent reflections                     | 3540 [ $R_{\text{int}} = 0.0388$ , $R_{\text{sigma}} = 0.0233$ ] |
| Data/restraints/parameters                  | 3540/130/230                                                     |
| Goodness-of-fit on F <sup>2</sup>           | 1.048                                                            |
| Final R indexes [ $I \geq 2\sigma(I)$ ]     | $R_1 = 0.0338$ , $wR_2 = 0.0880$                                 |
| Final R indexes [all data]                  | $R_1 = 0.0362$ , $wR_2 = 0.0898$                                 |
| Largest diff. peak/hole / e Å <sup>-3</sup> | 0.29/-0.43                                                       |

## Crystal Data for 4h

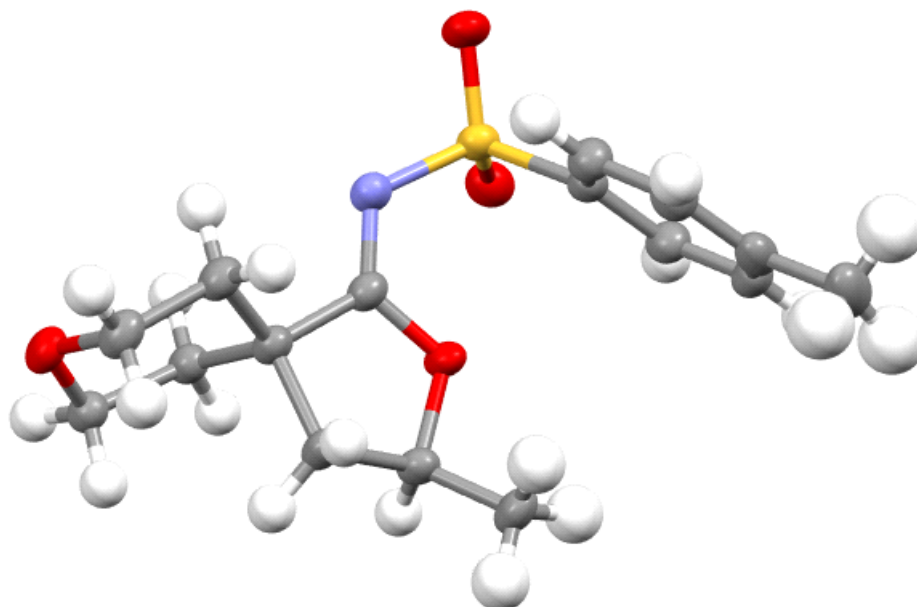

**Figure S2.** ORTEP diagram of **4b**. Atomic displacement parameters at 100 K are drawn at 50% probability level.

CCDC number: 2149821

**Table S2** Crystal data and structure refinement for **4h**.

|                     |                                                   |
|---------------------|---------------------------------------------------|
| Identification code | ca010122_1_1                                      |
| Empirical formula   | C <sub>16</sub> H <sub>21</sub> NO <sub>4</sub> S |
| Formula weight      | 323.40                                            |
| Temperature/K       | 100.0(1)                                          |
| Crystal system      | monoclinic                                        |
| Space group         | P2 <sub>1</sub> /n                                |
| a/Å                 | 8.8292(2)                                         |
| b/Å                 | 14.9090(2)                                        |

|                                             |                                                               |
|---------------------------------------------|---------------------------------------------------------------|
| c/Å                                         | 12.9967(2)                                                    |
| $\alpha$ /°                                 | 90                                                            |
| $\beta$ /°                                  | 109.811(2)                                                    |
| $\gamma$ /°                                 | 90                                                            |
| Volume/Å <sup>3</sup>                       | 1609.56(5)                                                    |
| Z                                           | 4                                                             |
| $\rho_{\text{calc}}$ /cm <sup>3</sup>       | 1.335                                                         |
| $\mu$ /mm <sup>-1</sup>                     | 1.941                                                         |
| F(000)                                      | 688.0                                                         |
| Crystal size/mm <sup>3</sup>                | 0.236 × 0.139 × 0.055                                         |
| Radiation                                   | Cu K $\alpha$ ( $\lambda$ = 1.54184)                          |
| 2 $\theta$ range for data collection/°      | 9.354 to 159.86                                               |
| Index ranges                                | -11 ≤ h ≤ 11, -18 ≤ k ≤ 19, -16 ≤ l ≤ 16                      |
| Reflections collected                       | 31338                                                         |
| Independent reflections                     | 3487 [R <sub>int</sub> = 0.0787, R <sub>sigma</sub> = 0.0317] |
| Data/restraints/parameters                  | 3487/52/230                                                   |
| Goodness-of-fit on F <sup>2</sup>           | 1.106                                                         |
| Final R indexes [I >= 2 $\sigma$ (I)]       | R <sub>1</sub> = 0.0429, wR <sub>2</sub> = 0.1162             |
| Final R indexes [all data]                  | R <sub>1</sub> = 0.0475, wR <sub>2</sub> = 0.1195             |
| Largest diff. peak/hole / e Å <sup>-3</sup> | 0.41/-0.48                                                    |

### Crystal Data for 4q

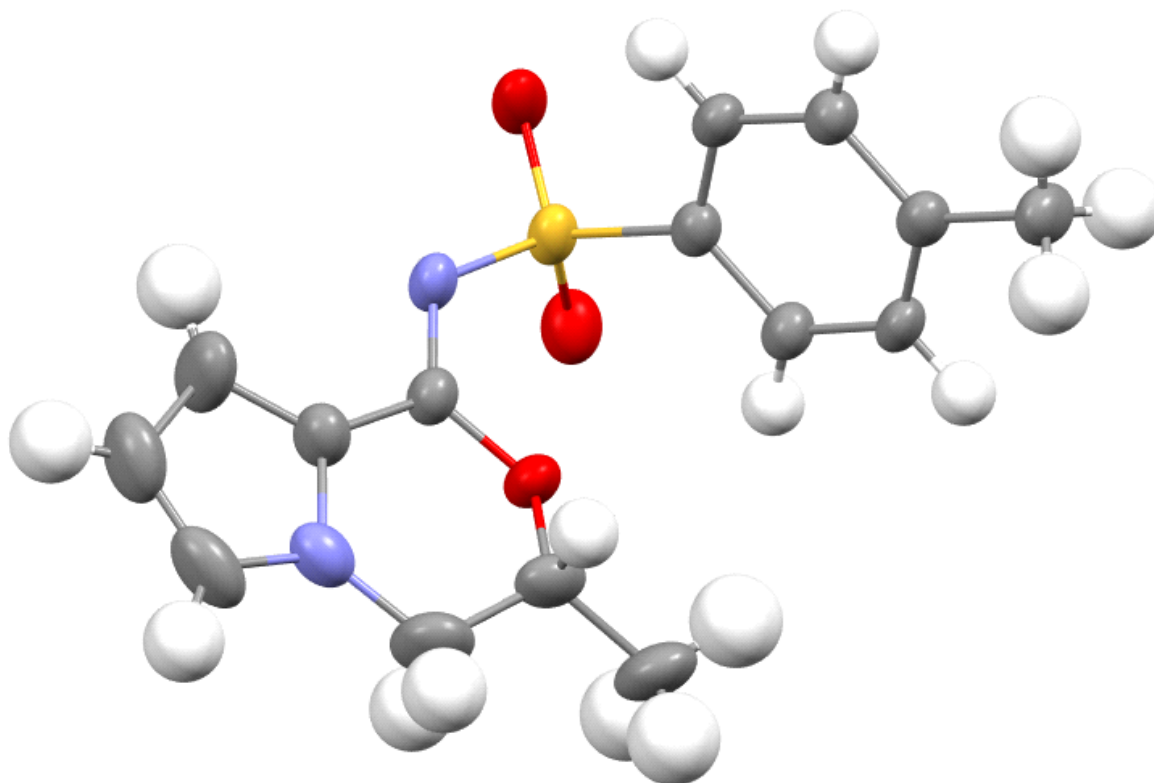

**Figure S3.** ORTEP diagram of **4q**. Atomic displacement parameters at 100 K are drawn at 50% probability level.

CCDC number: 2149822

**Table S3** Crystal data and structure refinement for **4q**.

|                     |                                                                 |
|---------------------|-----------------------------------------------------------------|
| Identification code | ca020122_2_1                                                    |
| Empirical formula   | C <sub>15</sub> H <sub>16</sub> N <sub>2</sub> O <sub>3</sub> S |
| Formula weight      | 304.36                                                          |
| Temperature/K       | 100.0(1)                                                        |
| Crystal system      | monoclinic                                                      |
| Space group         | P2 <sub>1</sub>                                                 |
| a/Å                 | 8.0727(2)                                                       |
| b/Å                 | 9.6509(2)                                                       |
| c/Å                 | 9.8203(2)                                                       |

|                                                |                                                               |
|------------------------------------------------|---------------------------------------------------------------|
| $\alpha/^\circ$                                | 90                                                            |
| $\beta/^\circ$                                 | 104.349(2)                                                    |
| $\gamma/^\circ$                                | 90                                                            |
| Volume/ $\text{\AA}^3$                         | 741.22(3)                                                     |
| Z                                              | 2                                                             |
| $\rho_{\text{calc}}/\text{cm}^3$               | 1.364                                                         |
| $\mu/\text{mm}^{-1}$                           | 2.047                                                         |
| F(000)                                         | 320.0                                                         |
| Crystal size/ $\text{mm}^3$                    | 0.202 × 0.09 × 0.058                                          |
| Radiation                                      | Cu K $\alpha$ ( $\lambda = 1.54184$ )                         |
| 2 $\theta$ range for data collection/ $^\circ$ | 9.296 to 159.506                                              |
| Index ranges                                   | $-10 \leq h \leq 10, -12 \leq k \leq 12, -12 \leq l \leq 12$  |
| Reflections collected                          | 22389                                                         |
| Independent reflections                        | 3150 [ $R_{\text{int}} = 0.0515, R_{\text{sigma}} = 0.0251$ ] |
| Data/restraints/parameters                     | 3150/70/212                                                   |
| Goodness-of-fit on $F^2$                       | 1.064                                                         |
| Final R indexes [ $I \geq 2\sigma(I)$ ]        | $R_1 = 0.0401, wR_2 = 0.1057$                                 |
| Final R indexes [all data]                     | $R_1 = 0.0426, wR_2 = 0.1083$                                 |
| Largest diff. peak/hole / $e \text{\AA}^{-3}$  | 0.16/-0.55                                                    |
| Flack parameter                                | 0.044(13)                                                     |

## Crystal Data for 4s

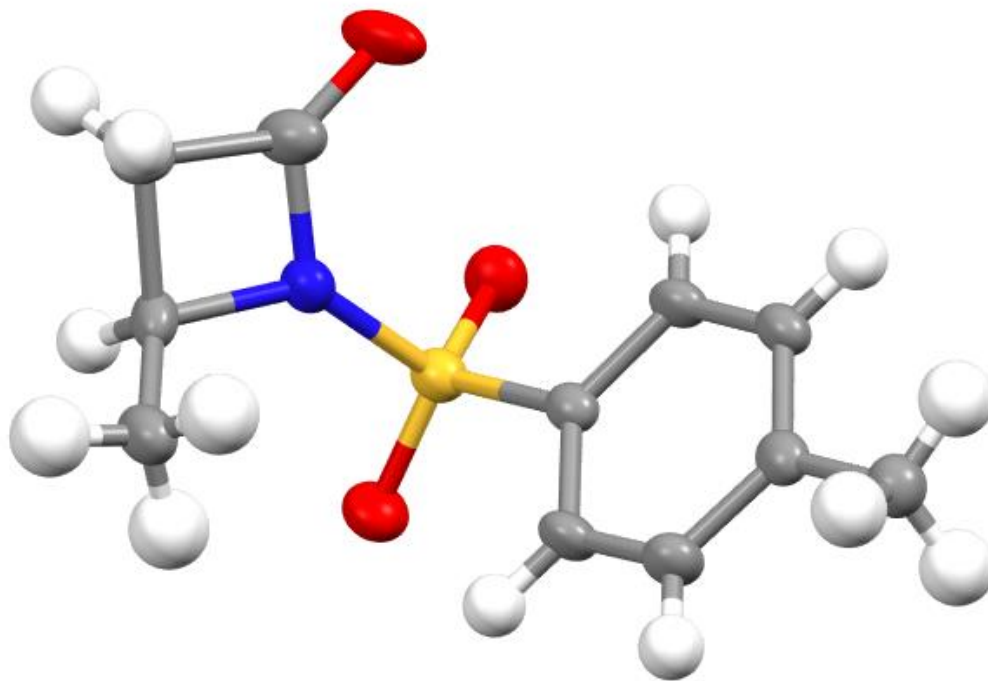

**Figure S4.** ORTEP diagram of **4s**. Atomic displacement parameters at 100 K are drawn at 50% probability level.

CCDC number: 2149823

**Table S4** Crystal data and structure refinement for **4s**.

|                     |                                                   |
|---------------------|---------------------------------------------------|
| Identification code | ca121021_1_1                                      |
| Empirical formula   | C <sub>11</sub> H <sub>13</sub> NO <sub>3</sub> S |
| Formula weight      | 239.28                                            |
| Temperature/K       | 100.0(1)                                          |
| Crystal system      | triclinic                                         |
| Space group         | P-1                                               |
| a/Å                 | 7.5584(2)                                         |

|                                             |                                                                |
|---------------------------------------------|----------------------------------------------------------------|
| b/Å                                         | 11.0650(3)                                                     |
| c/Å                                         | 14.3491(4)                                                     |
| $\alpha$ /°                                 | 83.402(2)                                                      |
| $\beta$ /°                                  | 81.007(2)                                                      |
| $\gamma$ /°                                 | 75.074(2)                                                      |
| Volume/Å <sup>3</sup>                       | 1141.82(6)                                                     |
| Z                                           | 4                                                              |
| $\rho_{\text{calc}}$ /cm <sup>3</sup>       | 1.392                                                          |
| $\mu$ /mm <sup>-1</sup>                     | 2.471                                                          |
| F(000)                                      | 504.0                                                          |
| Crystal size/mm <sup>3</sup>                | 0.17 × 0.136 × 0.099                                           |
| Radiation                                   | Cu K $\alpha$ ( $\lambda$ = 1.54184)                           |
| 2 $\theta$ range for data collection/°      | 6.256 to 160.452                                               |
| Index ranges                                | -8 ≤ h ≤ 9, -14 ≤ k ≤ 14, -18 ≤ l ≤ 18                         |
| Reflections collected                       | 24269                                                          |
| Independent reflections                     | 4756 [ $R_{\text{int}}$ = 0.0394, $R_{\text{sigma}}$ = 0.0272] |
| Data/restraints/parameters                  | 4756/148/368                                                   |
| Goodness-of-fit on $F^2$                    | 1.098                                                          |
| Final R indexes [ $I \geq 2\sigma(I)$ ]     | $R_1$ = 0.0590, $wR_2$ = 0.1346                                |
| Final R indexes [all data]                  | $R_1$ = 0.0636, $wR_2$ = 0.1368                                |
| Largest diff. peak/hole / e Å <sup>-3</sup> | 0.51/-0.66                                                     |

## Crystal Data for 4w

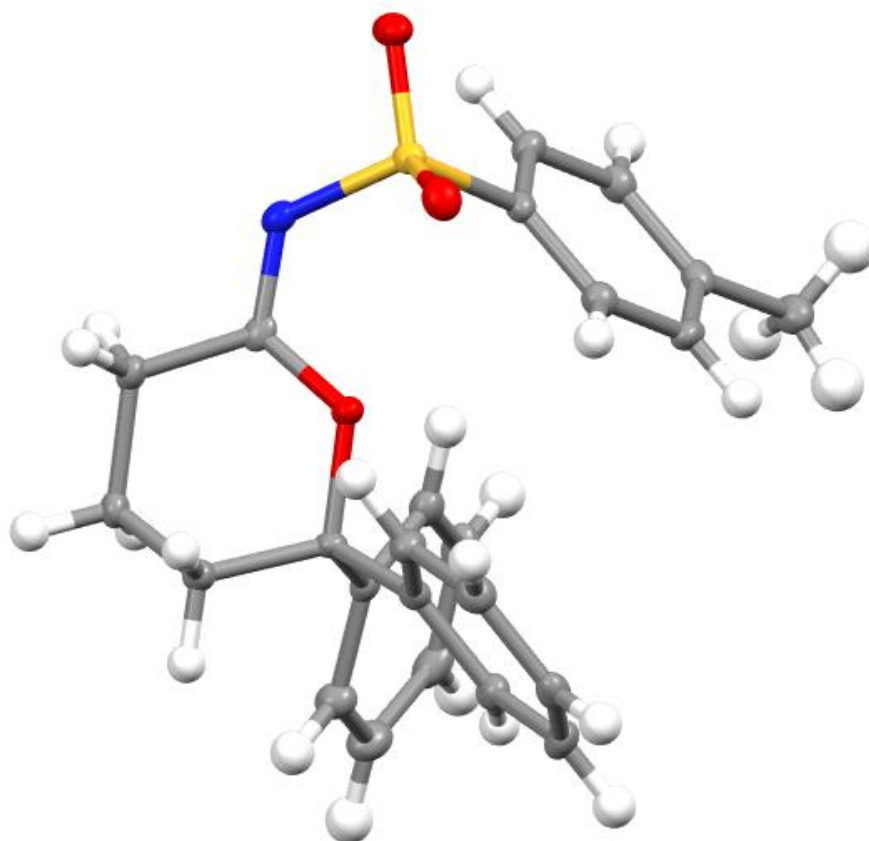

**Figure S5.** ORTEP diagram of **4w**. Atomic displacement parameters at 100 K are drawn at 50% probability level.

CCDC number: 2149819

**Table S5** Crystal data and structure refinement for **4w**.

|                     |                                                   |
|---------------------|---------------------------------------------------|
| Identification code | ca270122_1_1                                      |
| Empirical formula   | C <sub>24</sub> H <sub>23</sub> NO <sub>3</sub> S |
| Formula weight      | 405.49                                            |
| Temperature/K       | 100.0(1)                                          |
| Crystal system      | monoclinic                                        |
| Space group         | P2 <sub>1</sub>                                   |
| a/Å                 | 11.35950(10)                                      |



|                                             |                                                                |
|---------------------------------------------|----------------------------------------------------------------|
| b/Å                                         | 7.46330(10)                                                    |
| c/Å                                         | 11.66000(10)                                                   |
| $\alpha$ /°                                 | 90                                                             |
| $\beta$ /°                                  | 97.8050(10)                                                    |
| $\gamma$ /°                                 | 90                                                             |
| Volume/Å <sup>3</sup>                       | 979.369(18)                                                    |
| Z                                           | 2                                                              |
| $\rho_{\text{calc}}$ /cm <sup>3</sup>       | 1.375                                                          |
| $\mu$ /mm <sup>-1</sup>                     | 1.680                                                          |
| F(000)                                      | 428.0                                                          |
| Crystal size/mm <sup>3</sup>                | 0.277 × 0.155 × 0.07                                           |
| Radiation                                   | Cu K $\alpha$ ( $\lambda$ = 1.54184)                           |
| 2 $\theta$ range for data collection/°      | 7.652 to 159.556                                               |
| Index ranges                                | -14 ≤ h ≤ 14, -9 ≤ k ≤ 9, -14 ≤ l ≤ 14                         |
| Reflections collected                       | 20181                                                          |
| Independent reflections                     | 4156 [ $R_{\text{int}}$ = 0.0473, $R_{\text{sigma}}$ = 0.0332] |
| Data/restraints/parameters                  | 4156/1/263                                                     |
| Goodness-of-fit on F <sup>2</sup>           | 1.059                                                          |
| Final R indexes [ $I \geq 2\sigma(I)$ ]     | $R_1$ = 0.0318, $wR_2$ = 0.0748                                |
| Final R indexes [all data]                  | $R_1$ = 0.0340, $wR_2$ = 0.0778                                |
| Largest diff. peak/hole / e Å <sup>-3</sup> | 0.29/-0.38                                                     |
| Flack parameter                             | -0.002(9)                                                      |
